# Supplementary material
Source: PubMed Central journal article supplement (PMC4353025)

## Development of a Concise Synthesis of Ouabagenin and Hydroxylated Corticosteroid Analogs

Hans Renata,<sup>†</sup> Qianghui Zhou,<sup>†</sup> Georg Dünstl,<sup>‡</sup> Jakob Felding,<sup>‡</sup> Rohan R. Merchant, Chien-Hung Yeh,  
and Phil S. Baran\*

Contribution from the Department of Chemistry, The Scripps Research Institute, 10550 North Torrey Pines Road, La Jolla,  
California 92037, United States, and Front End Innovation, LEO Pharma A/S, Industriparken 55, 2750 Ballerup, Denmark

### SUPPLEMENTARY MATERIAL – PART 2 – SPECTRA

#### Table of Contents

|                              |      |          |
|------------------------------|------|----------|
| Spectra for compounds .....  | page | SI-3–134 |
| Compound <b>32</b> .....     | page | SI-3     |
| Compound <b>40</b> .....     | page | SI-5     |
| Compound <b>41</b> .....     | page | SI-7     |
| Compound <b>45</b> .....     | page | SI-9     |
| Compound <b>46</b> .....     | page | SI-10    |
| Compound <b>47</b> .....     | page | SI-12    |
| Compound <b>49</b> .....     | page | SI-14    |
| Compound <b>50</b> .....     | page | SI-16    |
| Compound <b>51</b> .....     | page | SI-18    |
| Compound <b>53</b> .....     | page | SI-20    |
| Compound <b>54</b> .....     | page | SI-22    |
| Compound <b>55</b> .....     | page | SI-24    |
| Compound <b>56</b> .....     | page | SI-26    |
| Compound <b>57</b> .....     | page | SI-28    |
| Compound <b>58</b> .....     | page | SI-30    |
| Compound <b>59</b> .....     | page | SI-32    |
| Compound <b>SI-1-1</b> ..... | page | SI-34    |
| Compound <b>60</b> .....     | page | SI-36    |
| Compound <b>SI-1-2</b> ..... | page | SI-38    |
| Compound <b>61</b> .....     | page | SI-40    |
| Compound <b>62</b> .....     | page | SI-42    |
| Compound <b>63</b> .....     | page | SI-44    |
| Compound <b>64</b> .....     | page | SI-46    |
| Compound <b>68</b> .....     | page | SI-48    |
| Compound <b>69</b> .....     | page | SI-50    |
| Compound <b>71</b> .....     | page | SI-52    |
| Compound <b>74</b> .....     | page | SI-54    |
| Compound <b>75</b> .....     | page | SI-56    |
| Compound <b>70</b> .....     | page | SI-58    |
| Compound <b>79</b> .....     | page | SI-60    |
| Compound <b>82</b> .....     | page | SI-62    |

|                                            |      |        |
|--------------------------------------------|------|--------|
| Compound <b>83</b> .....                   | page | SI-64  |
| Compound <b>SI-1-5</b> .....               | page | SI-66  |
| Compound <b>85</b> .....                   | page | SI-68  |
| Compound <b>86</b> .....                   | page | SI-70  |
| Compound <b>SI-1-4</b> .....               | page | SI-72  |
| Comparison spectra for <b>SI-1-4</b> ..... | page | SI-74  |
| Ouabagenin ( <b>1</b> ).....               | page | SI-76  |
| Comparison spectra for <b>1</b> .....      | page | SI-78  |
| Comparison tables for <b>SI-1-4</b> .....  | page | SI-80  |
| Comparison tables for <b>1</b> .....       | page | SI-81  |
| Compound <b>SI-2-2</b> .....               | page | SI-84  |
| Compound <b>88</b> .....                   | page | SI-86  |
| Compound <b>SI-2-3</b> .....               | page | SI-88  |
| Compound <b>89</b> .....                   | page | SI-90  |
| Compound <b>90</b> .....                   | page | SI-92  |
| Compound <b>SI-2-3a</b> .....              | page | SI-94  |
| Compound <b>SI-2-3b</b> .....              | page | SI-96  |
| Compound <b>SI-2-4</b> .....               | page | SI-98  |
| Compound <b>SI-2-5</b> .....               | page | SI-100 |
| Compound <b>91</b> .....                   | page | SI-102 |
| Compound <b>SI-2-5a</b> .....              | page | SI-104 |
| Compound <b>SI-2-6</b> .....               | page | SI-106 |
| Compound <b>SI-2-7</b> .....               | page | SI-108 |
| Compound <b>SI-2-7a</b> .....              | page | SI-110 |
| Compound <b>SI-2-8</b> .....               | page | SI-112 |
| Compound <b>92</b> .....                   | page | SI-114 |
| Compound <b>93</b> .....                   | page | SI-116 |
| Compound <b>94</b> .....                   | page | SI-118 |
| Compound <b>95</b> .....                   | page | SI-120 |
| Compound <b>SI-2-8a</b> .....              | page | SI-122 |
| Compound <b>97</b> .....                   | page | SI-124 |
| Compound <b>96</b> .....                   | page | SI-126 |
| Compound <b>SI-2-9</b> .....               | page | SI-129 |
| Compound <b>98</b> .....                   | page | SI-132 |

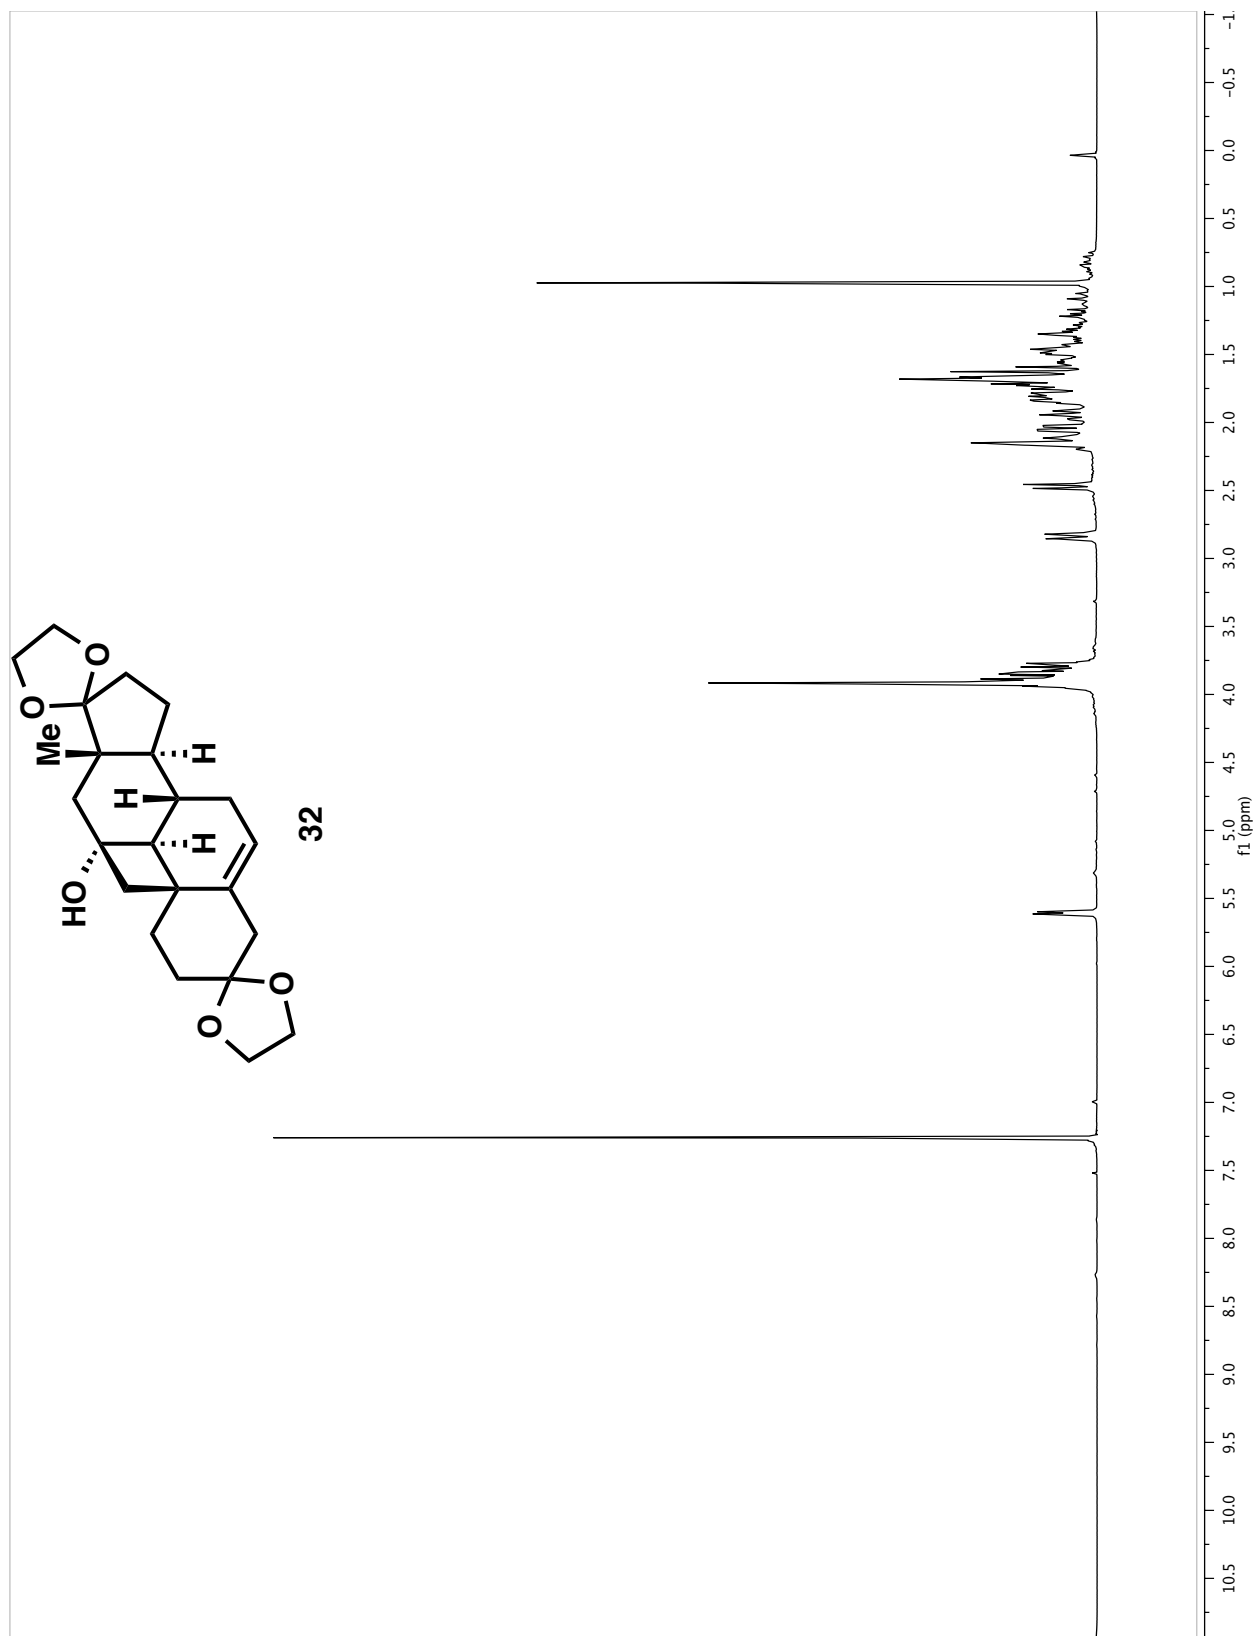

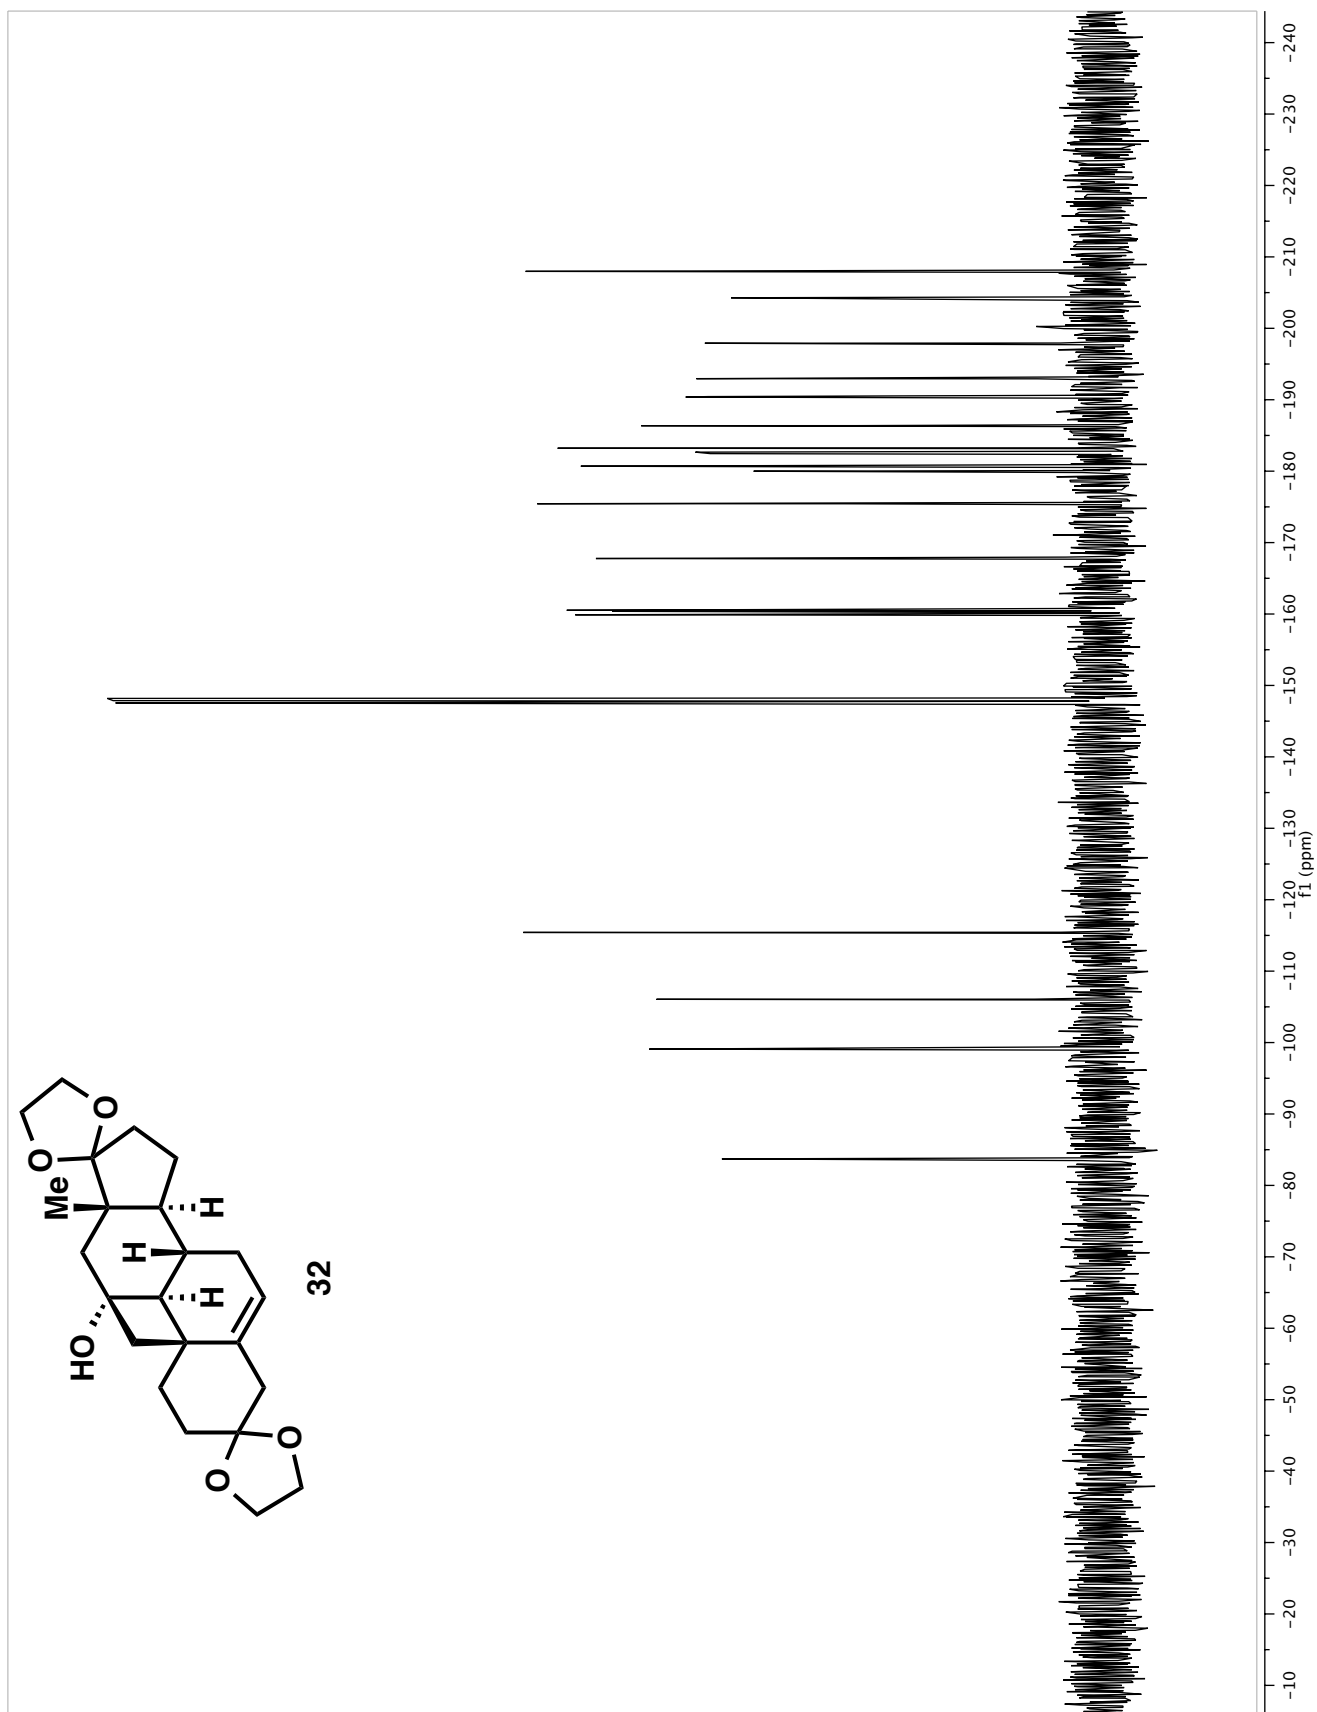

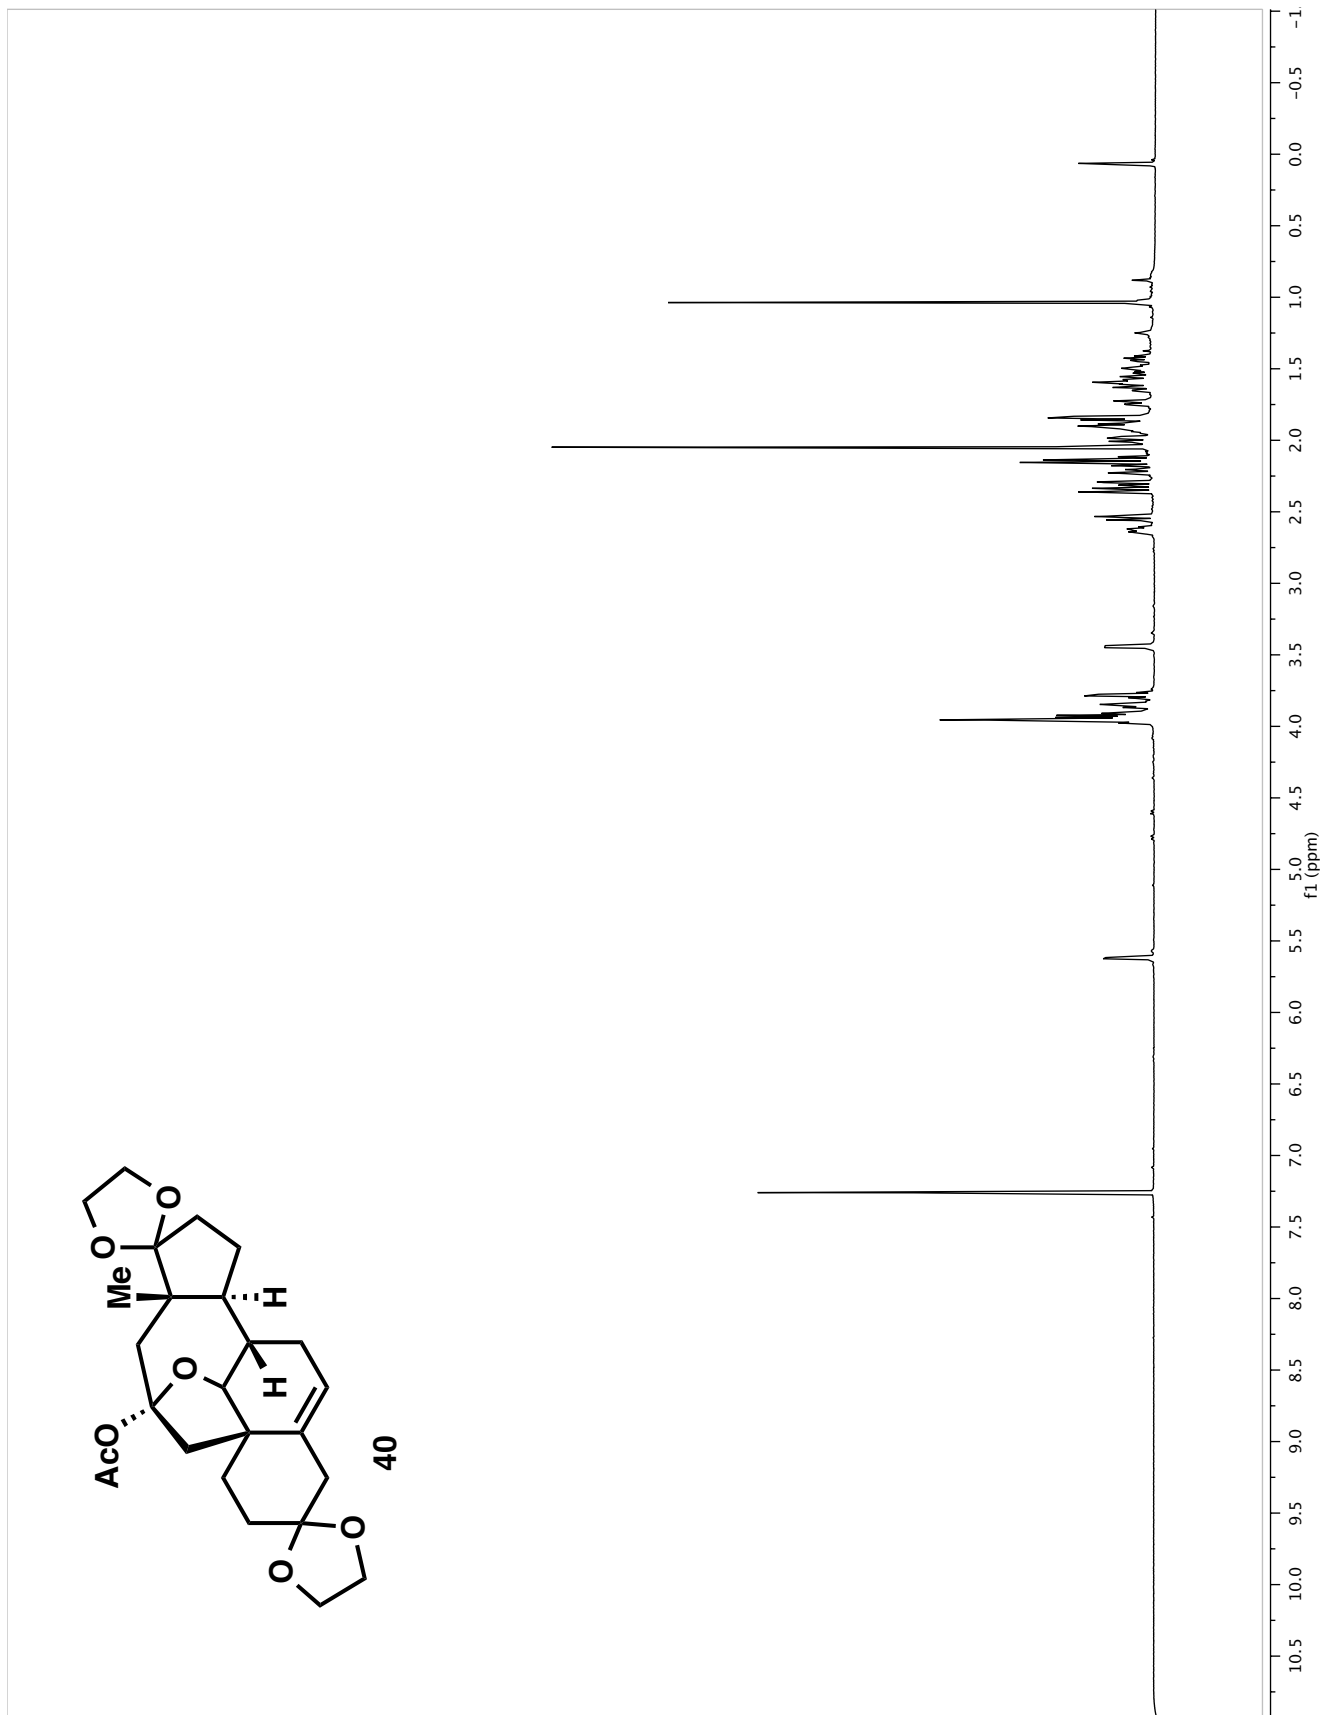

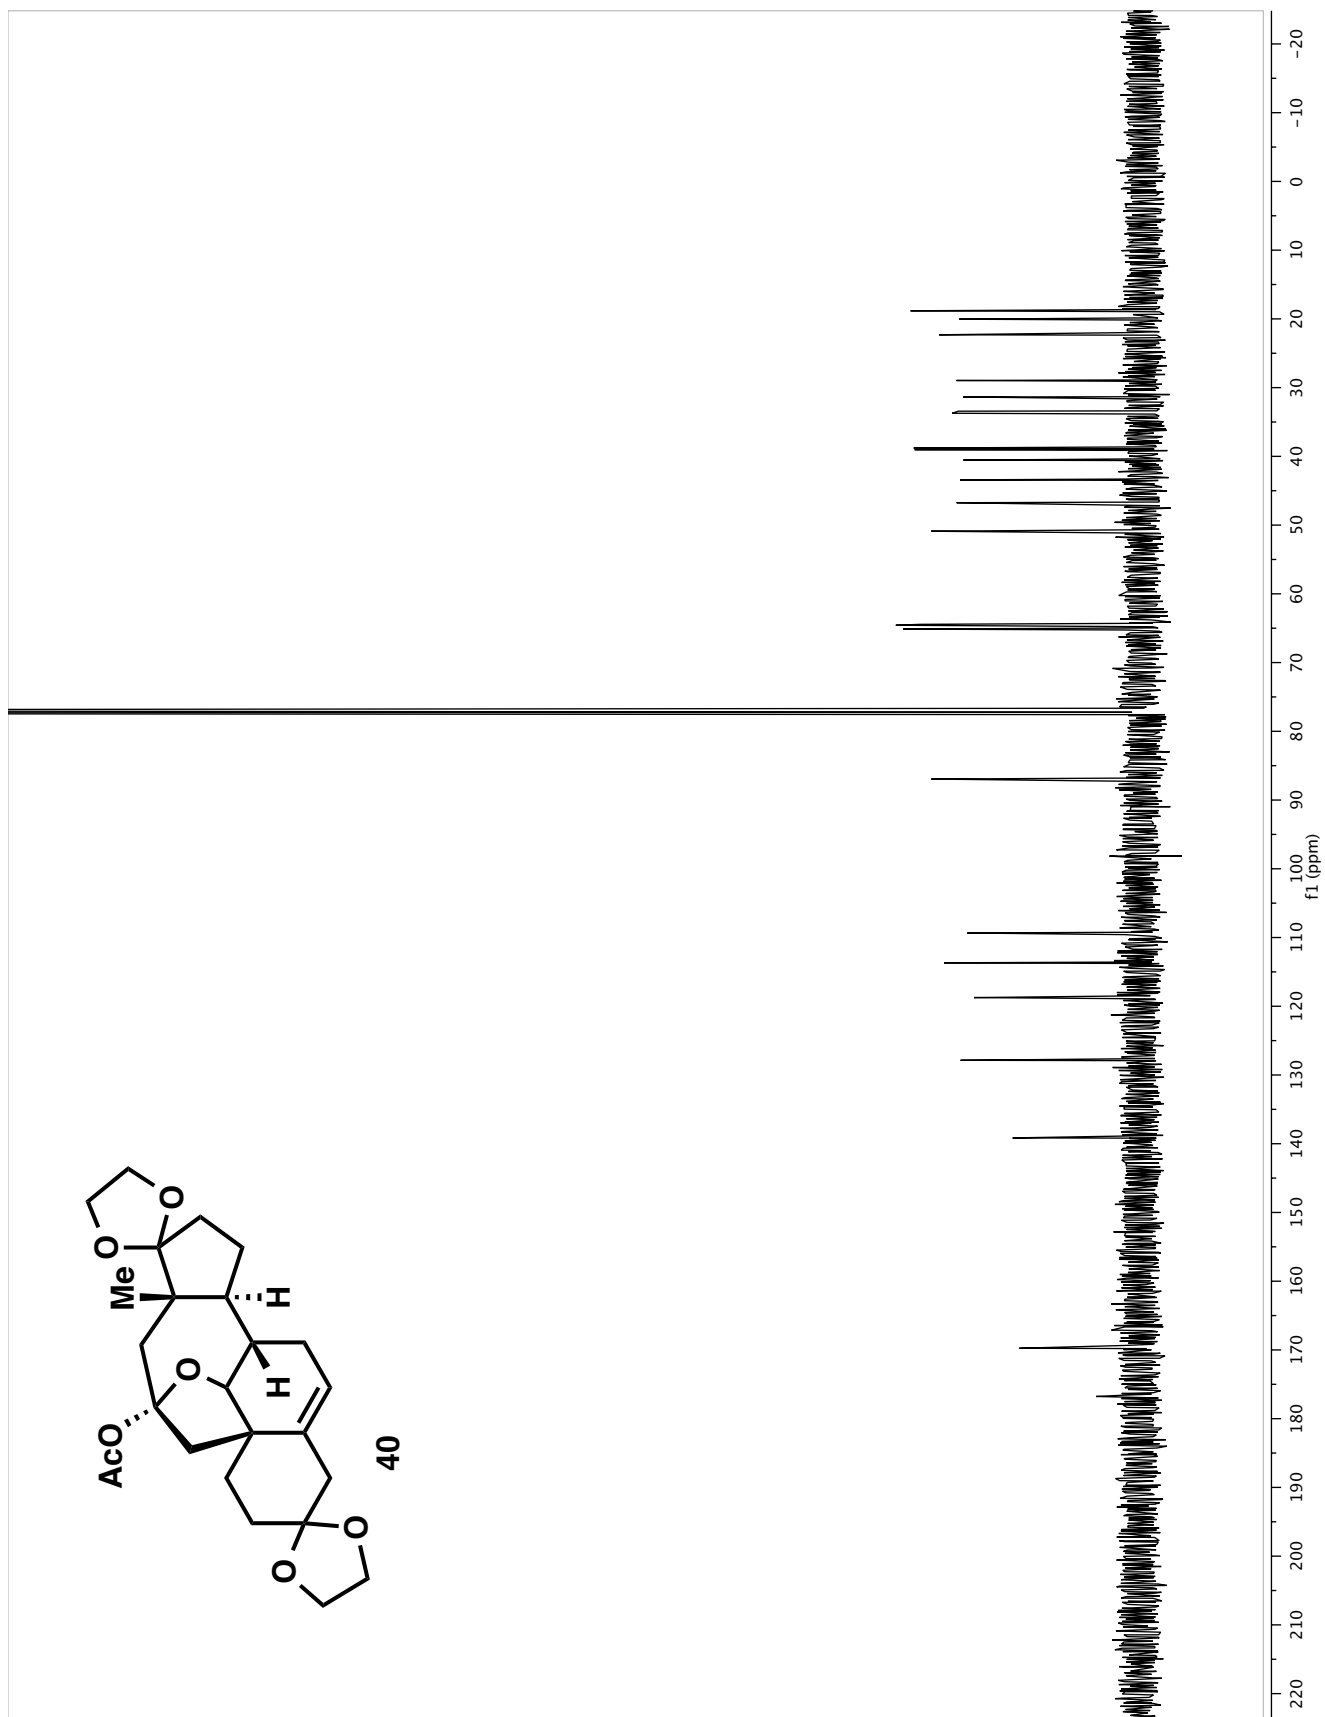

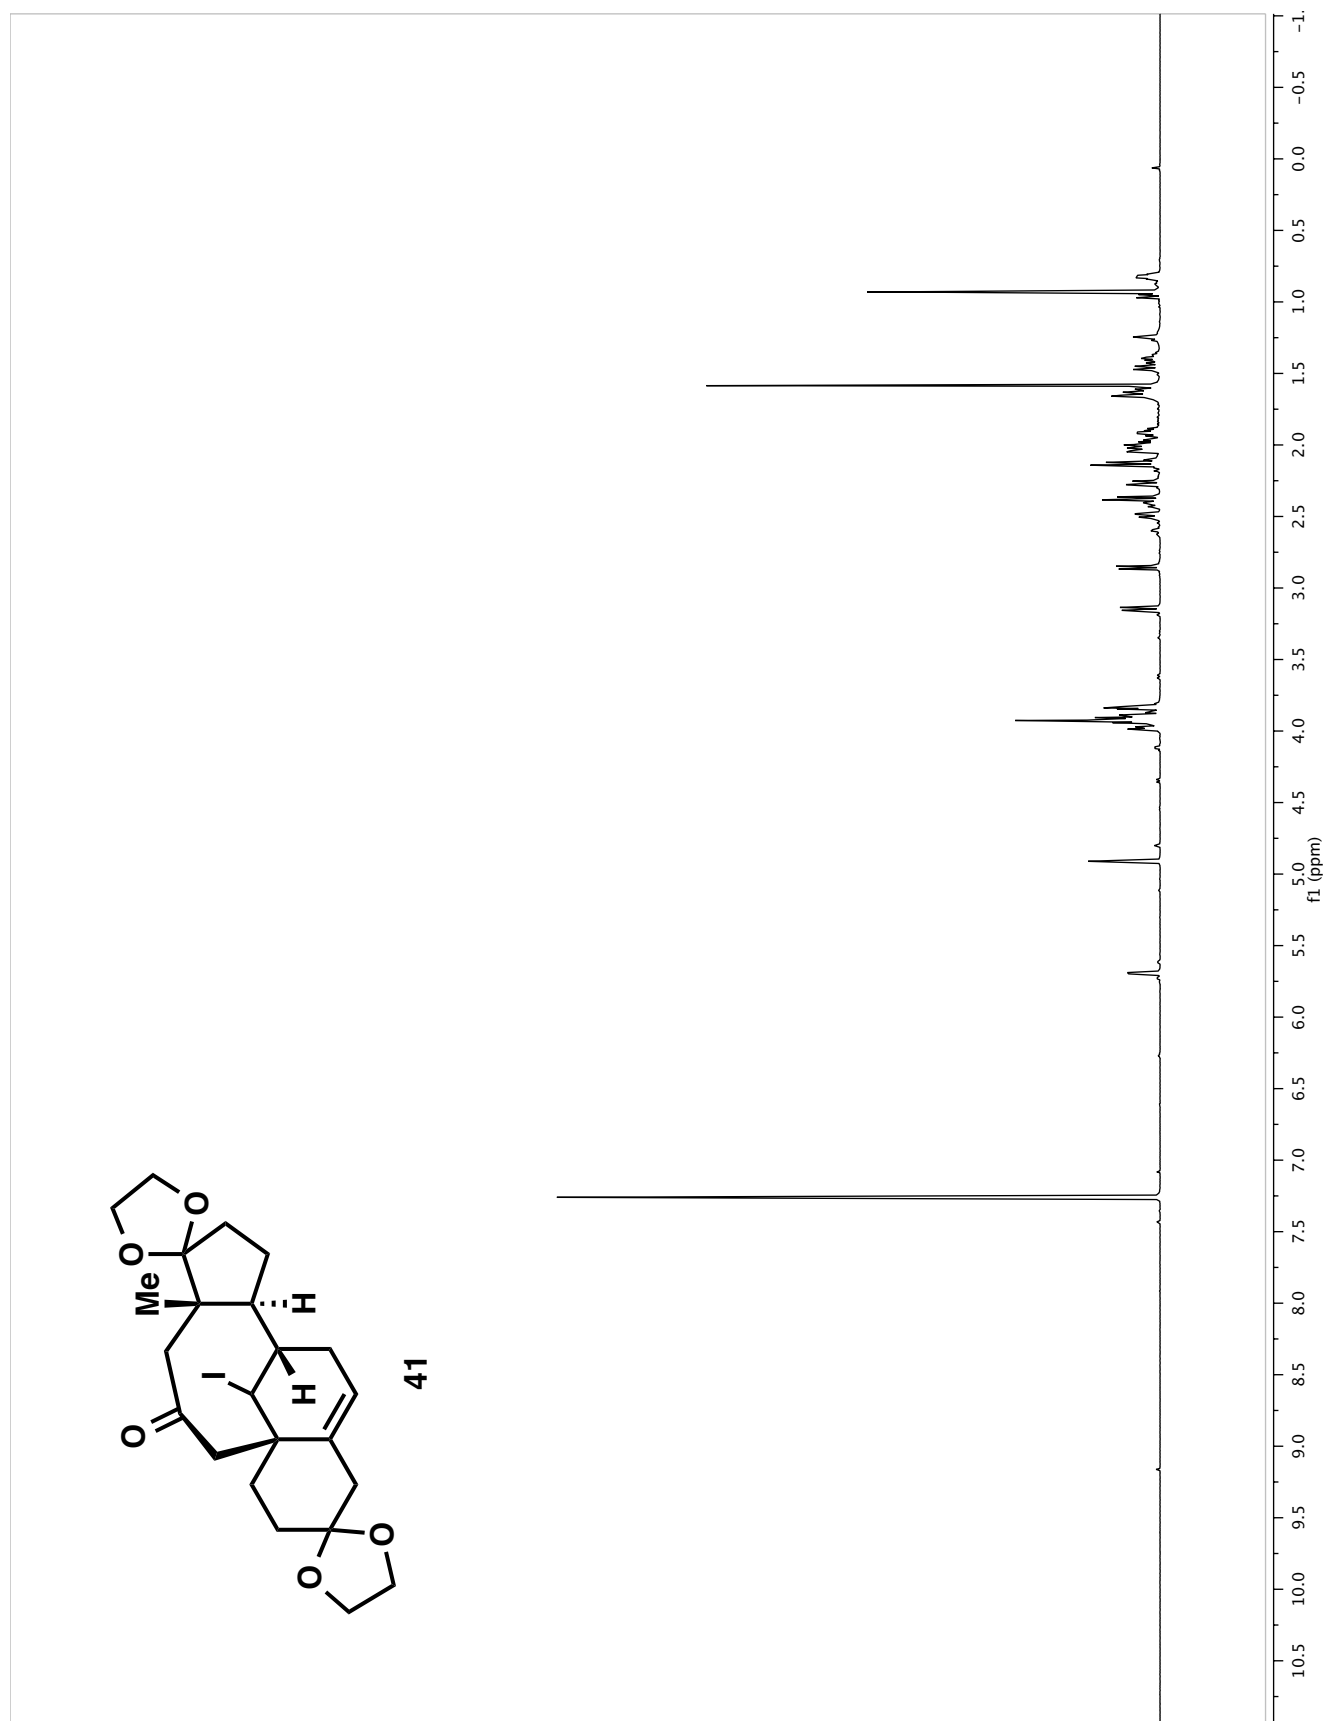

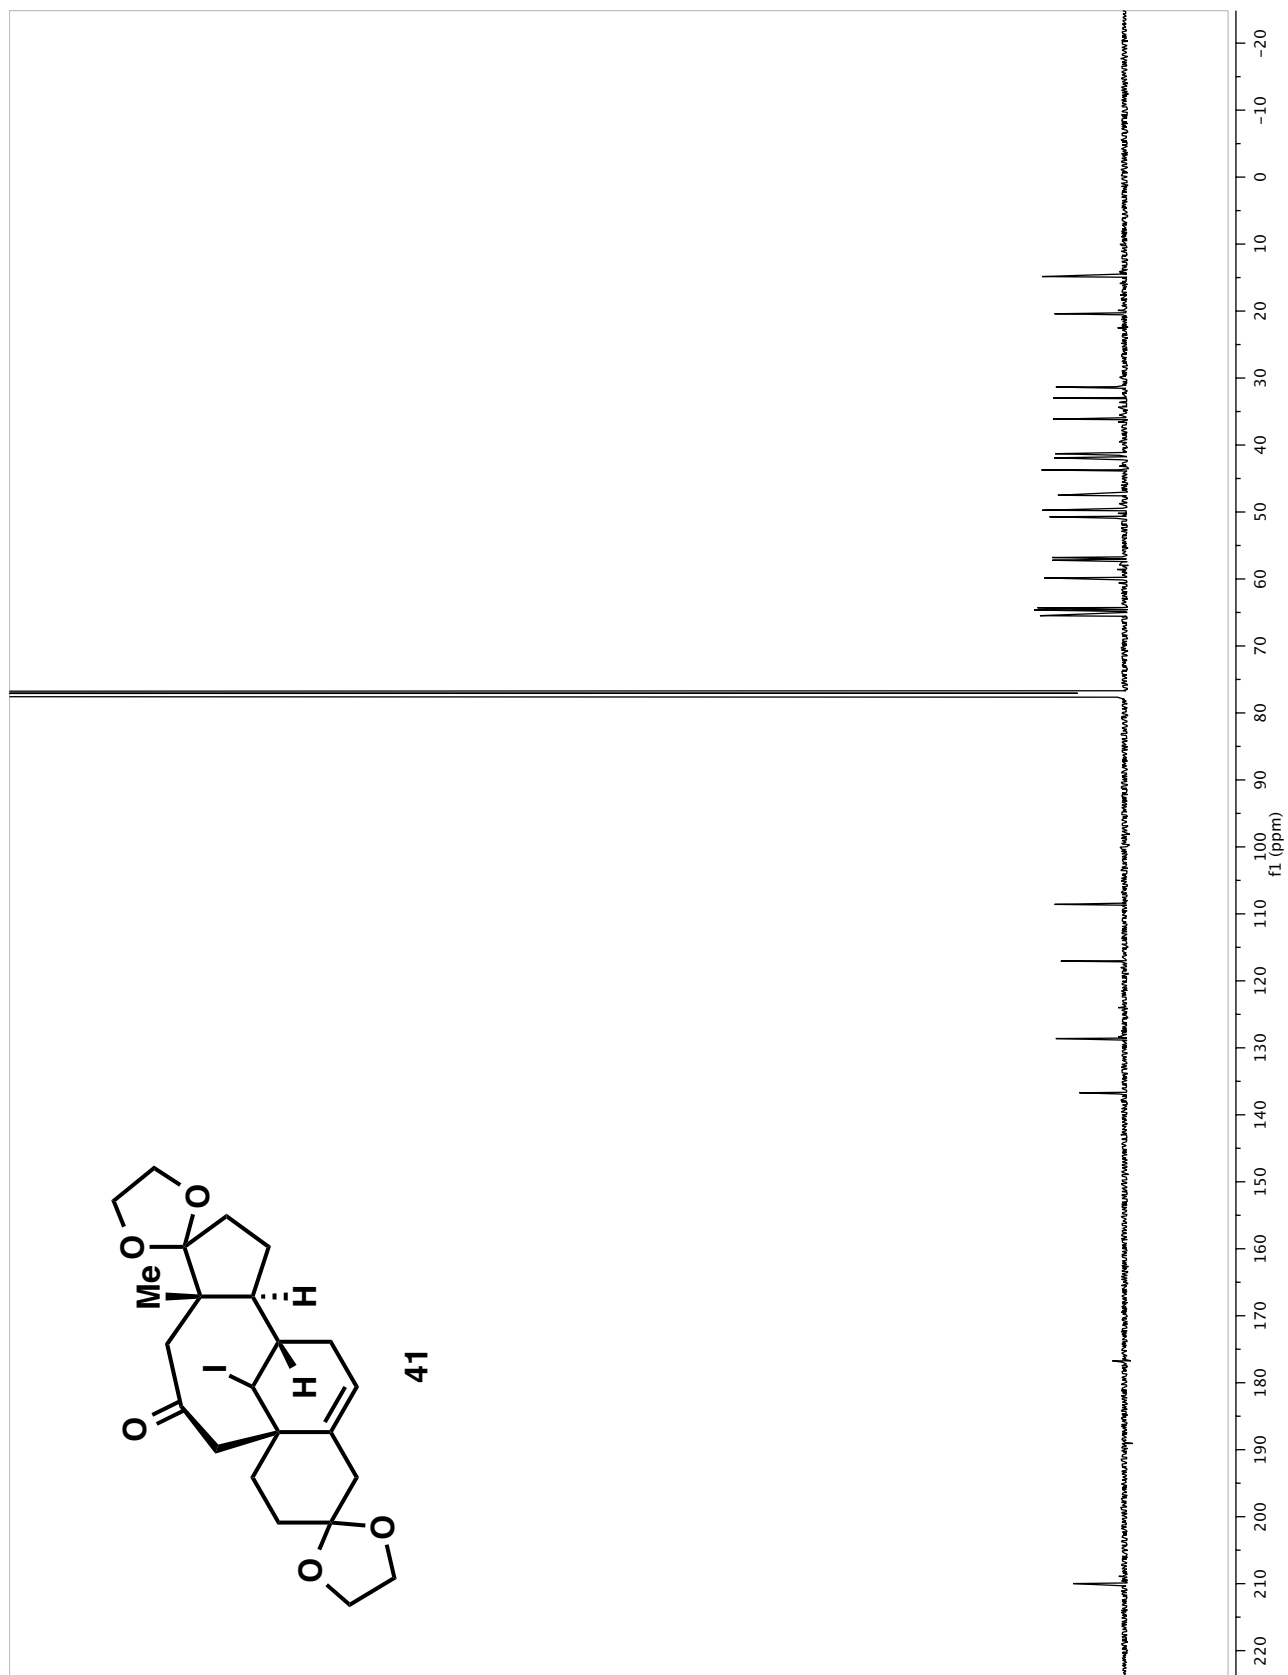



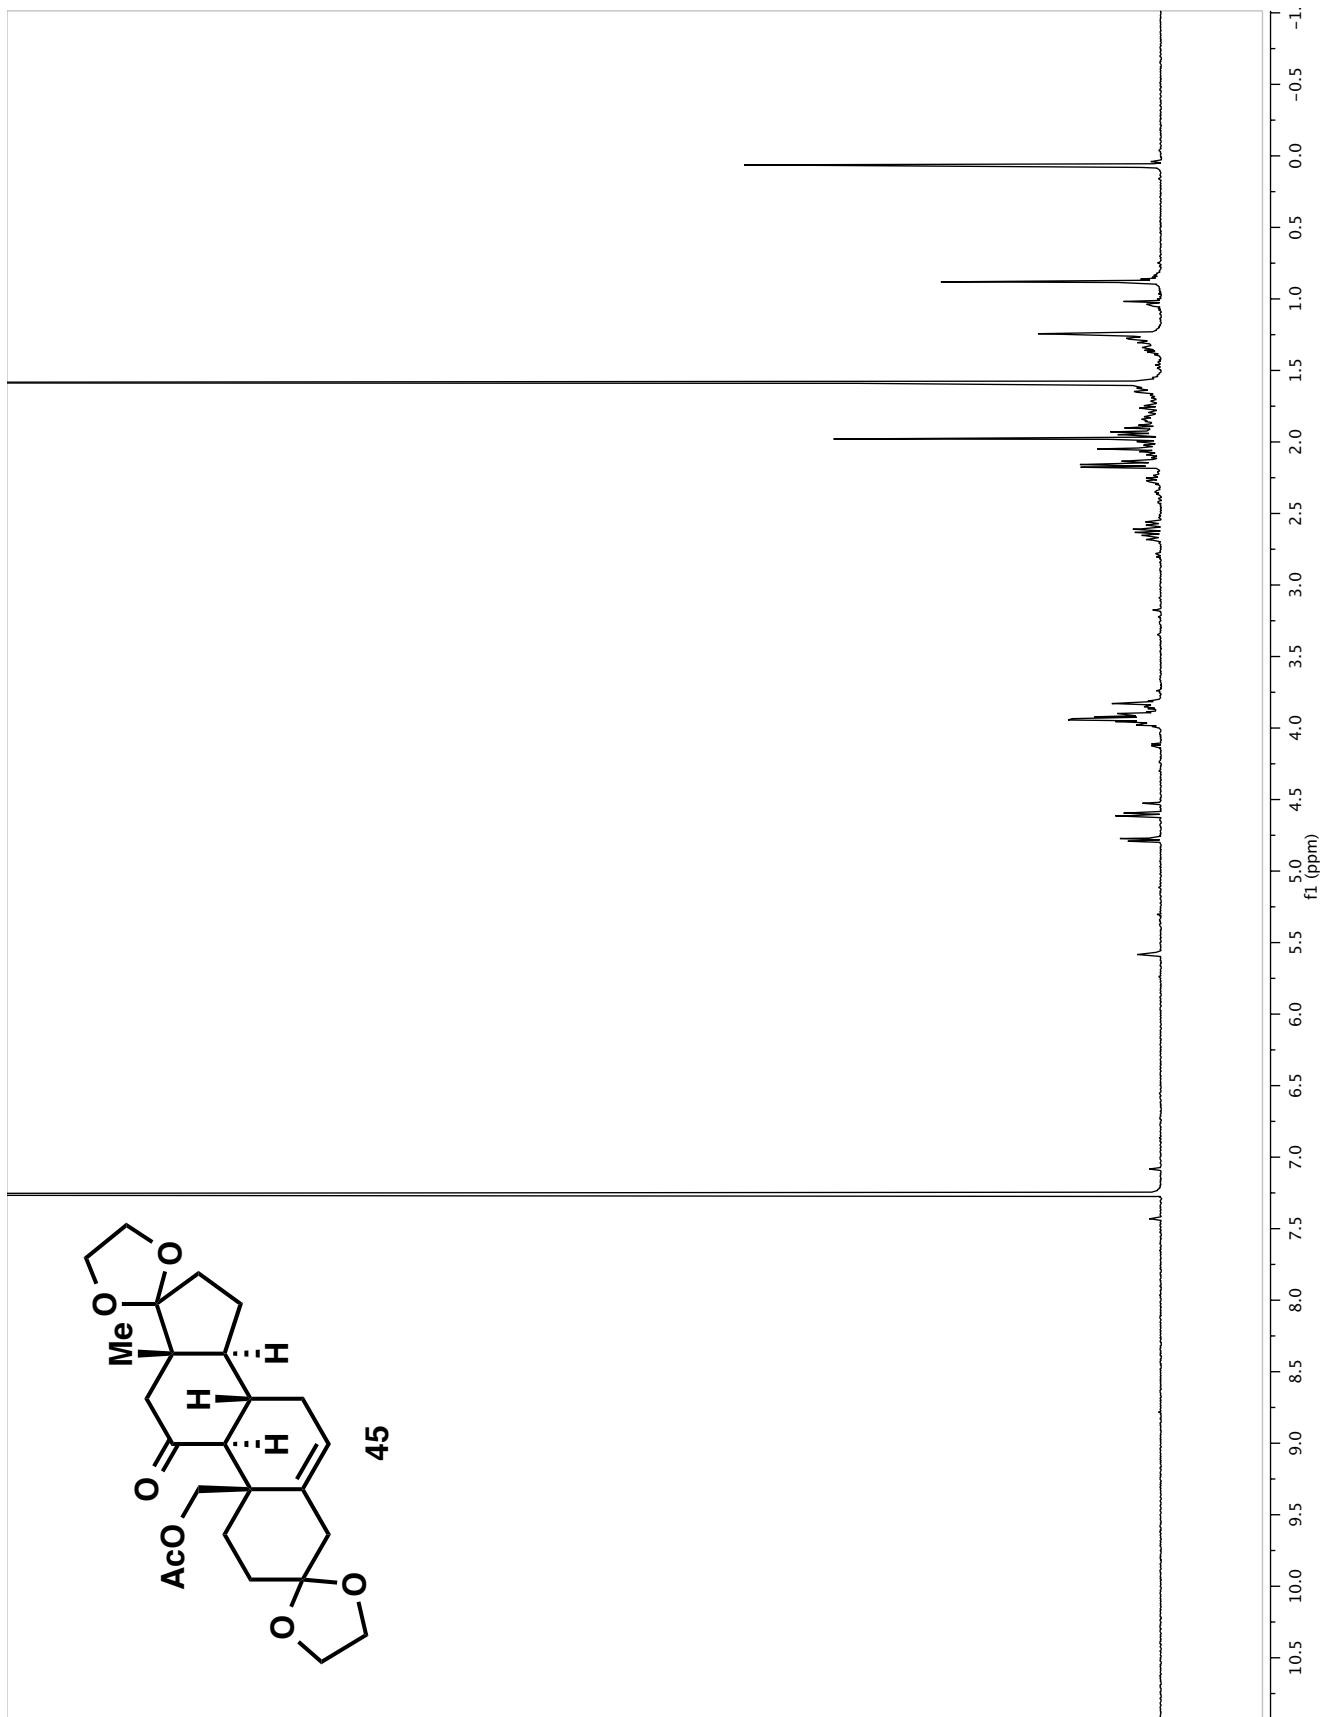

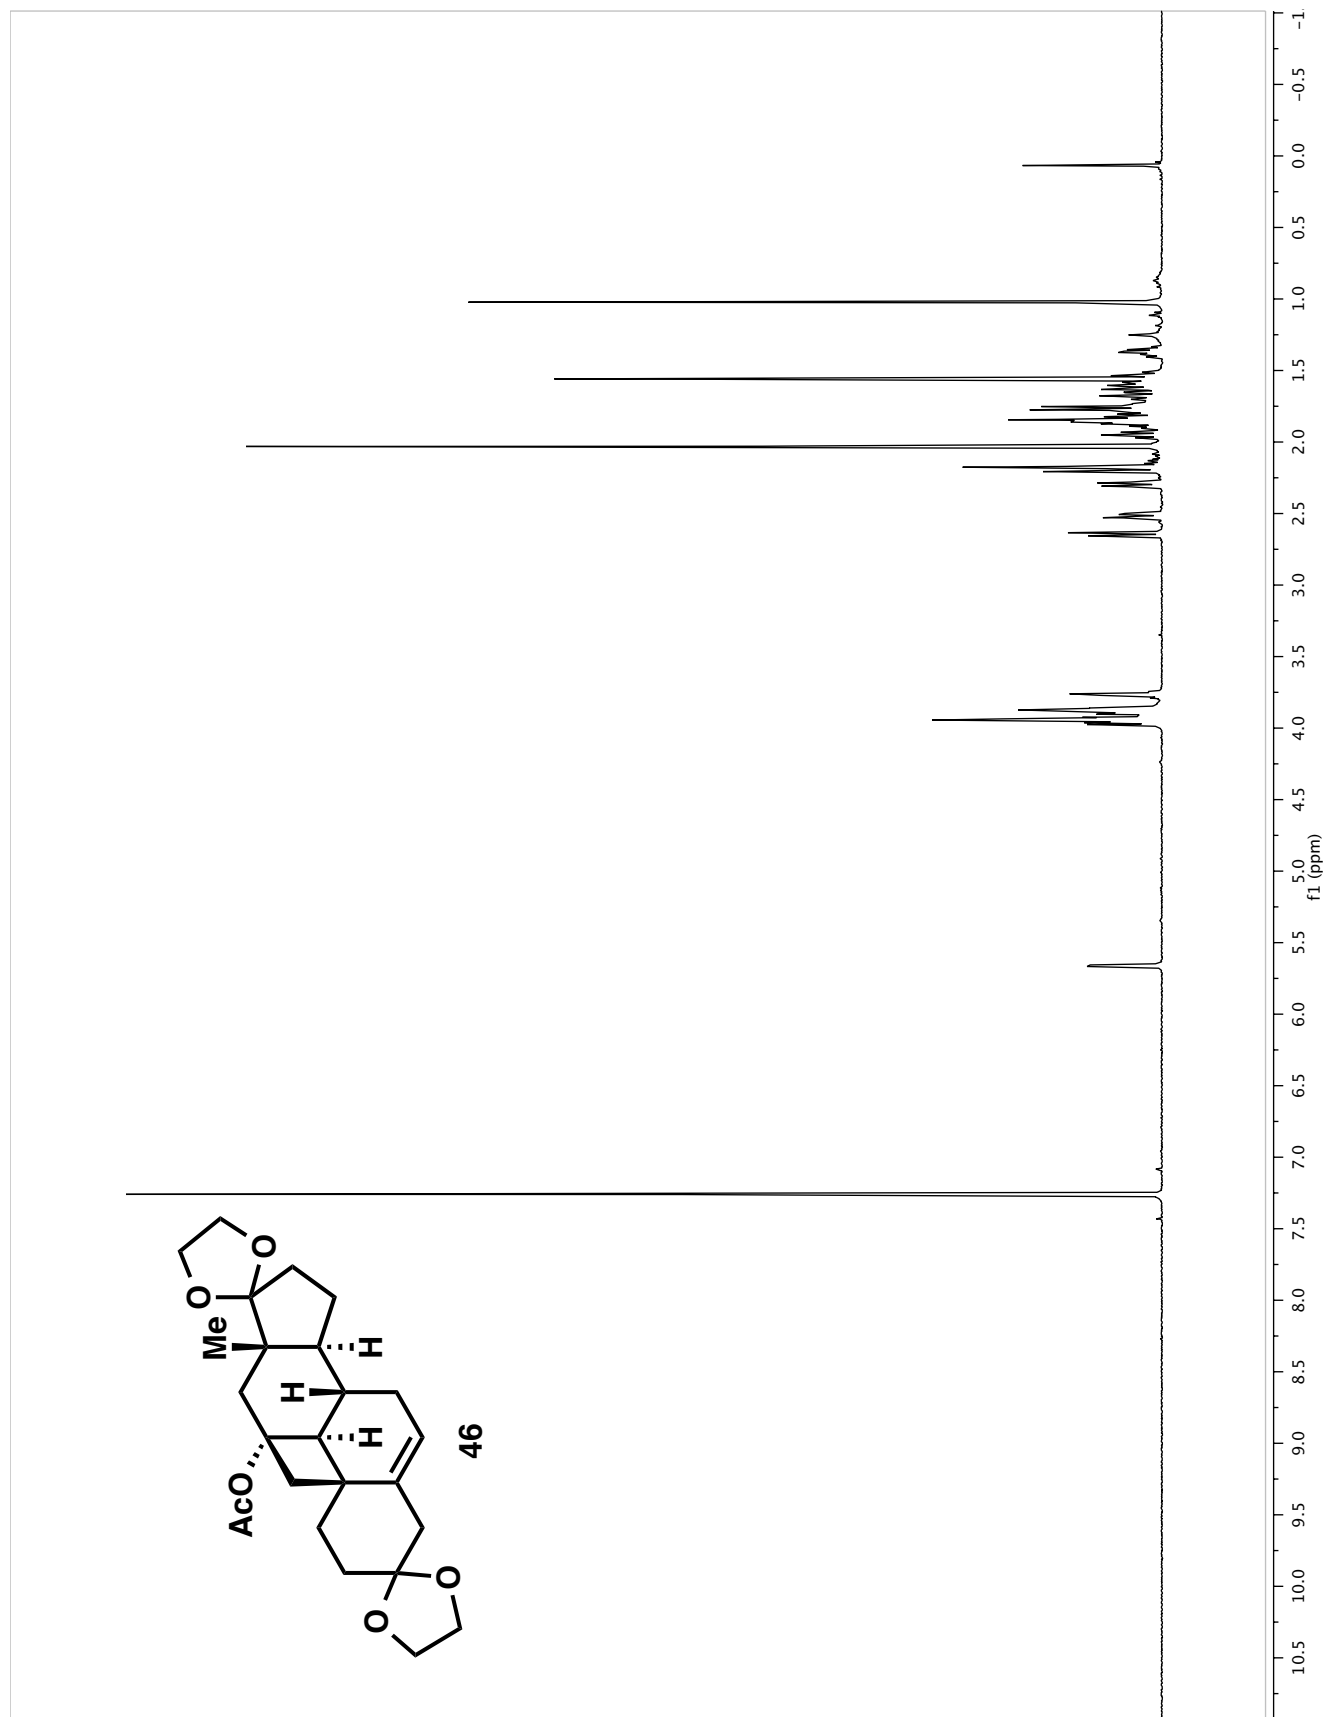

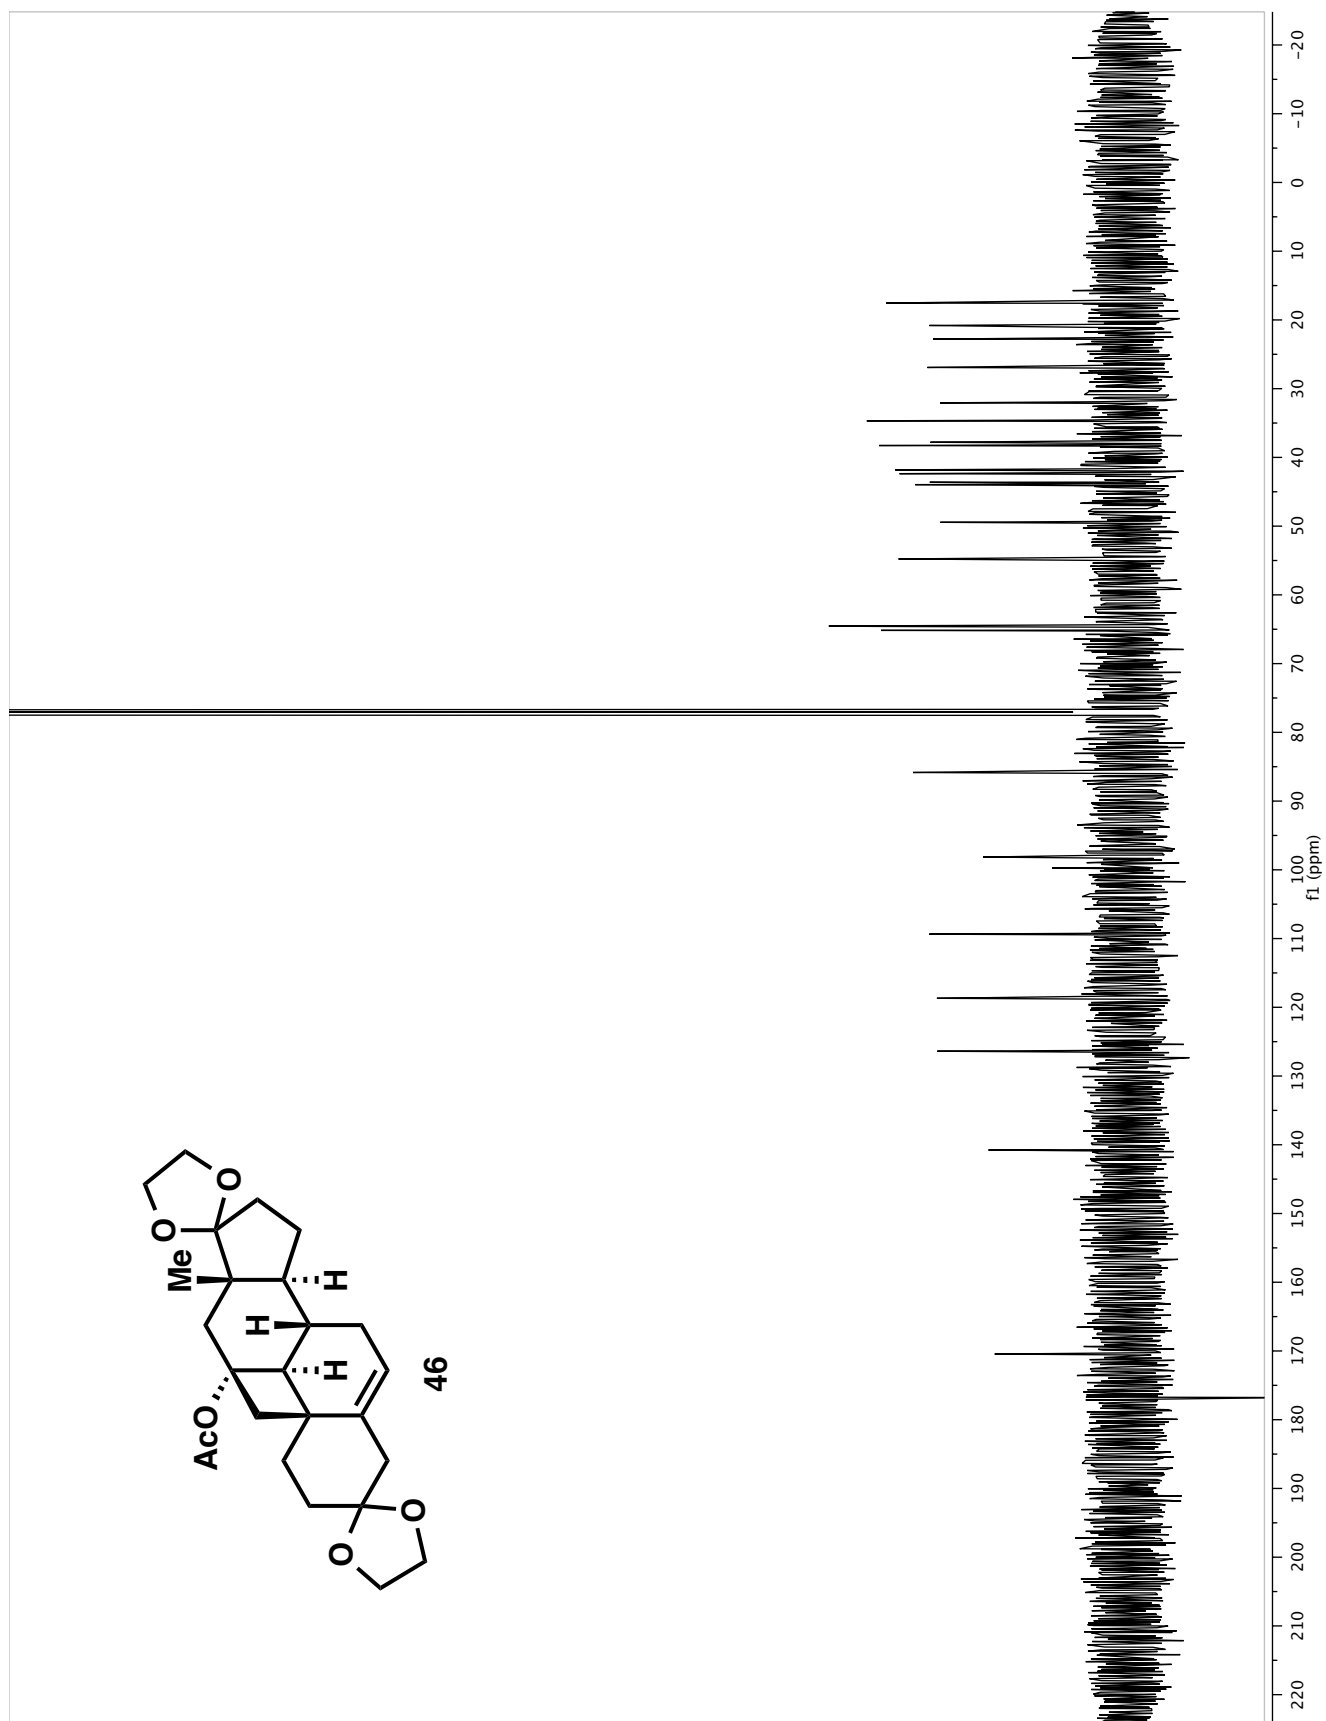

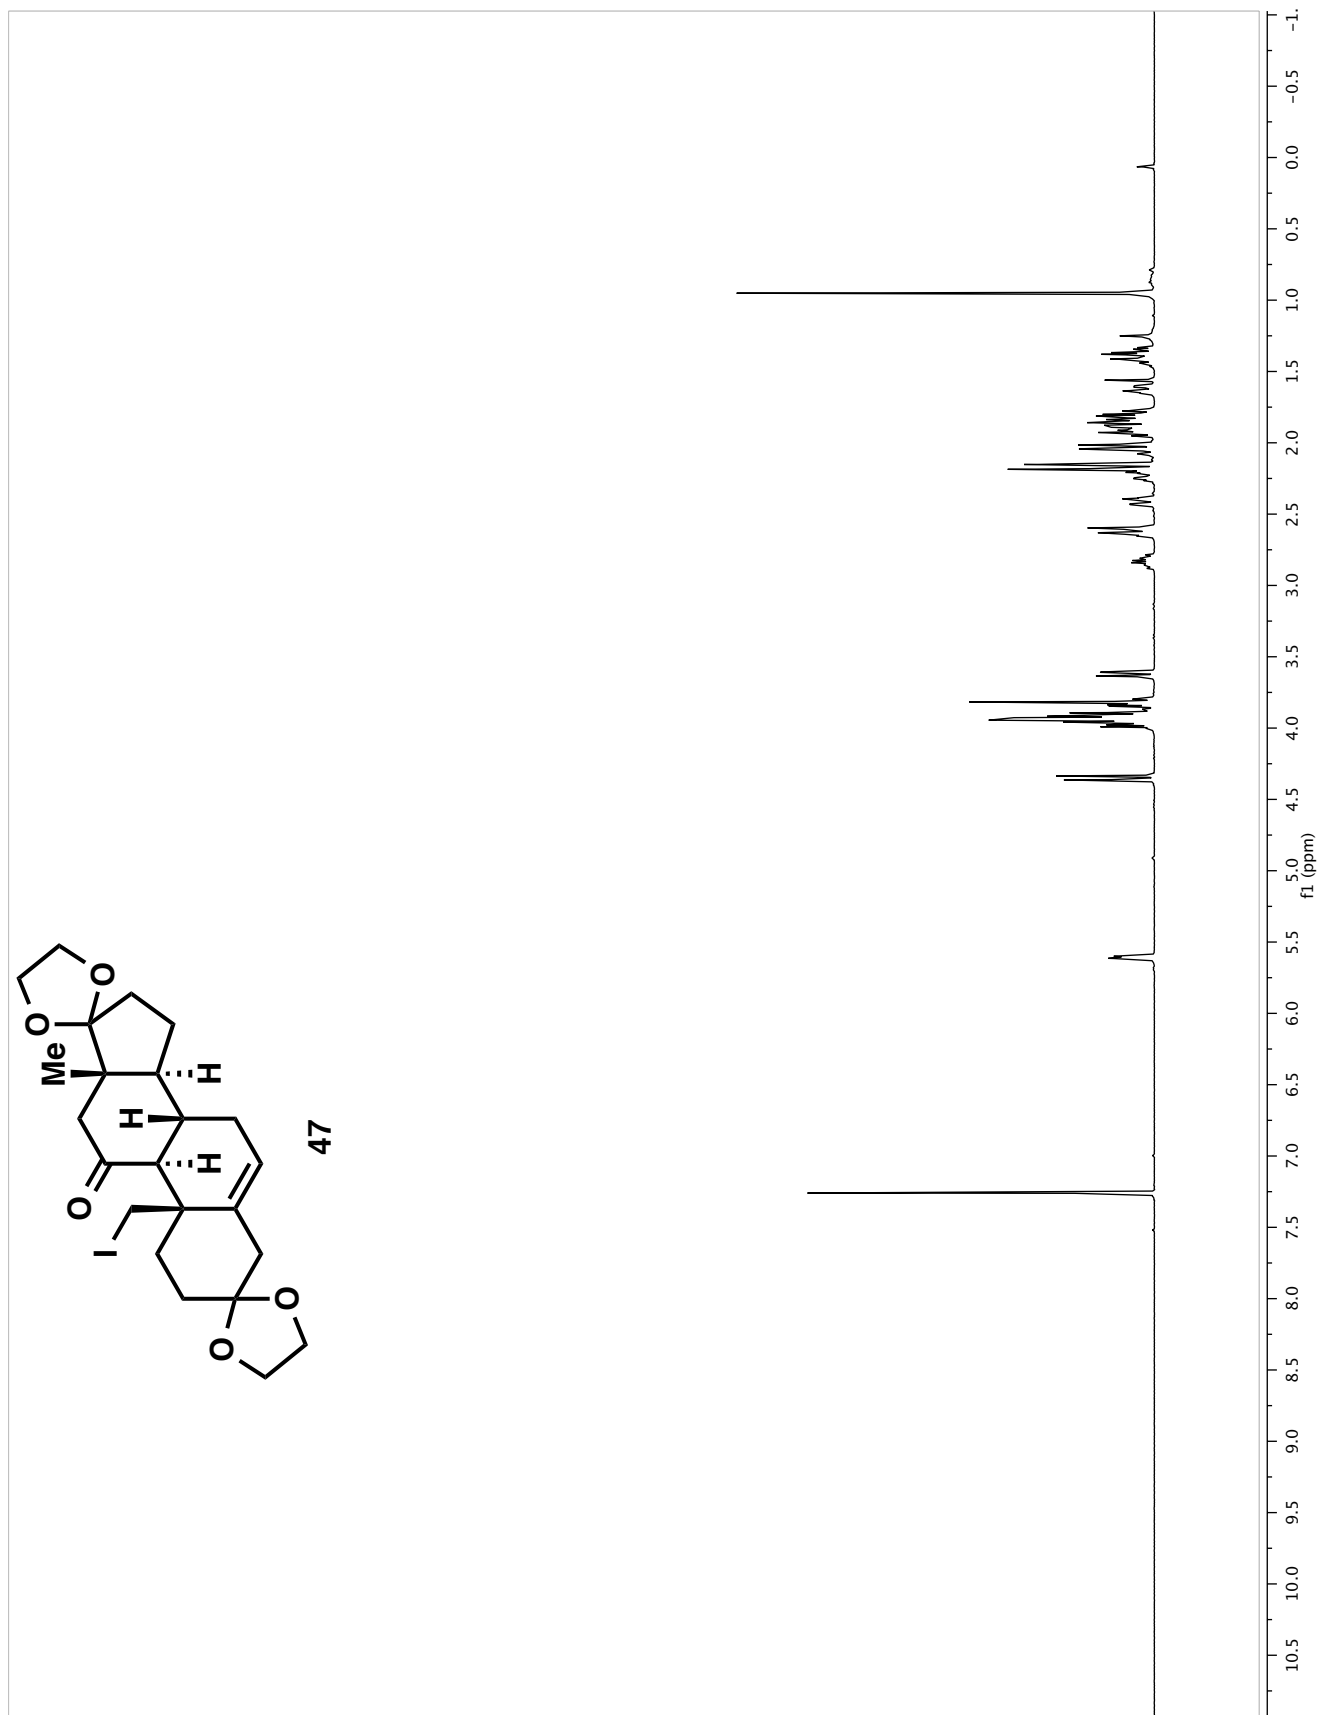

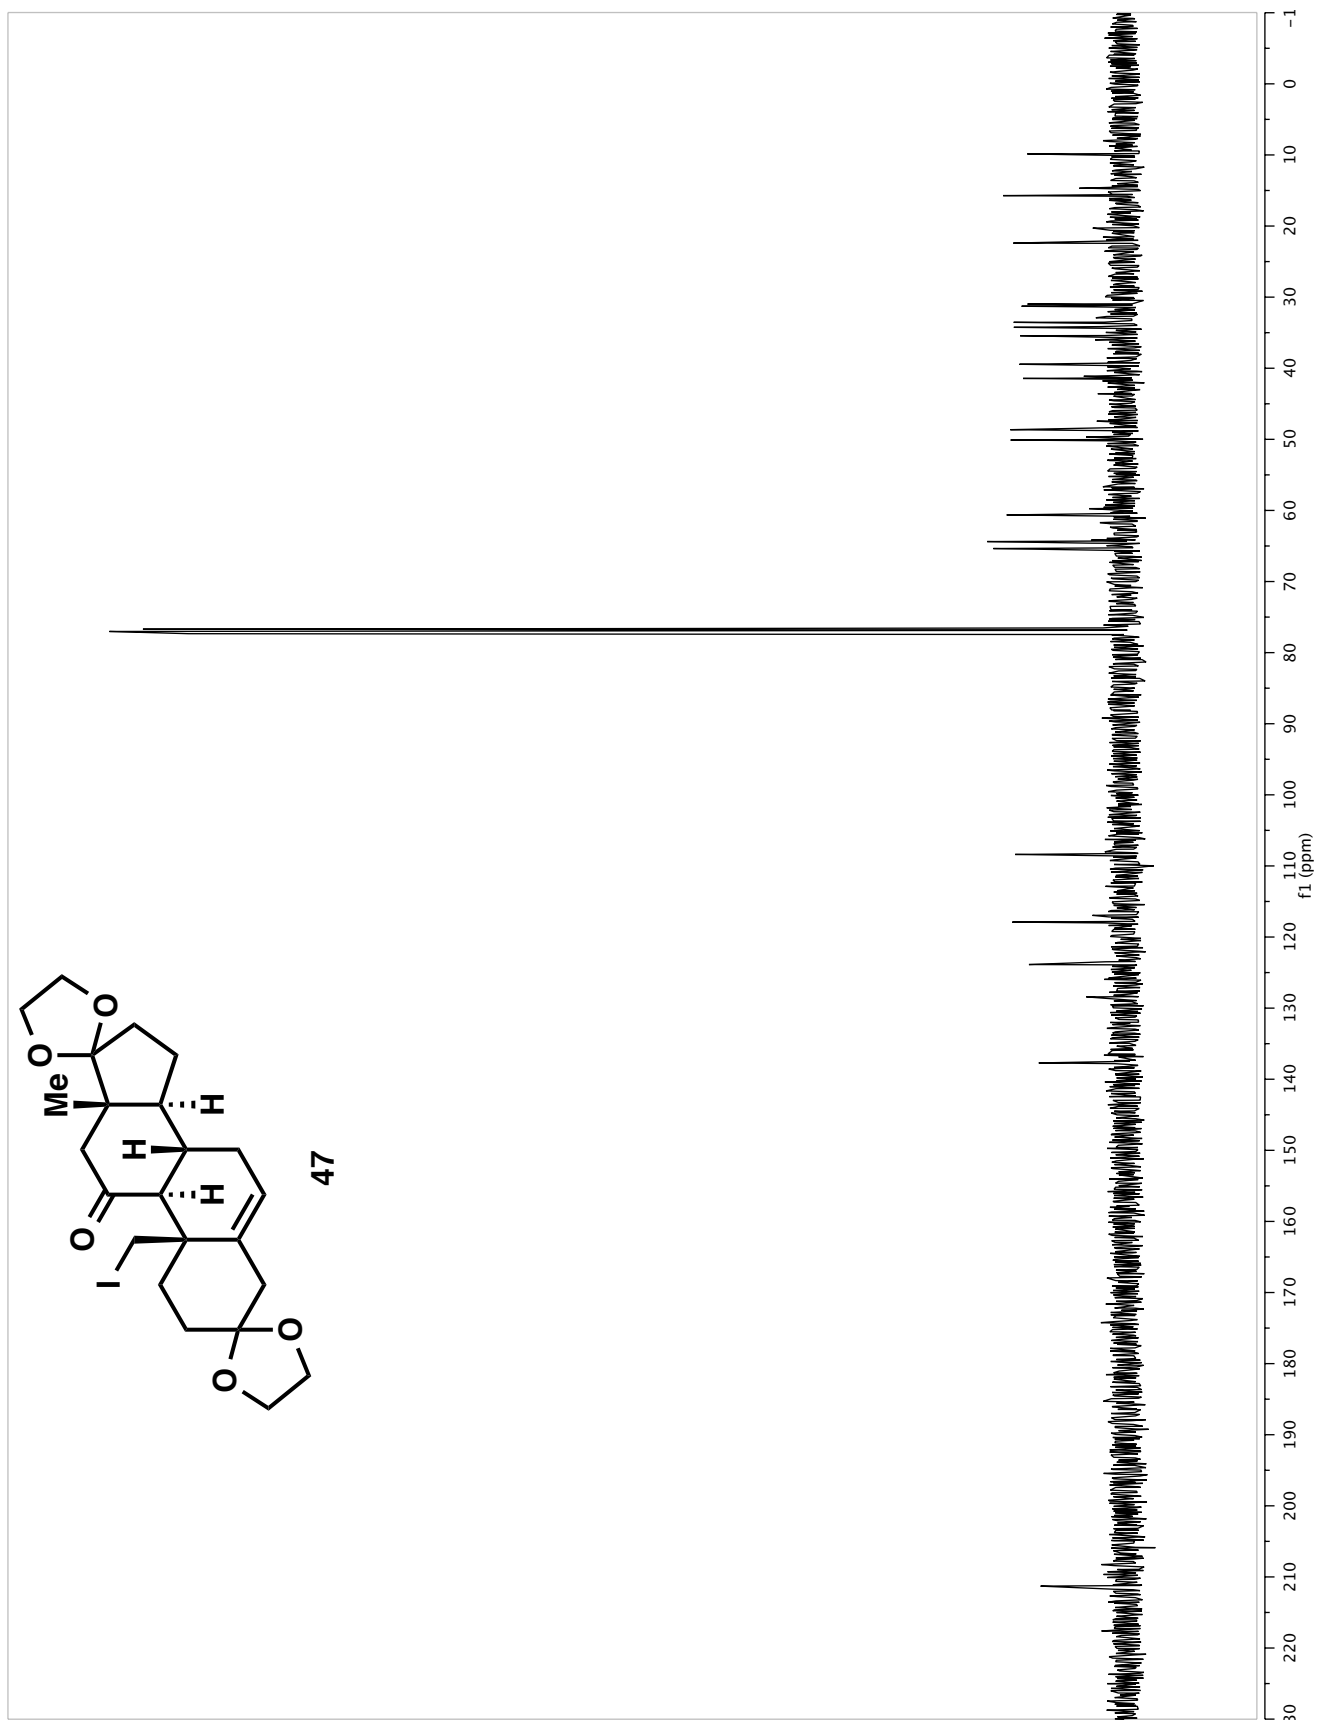

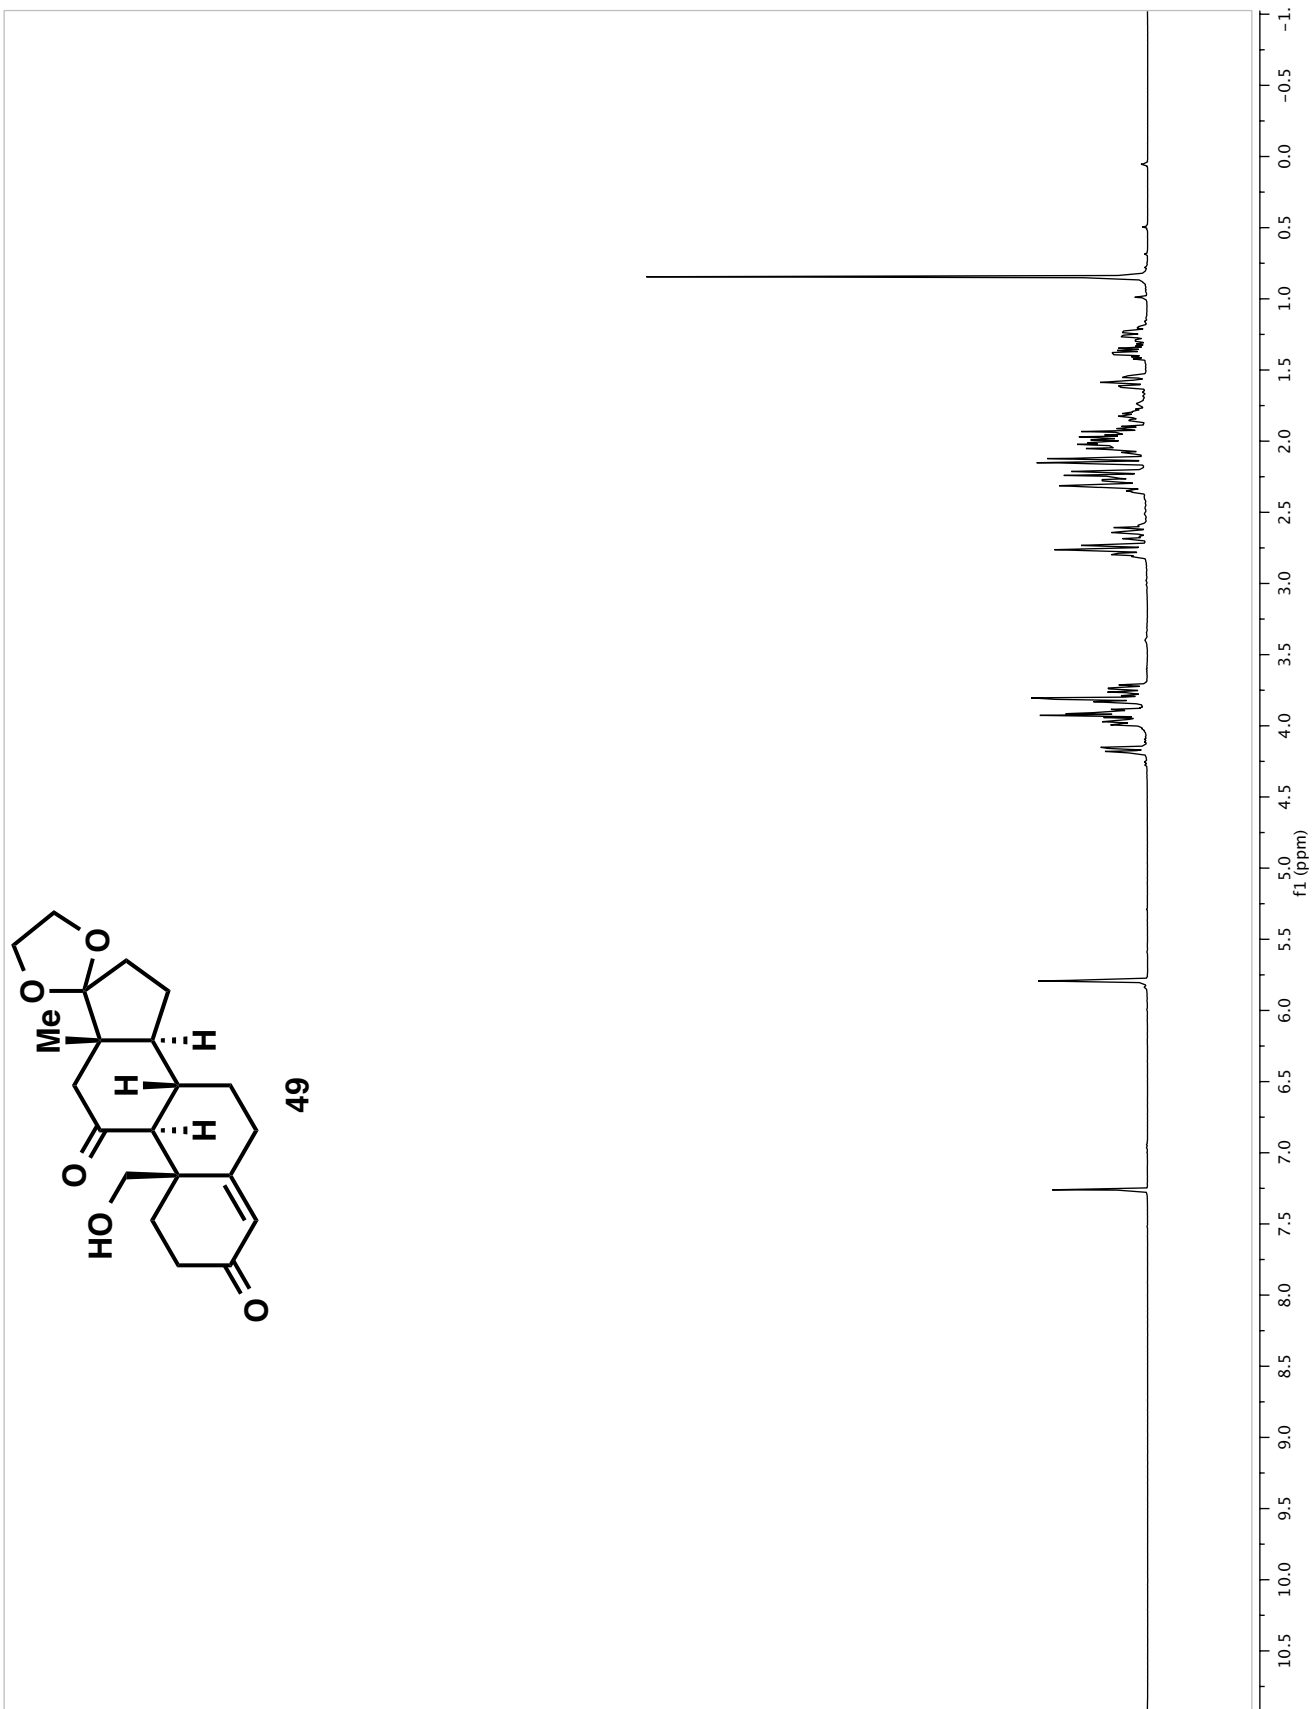

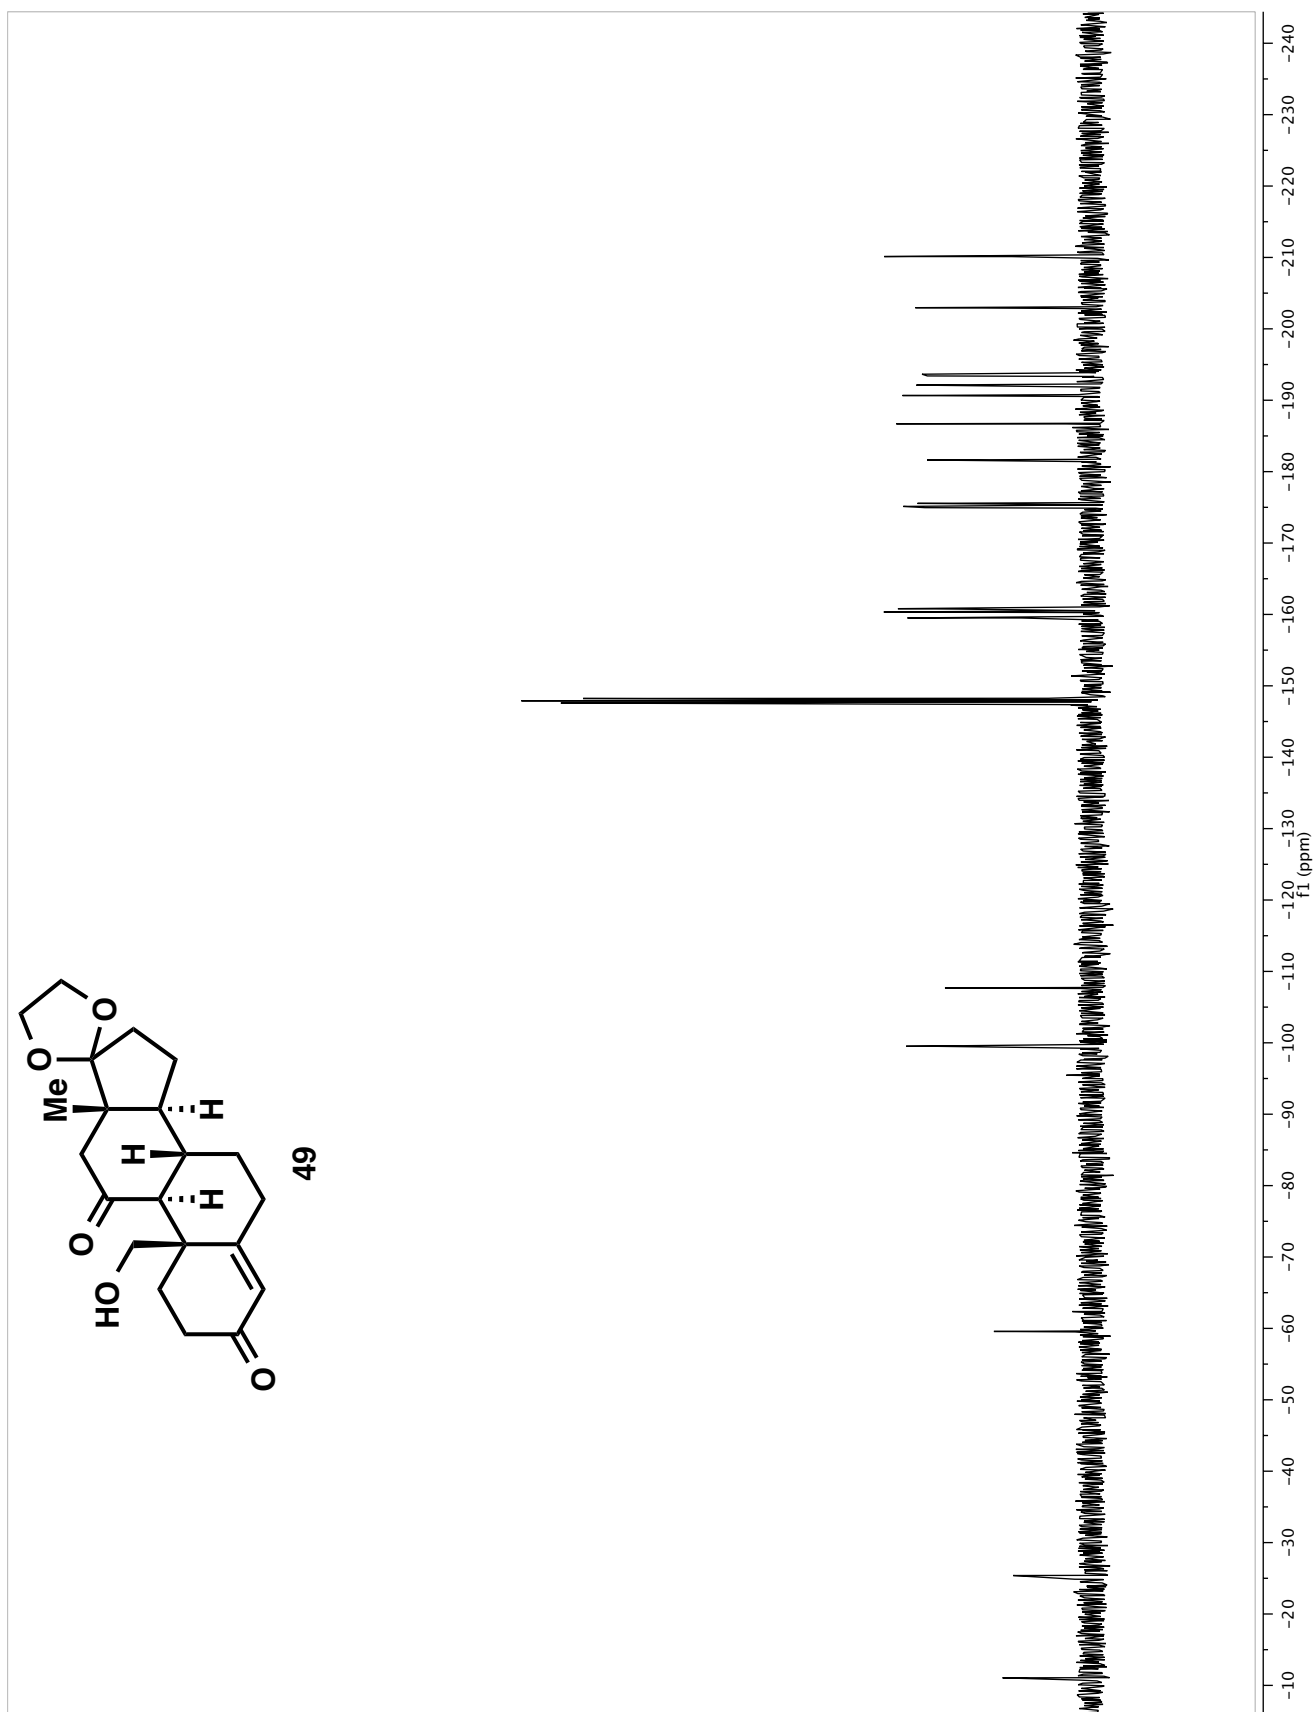

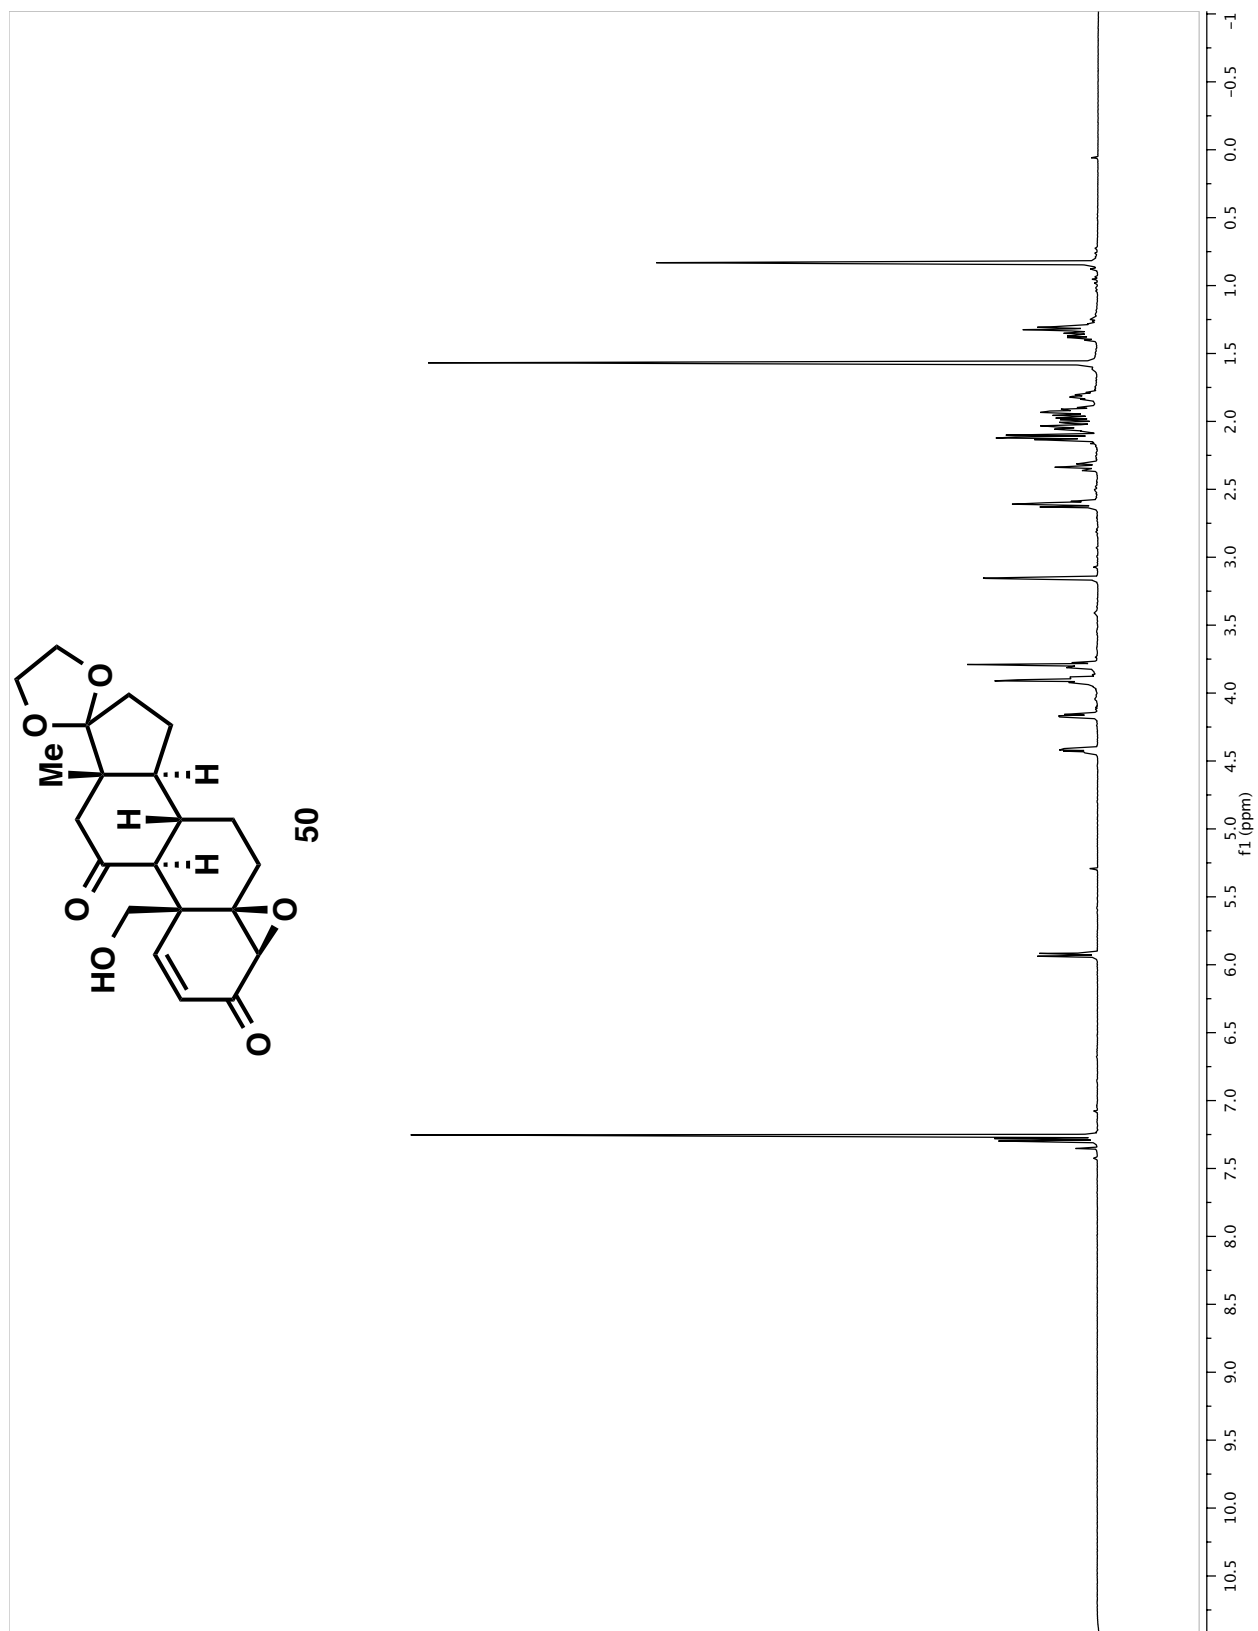



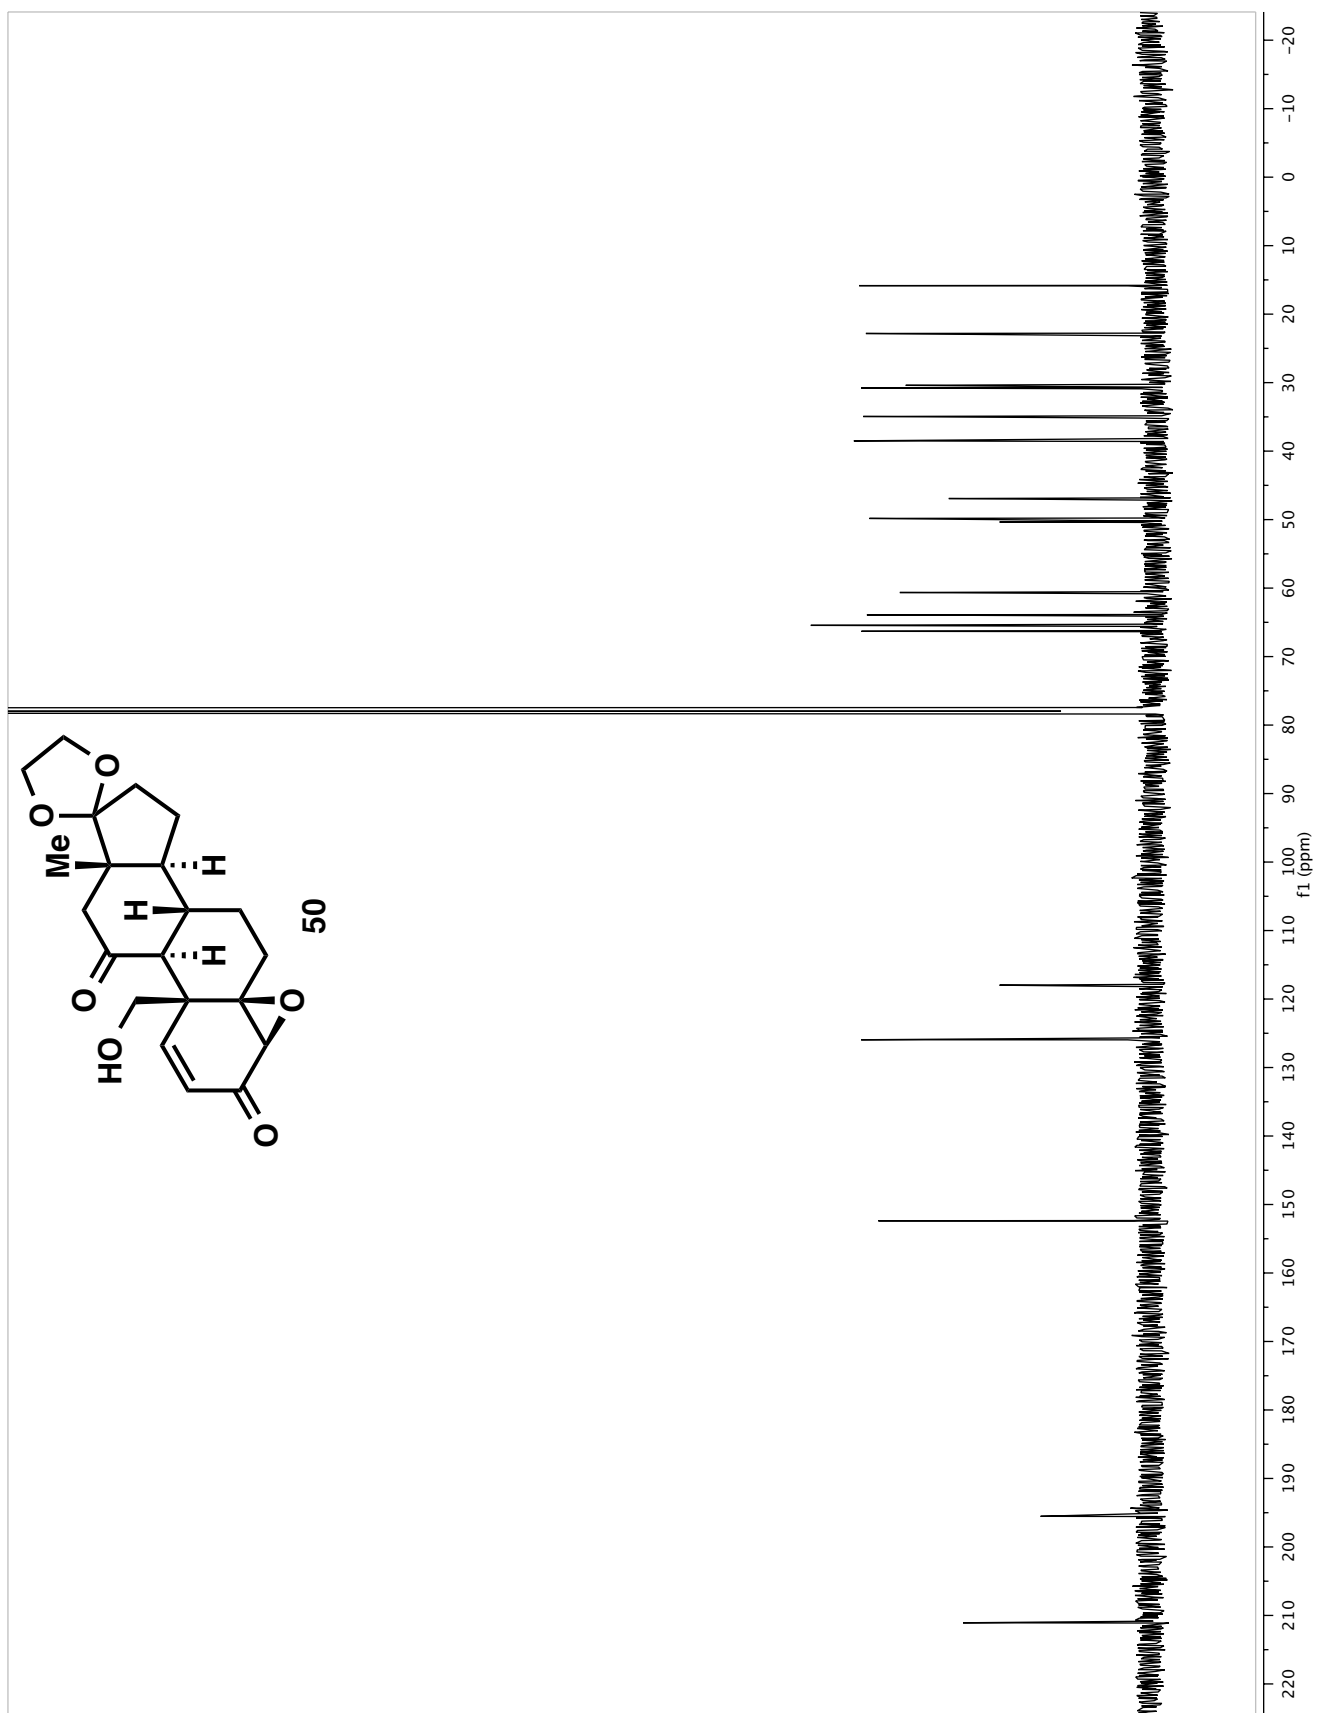

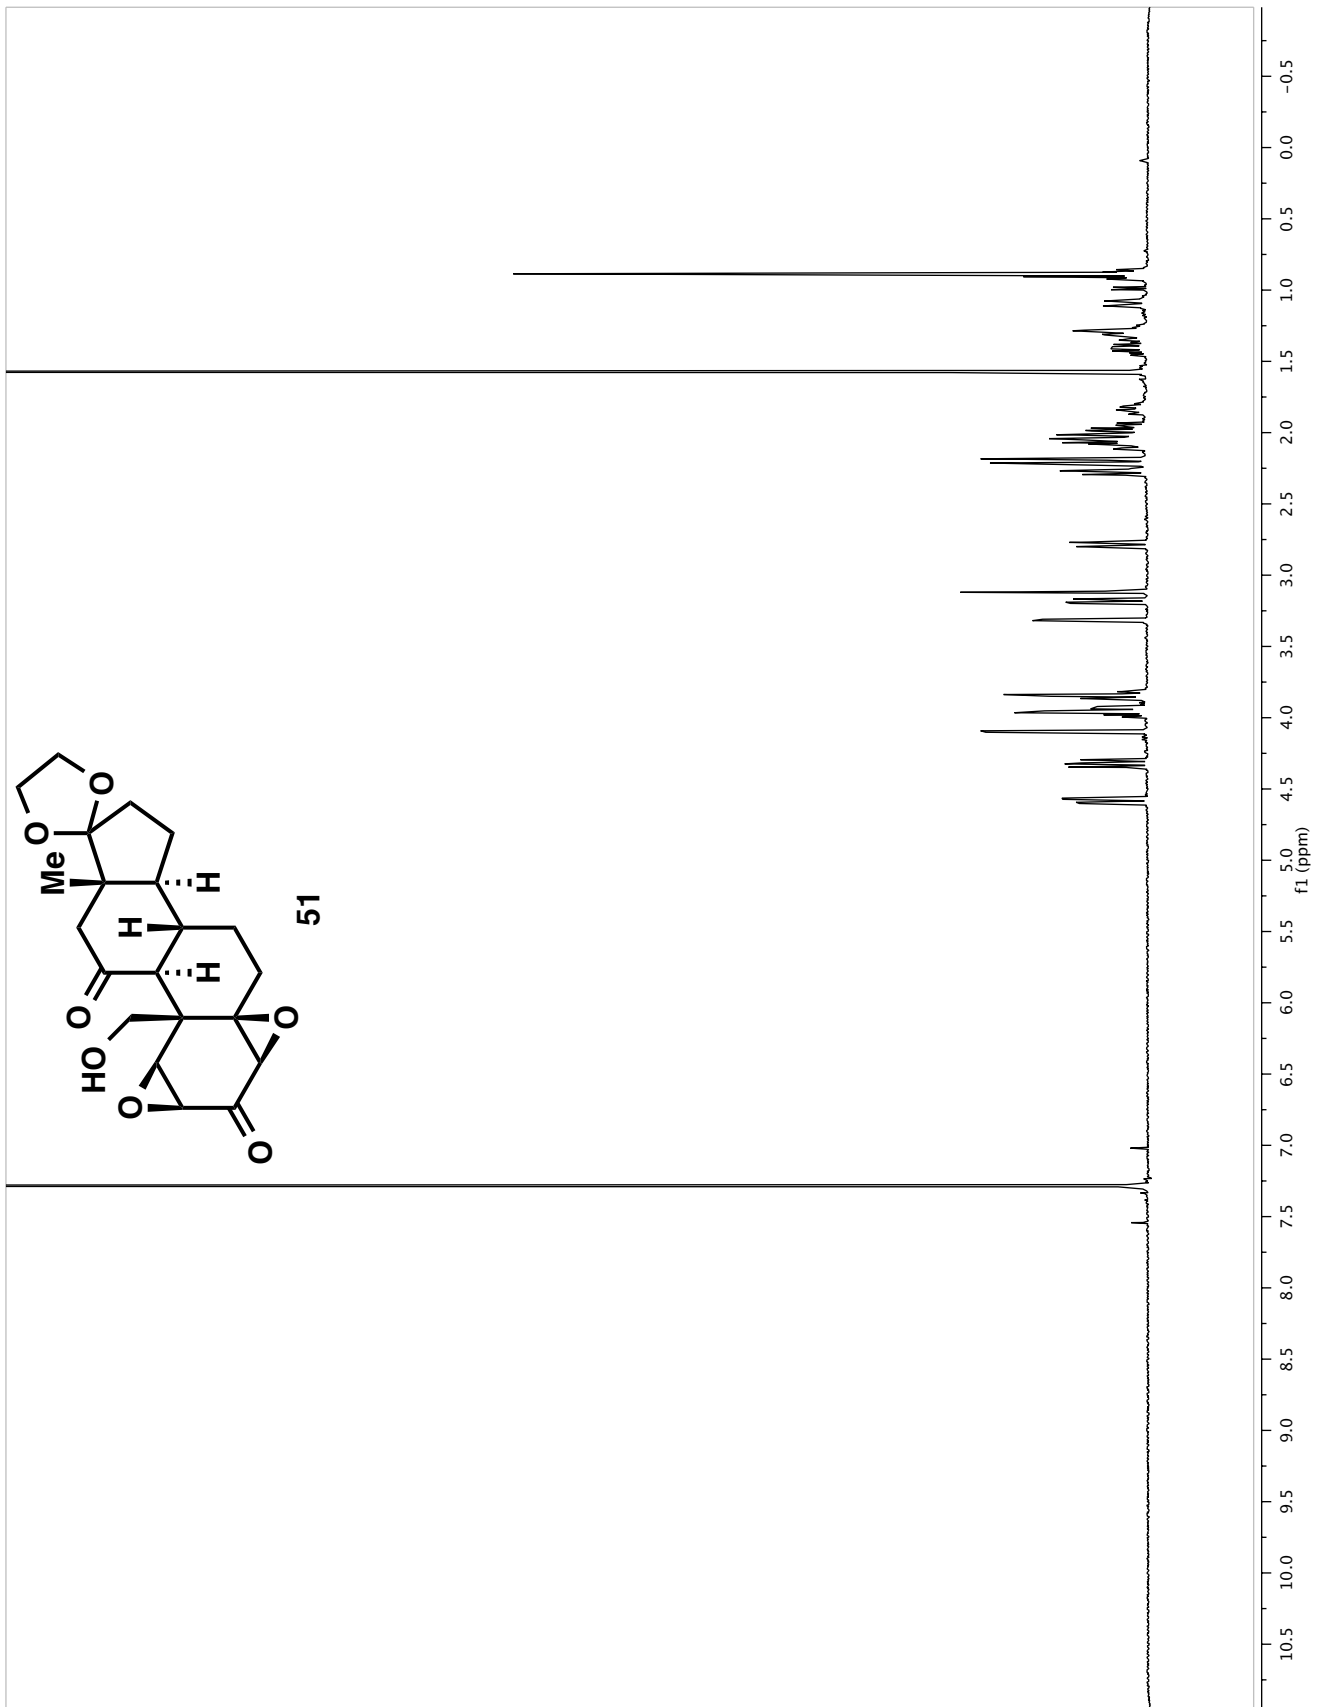

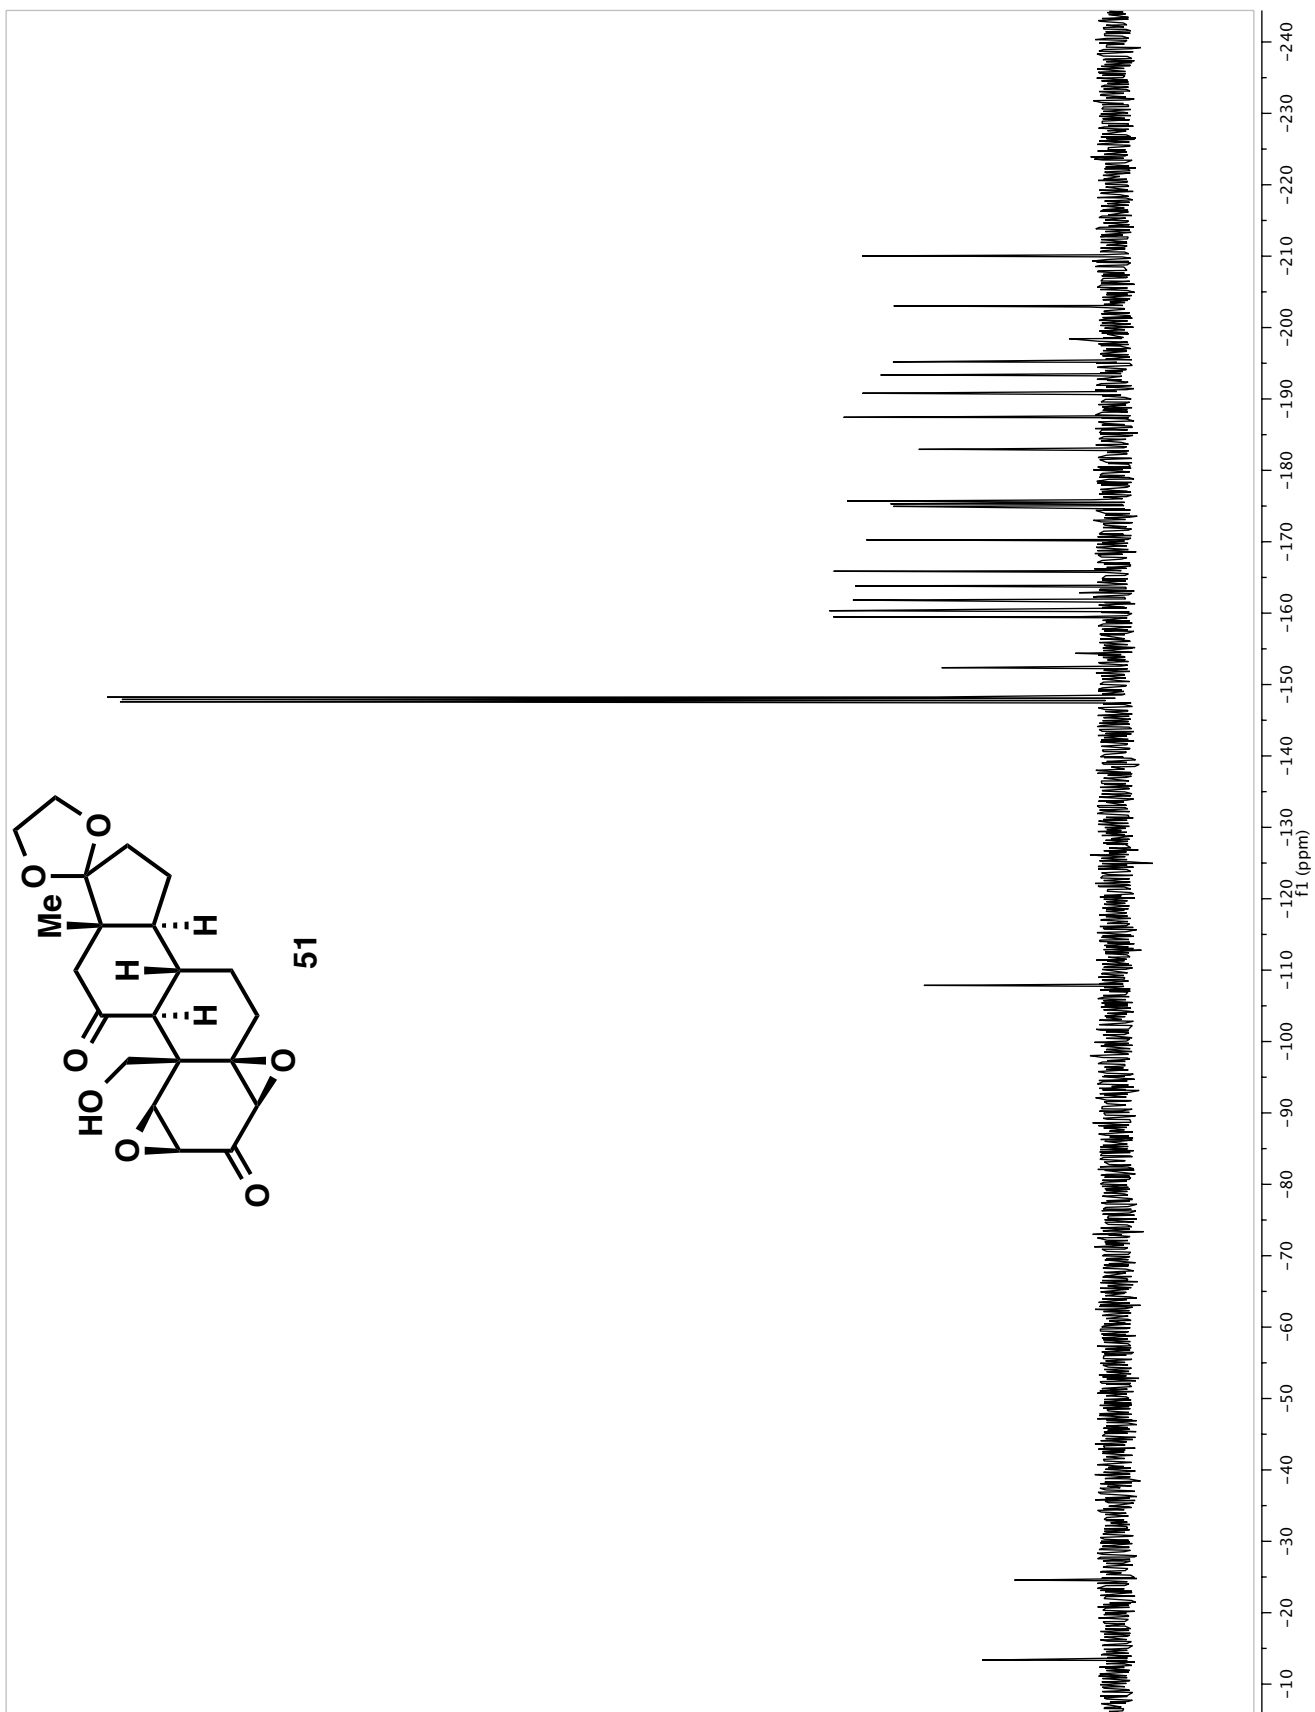

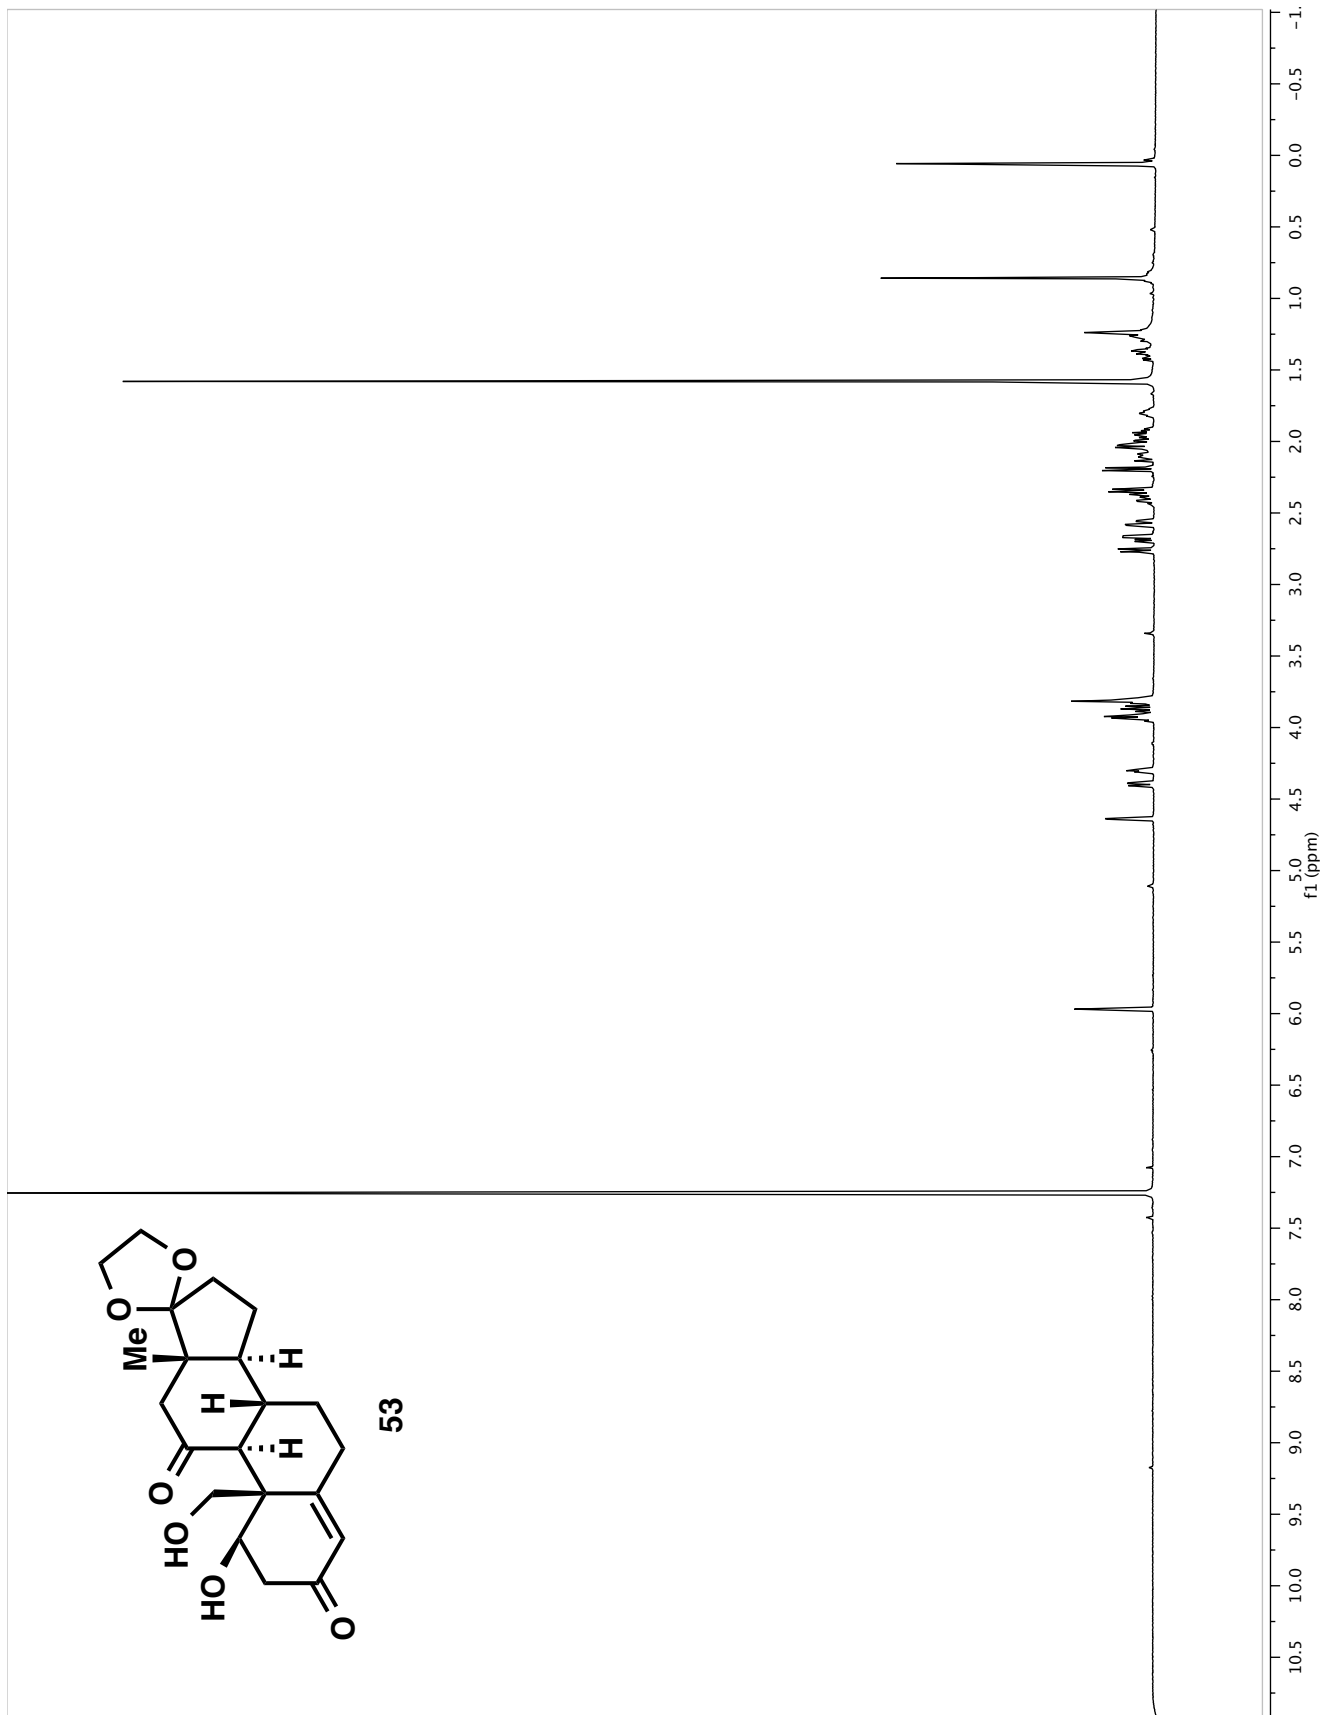

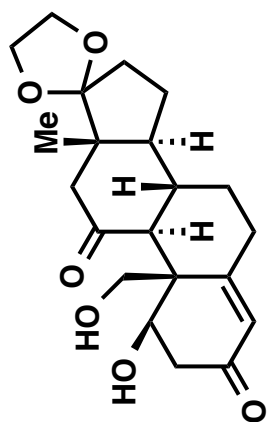

53

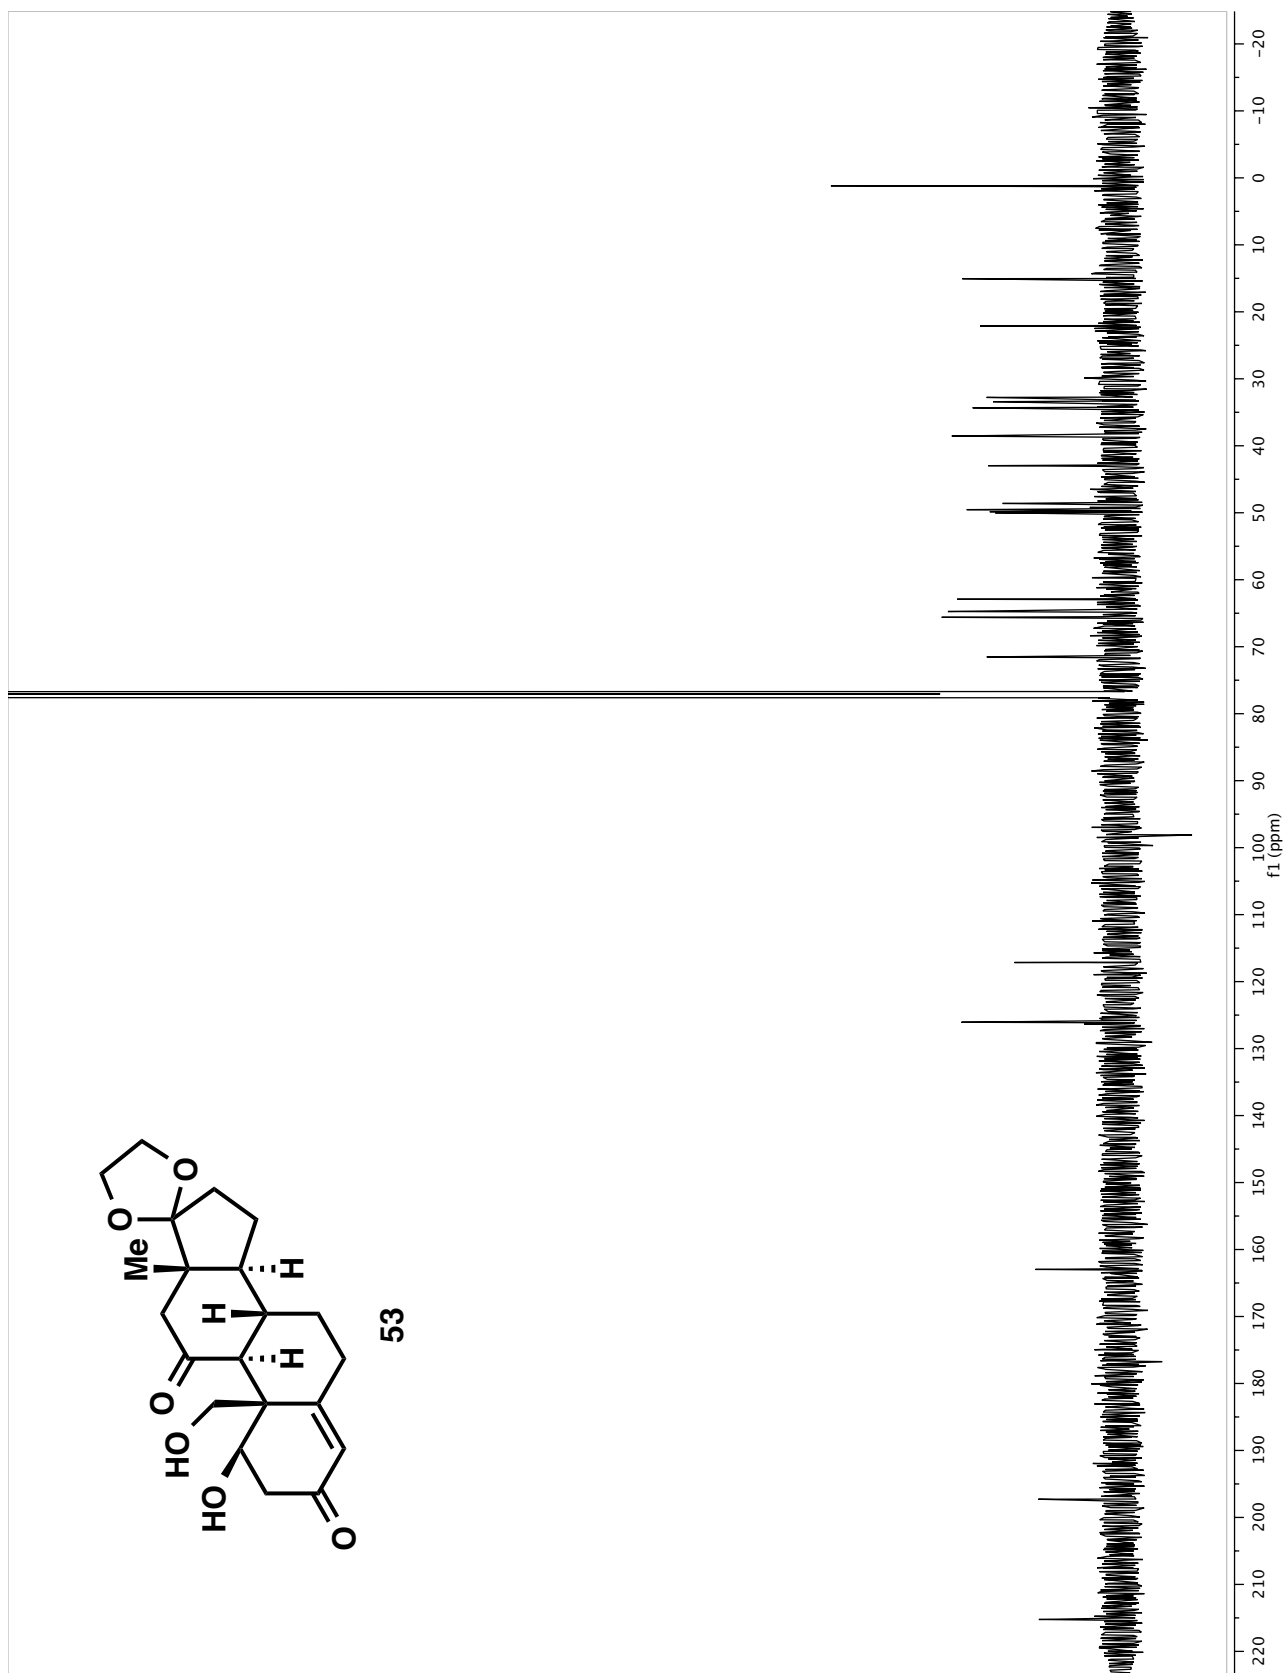

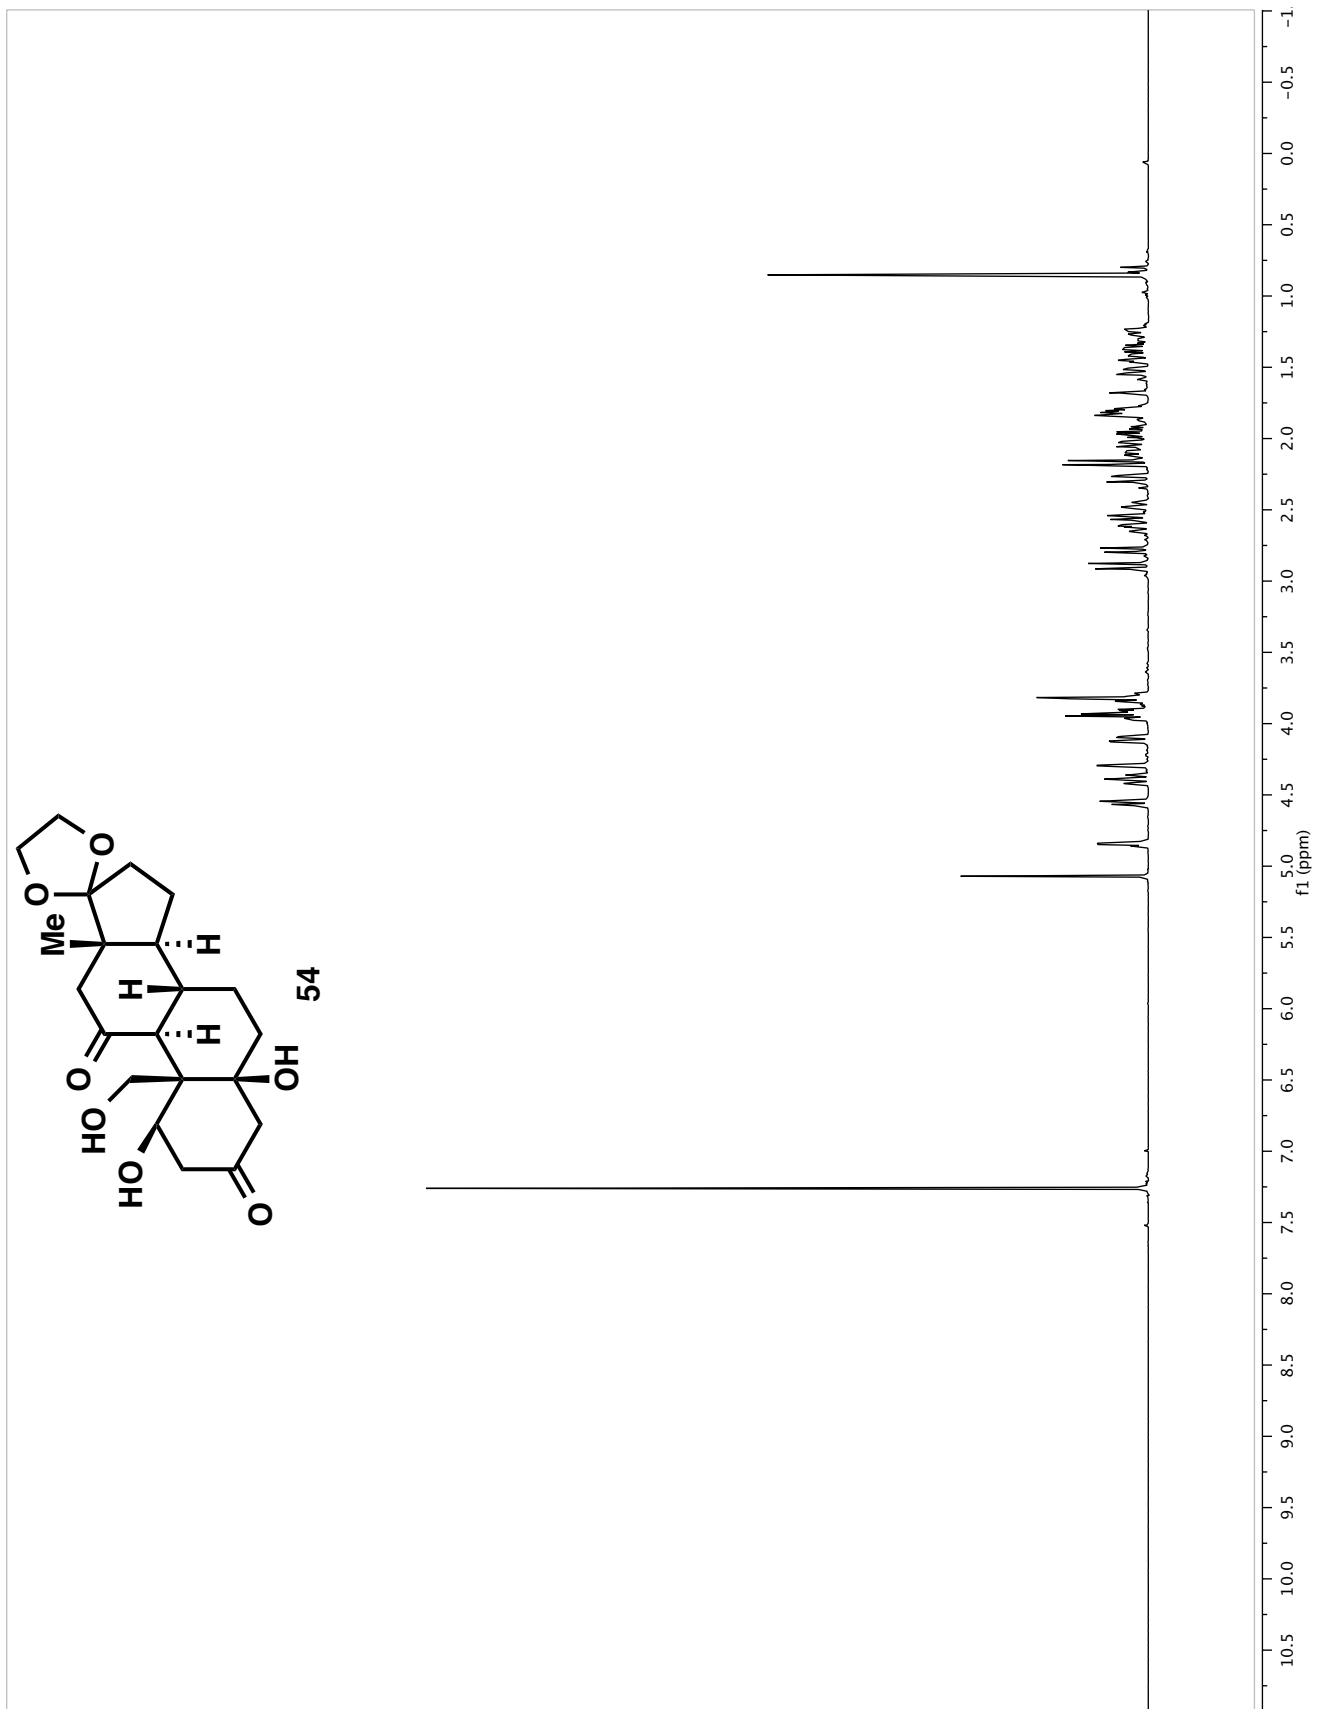

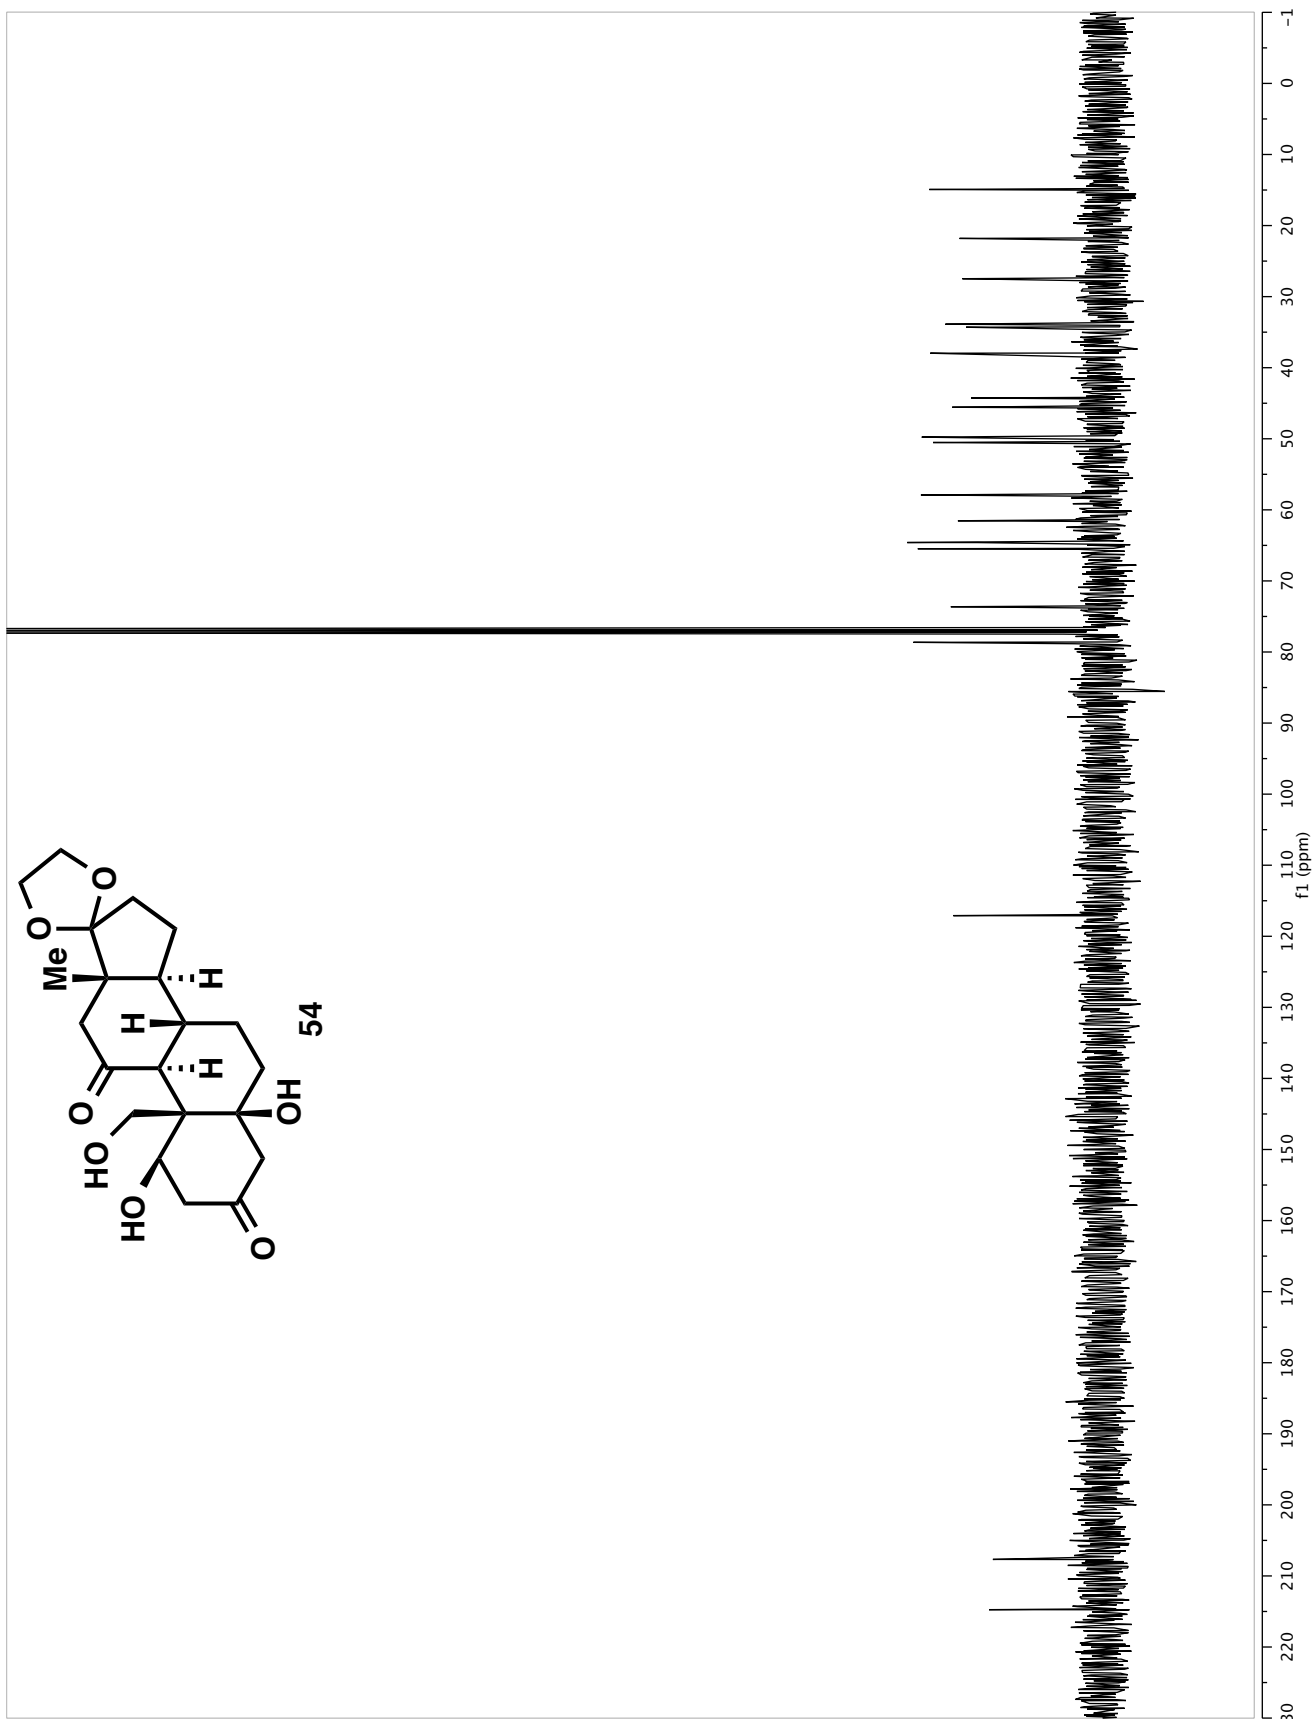

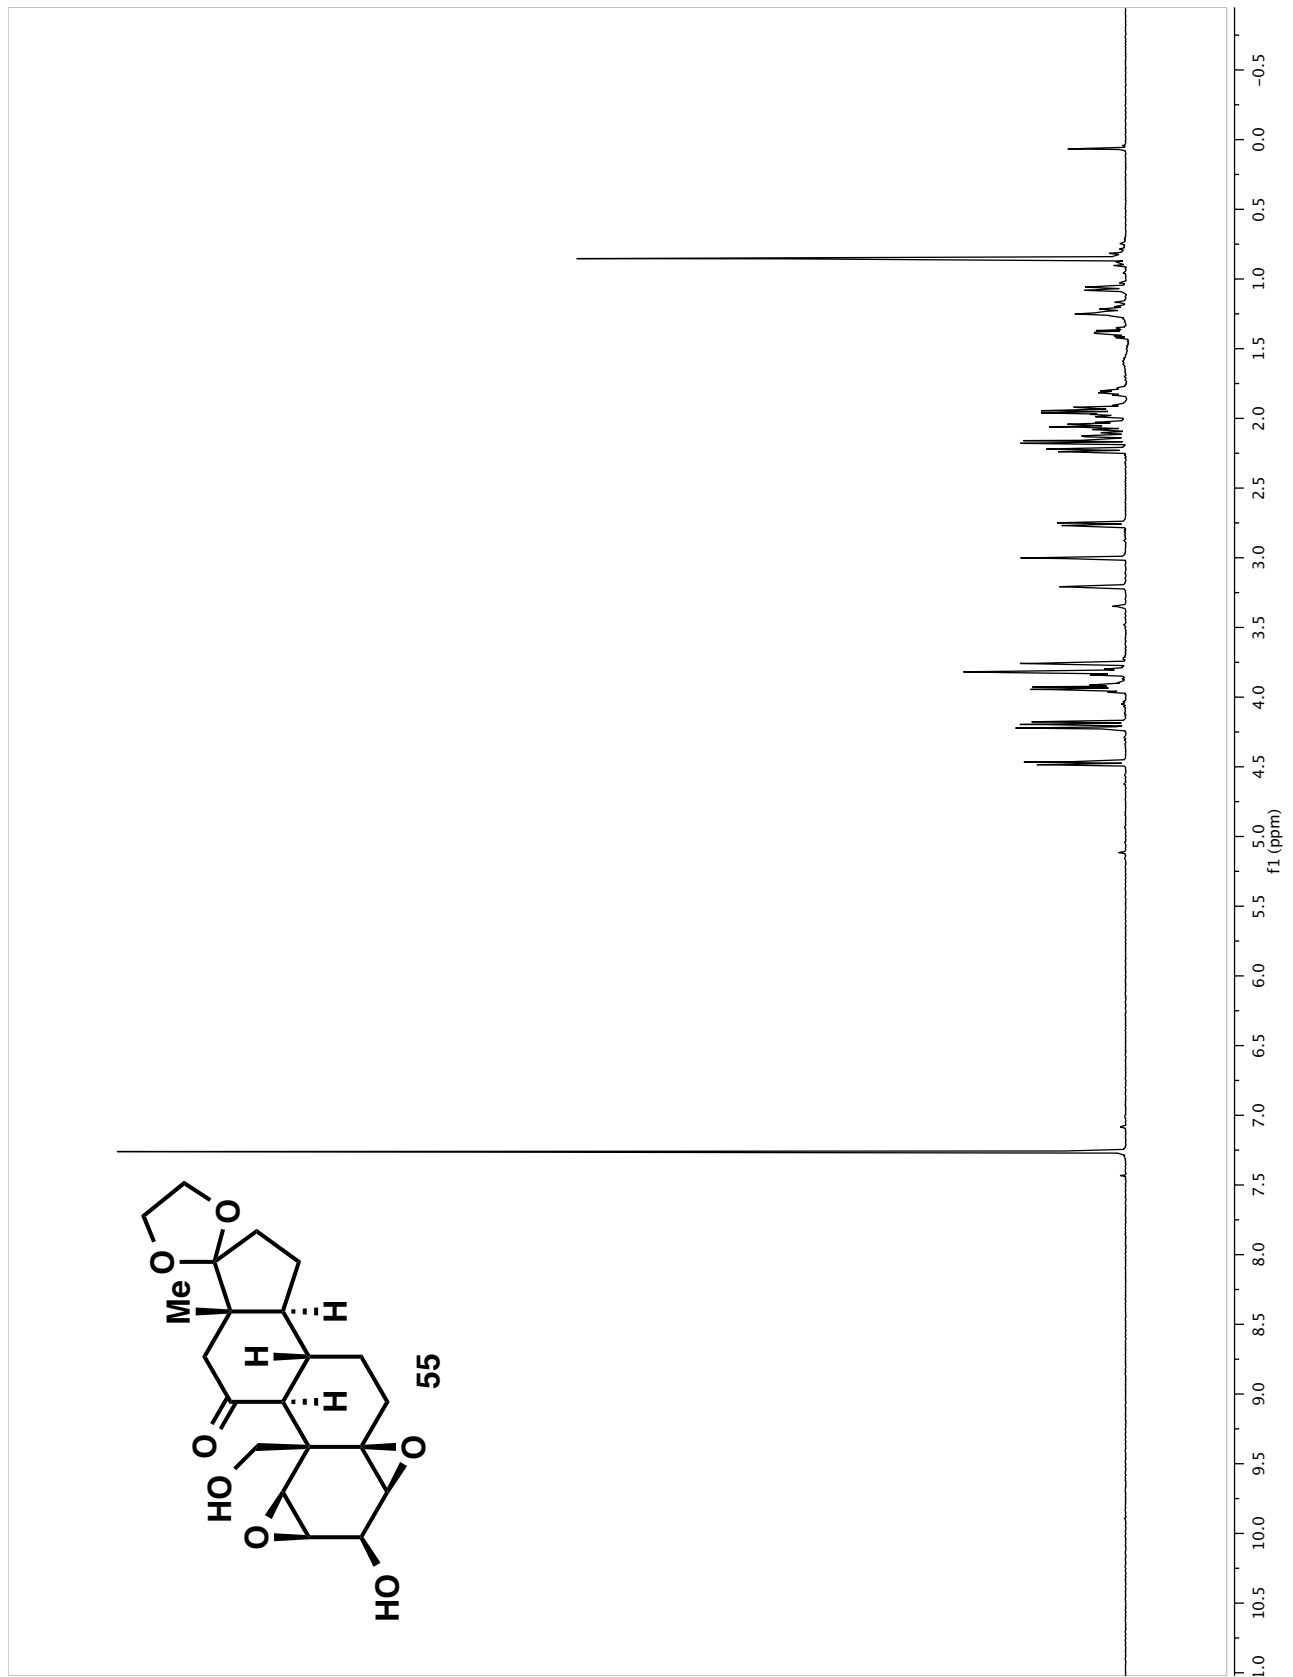



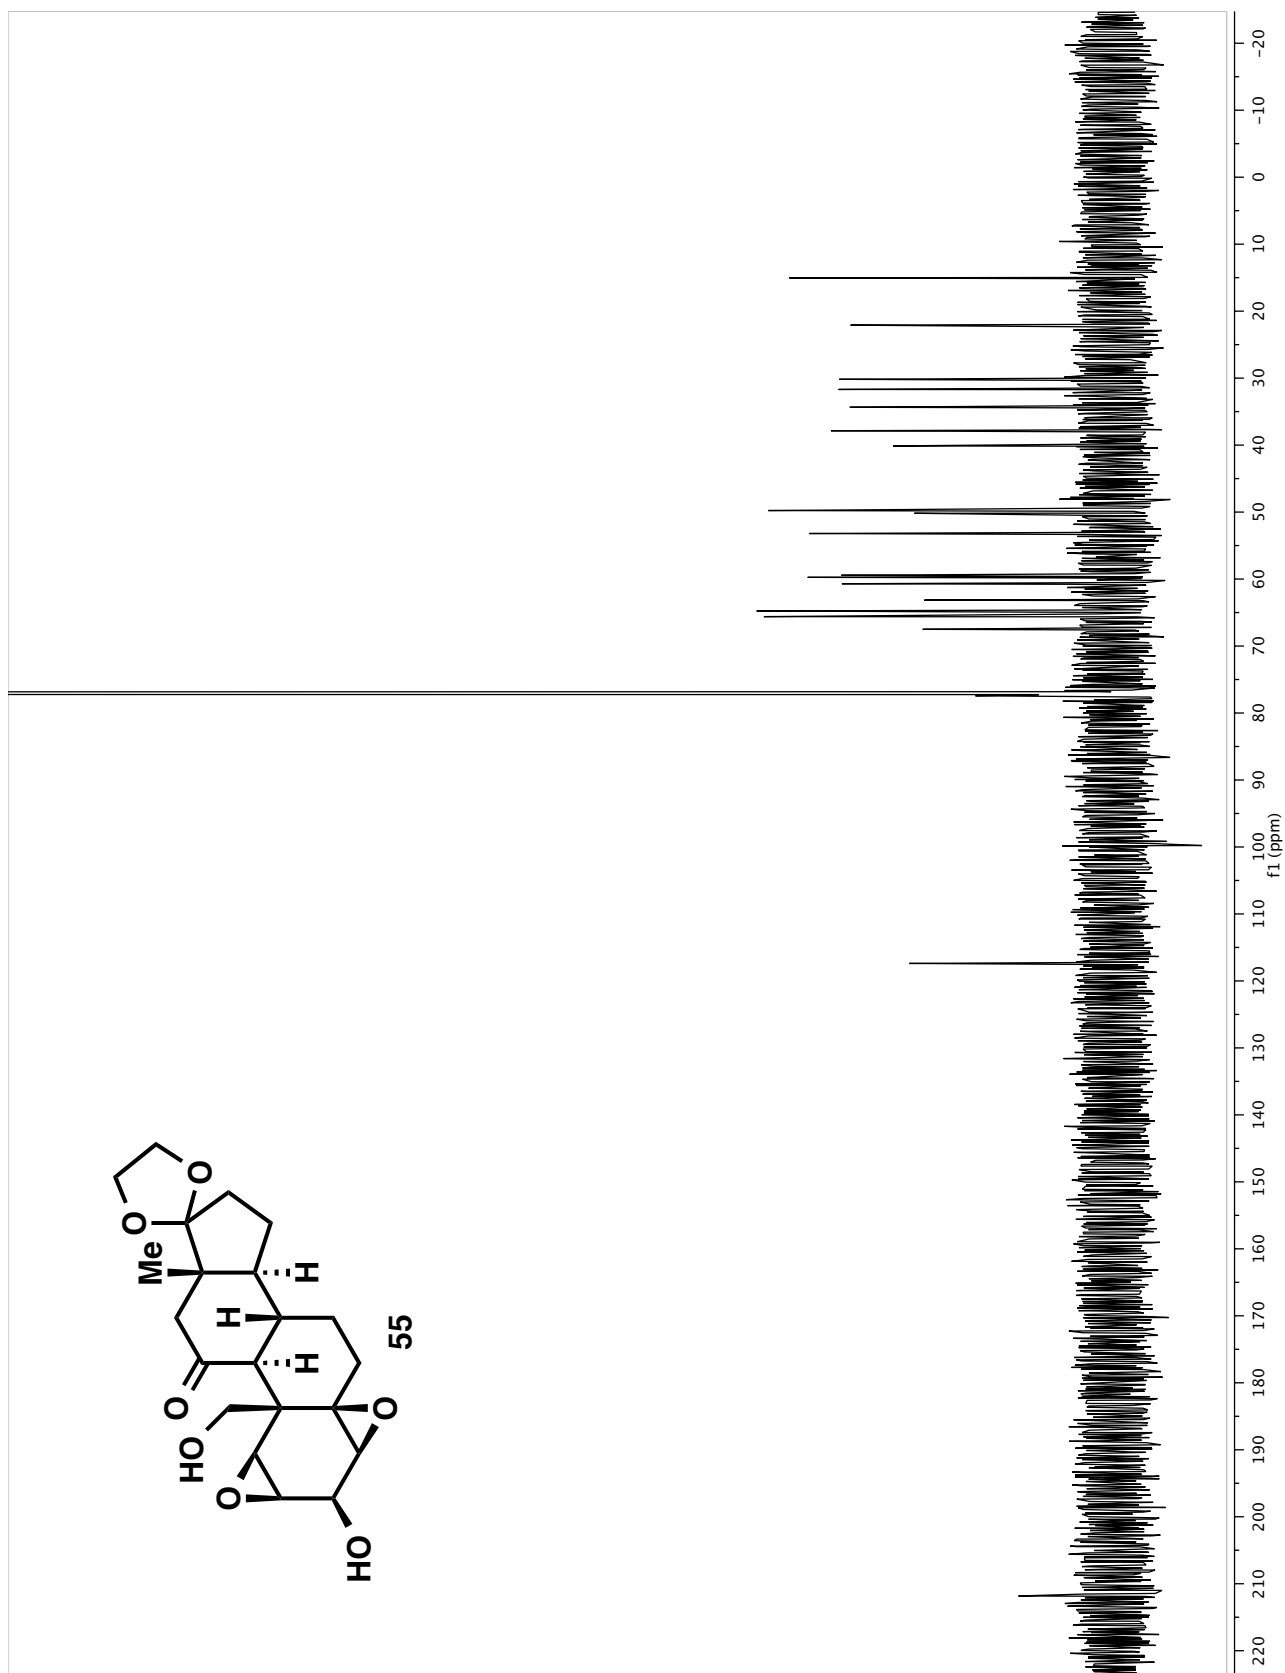

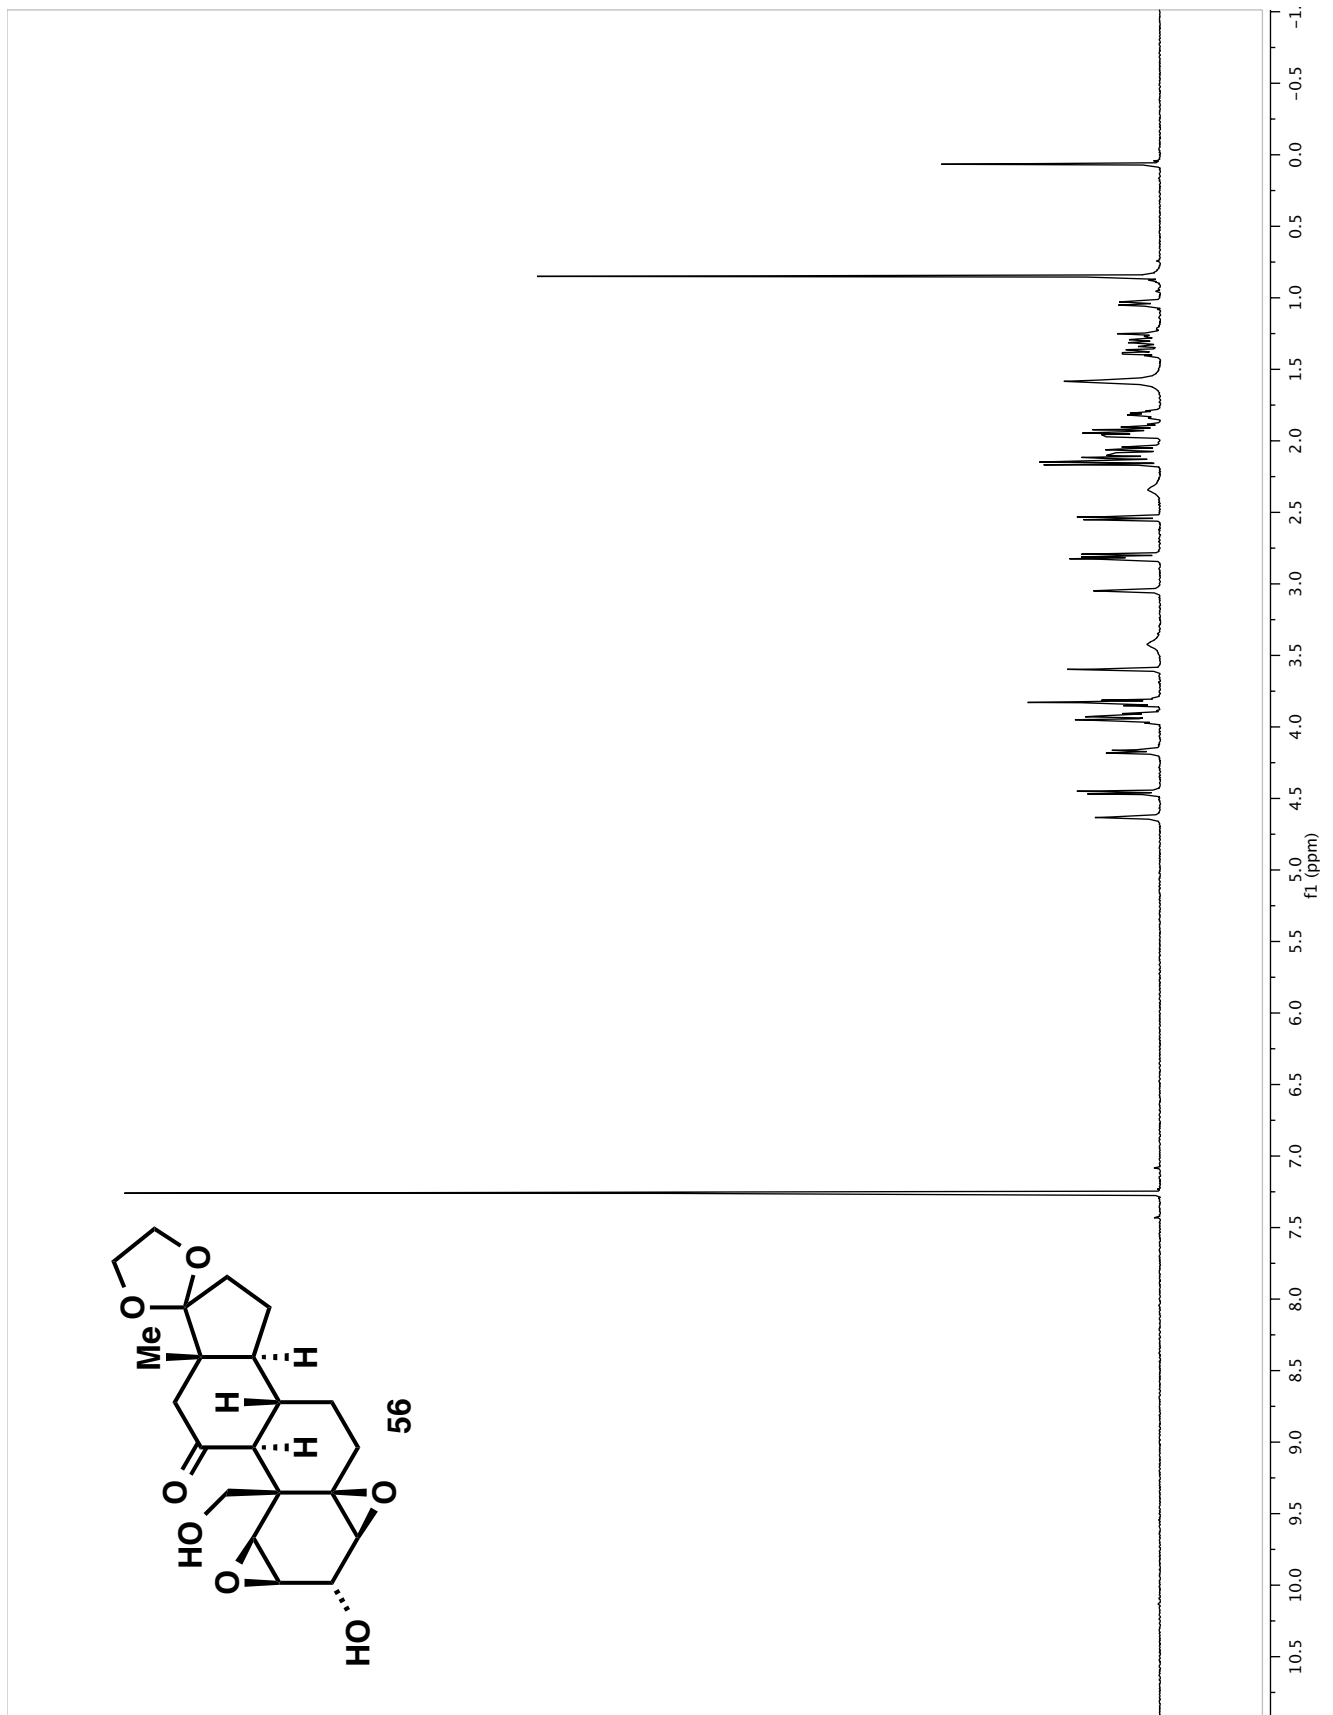

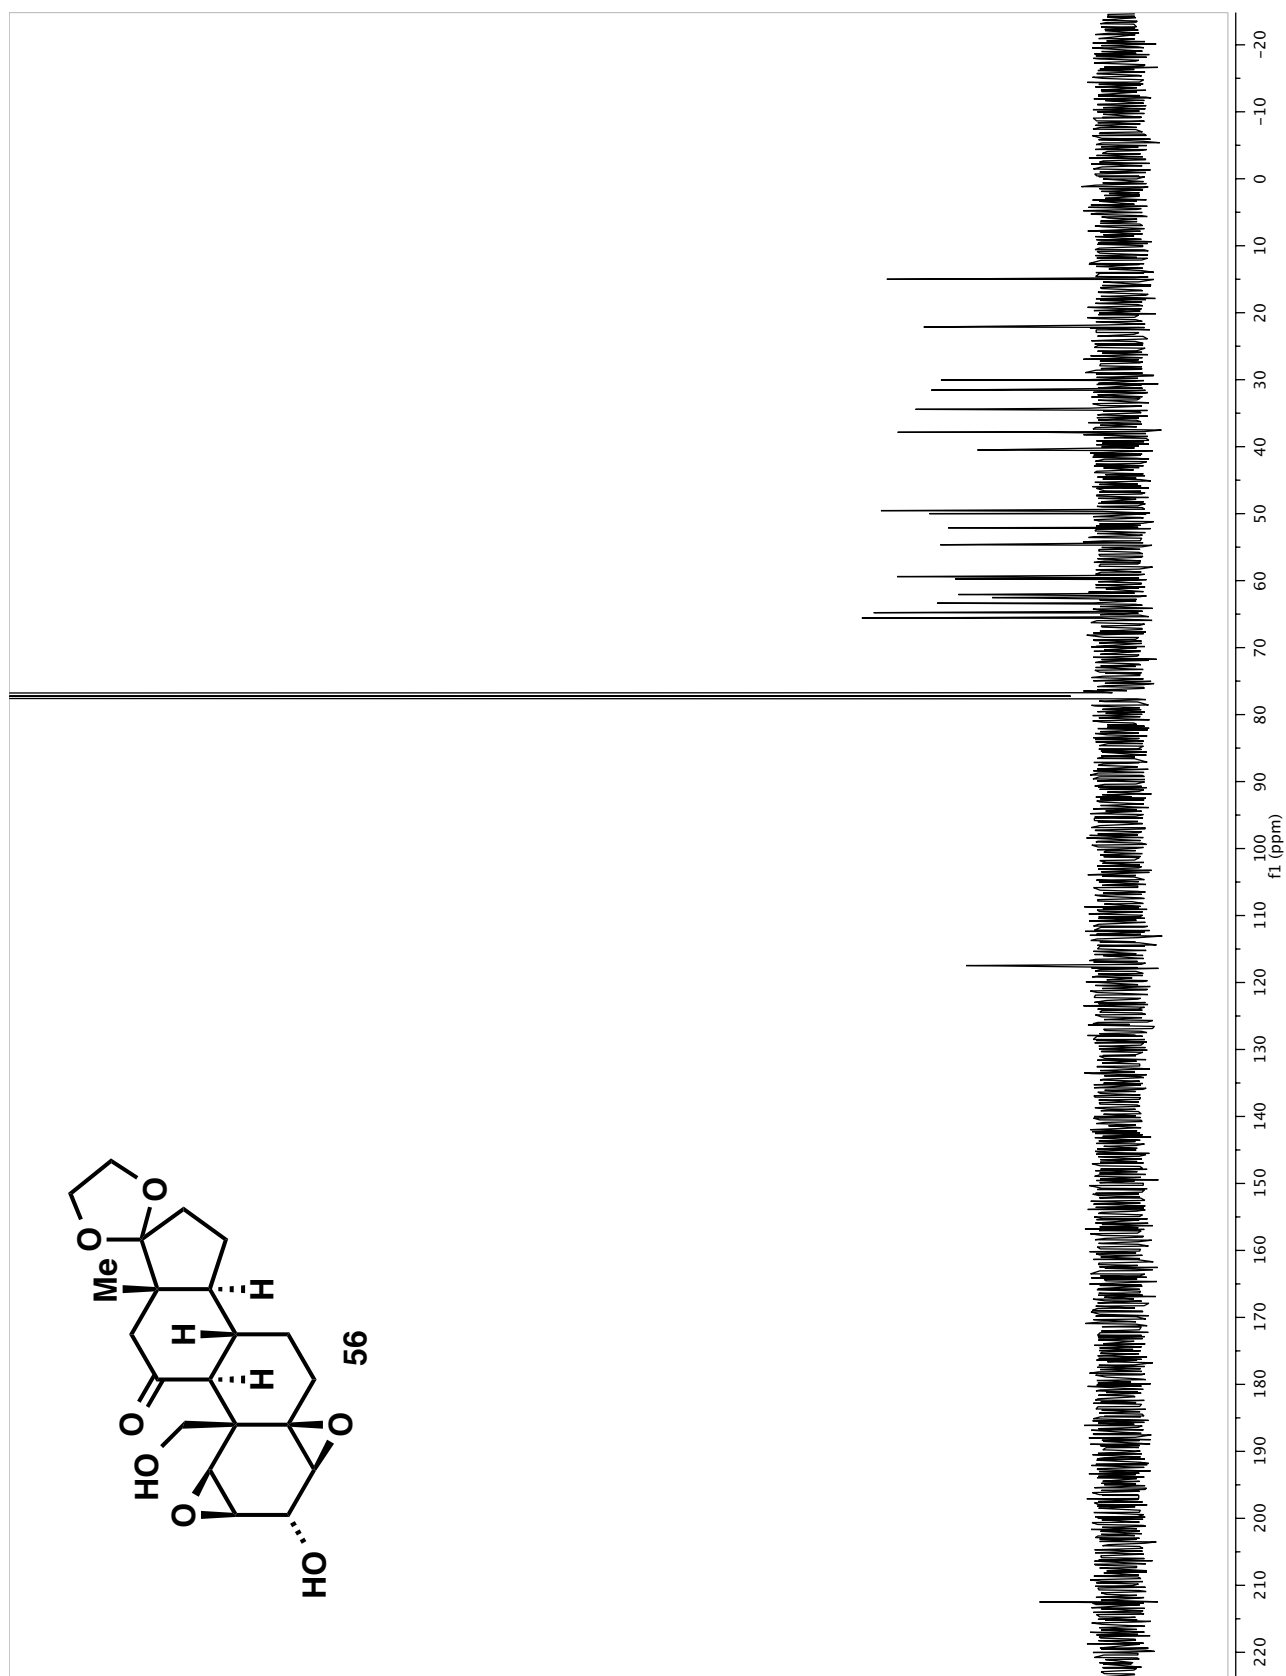

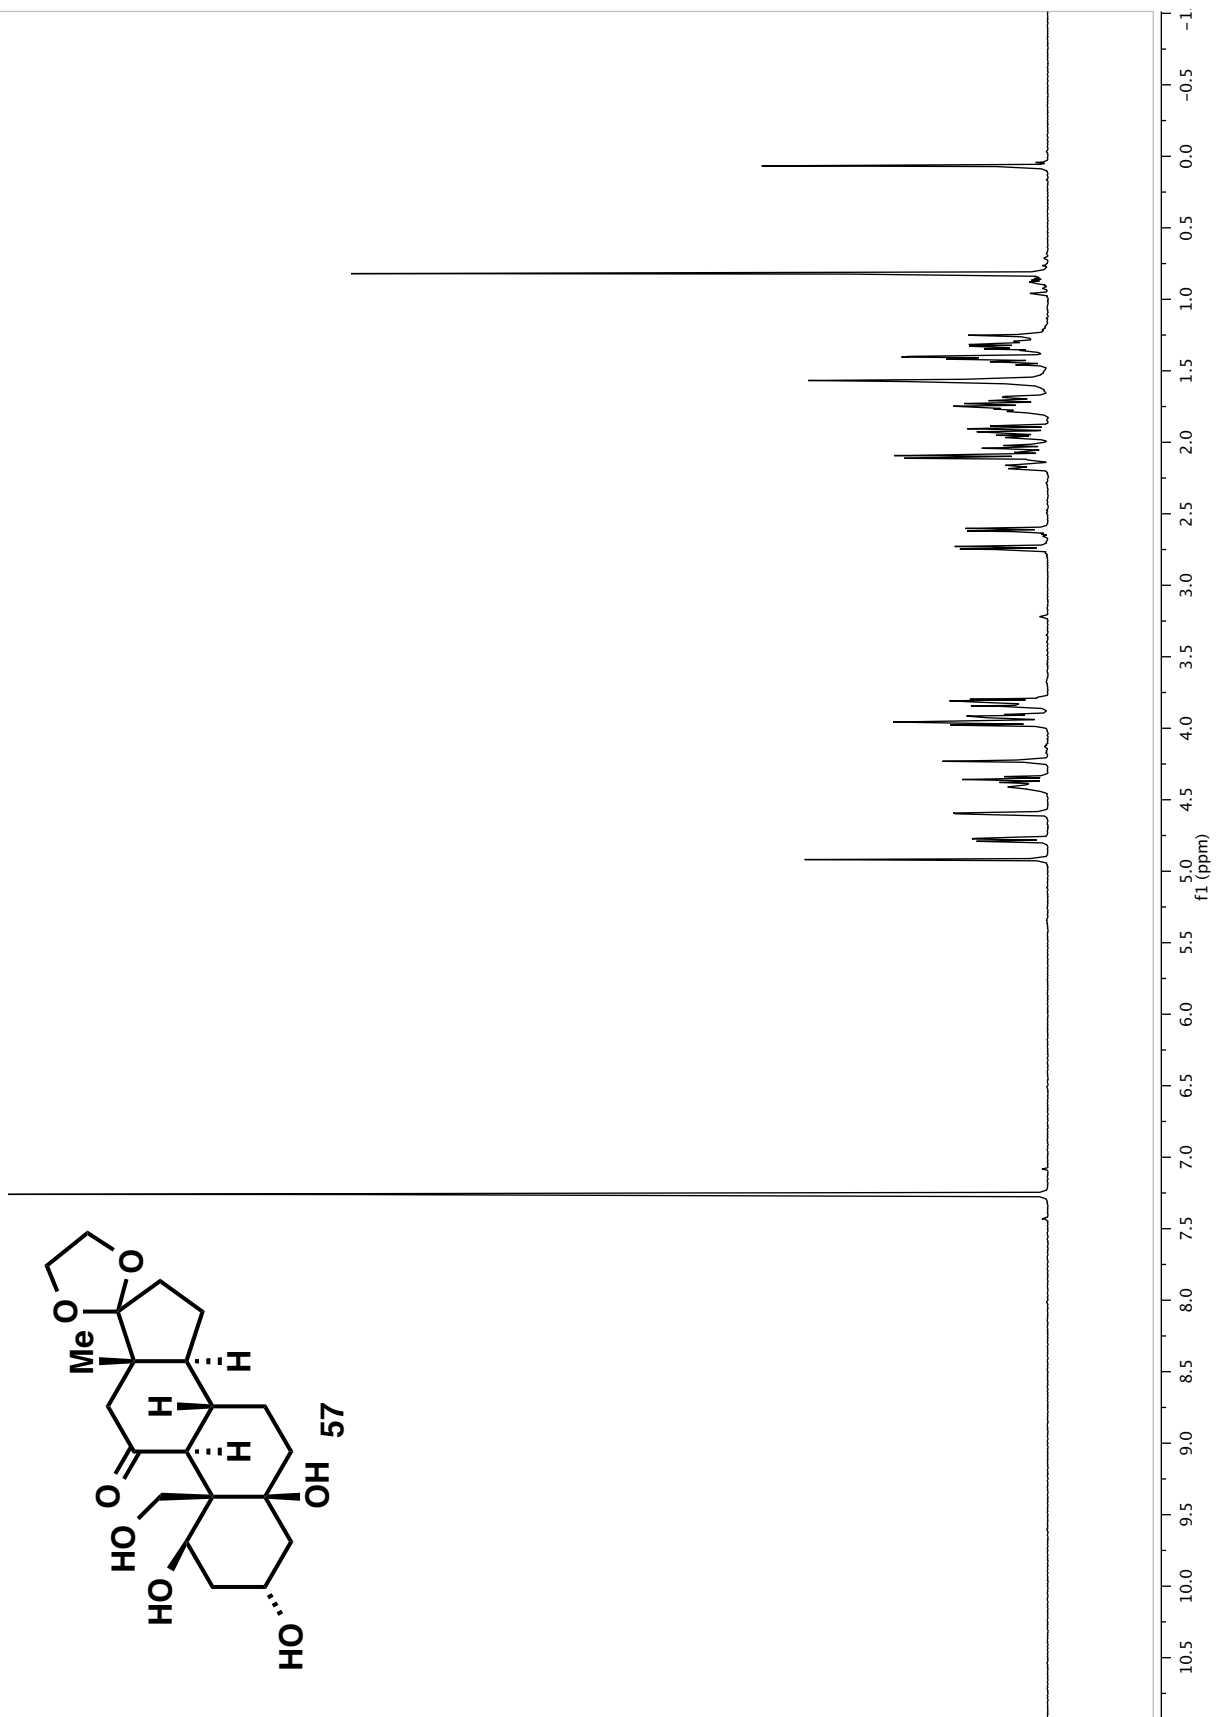

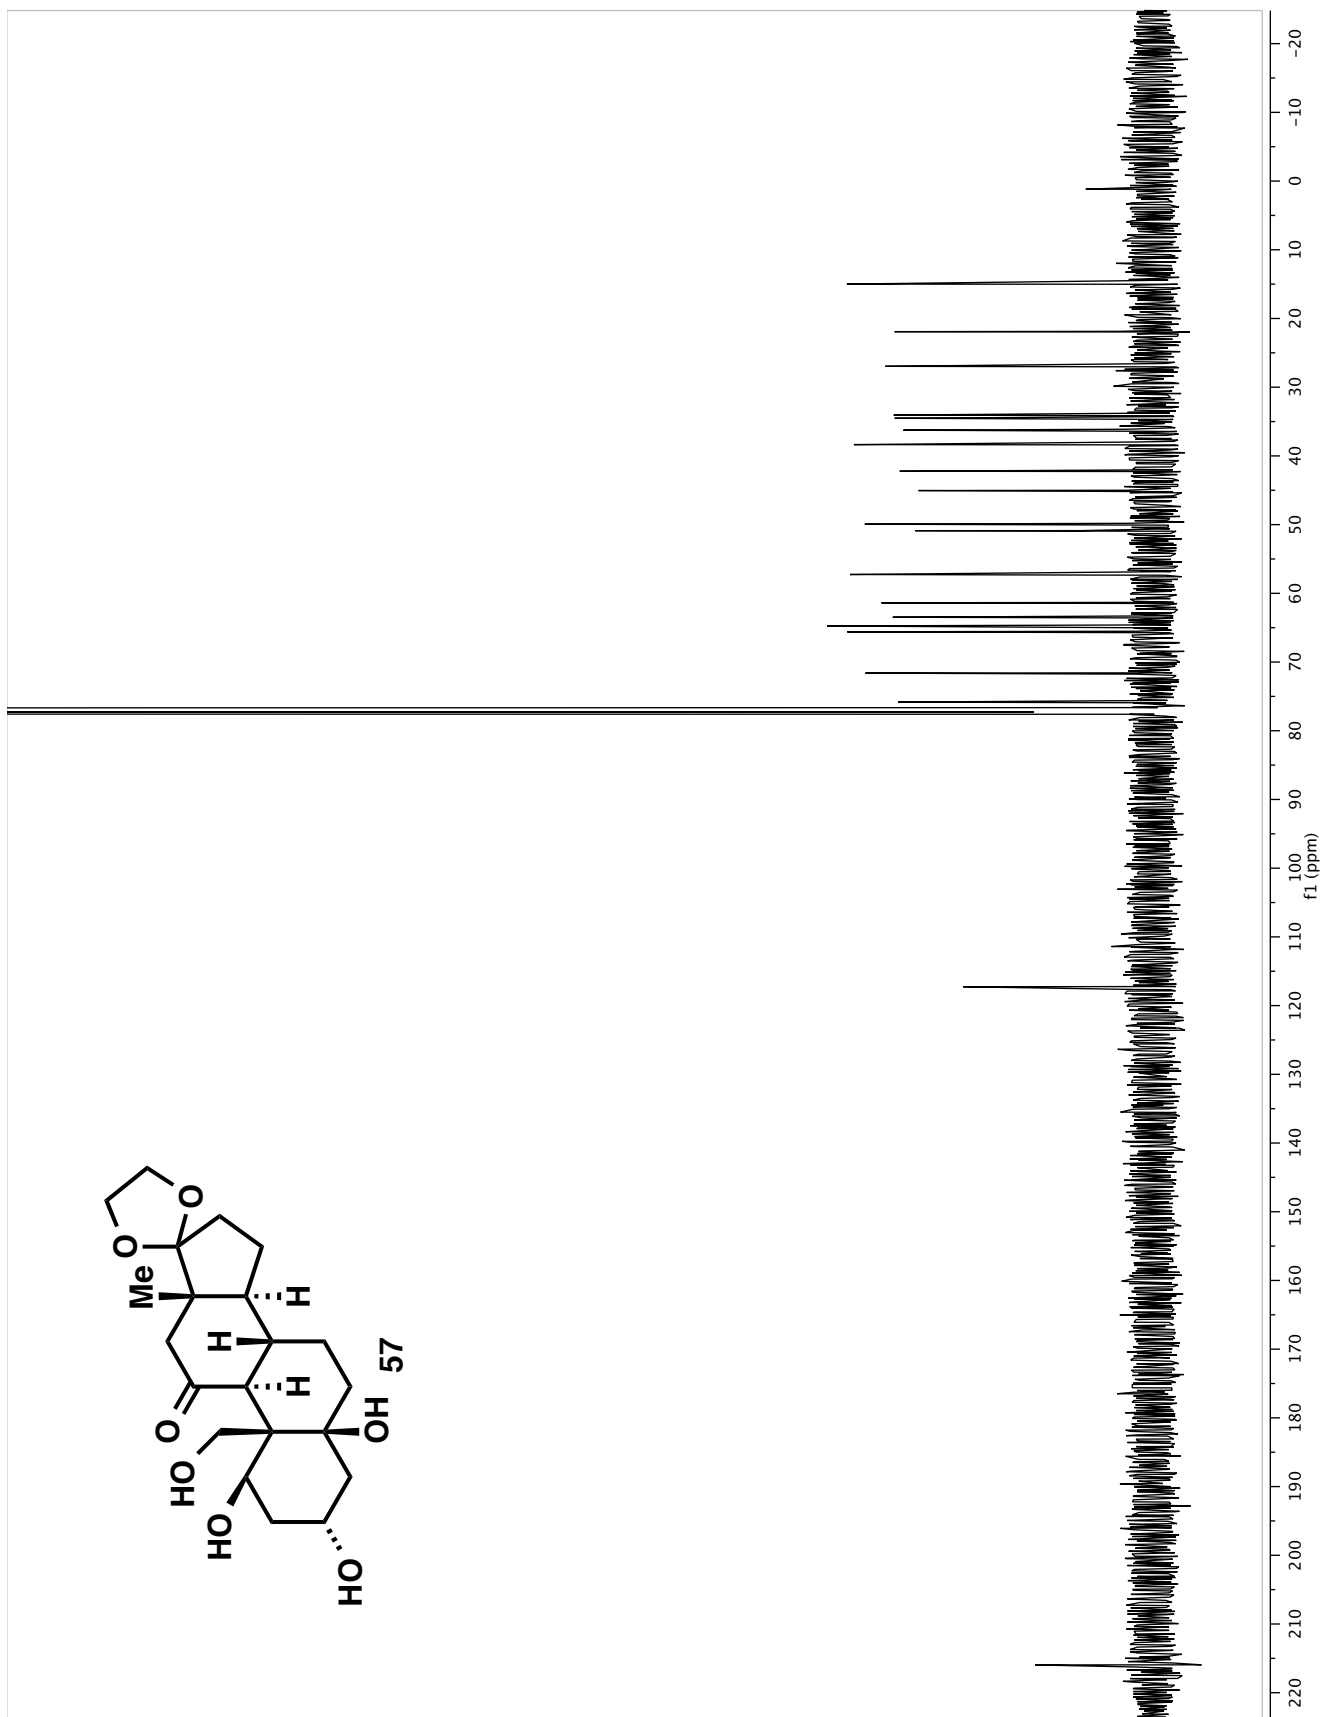

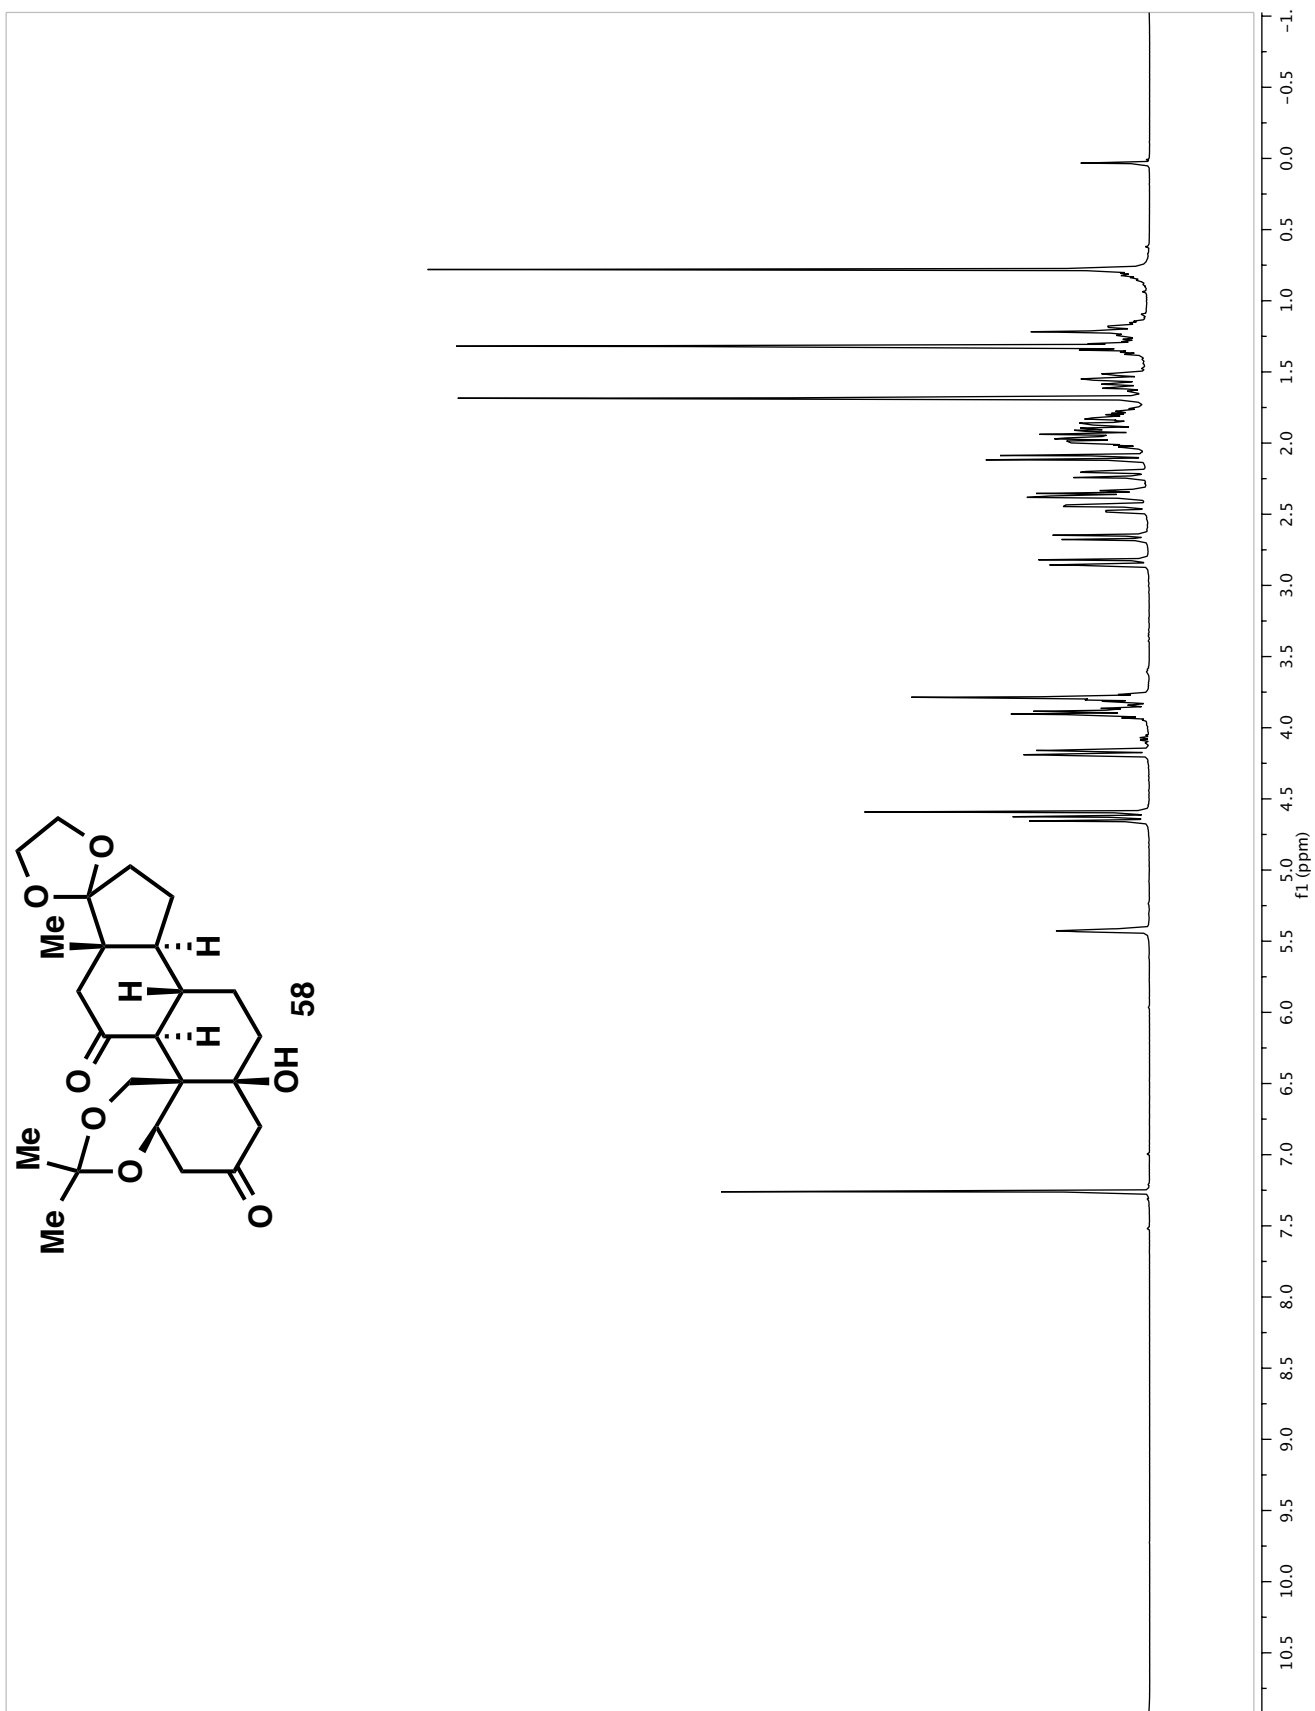

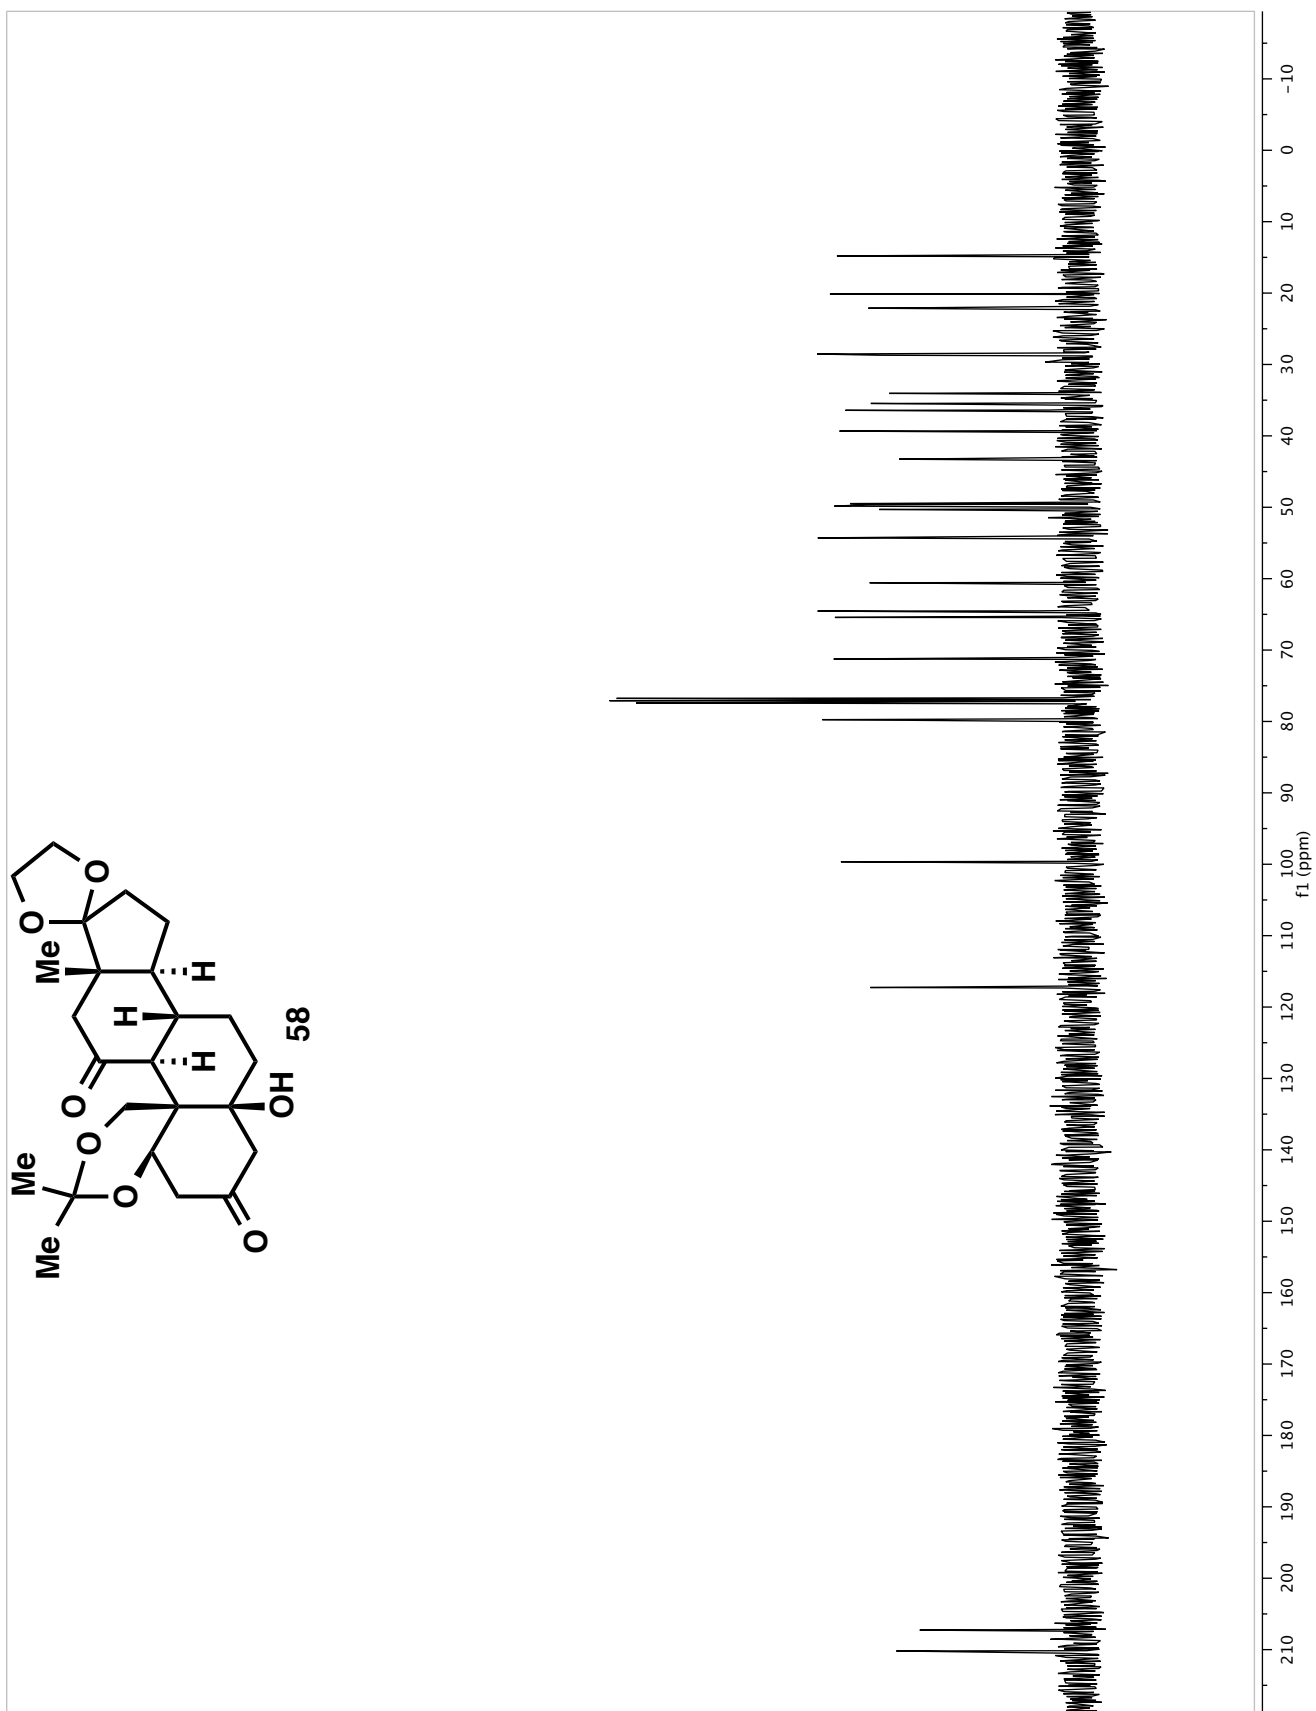

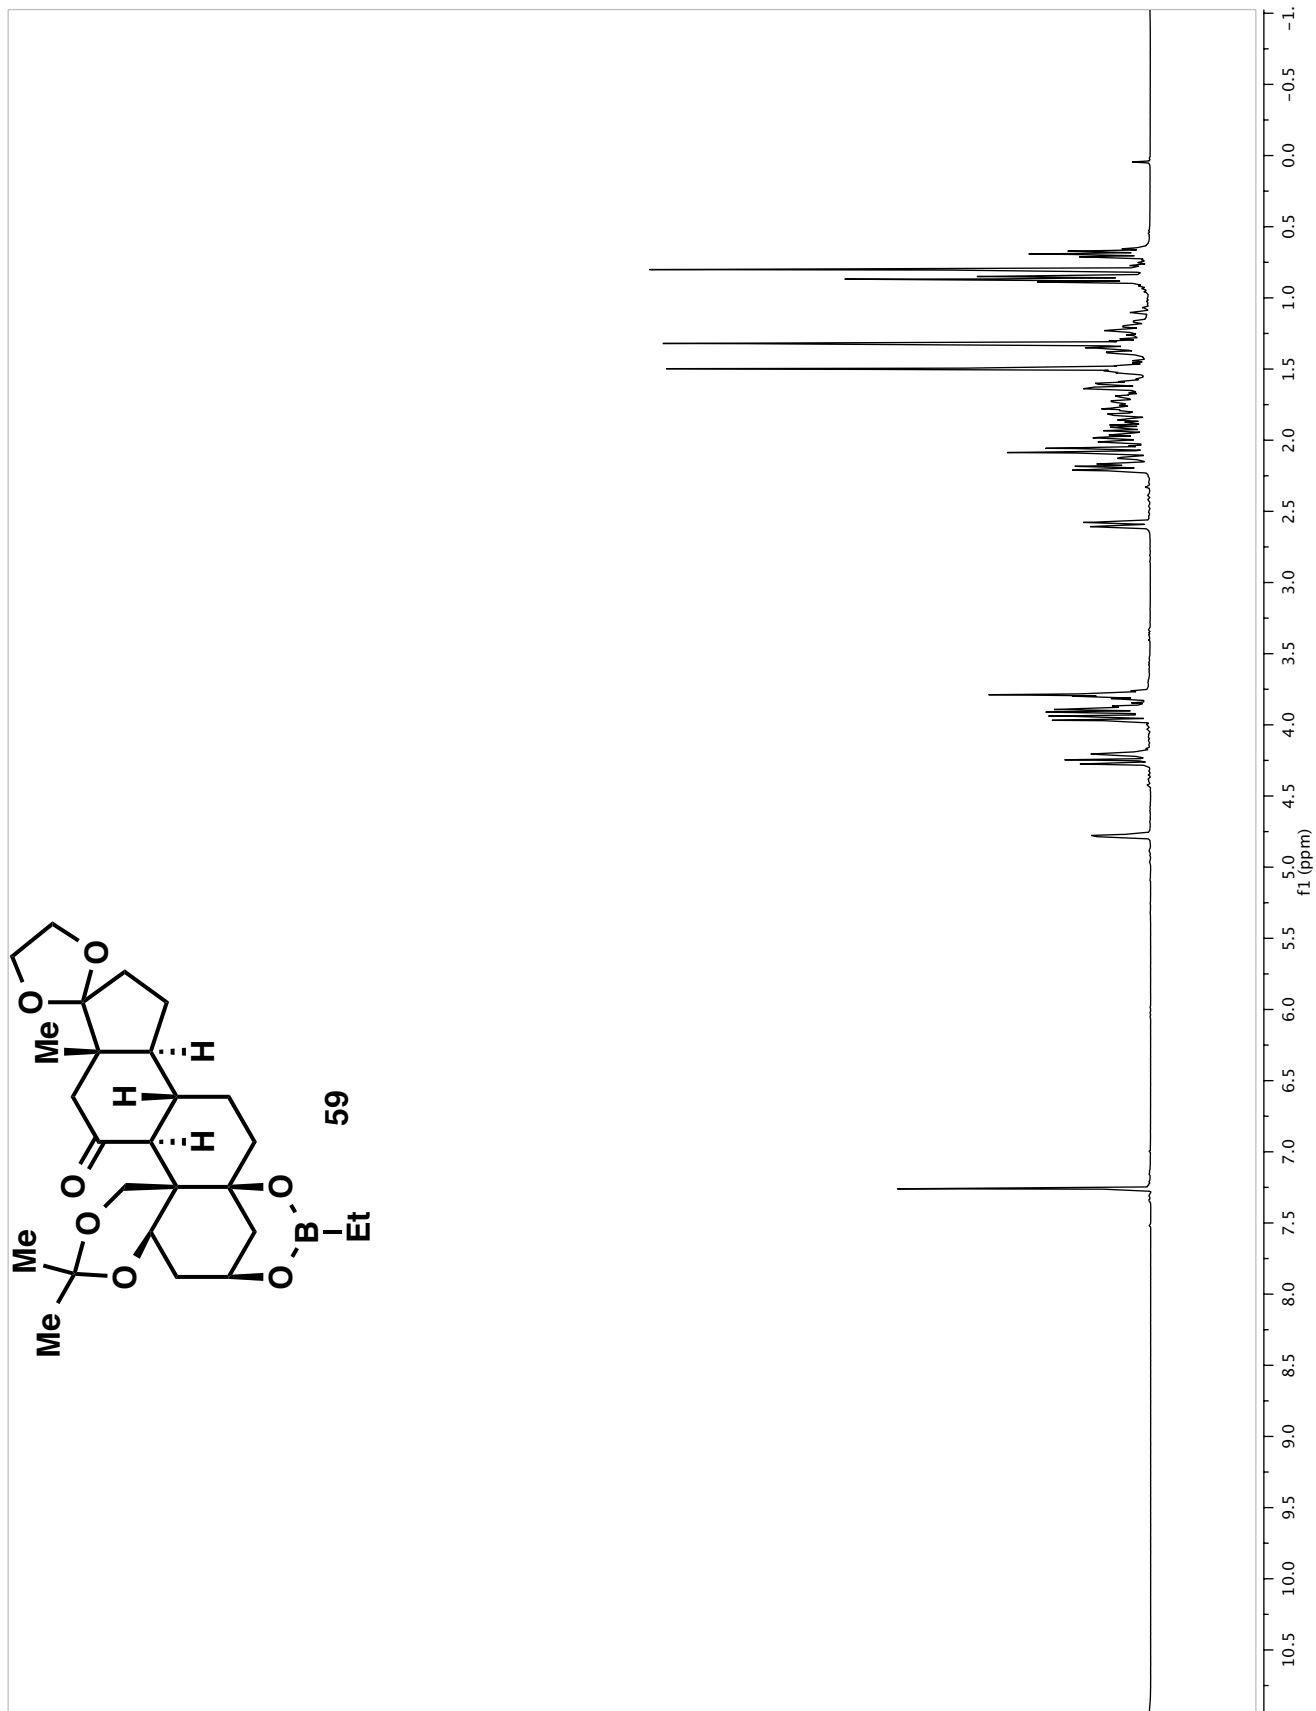



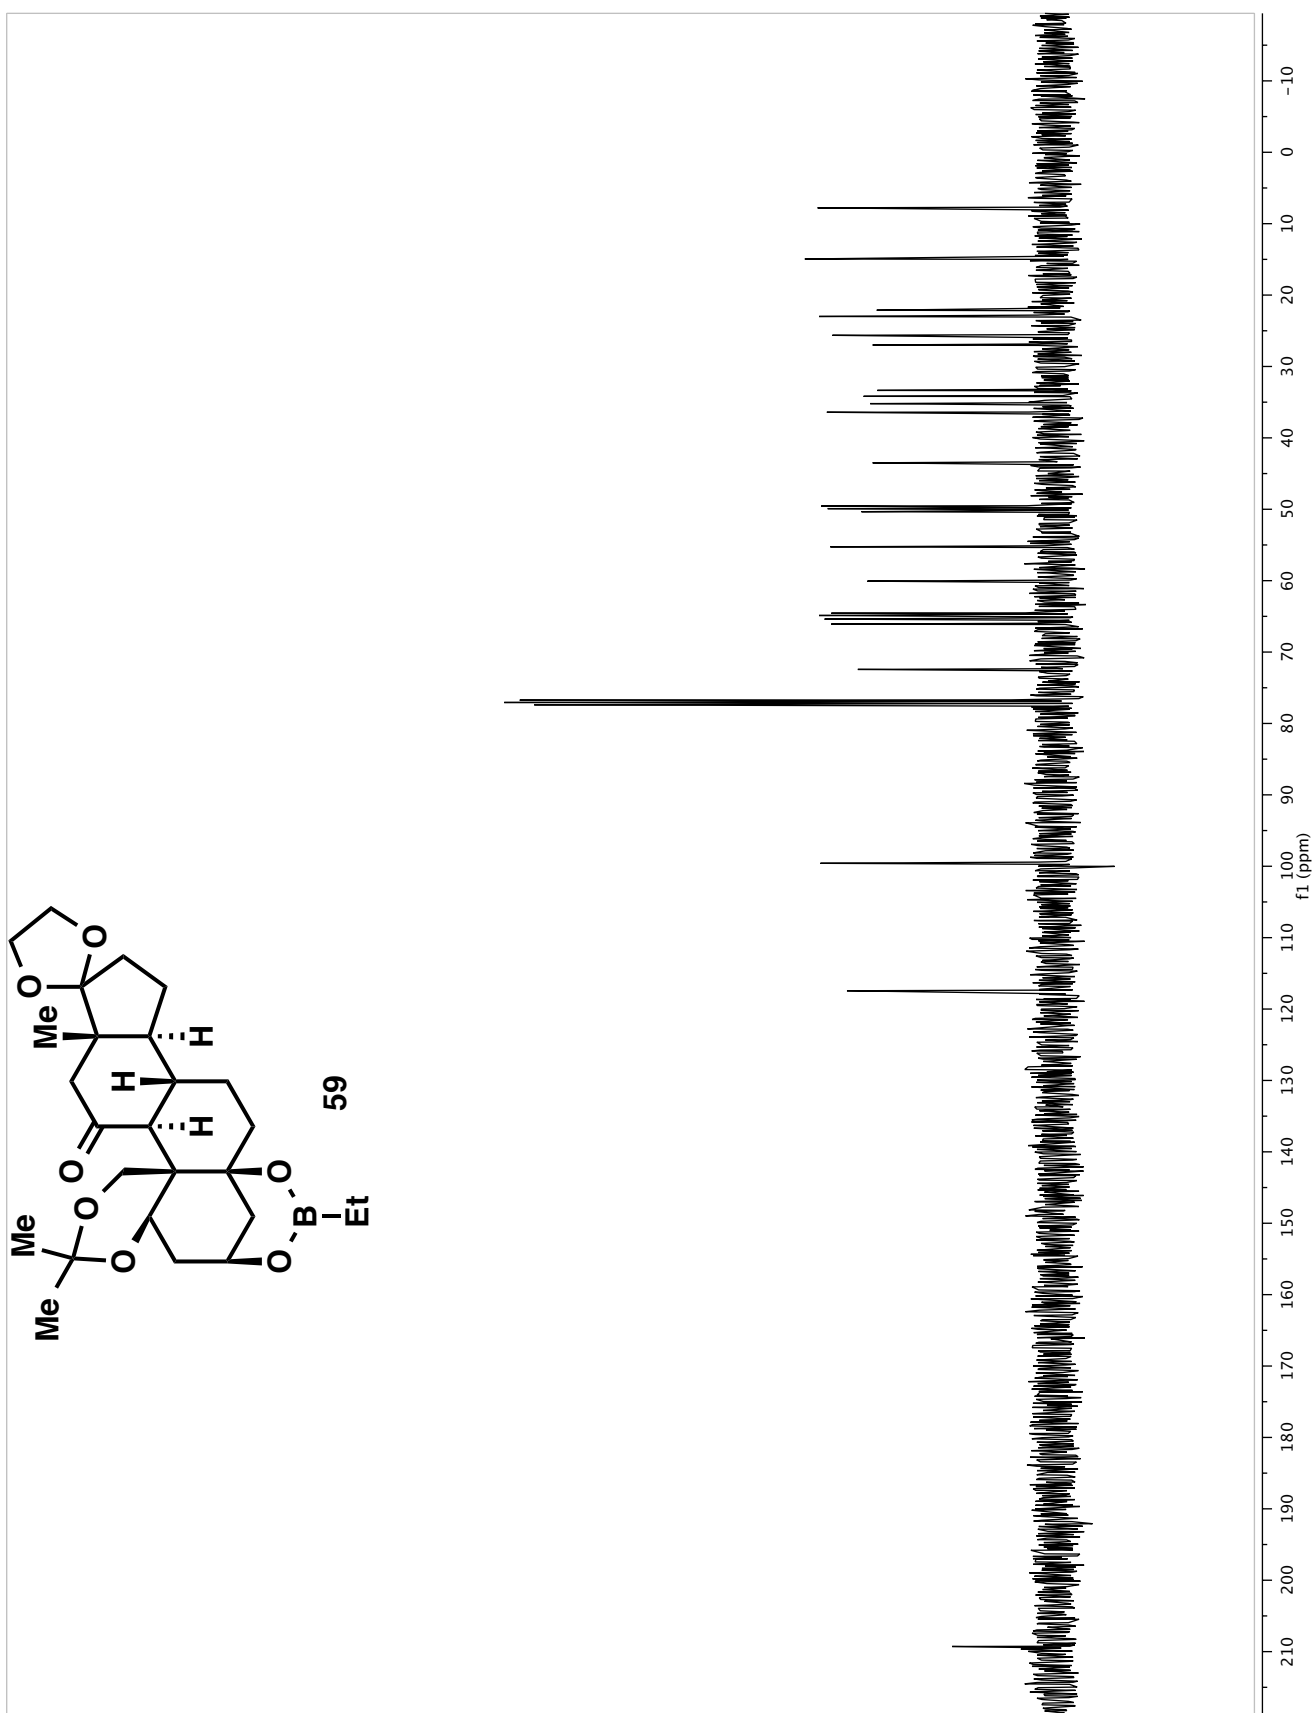

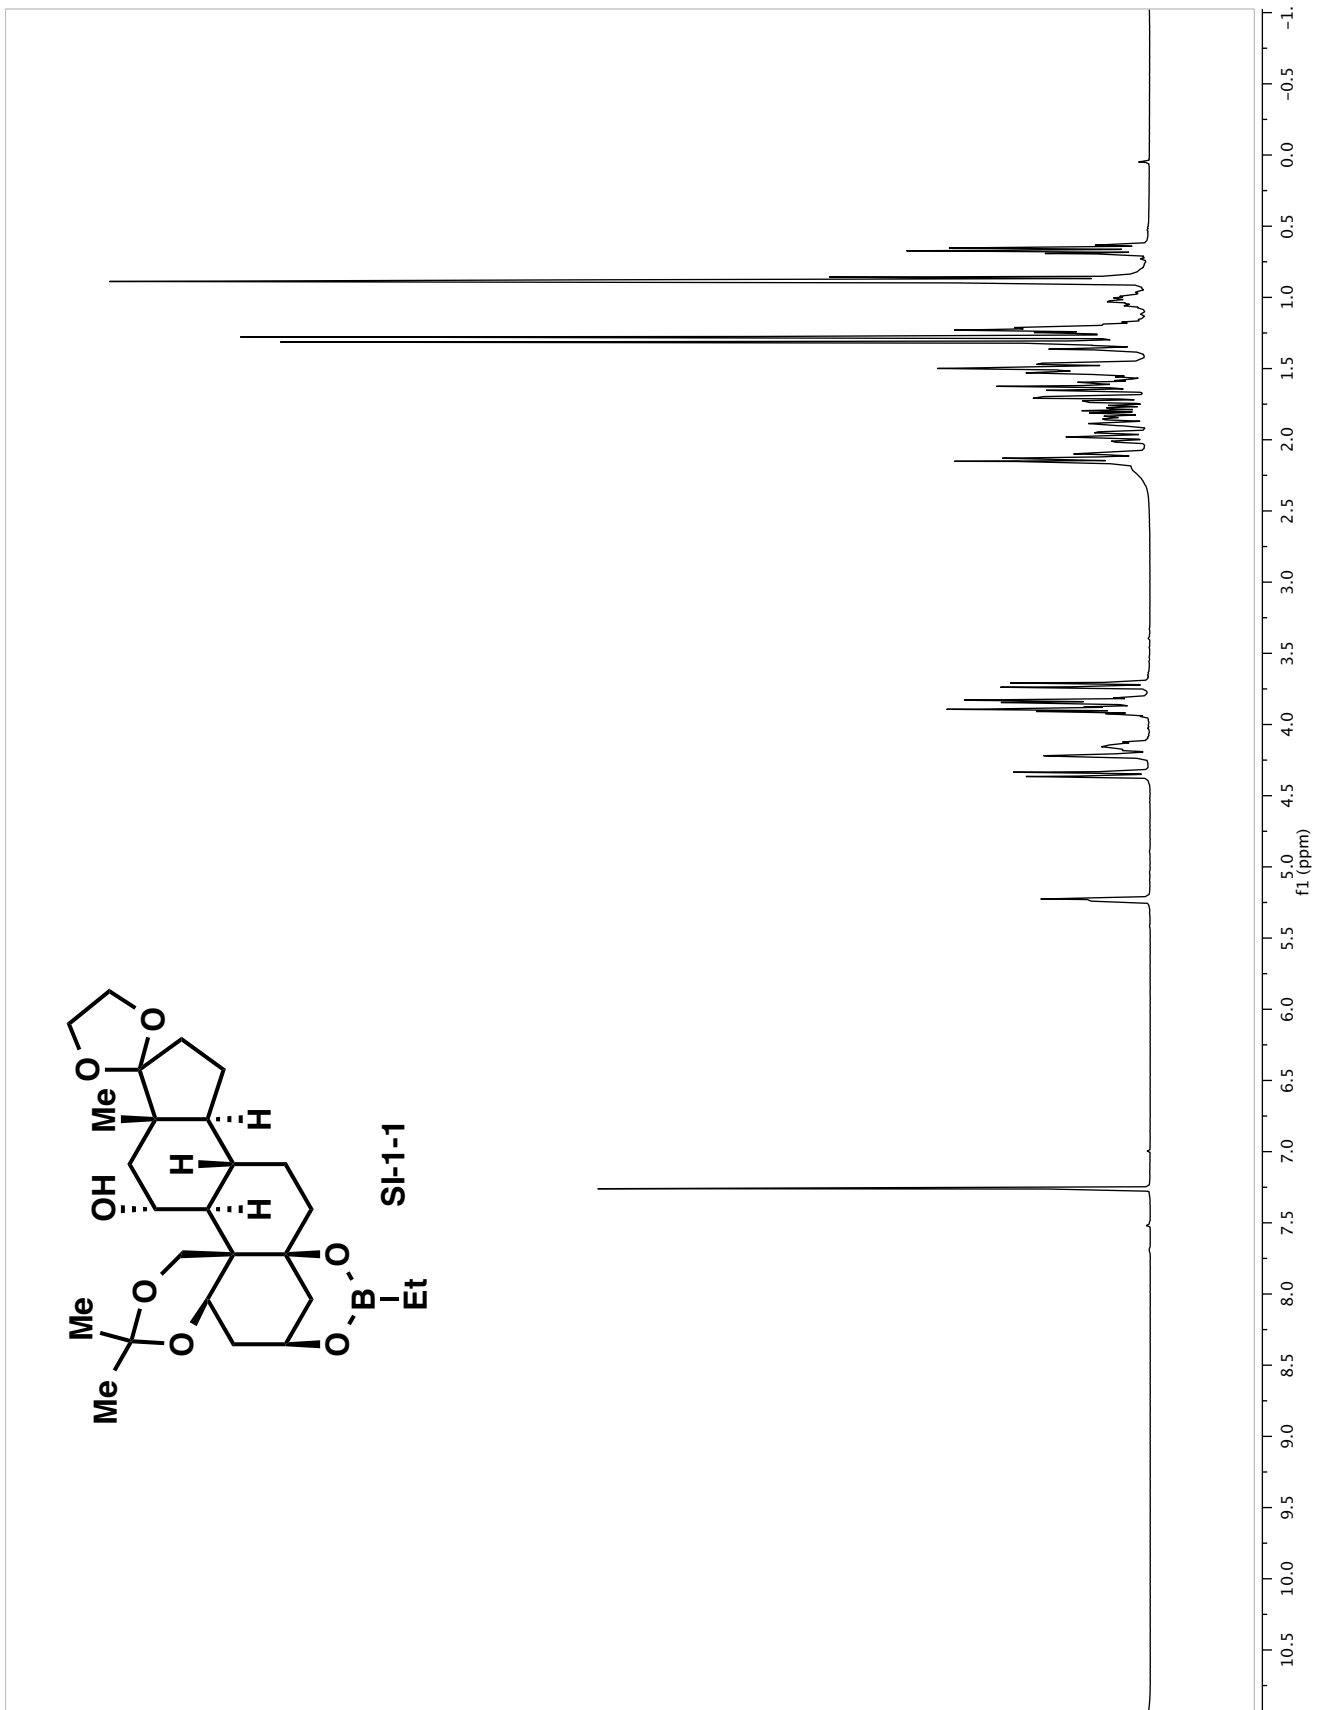

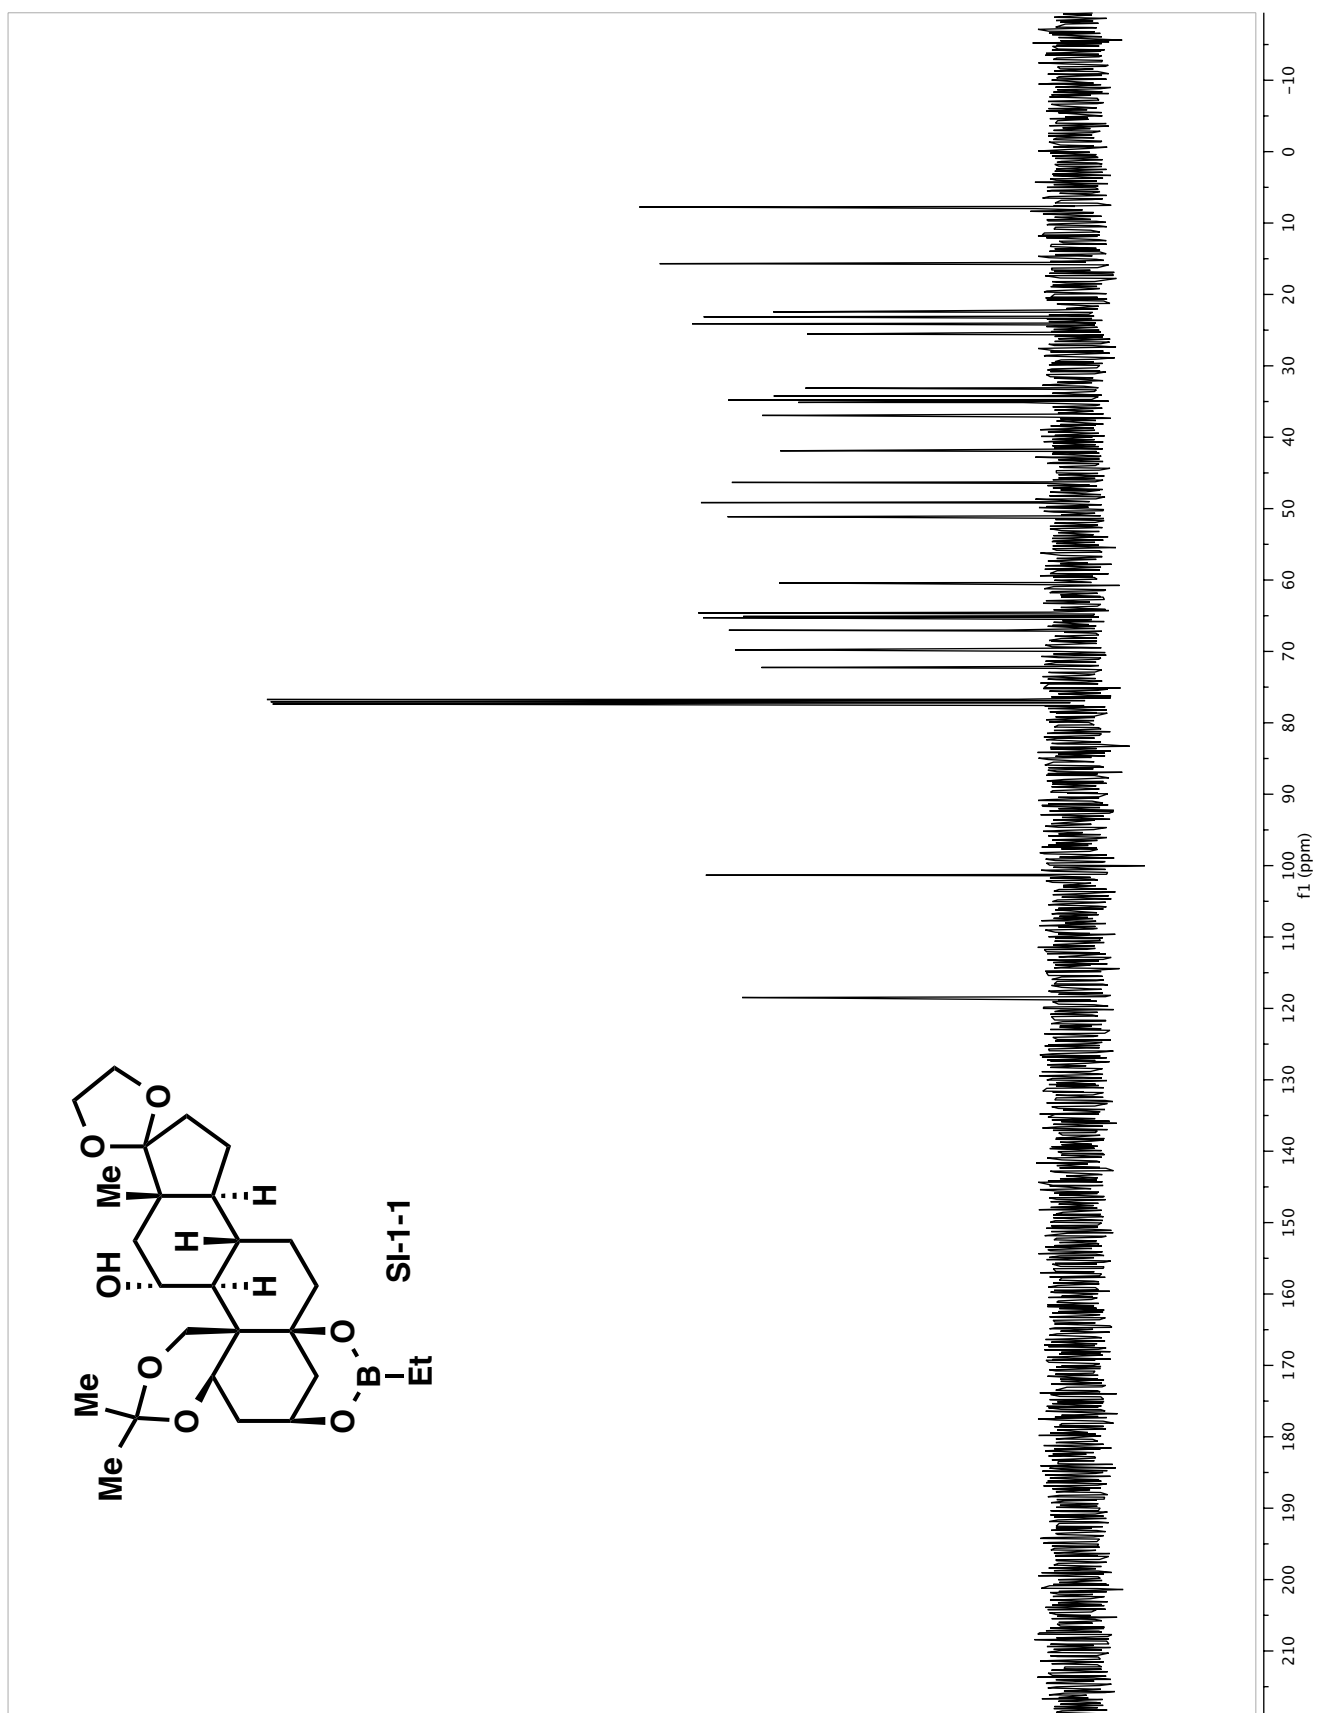

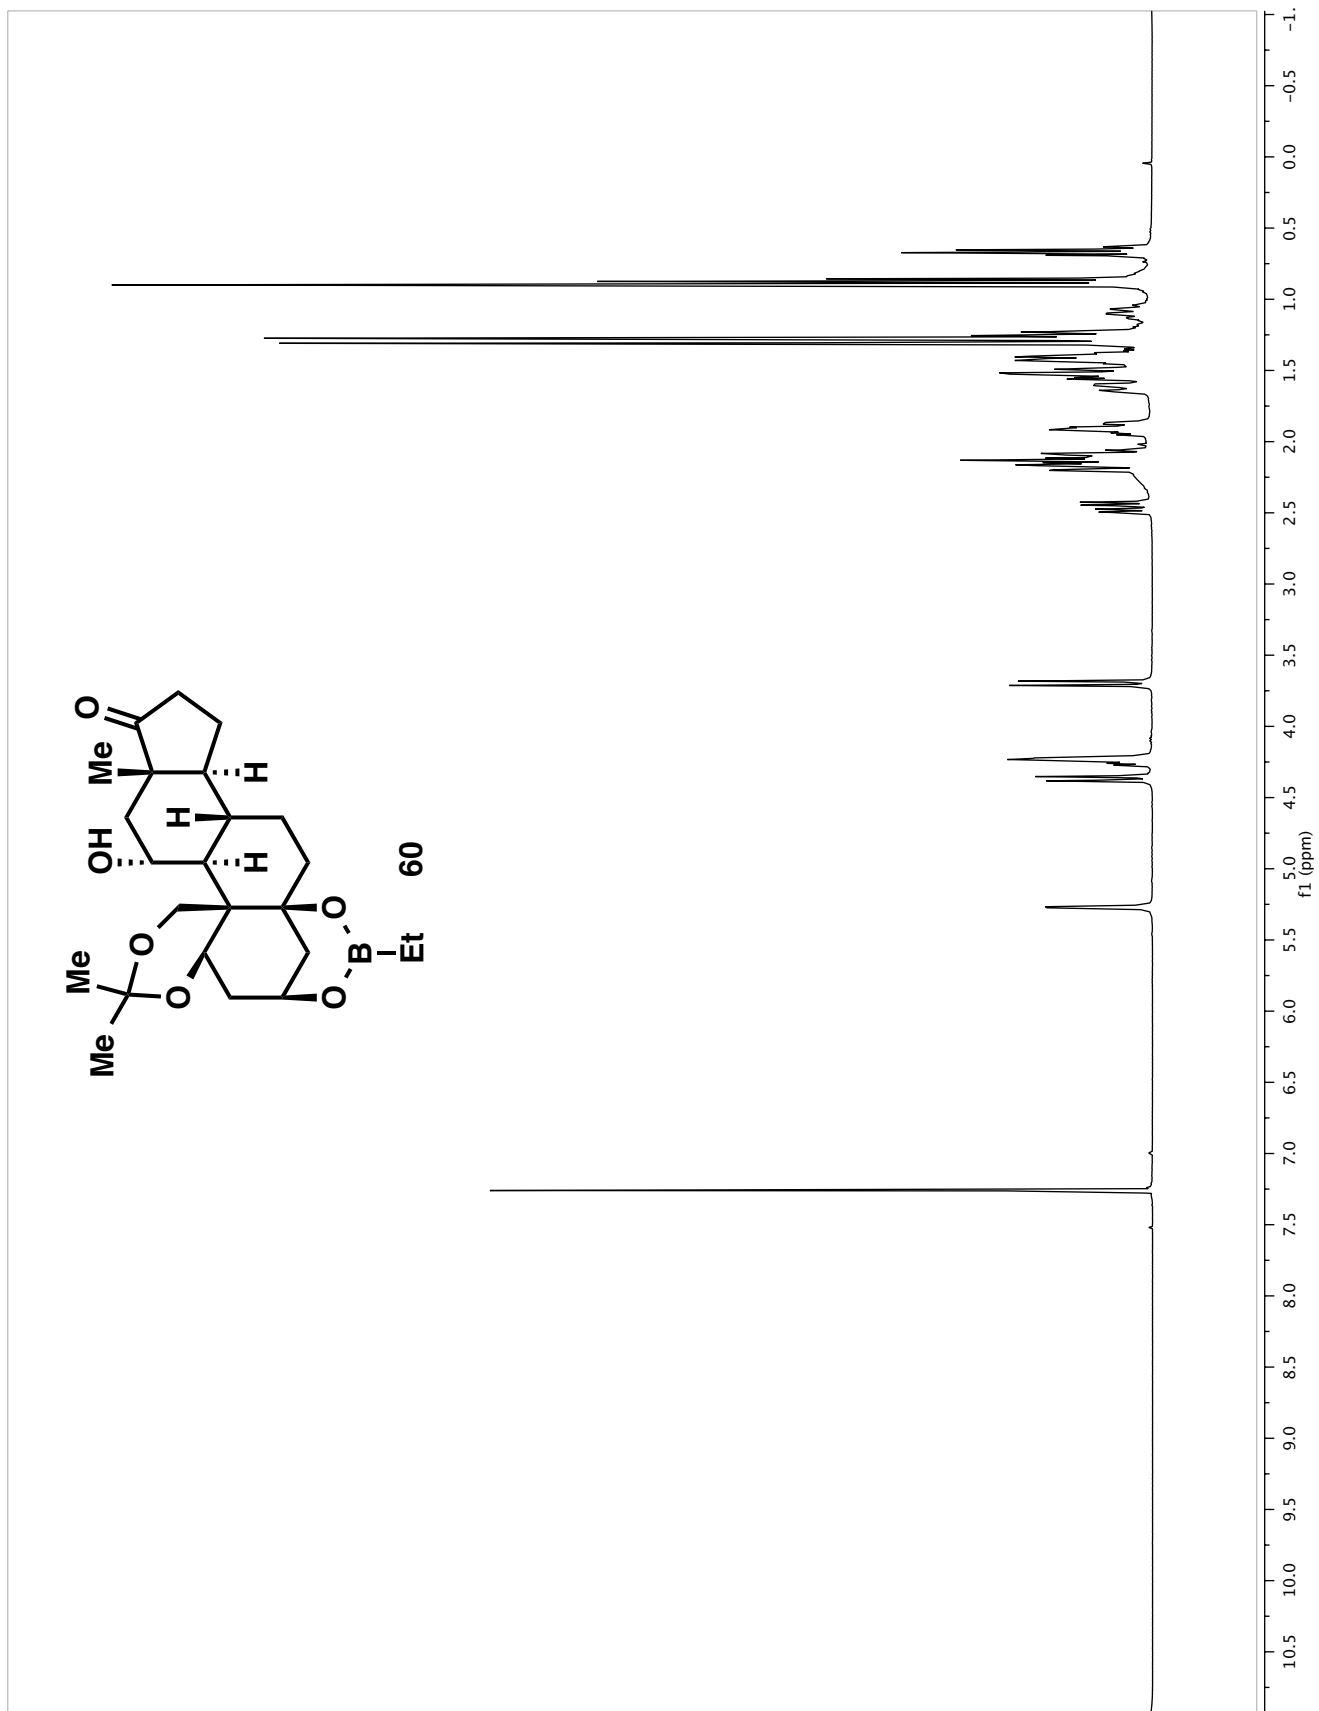

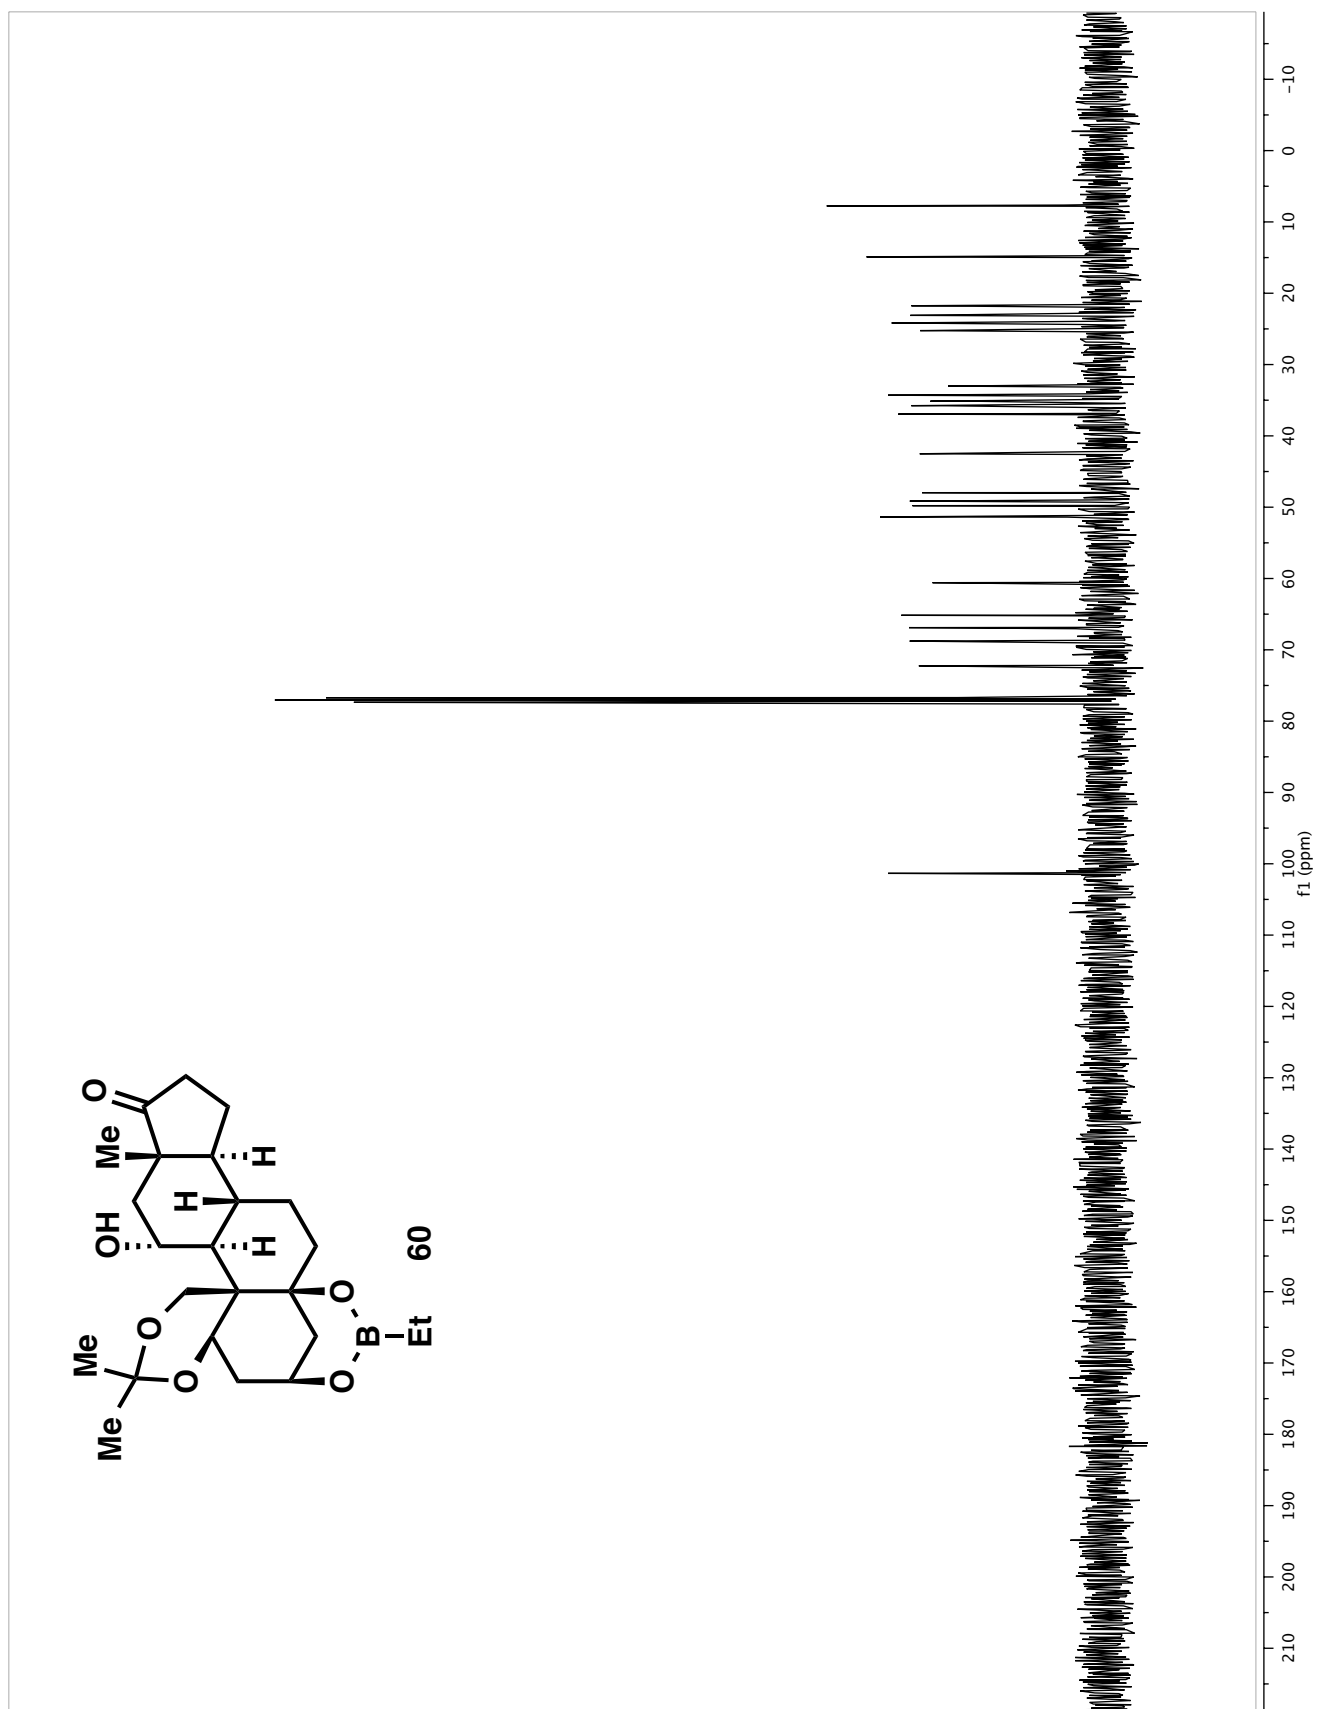

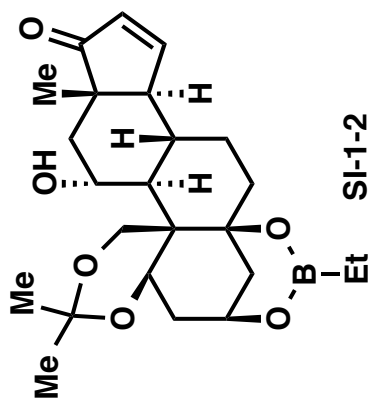

SI-1-2

Et

B

O

O

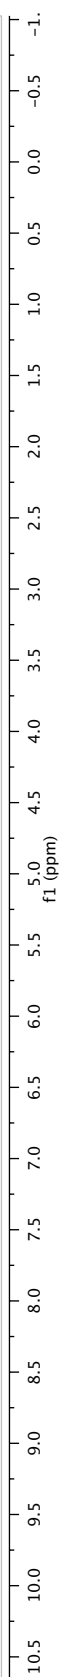

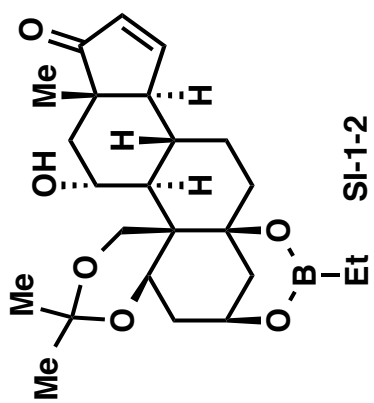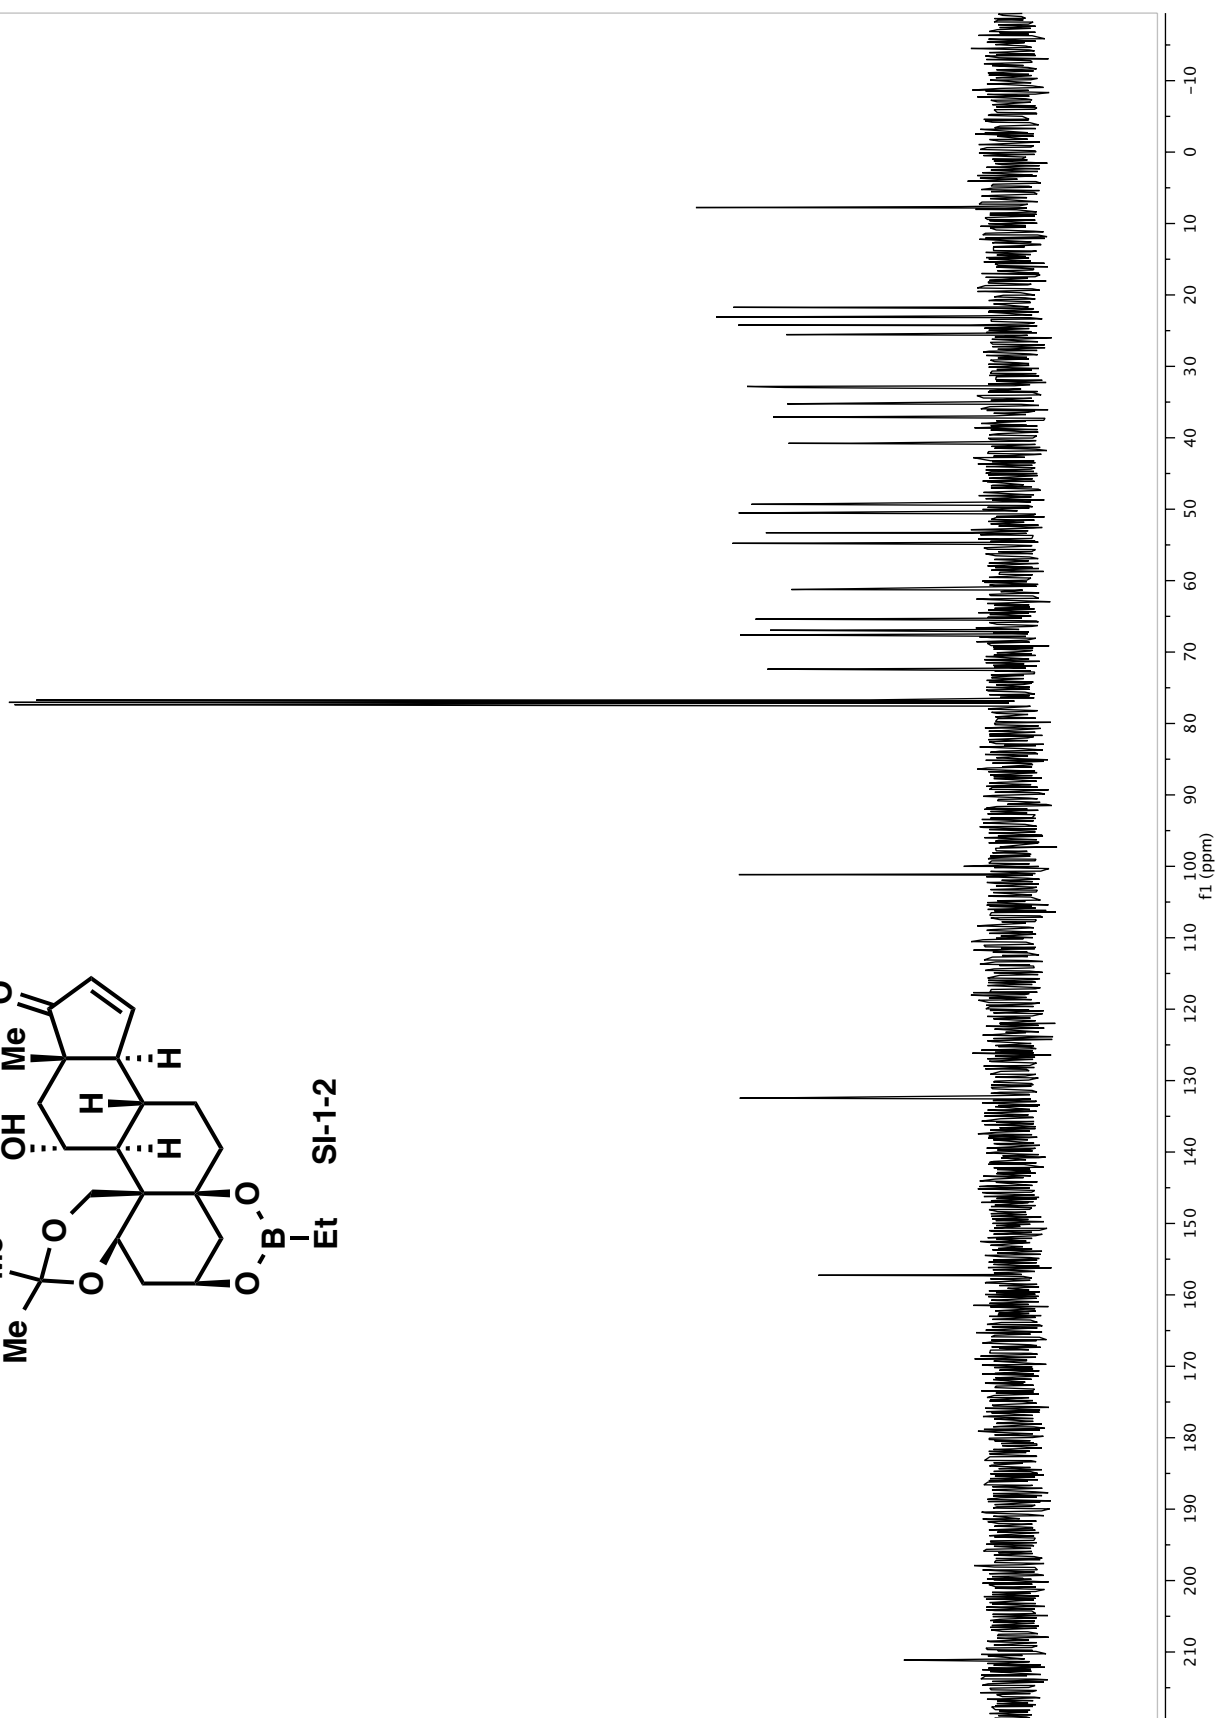

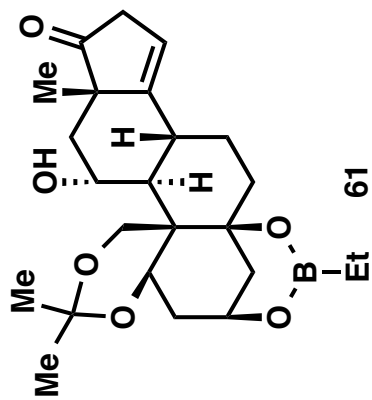

61

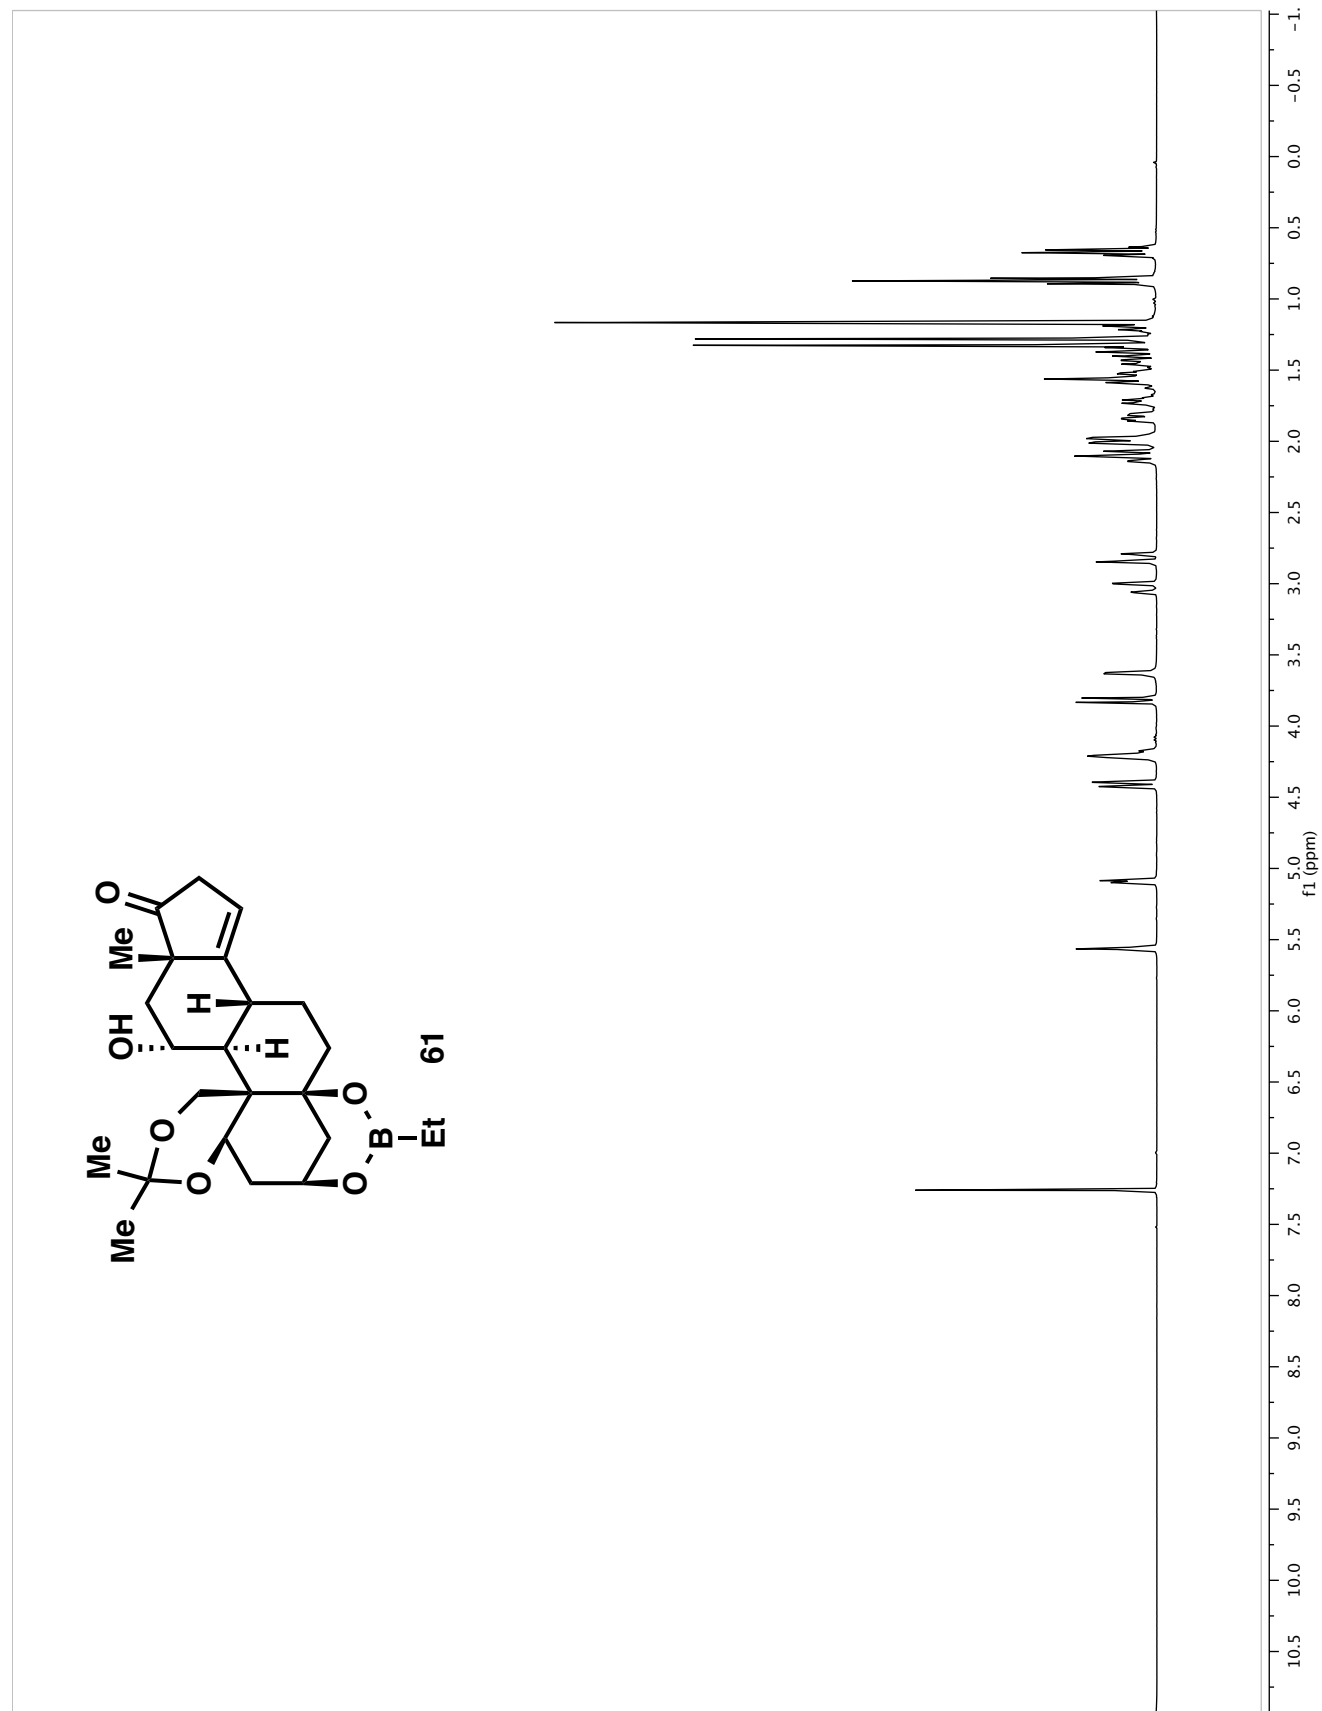



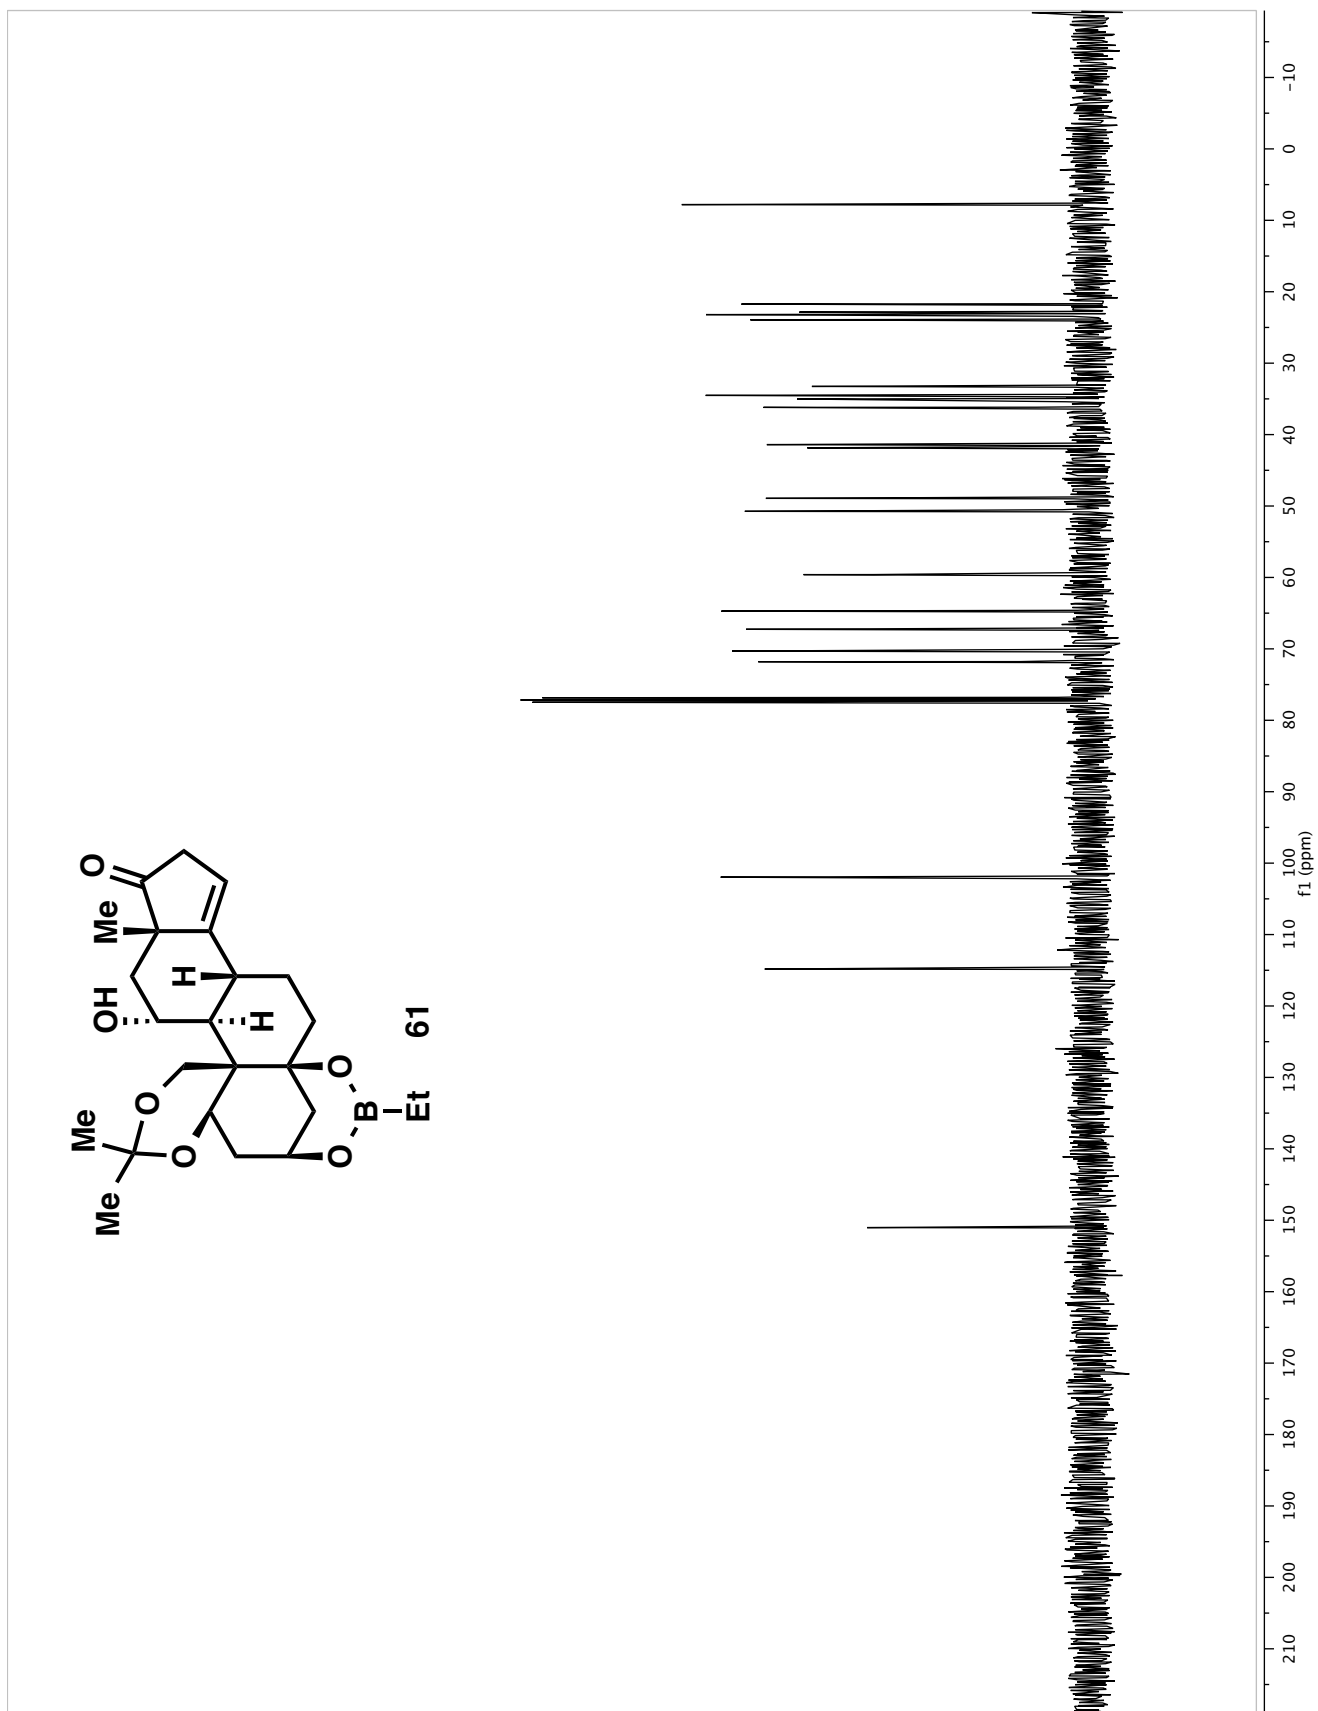

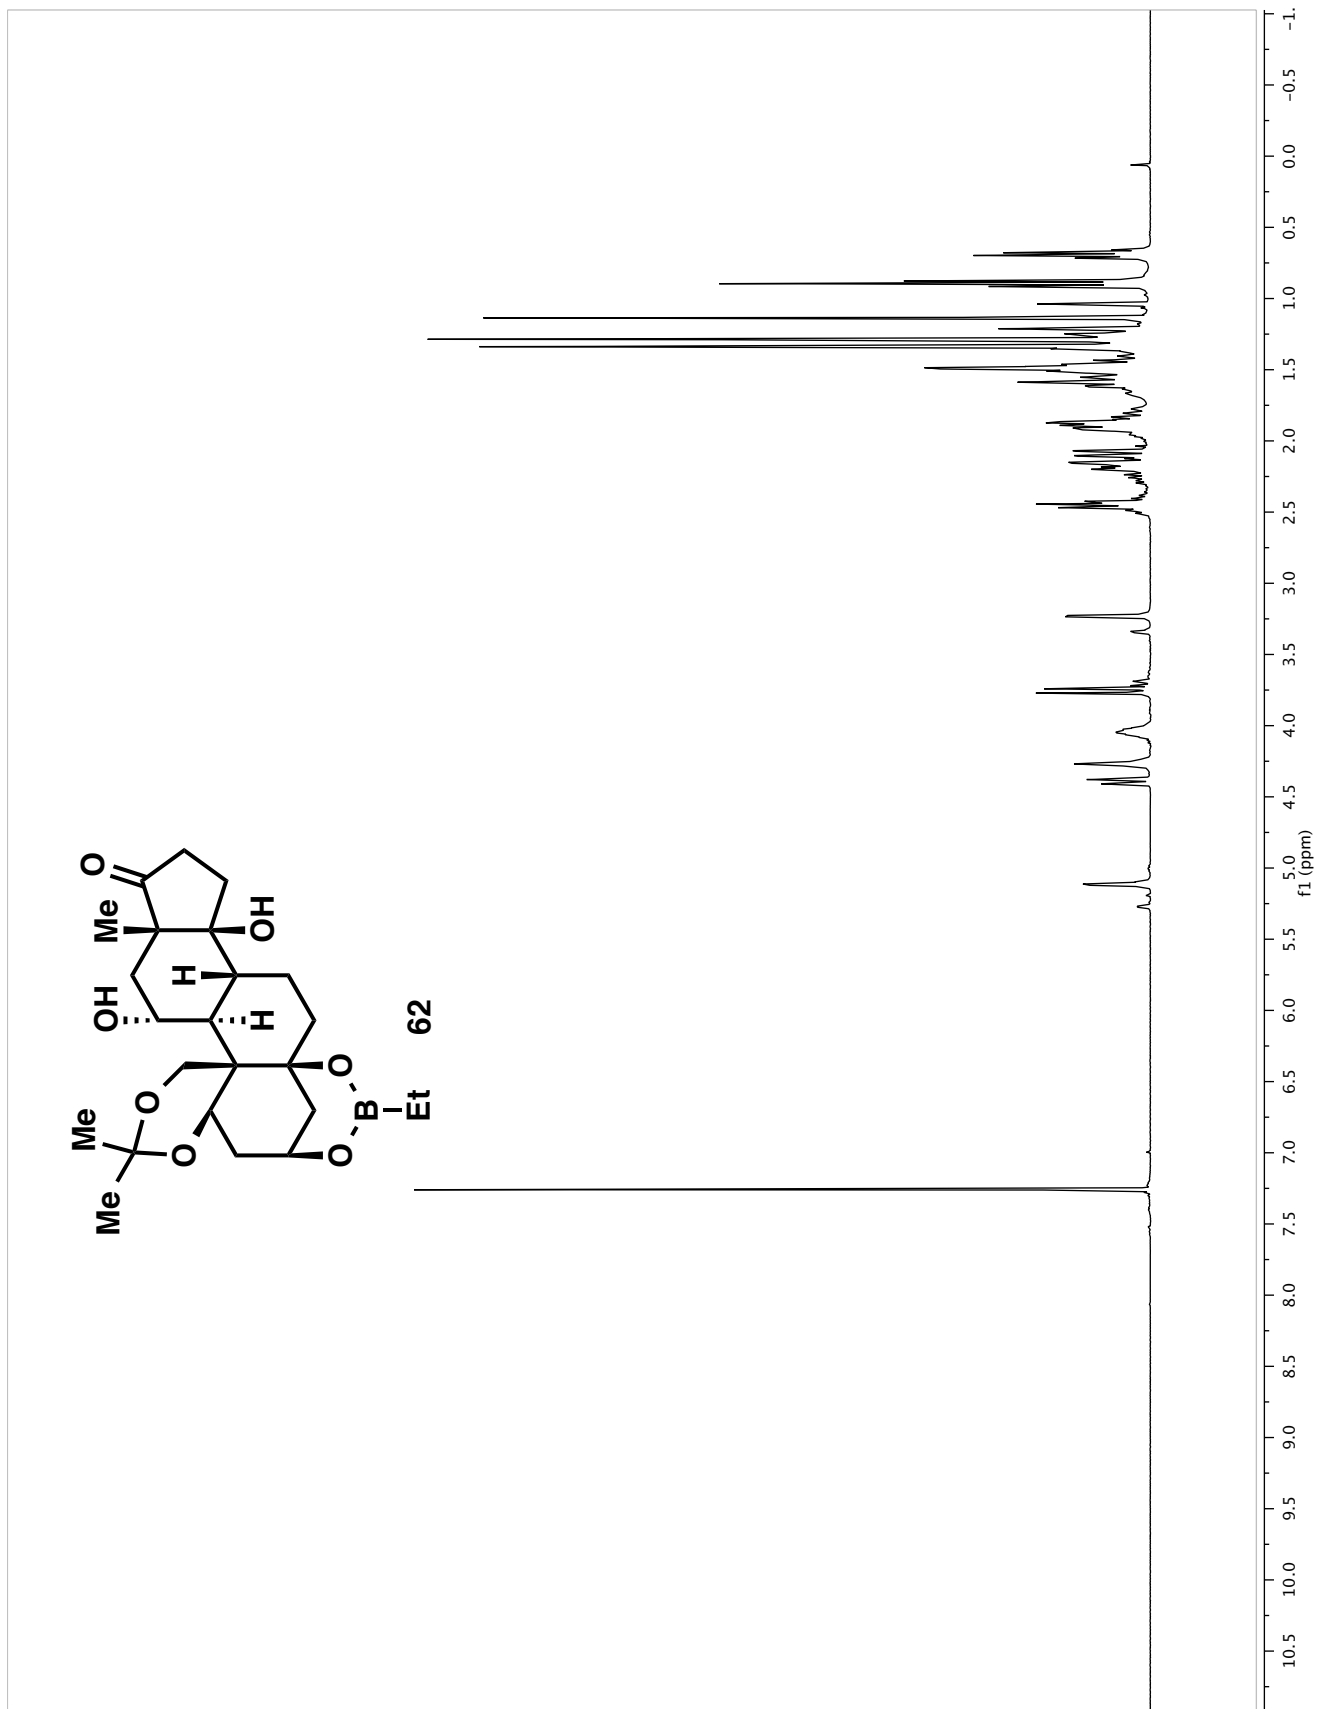

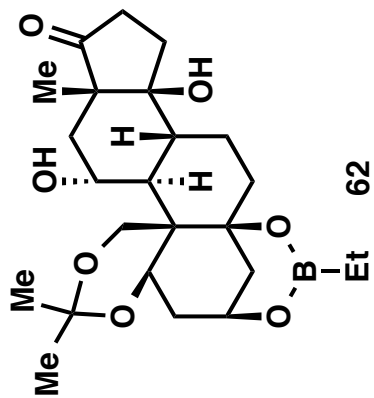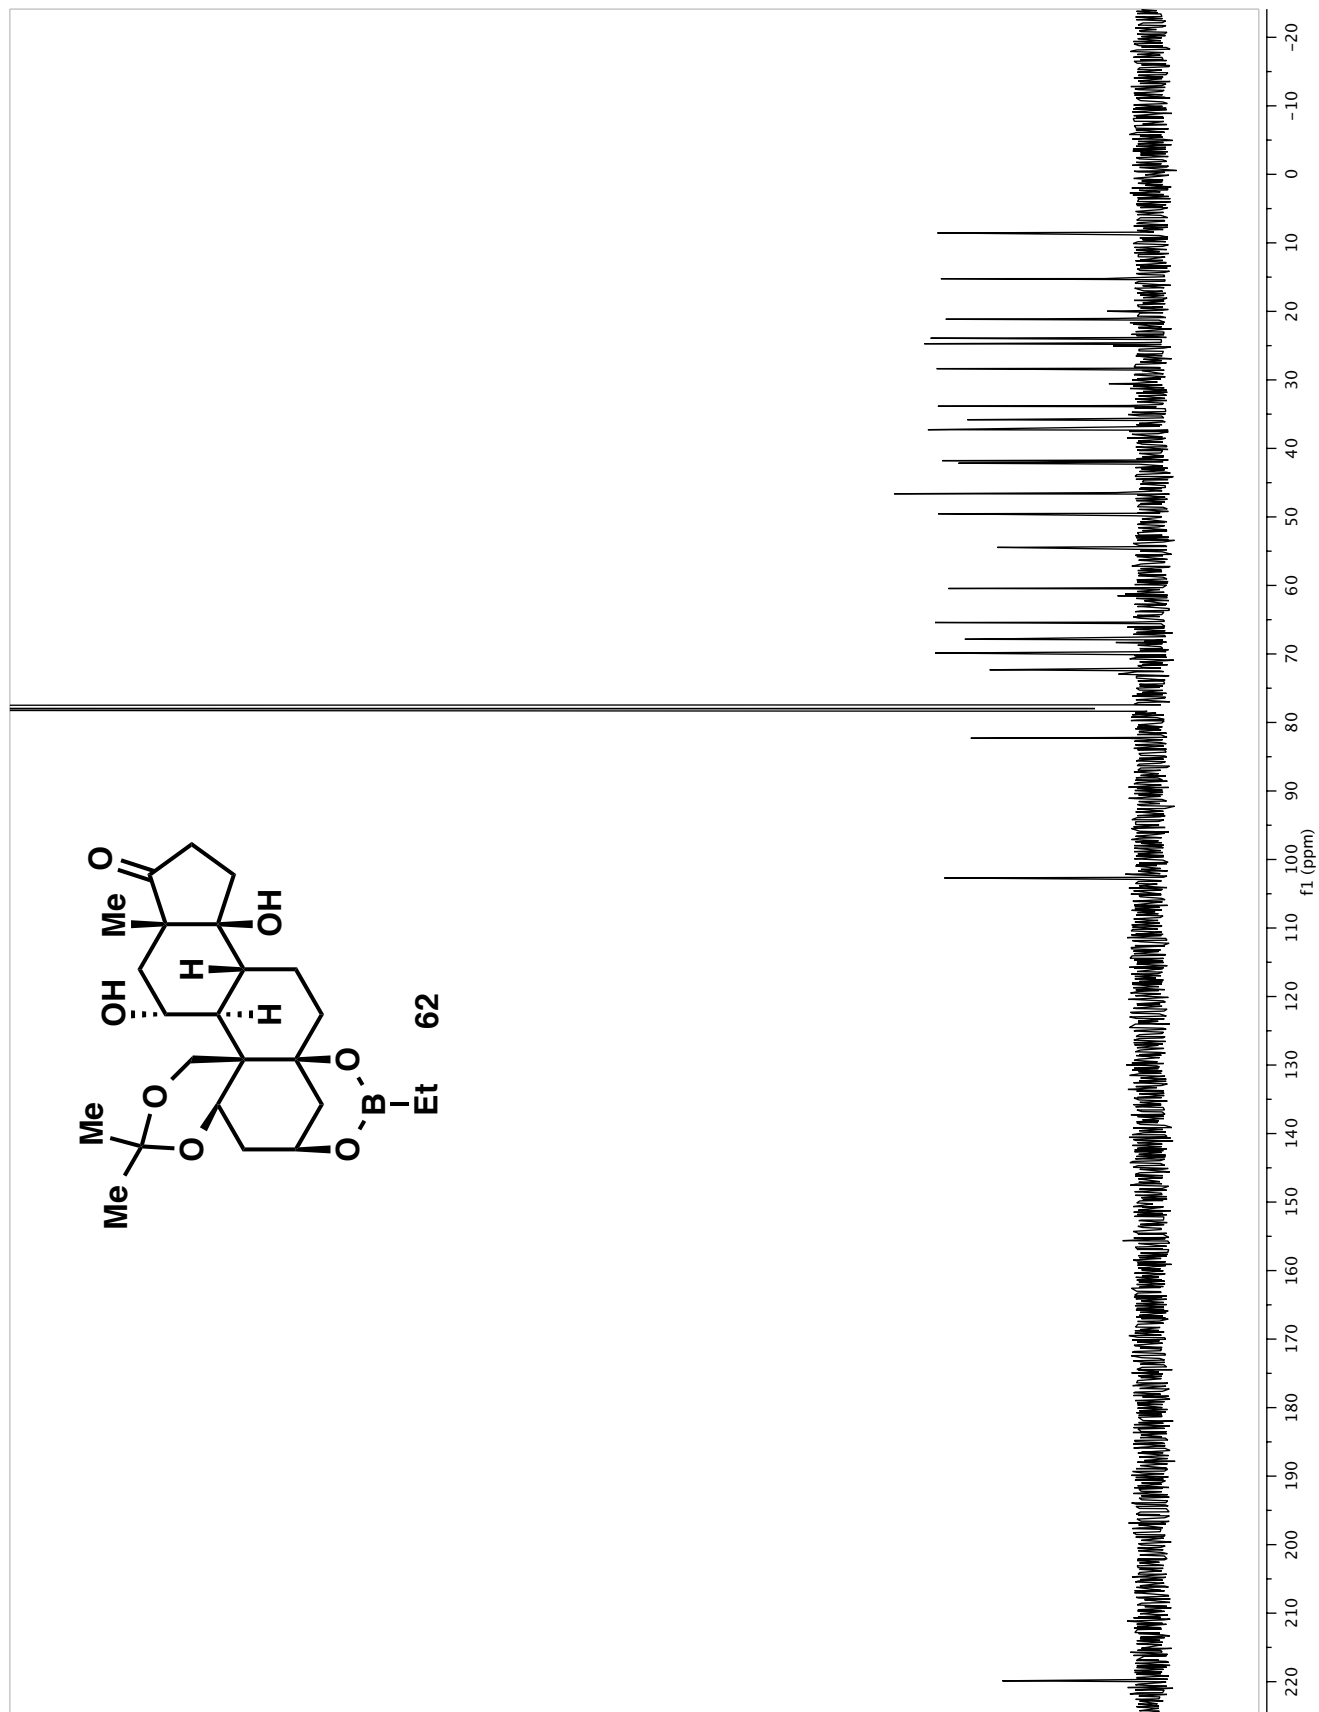

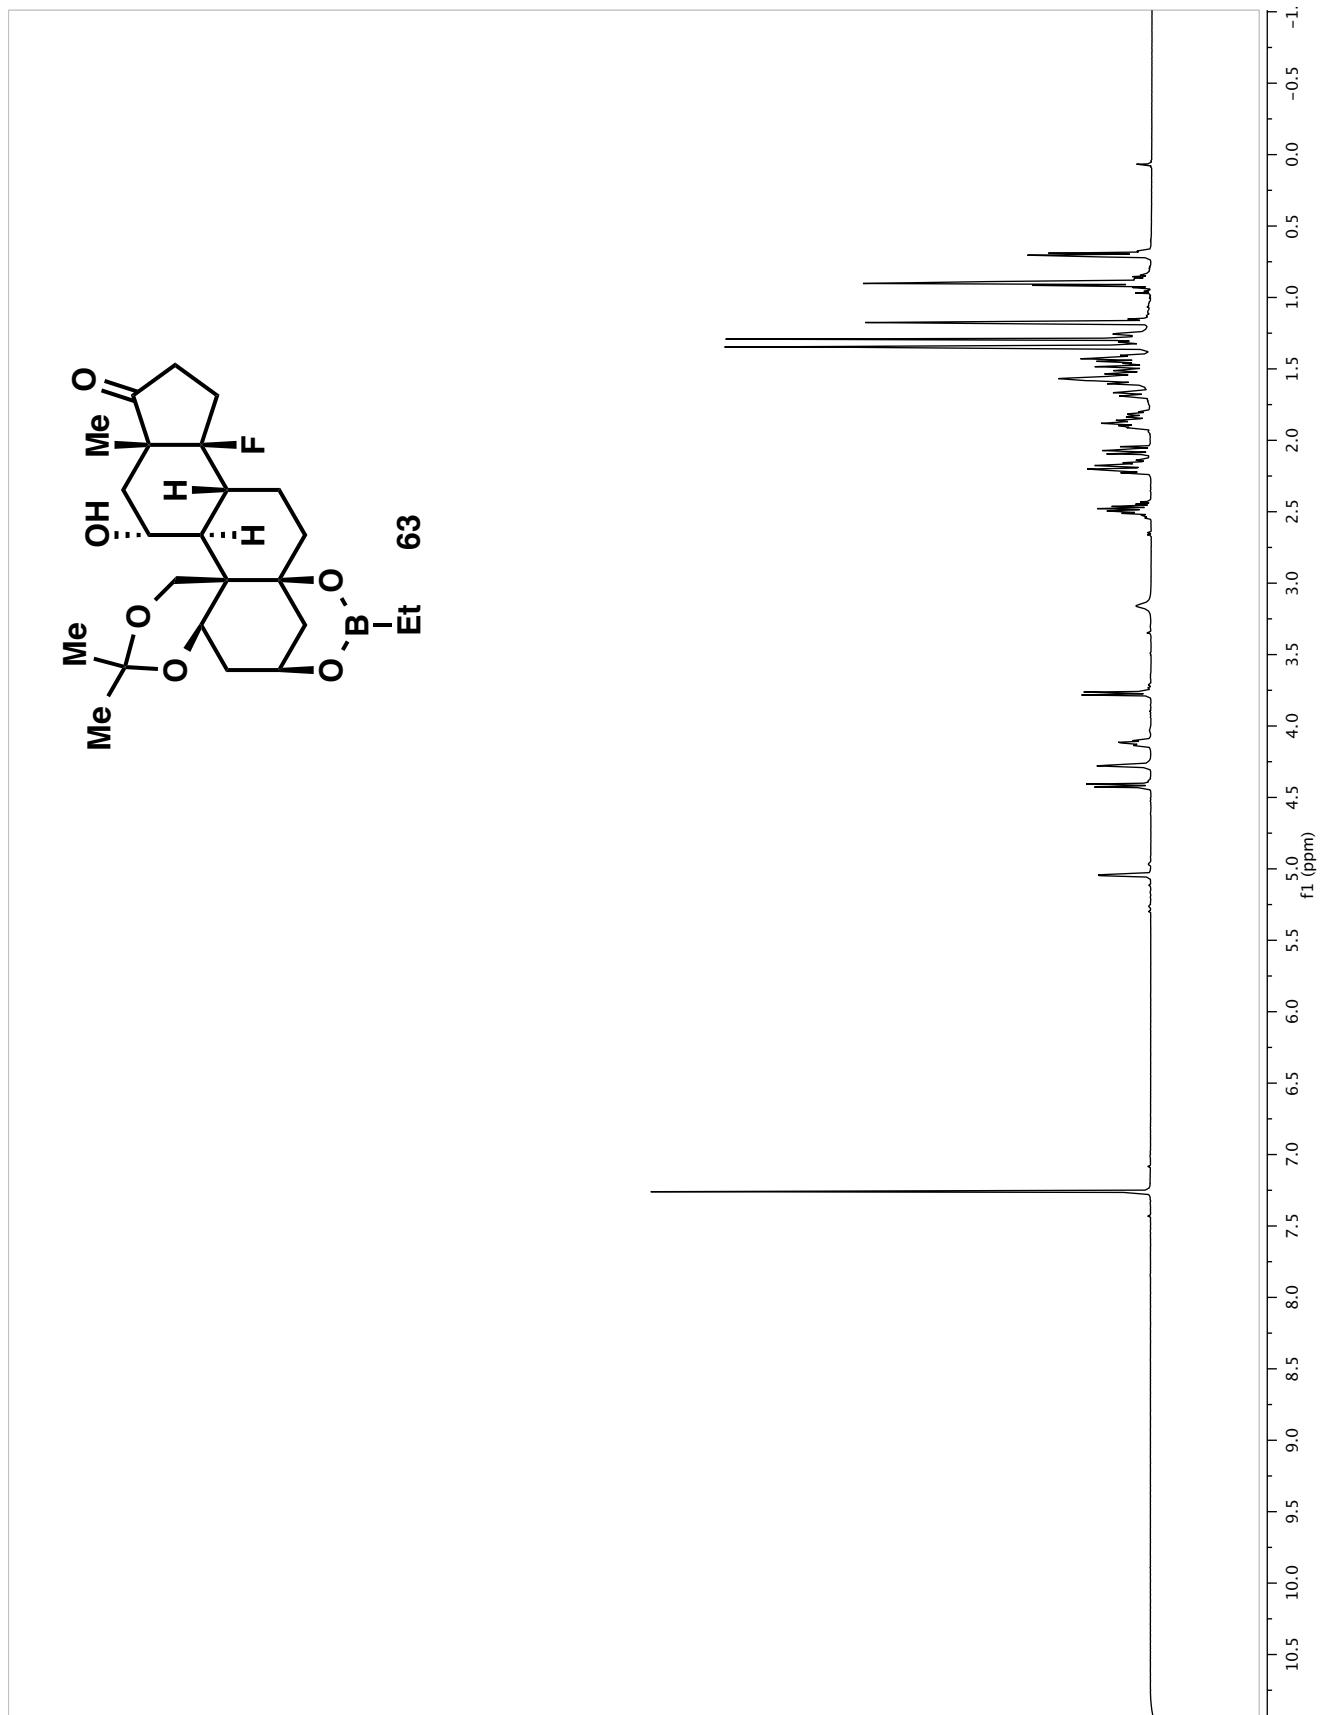

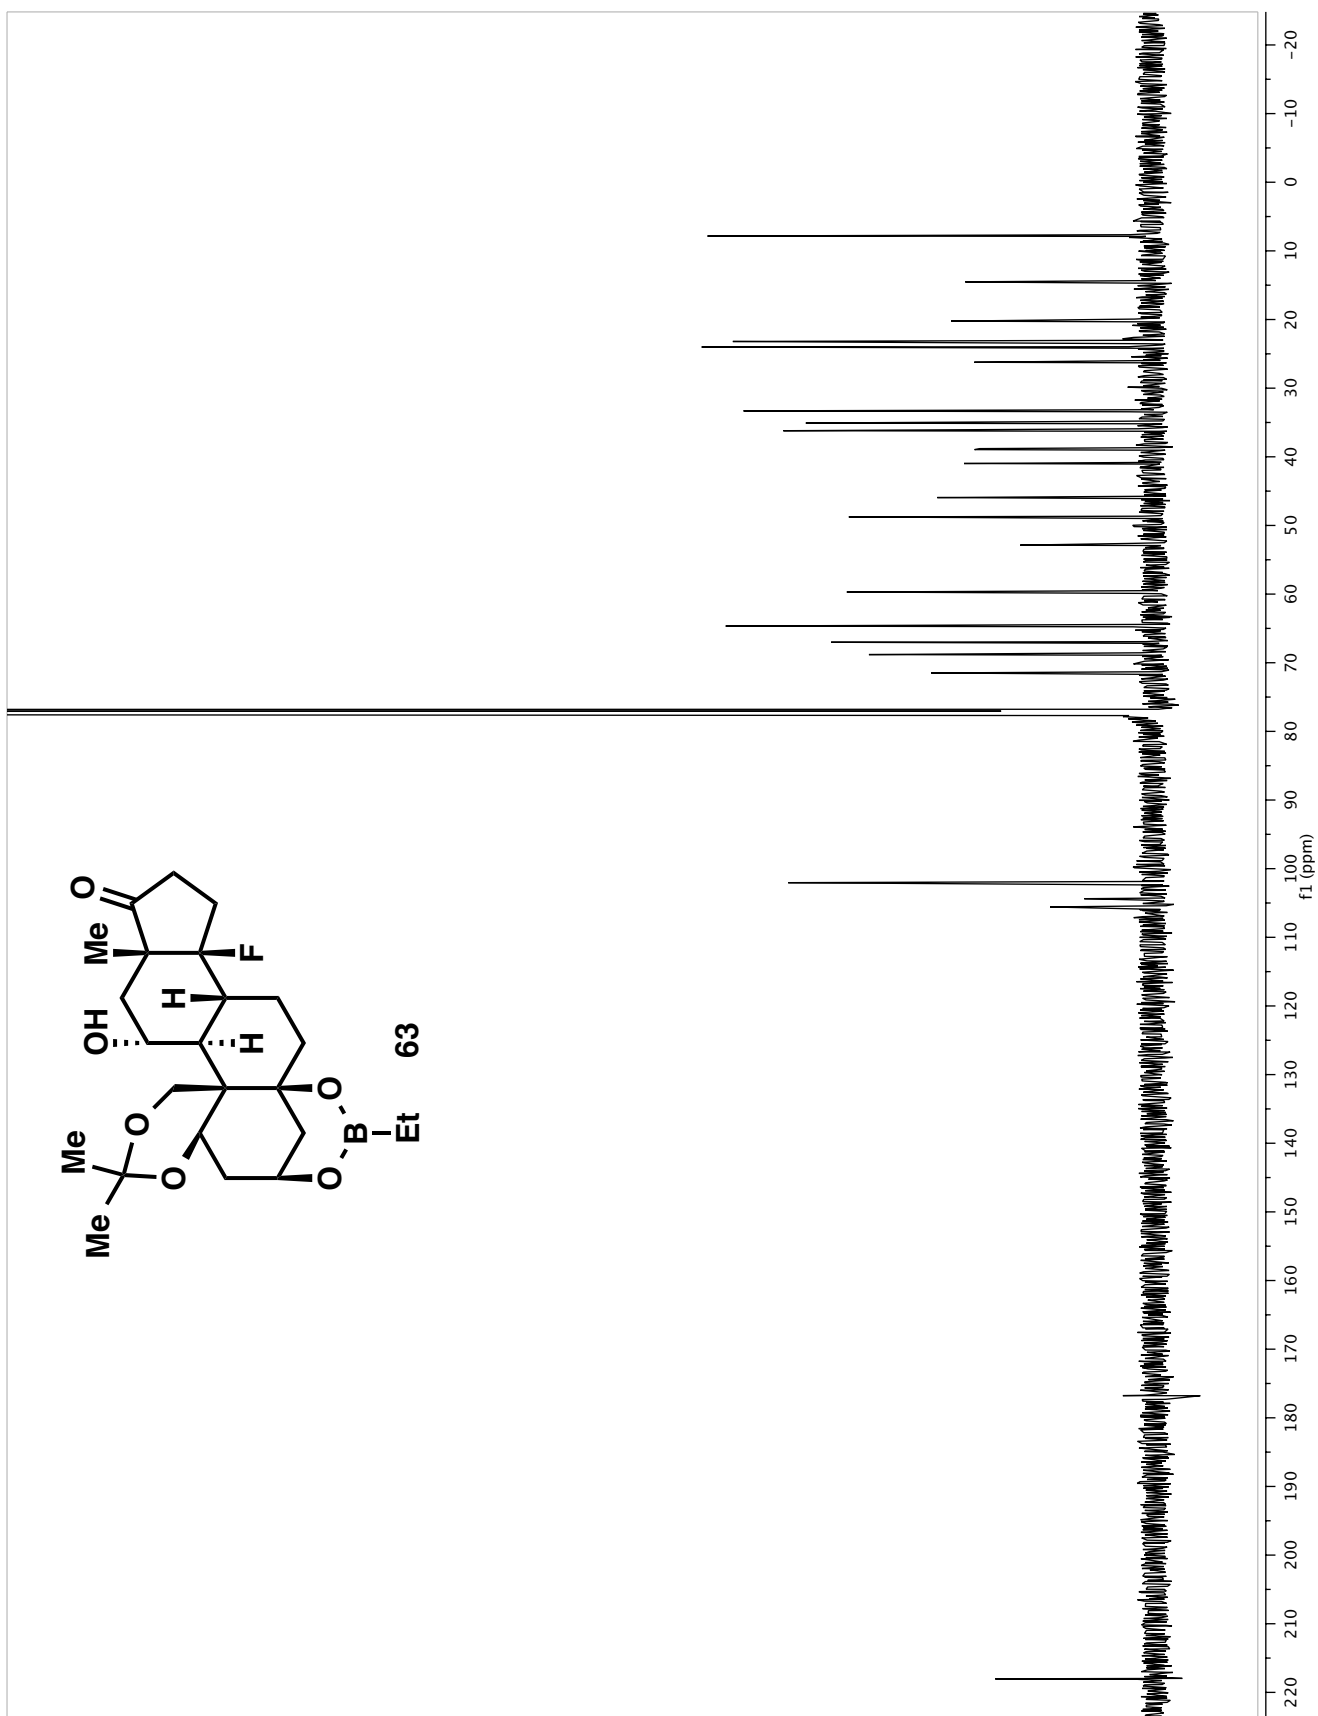

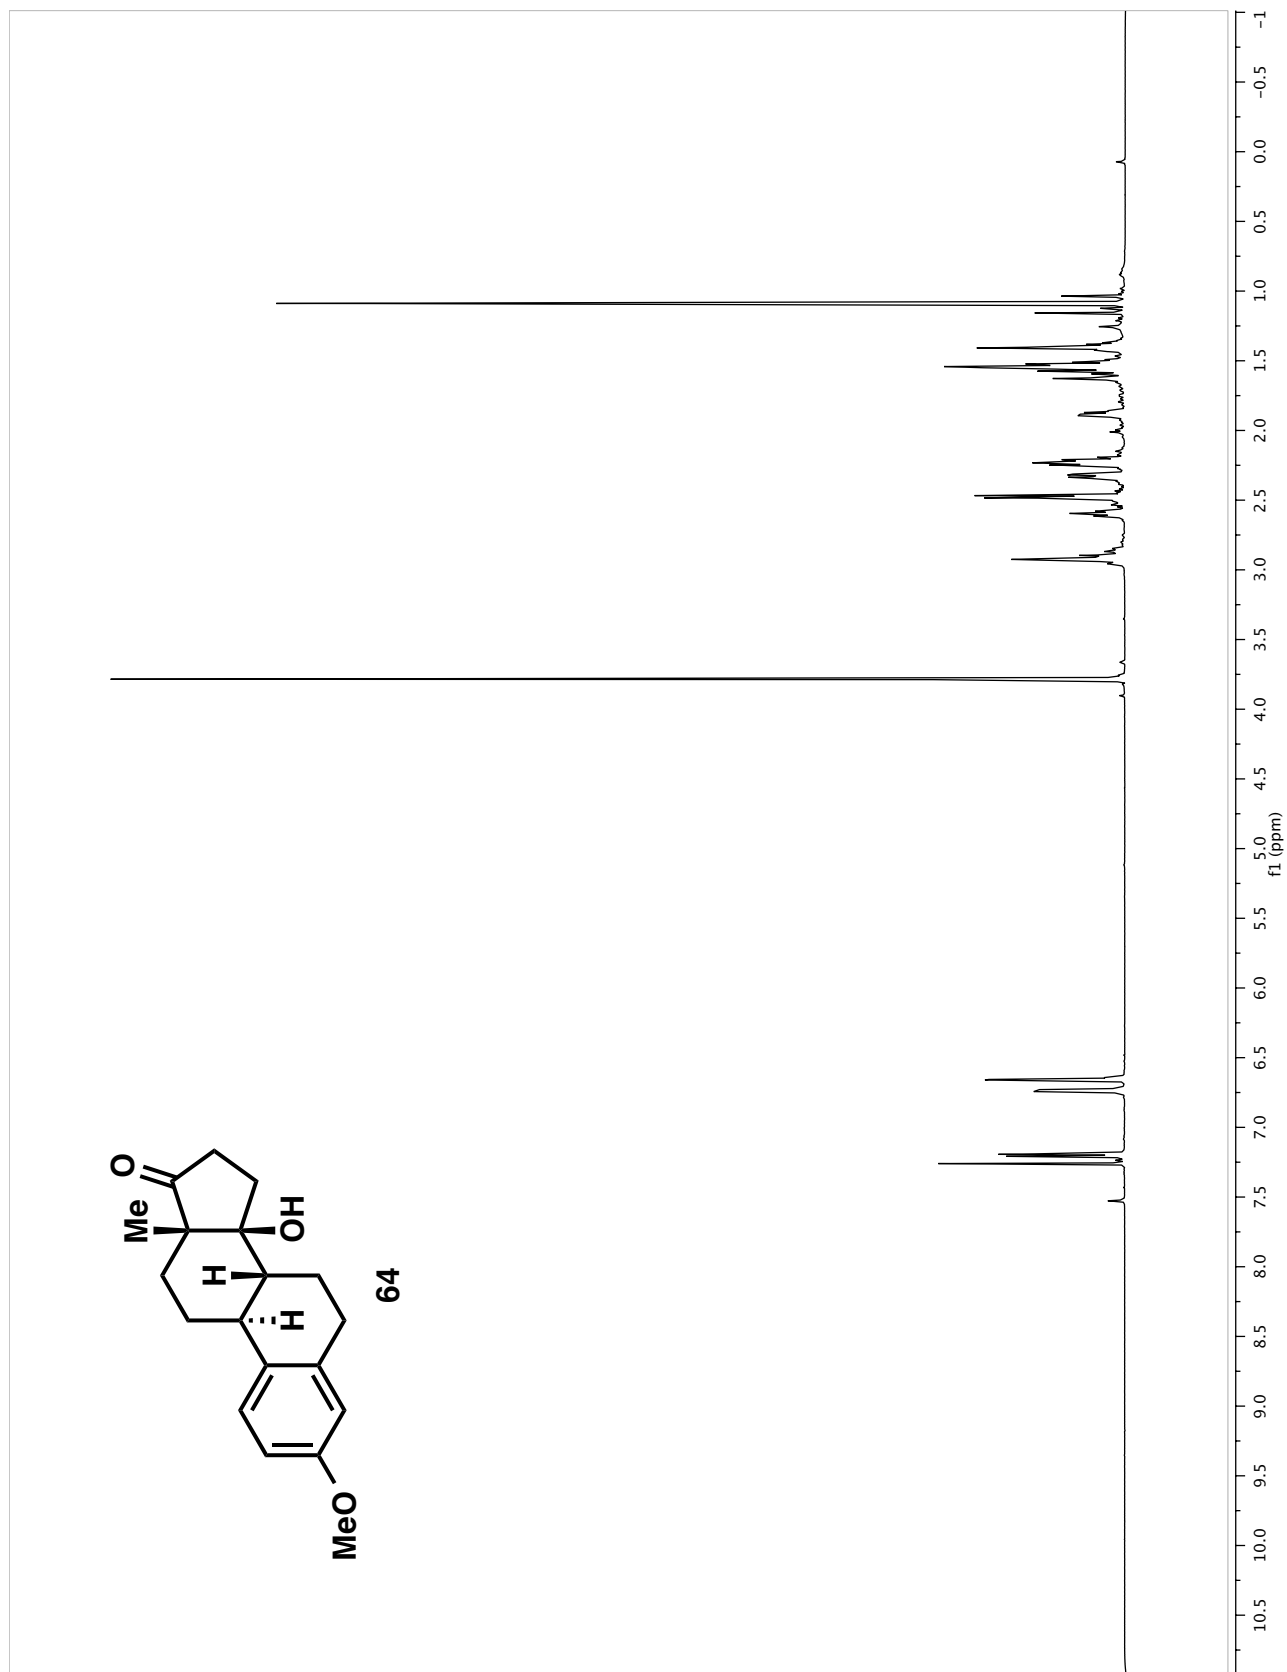

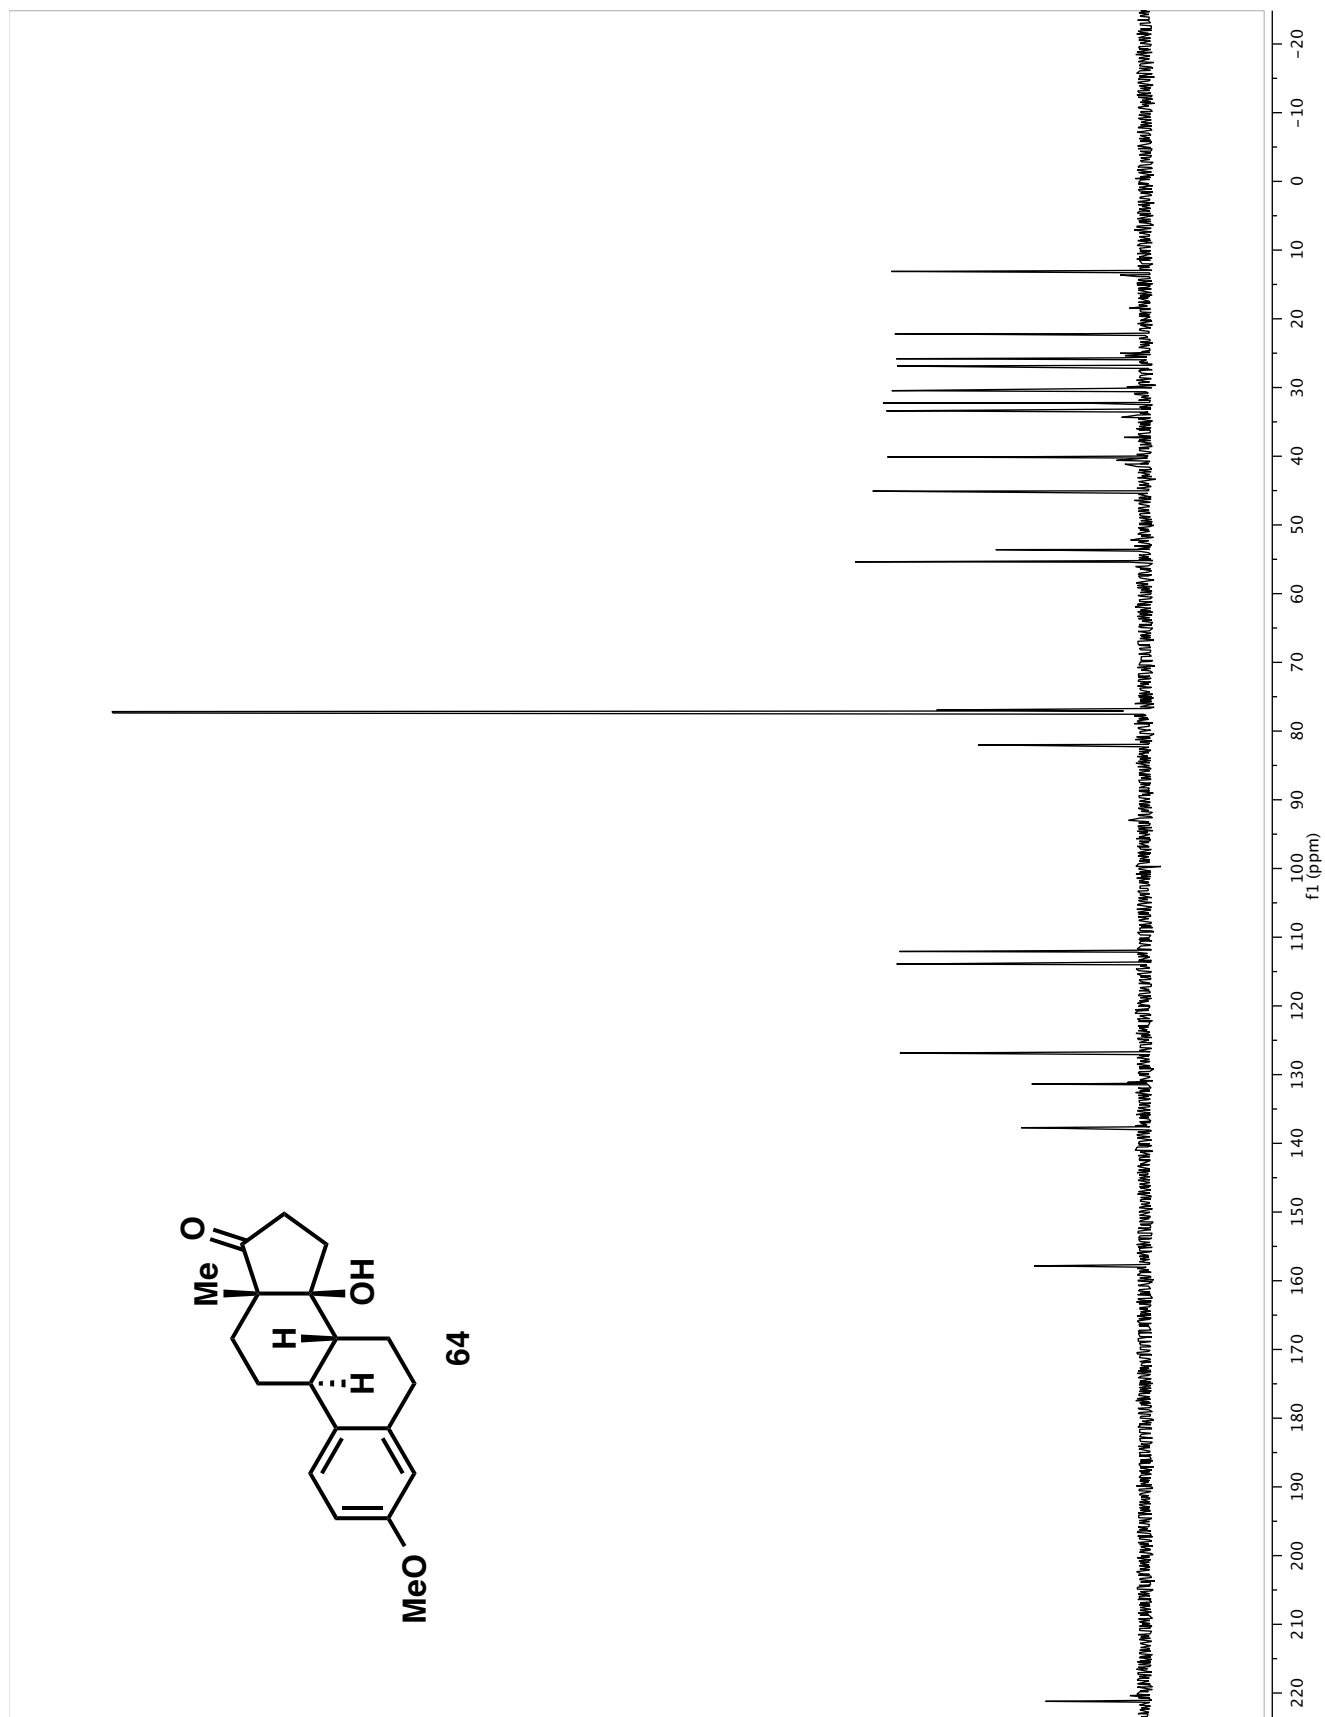

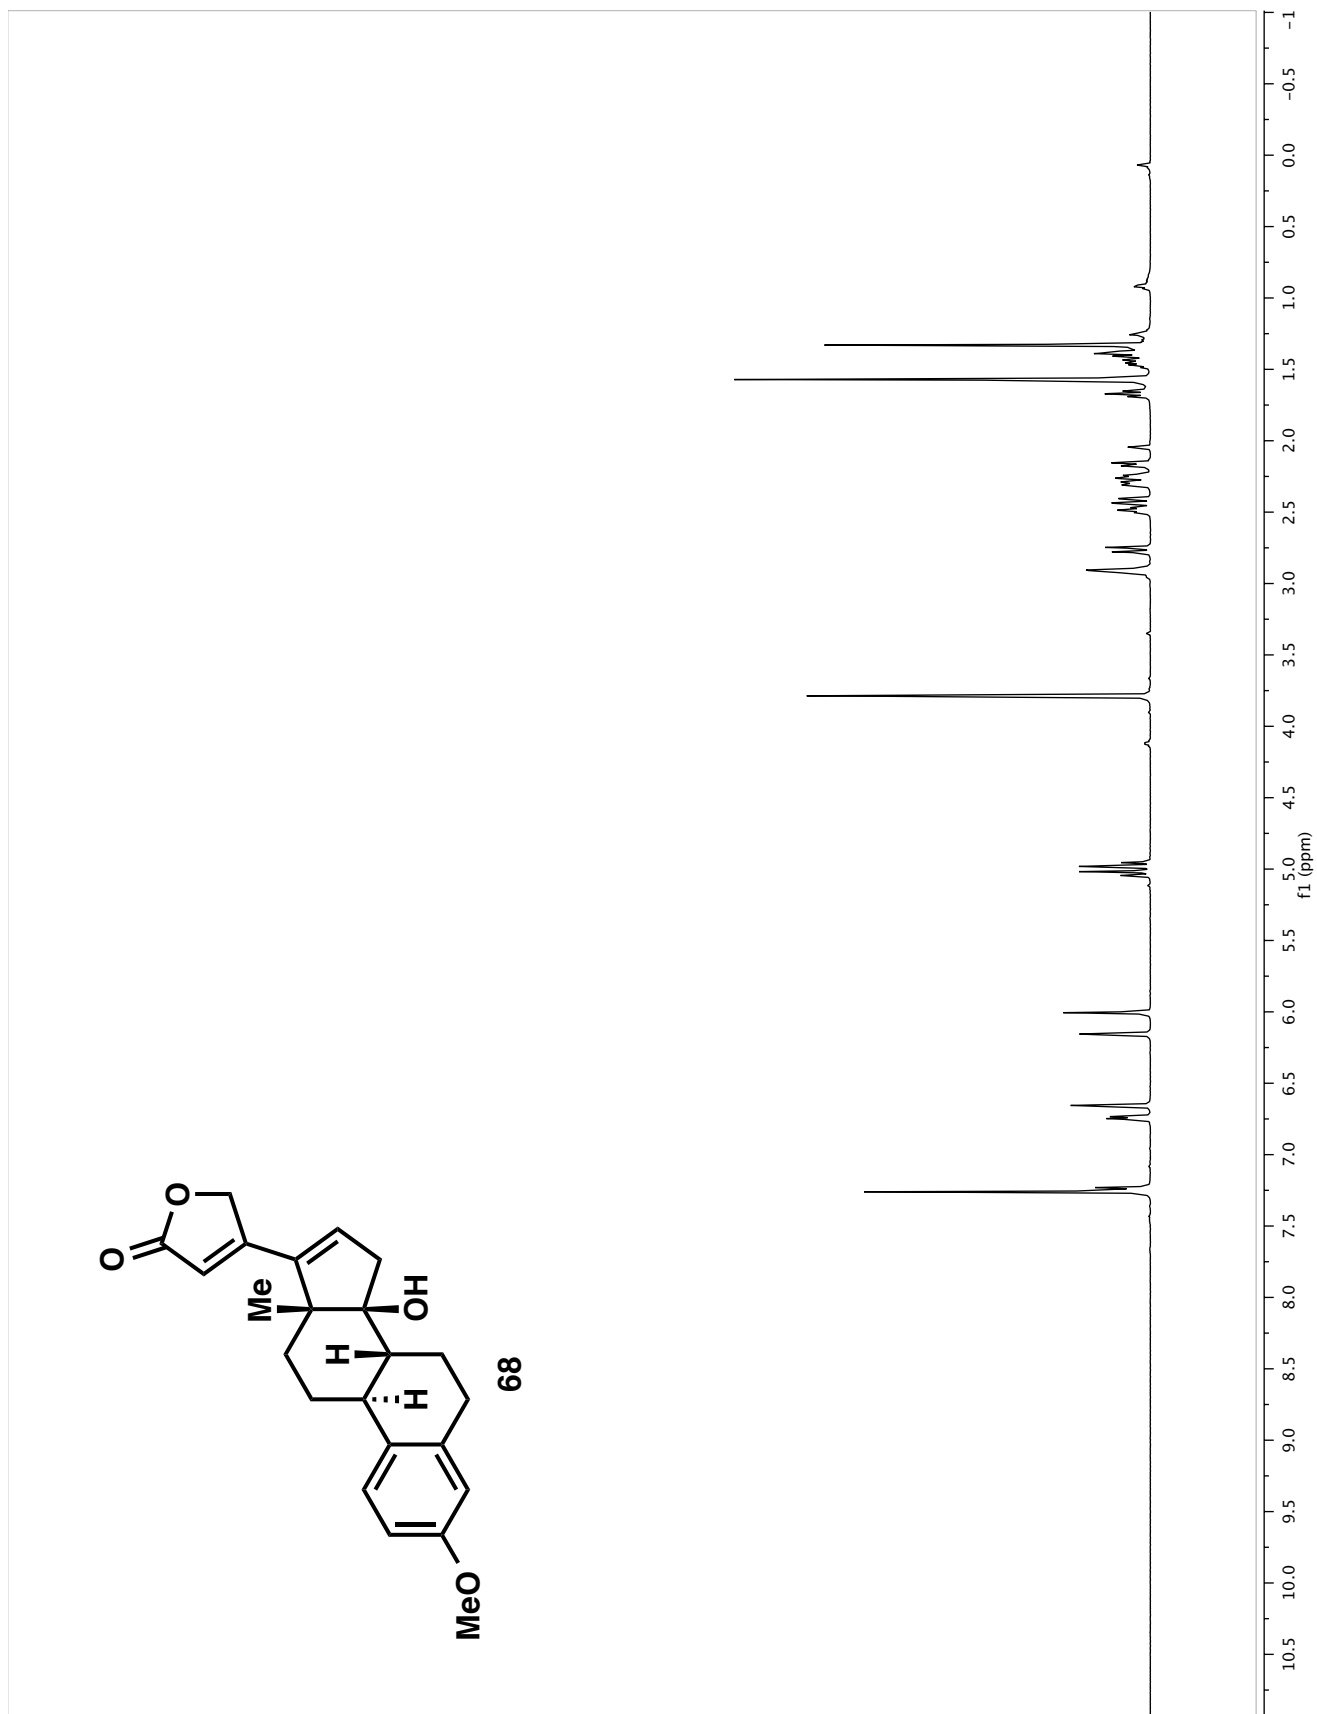



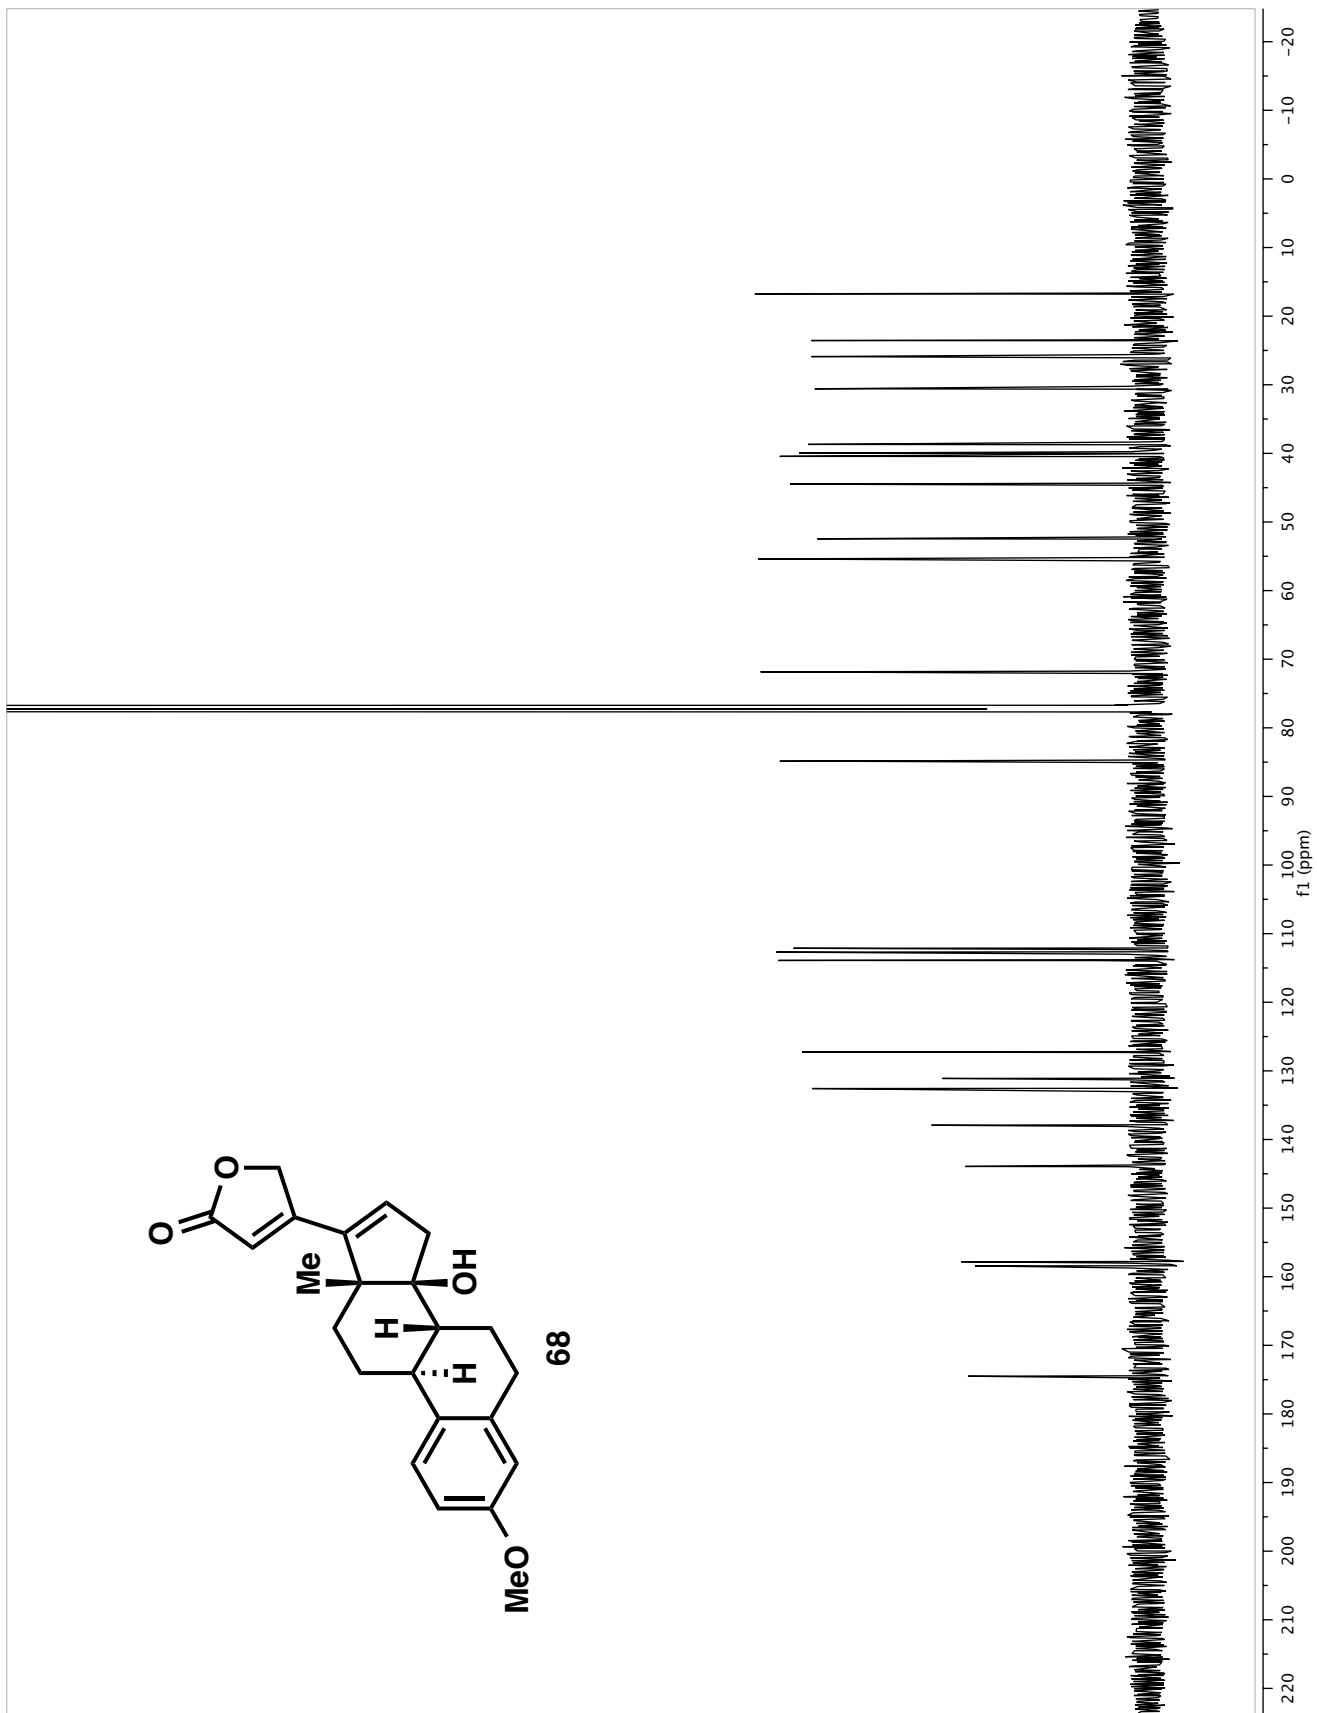

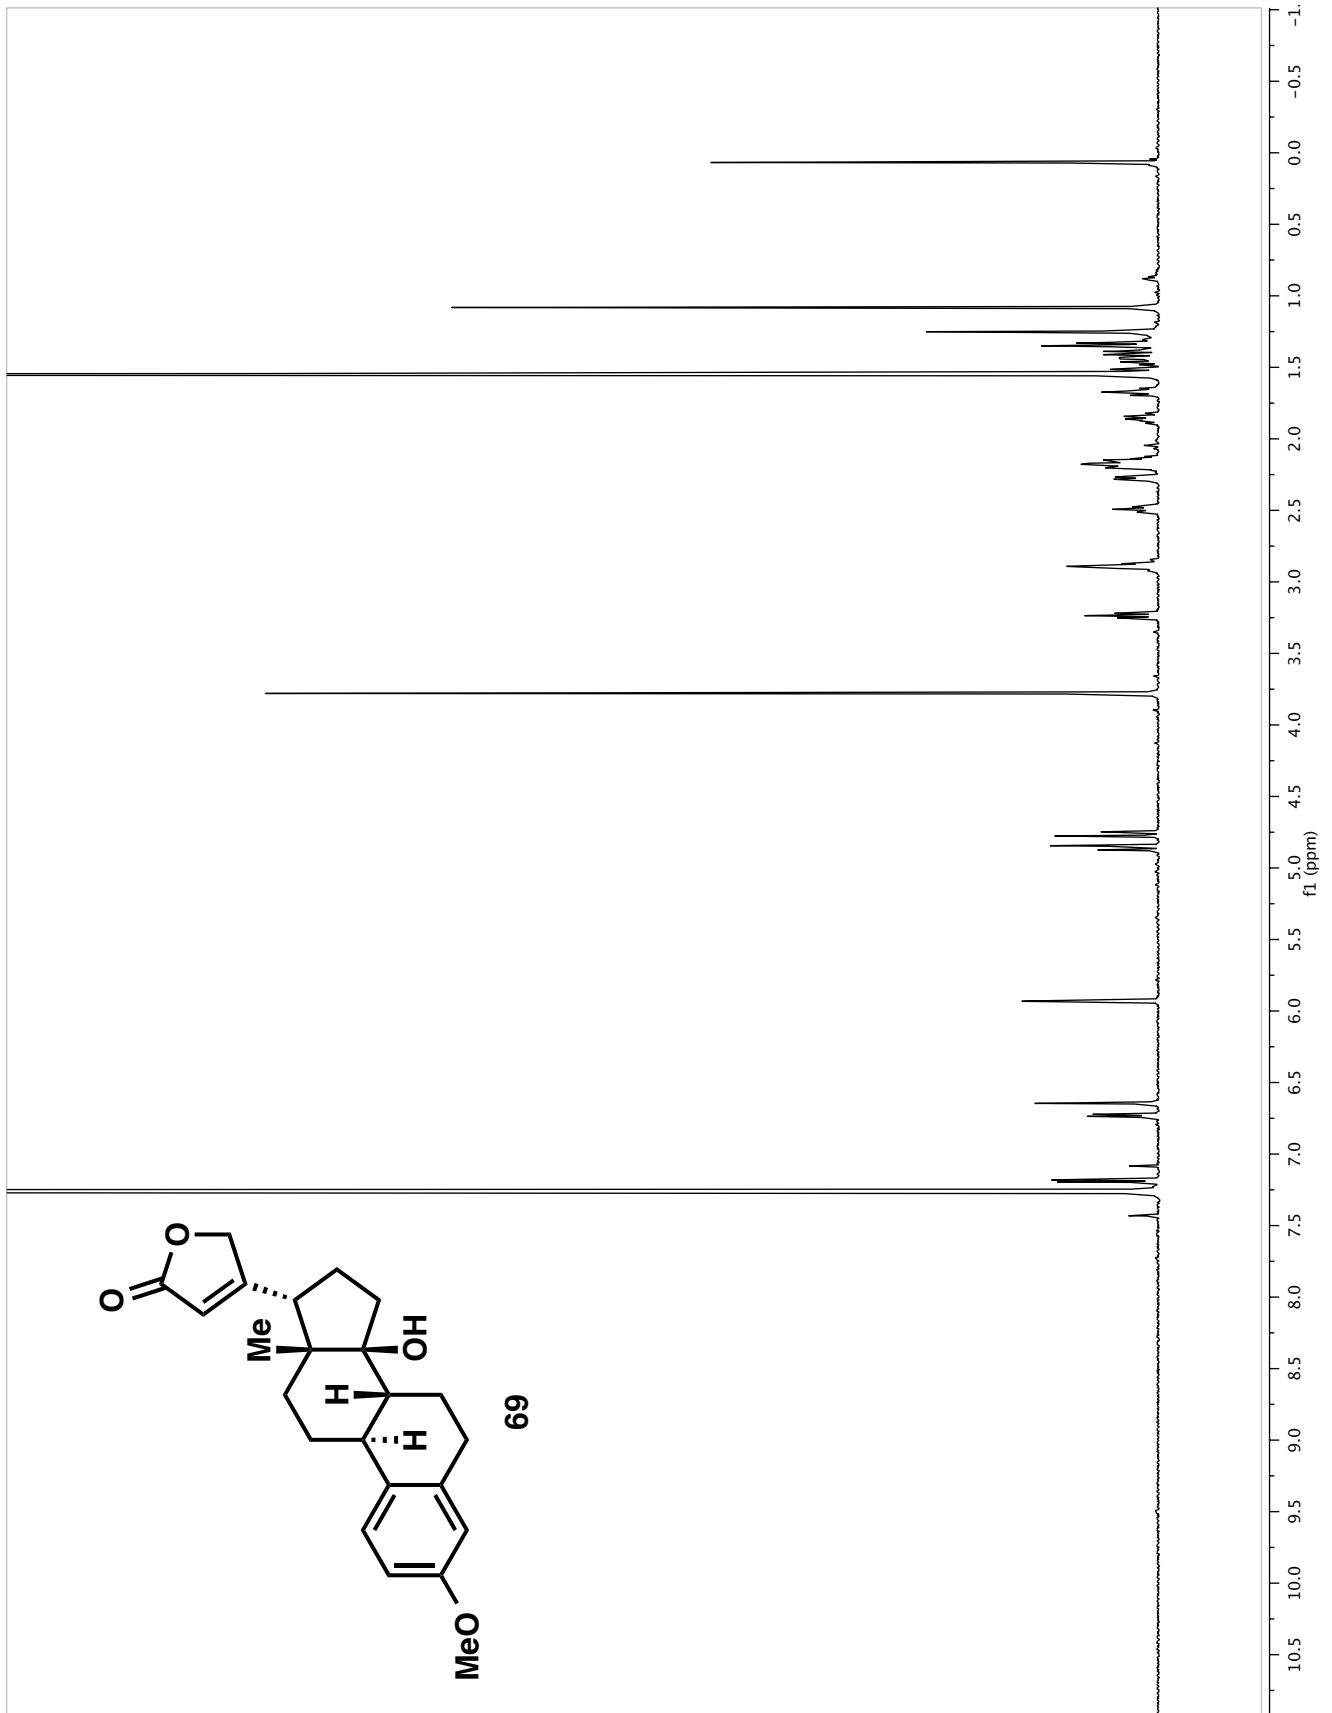

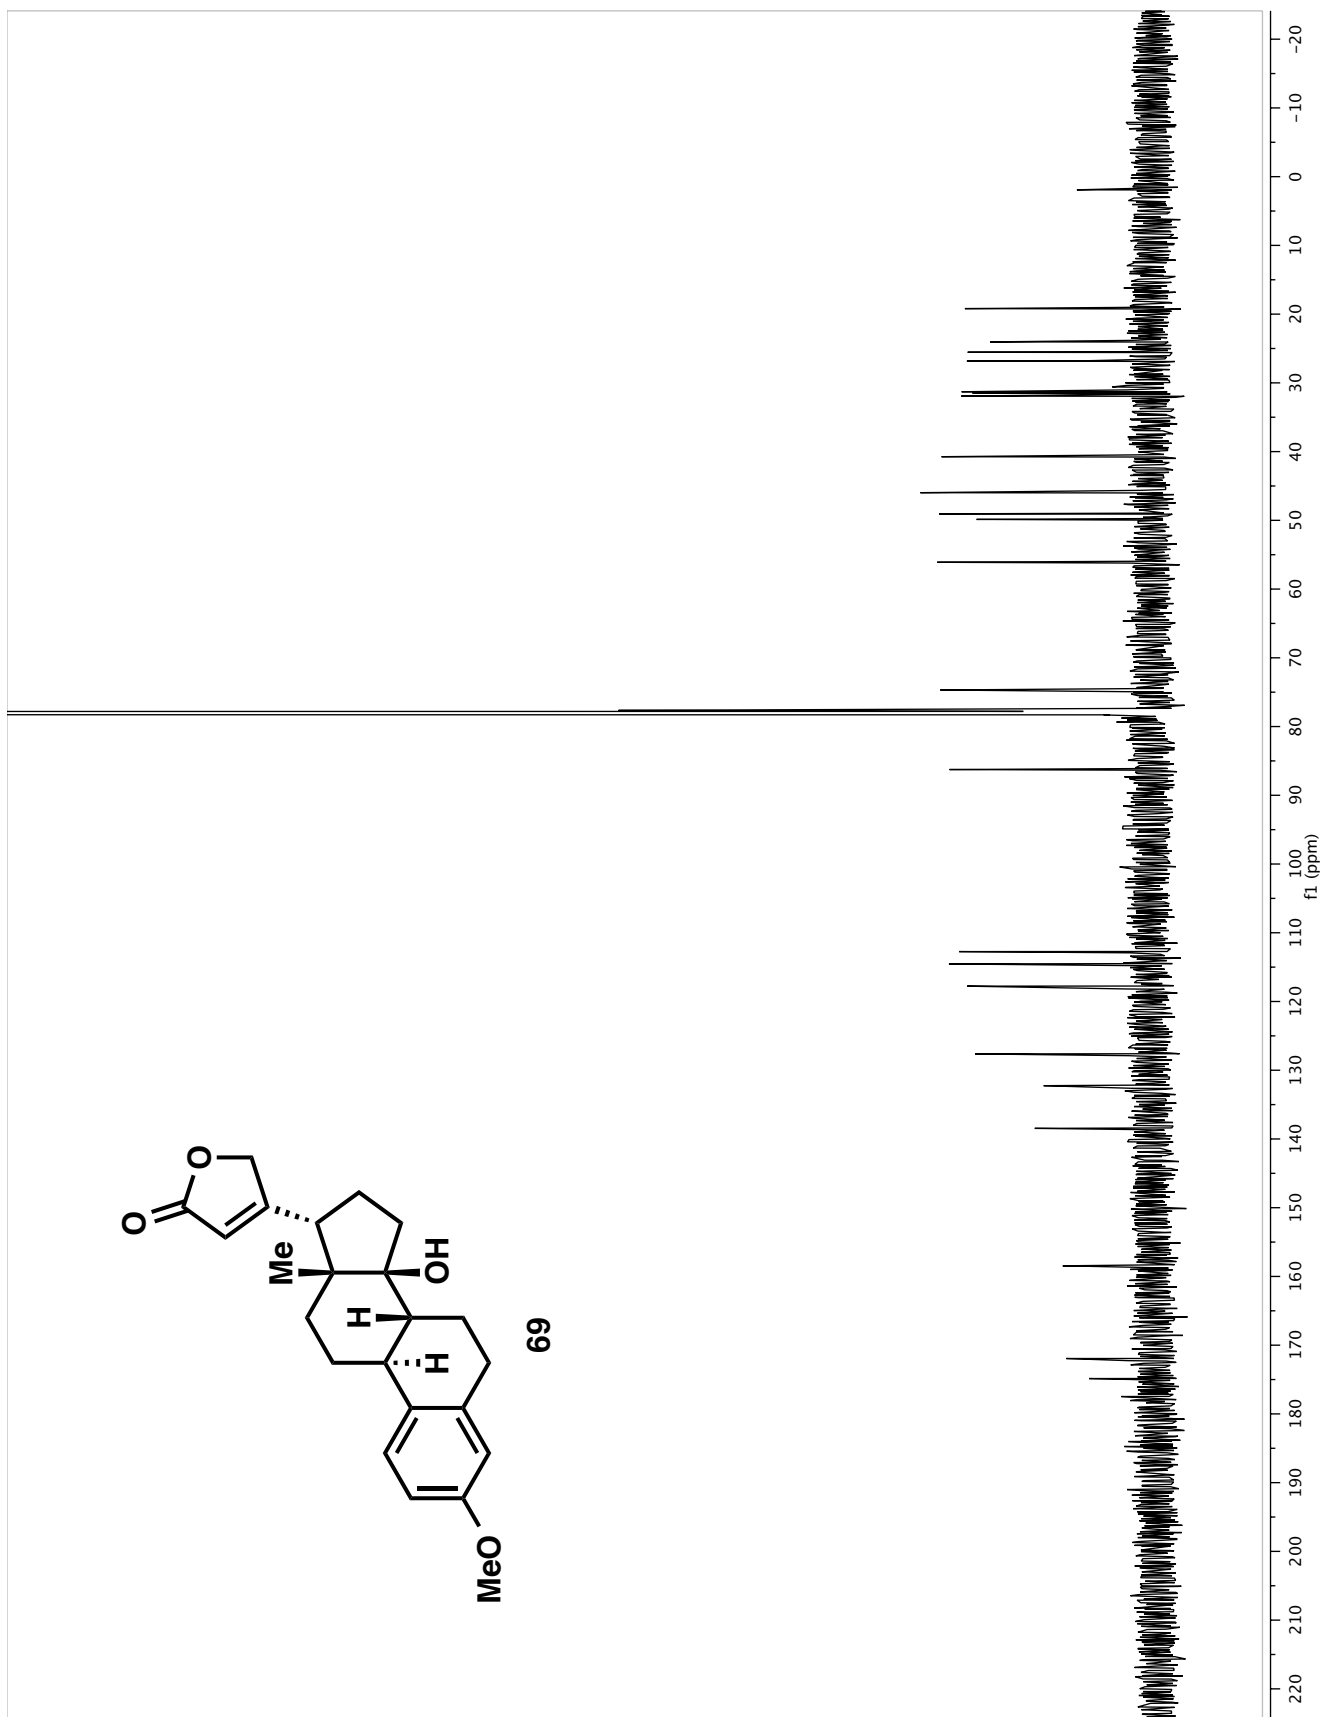

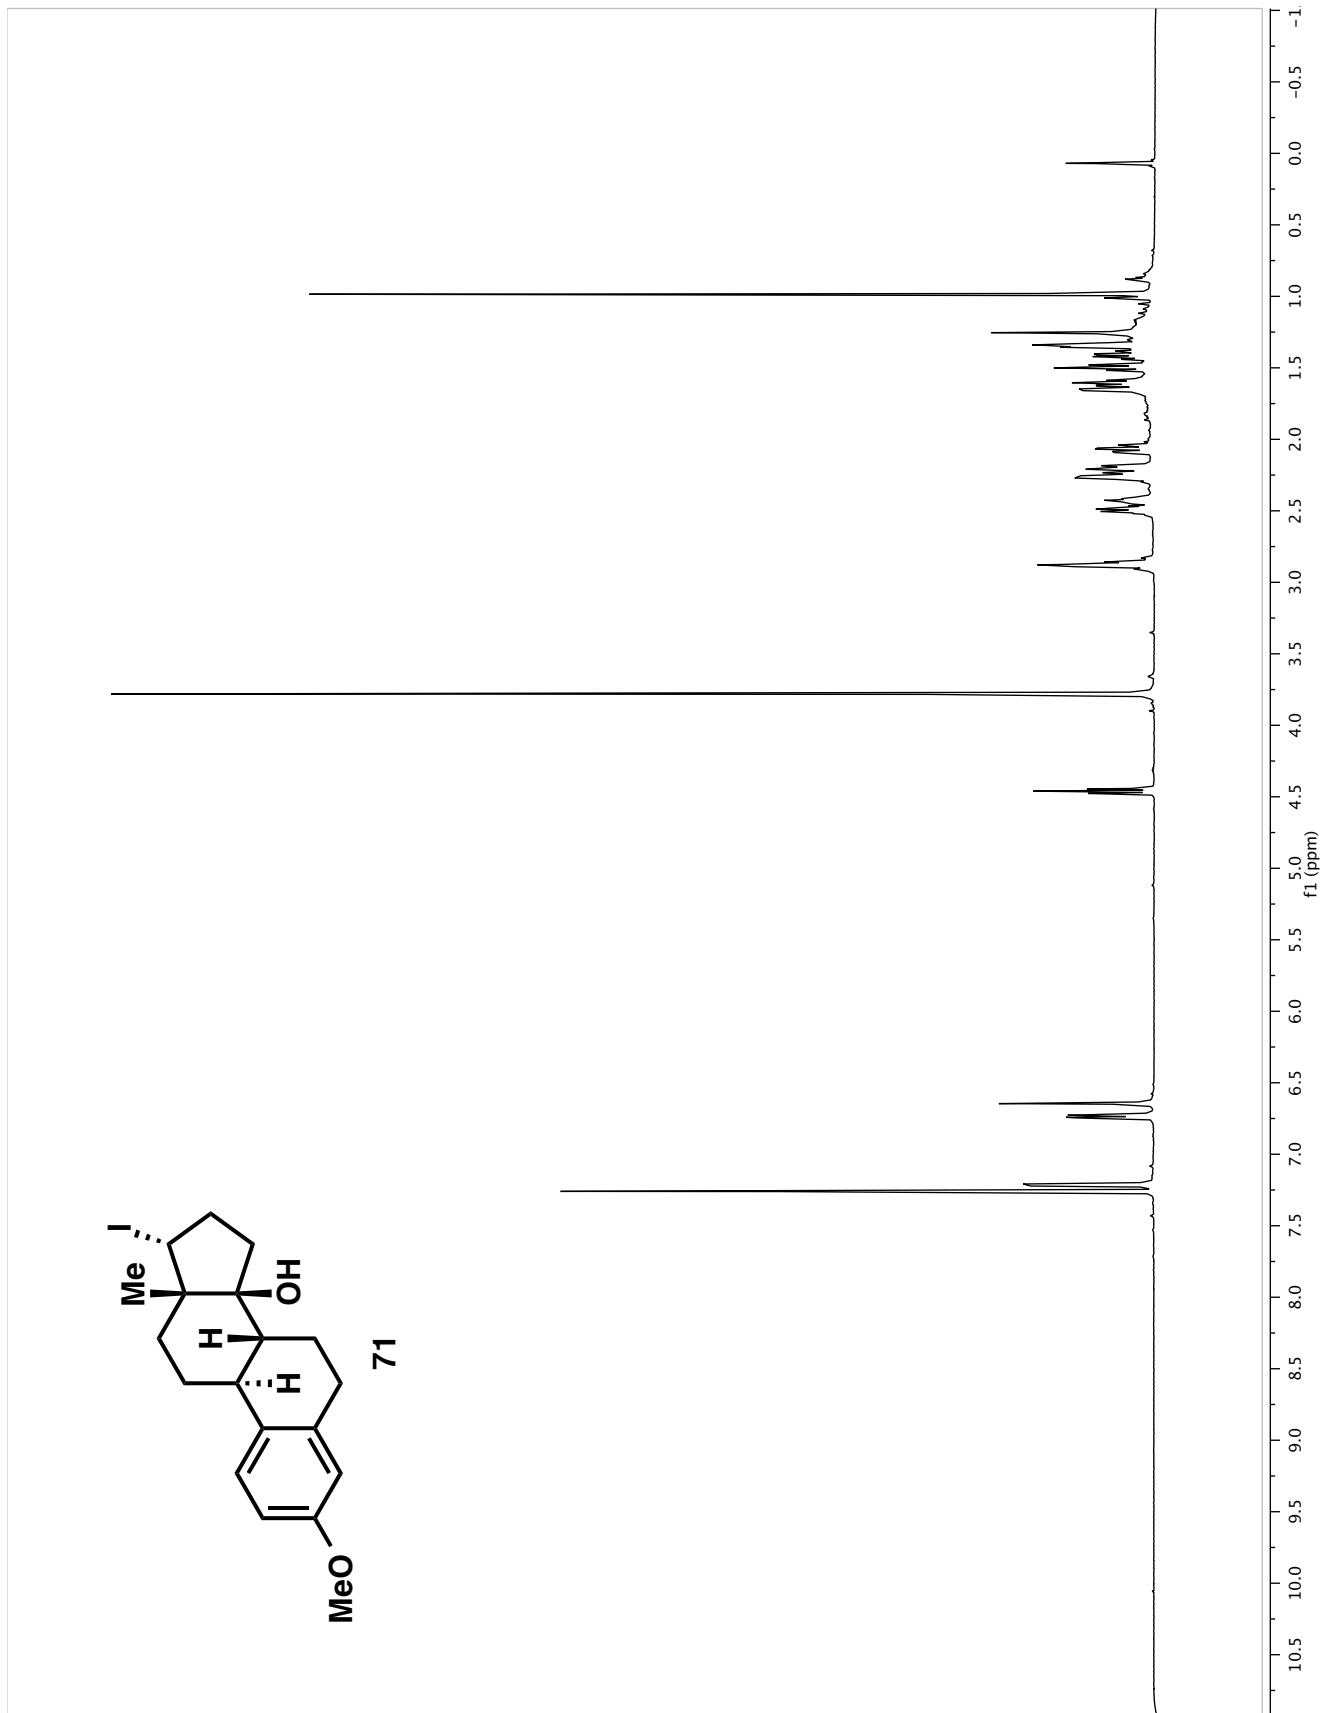

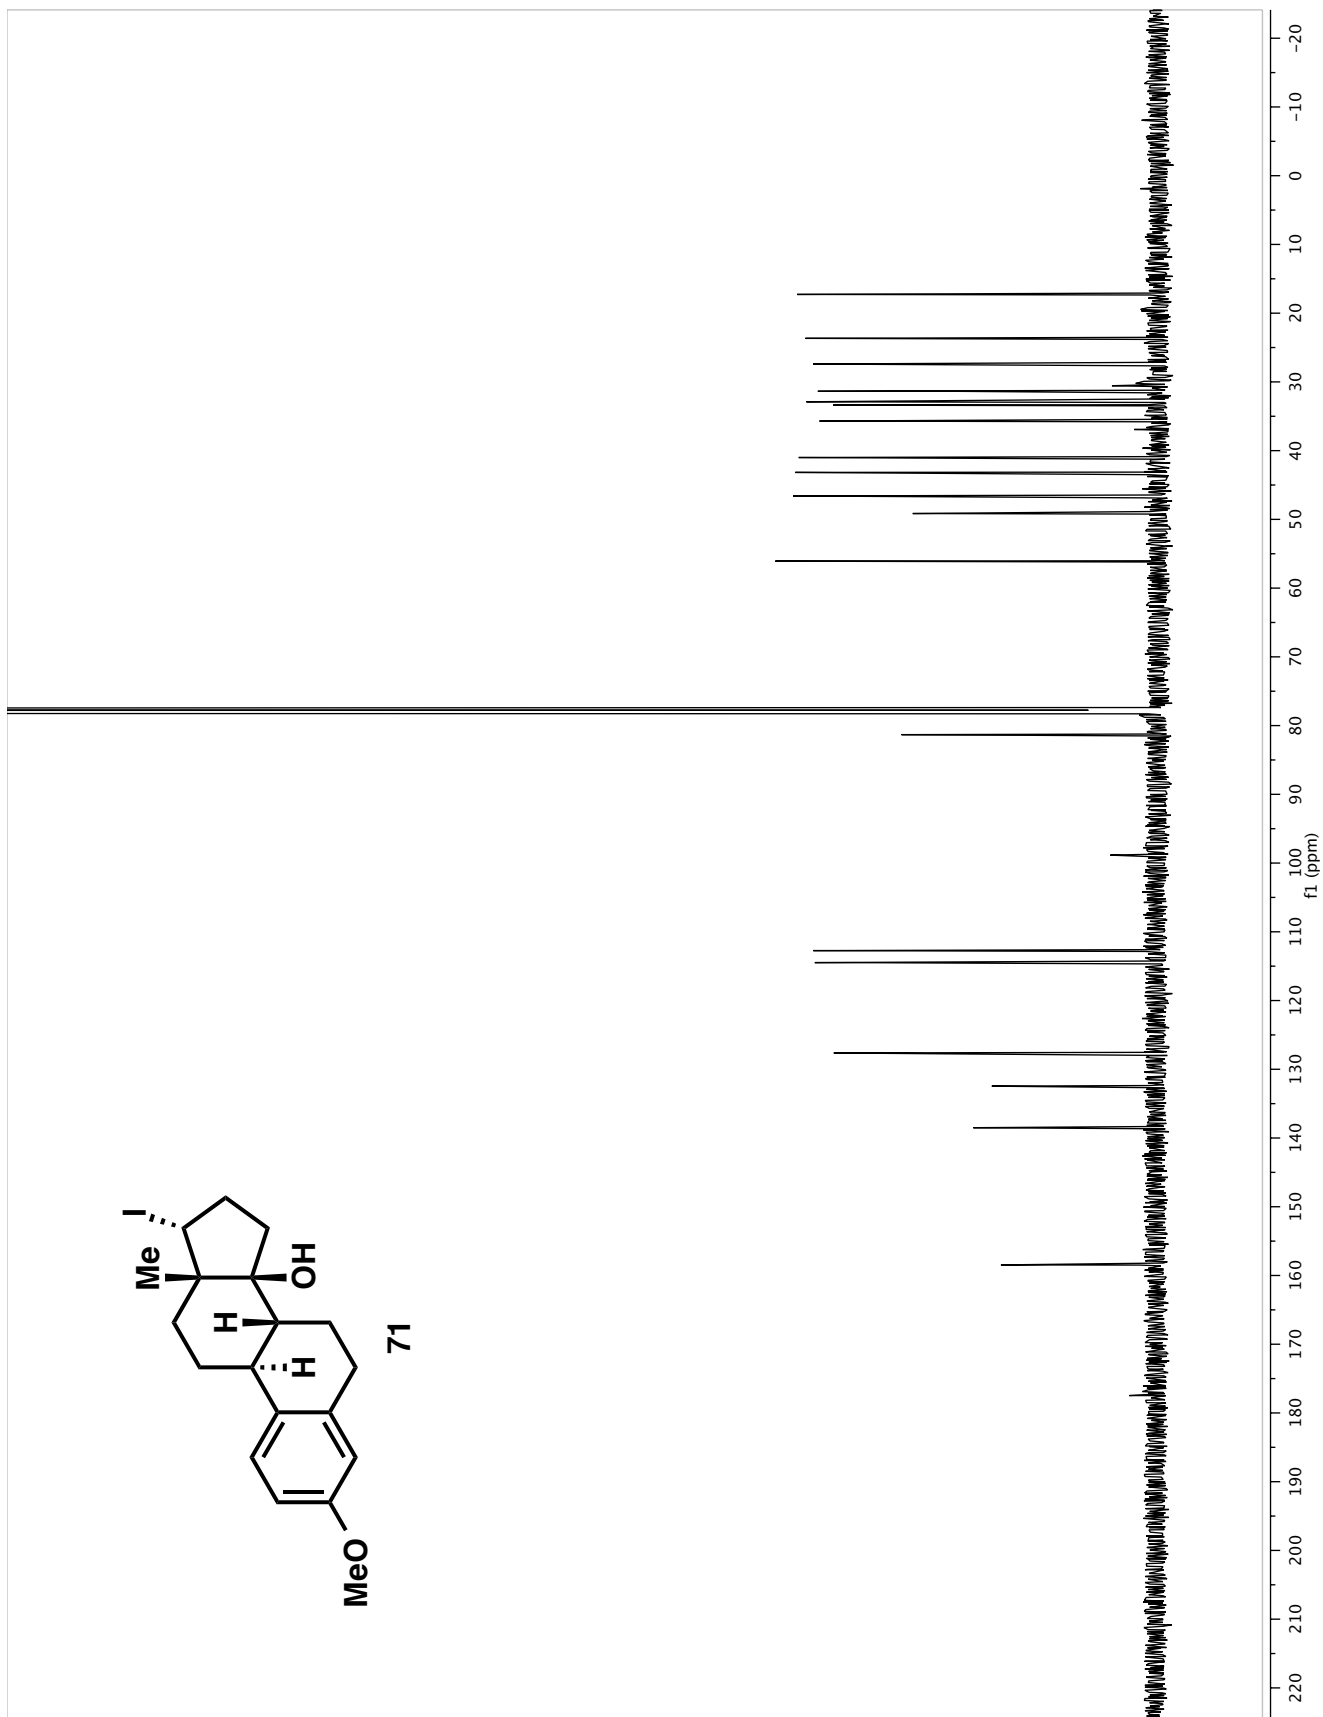

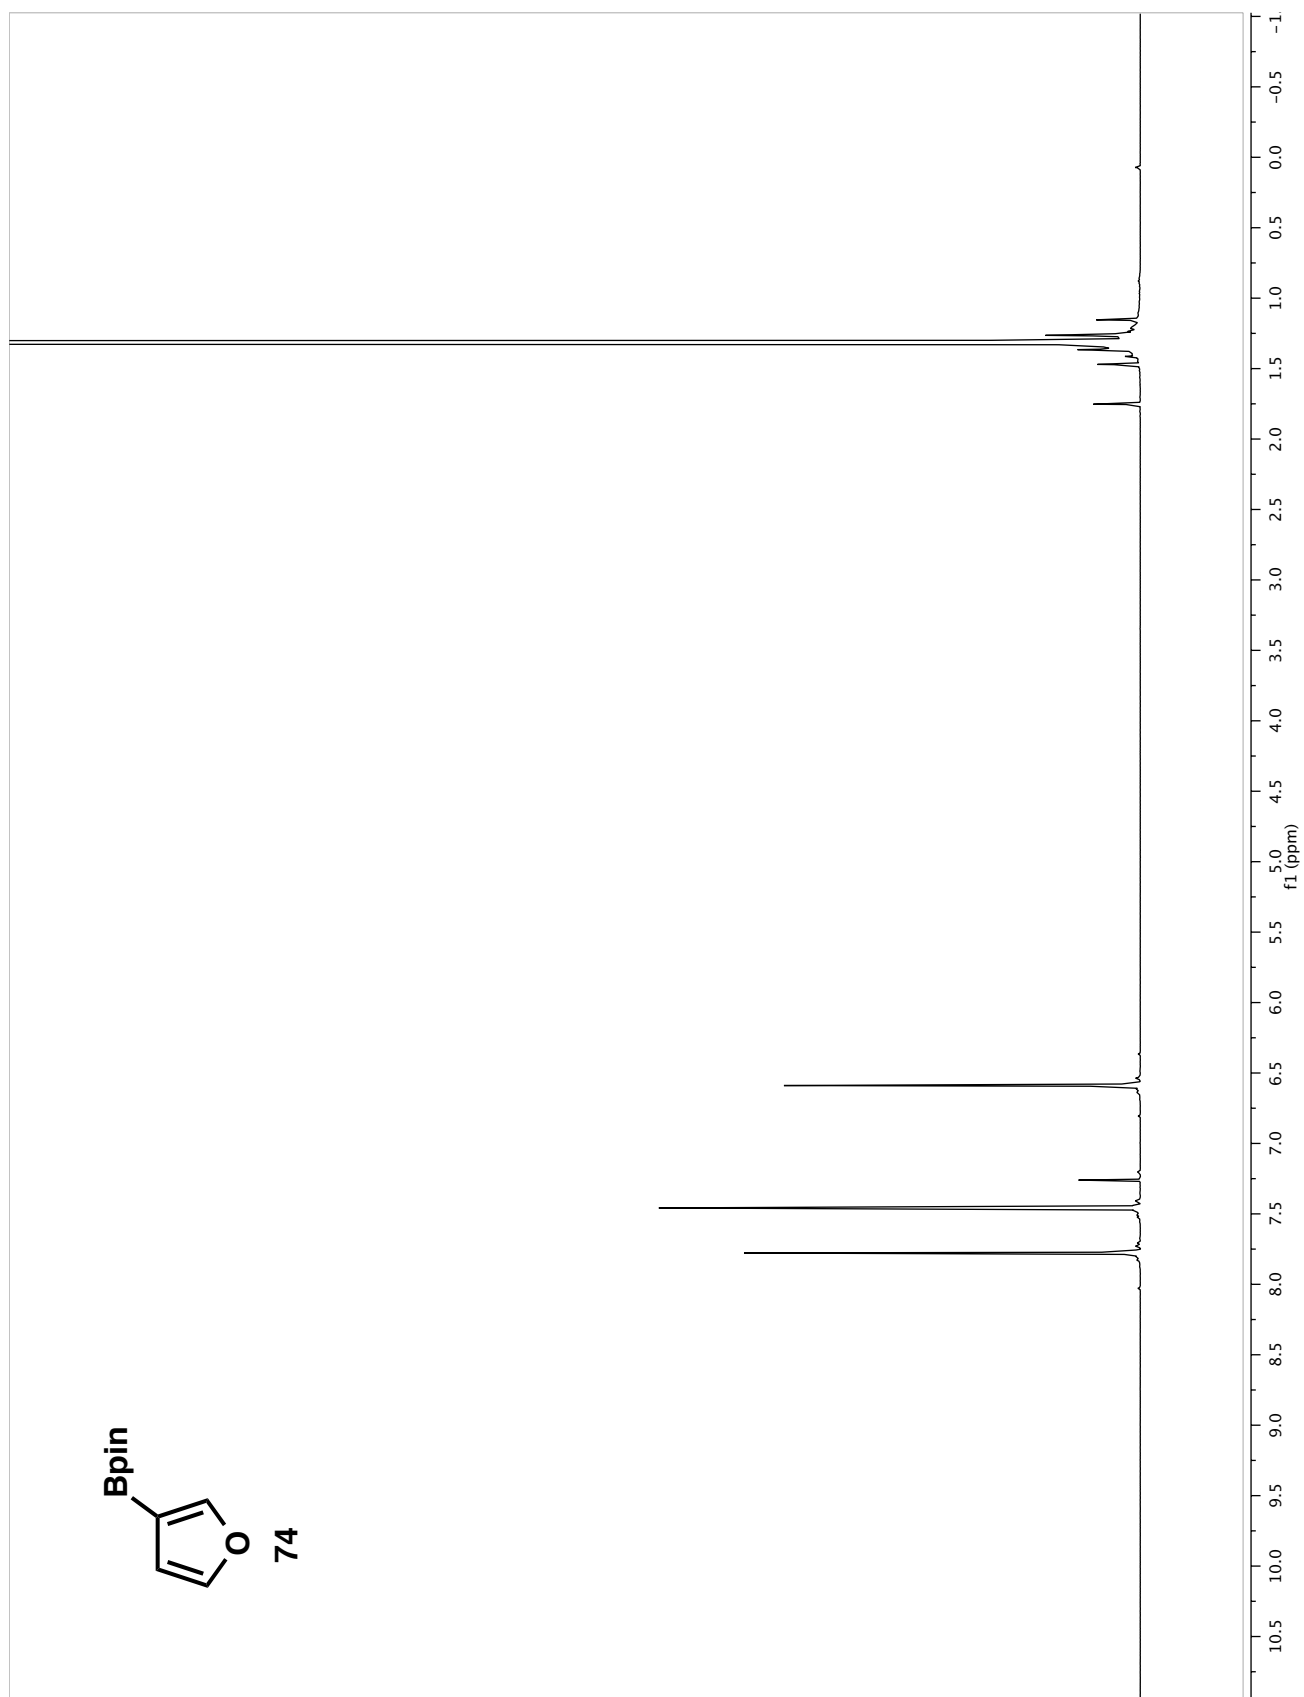

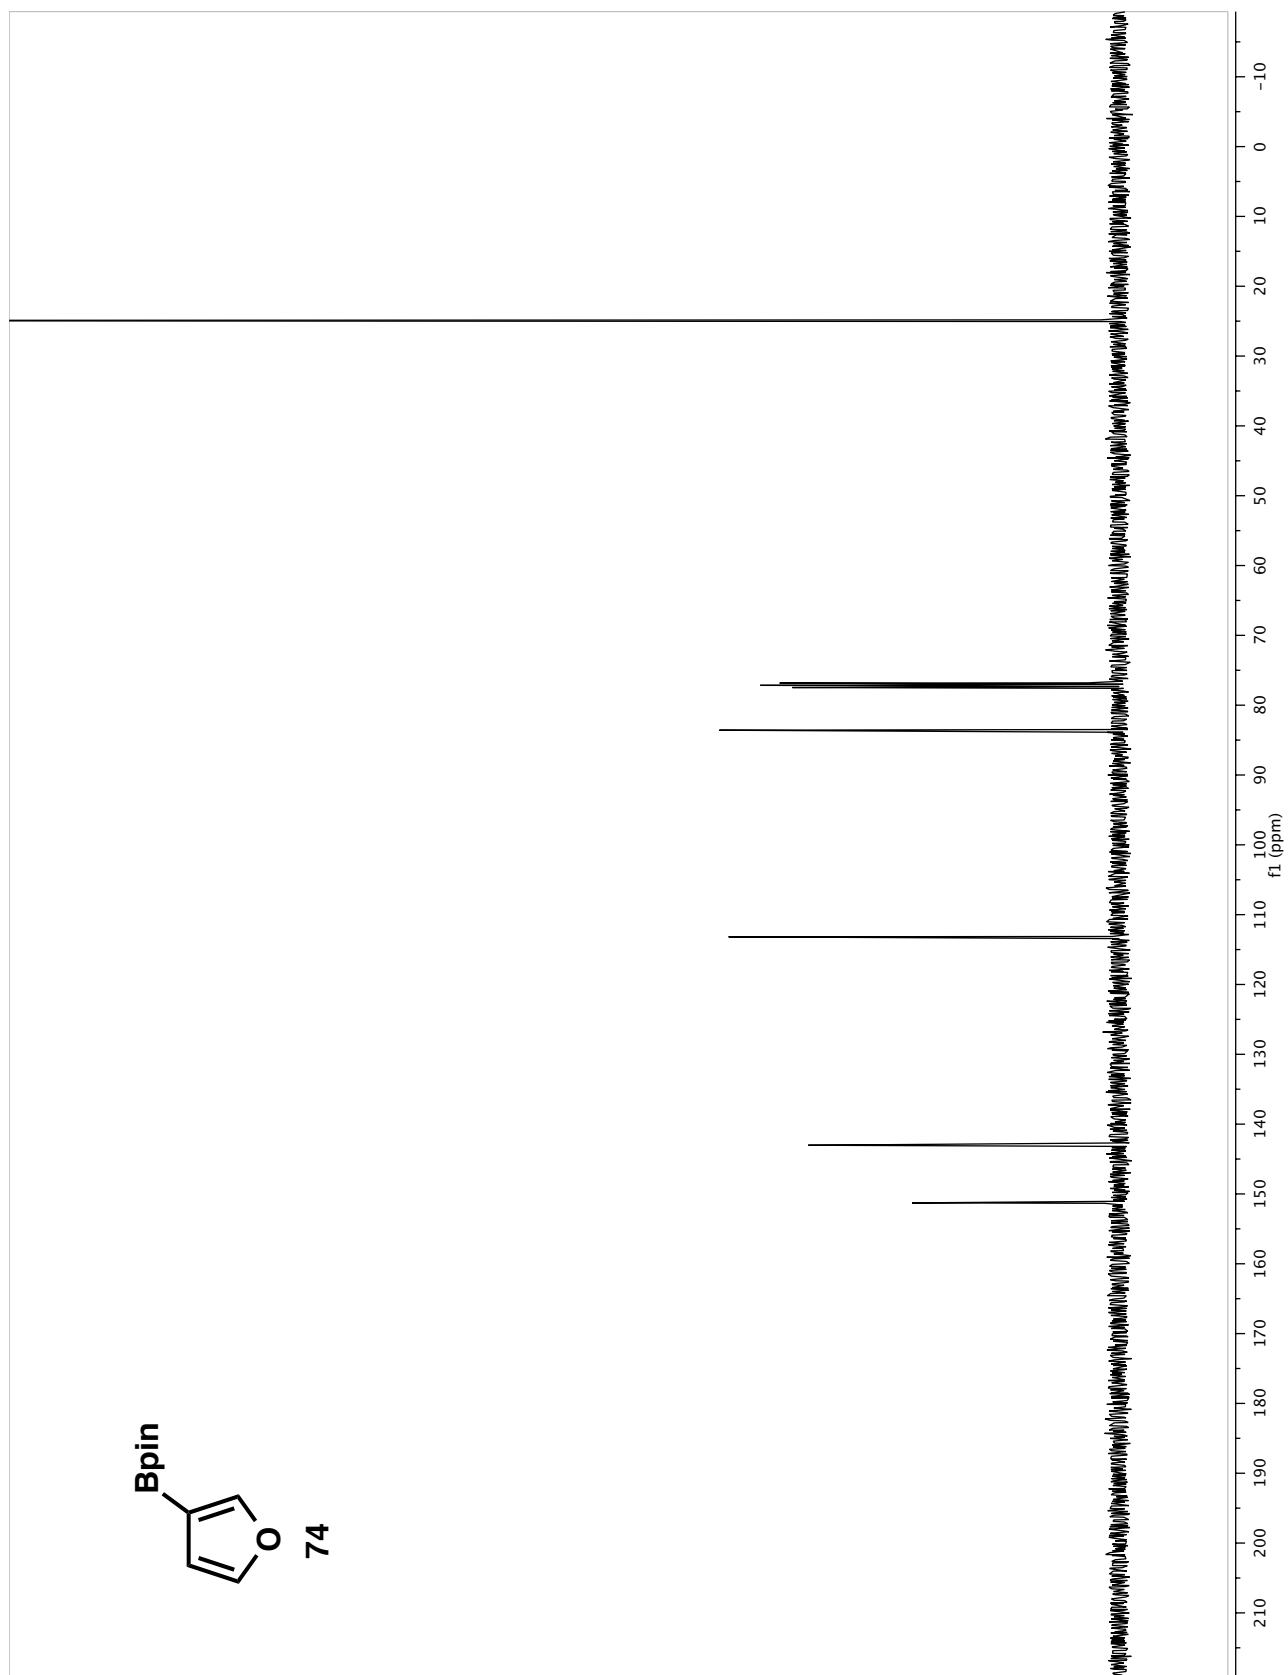

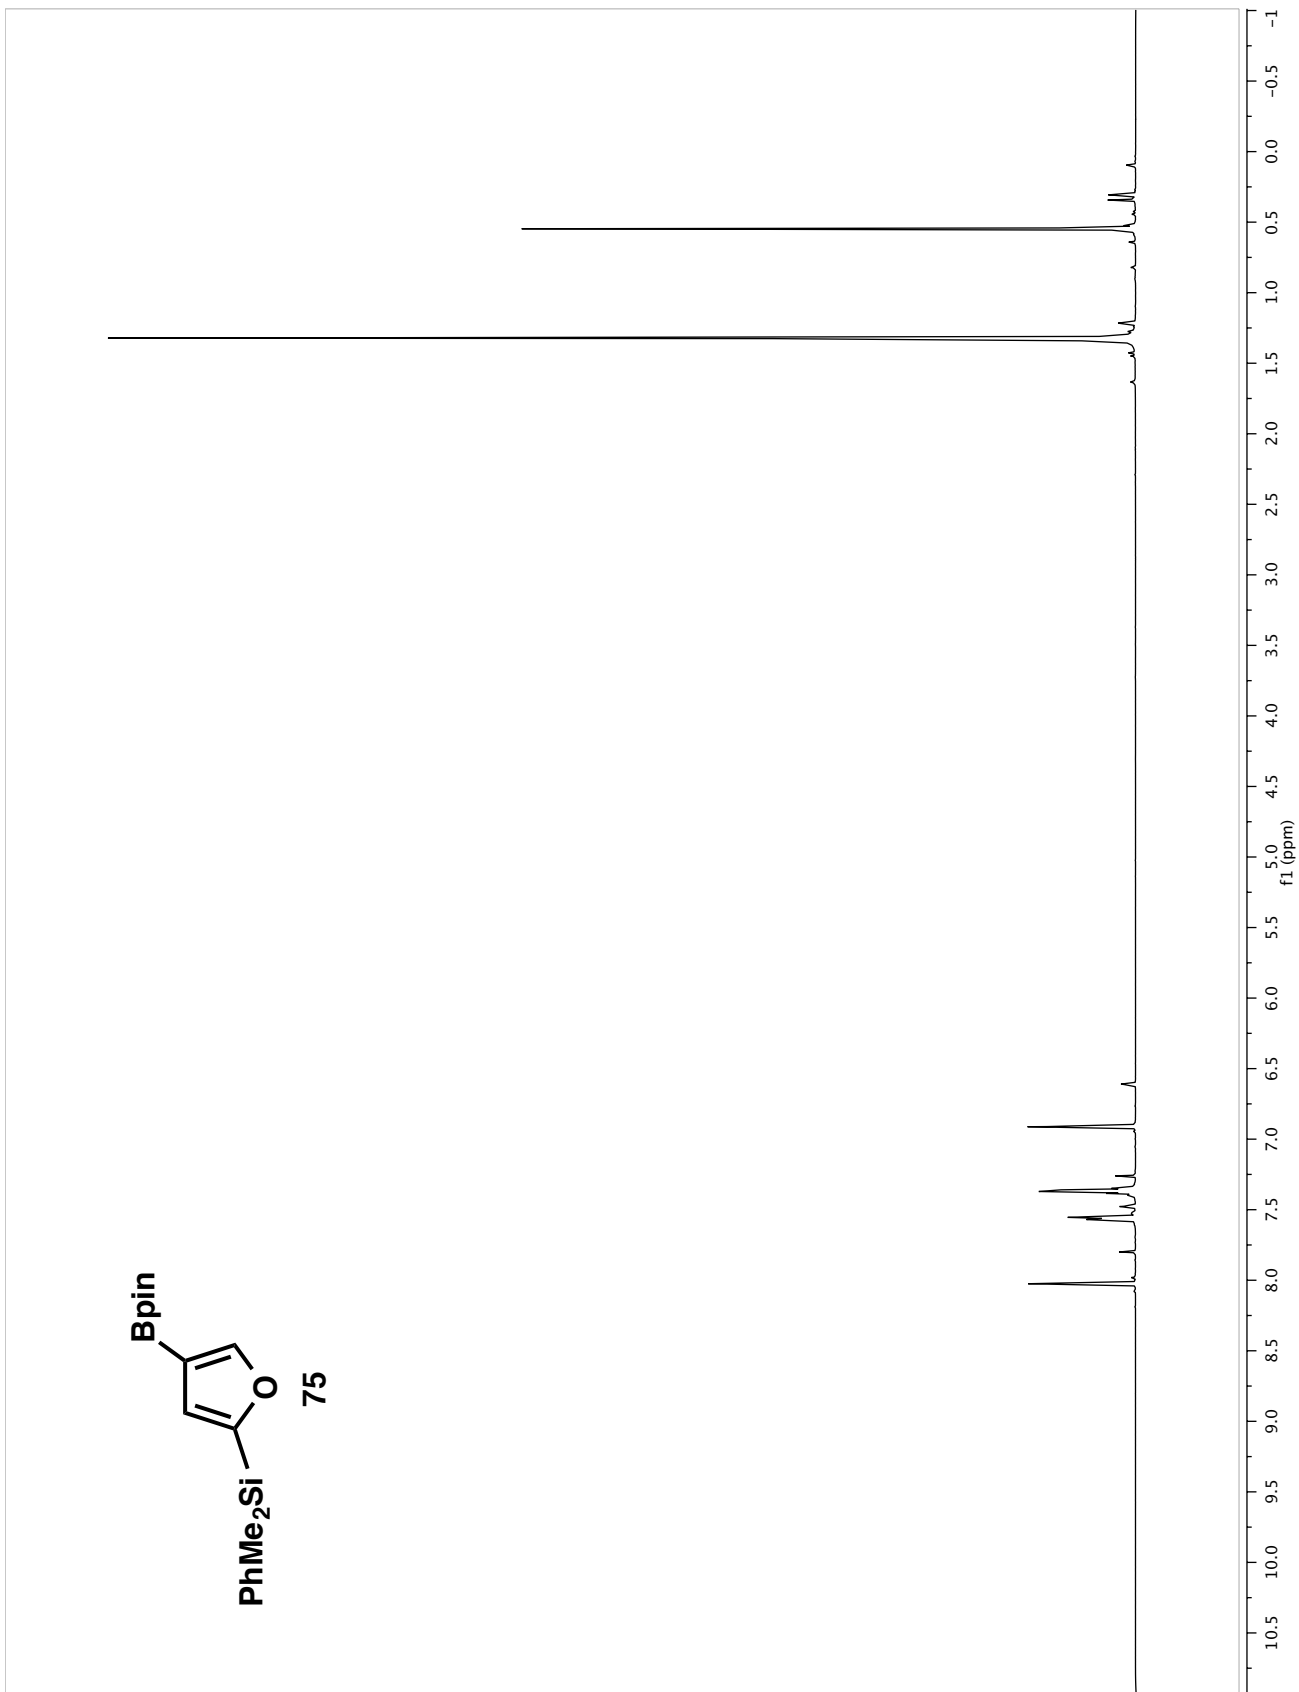



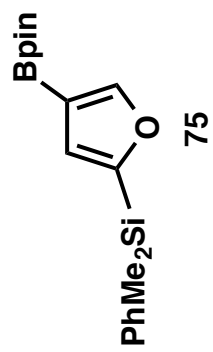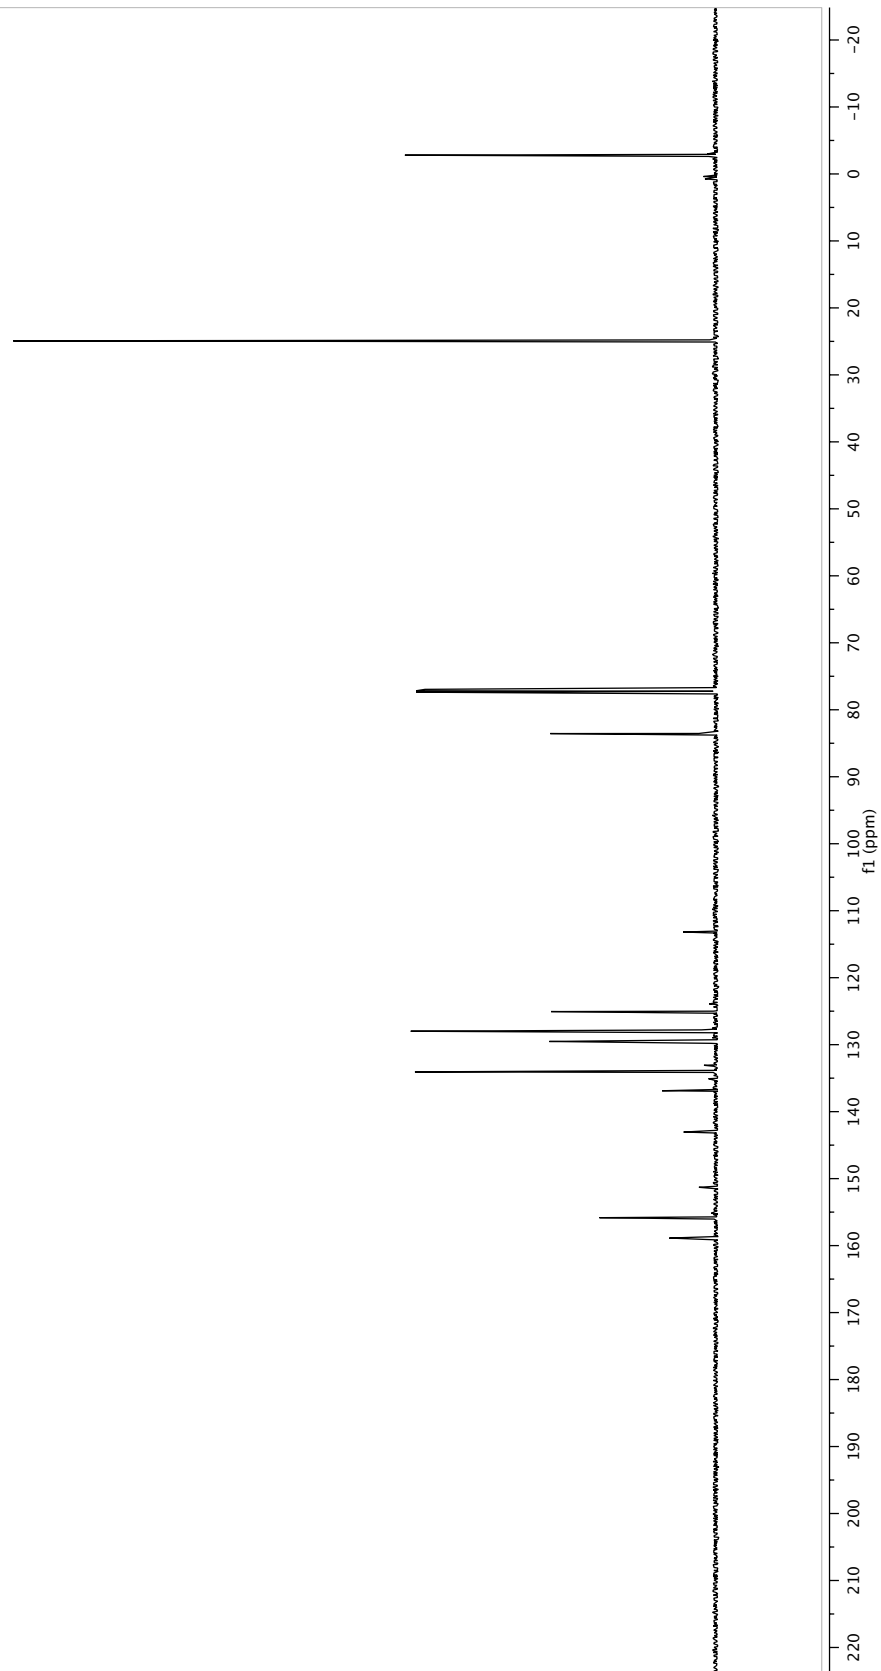

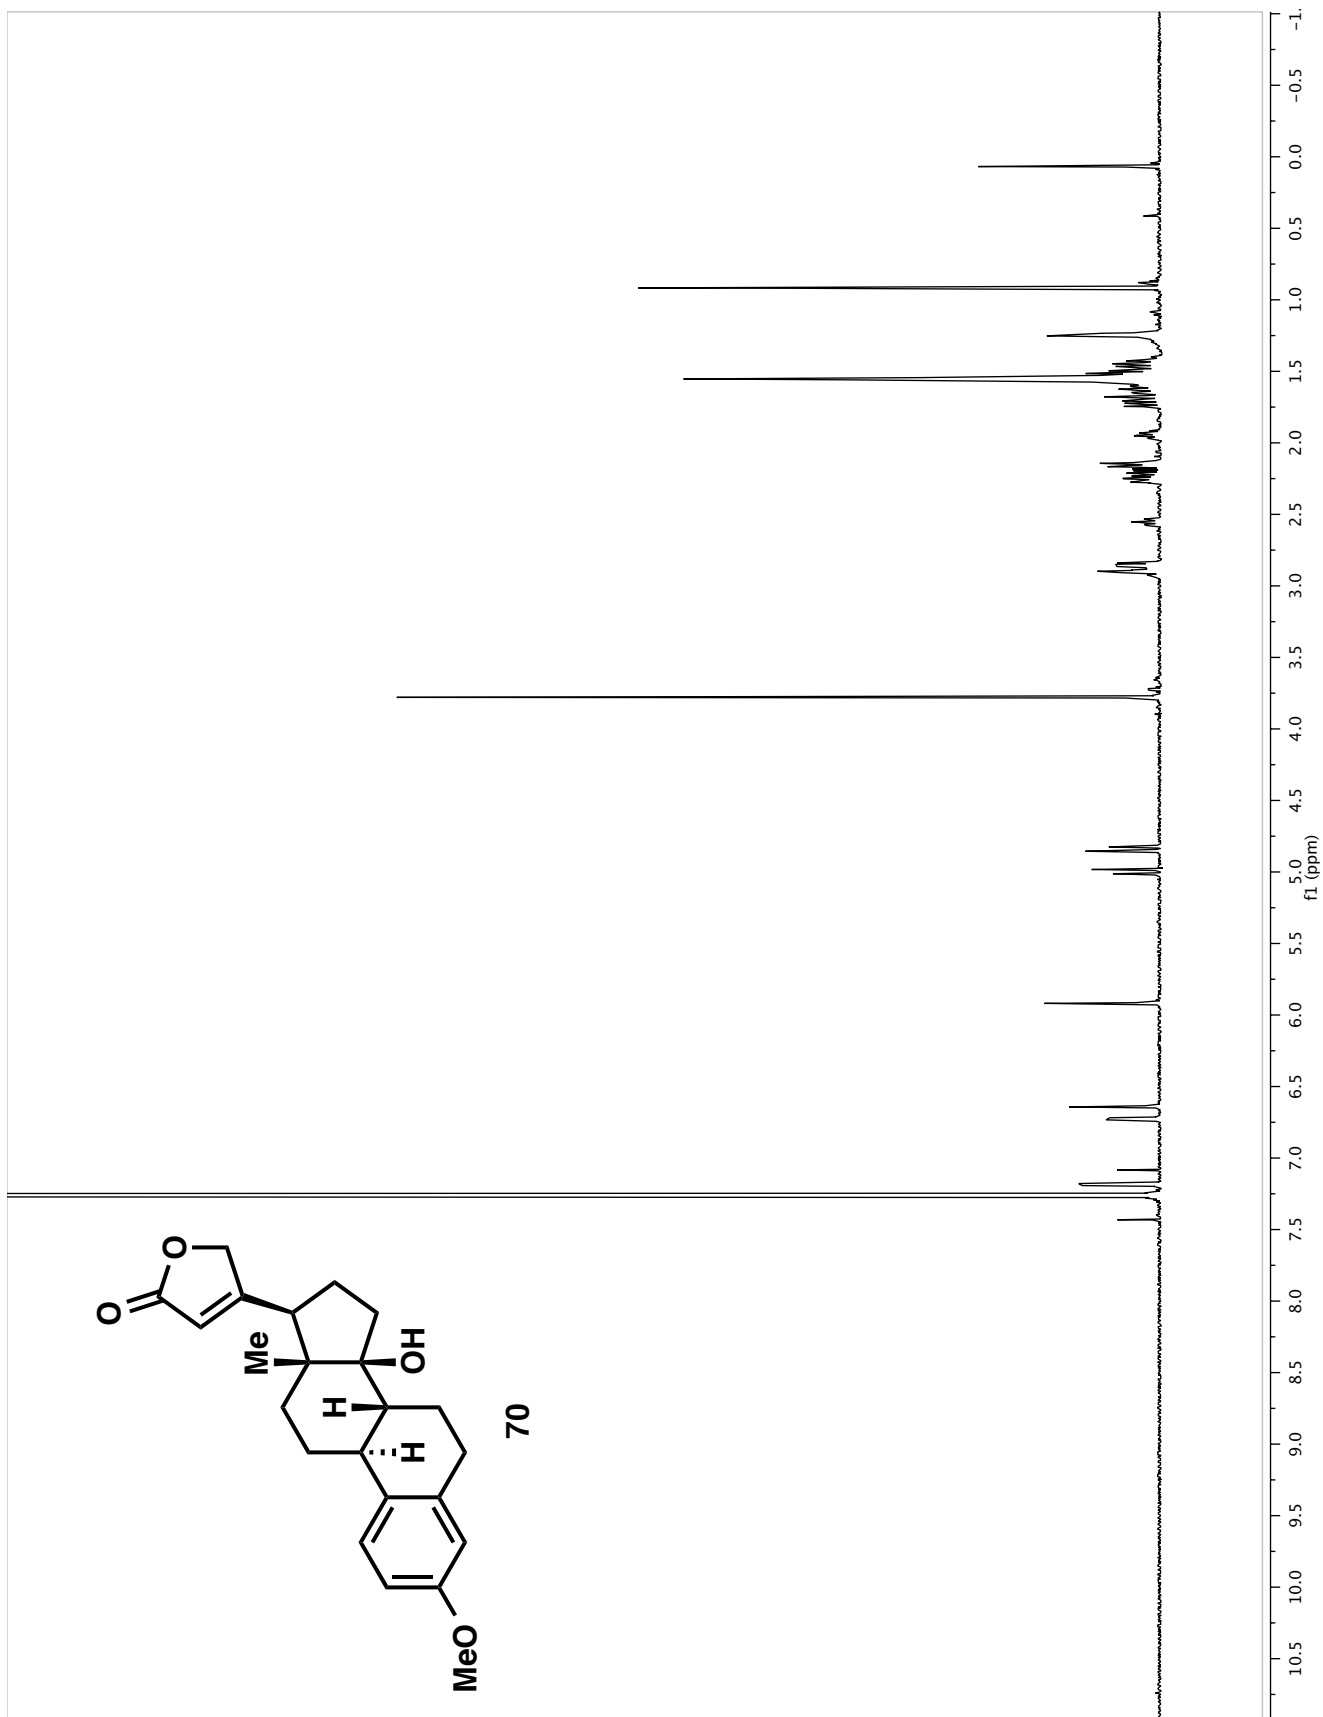

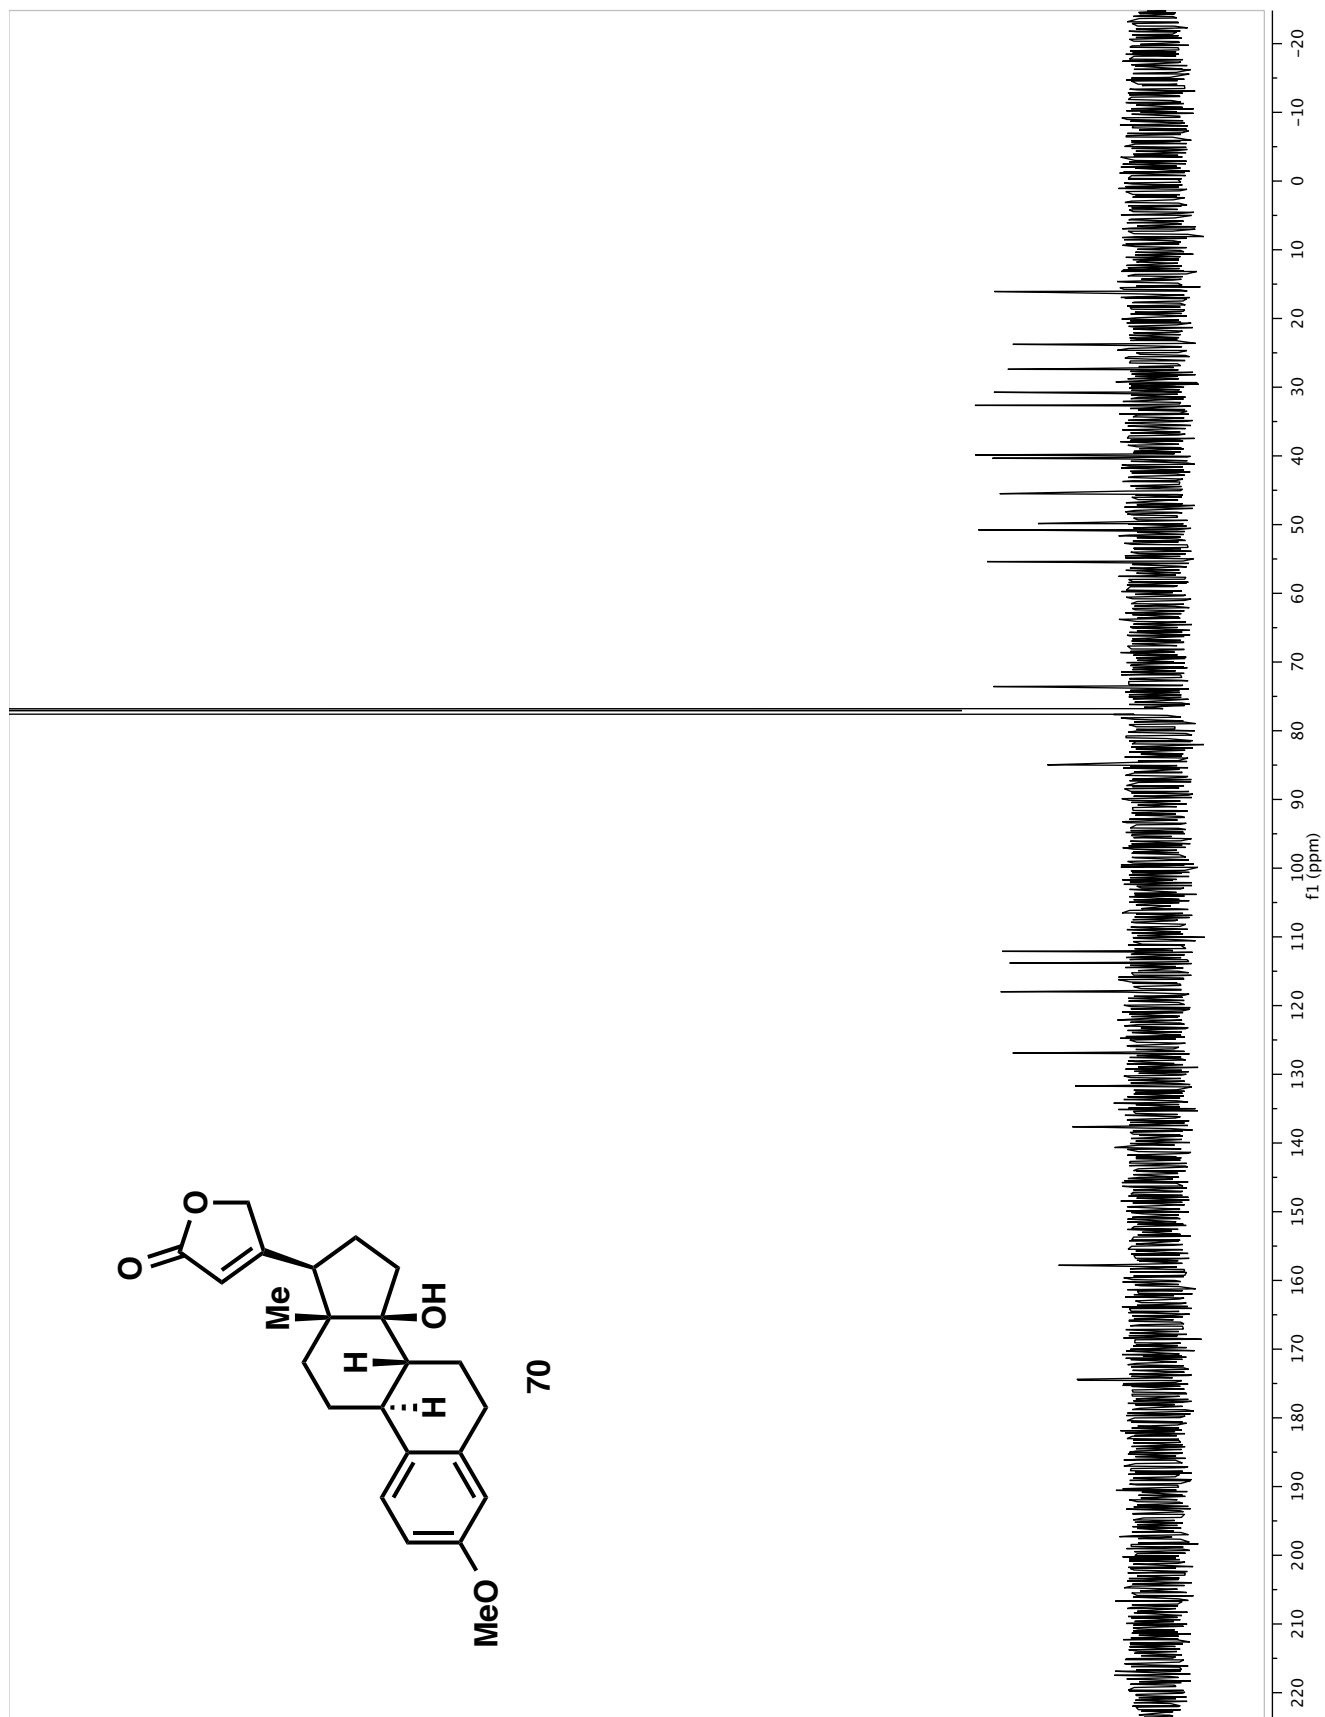

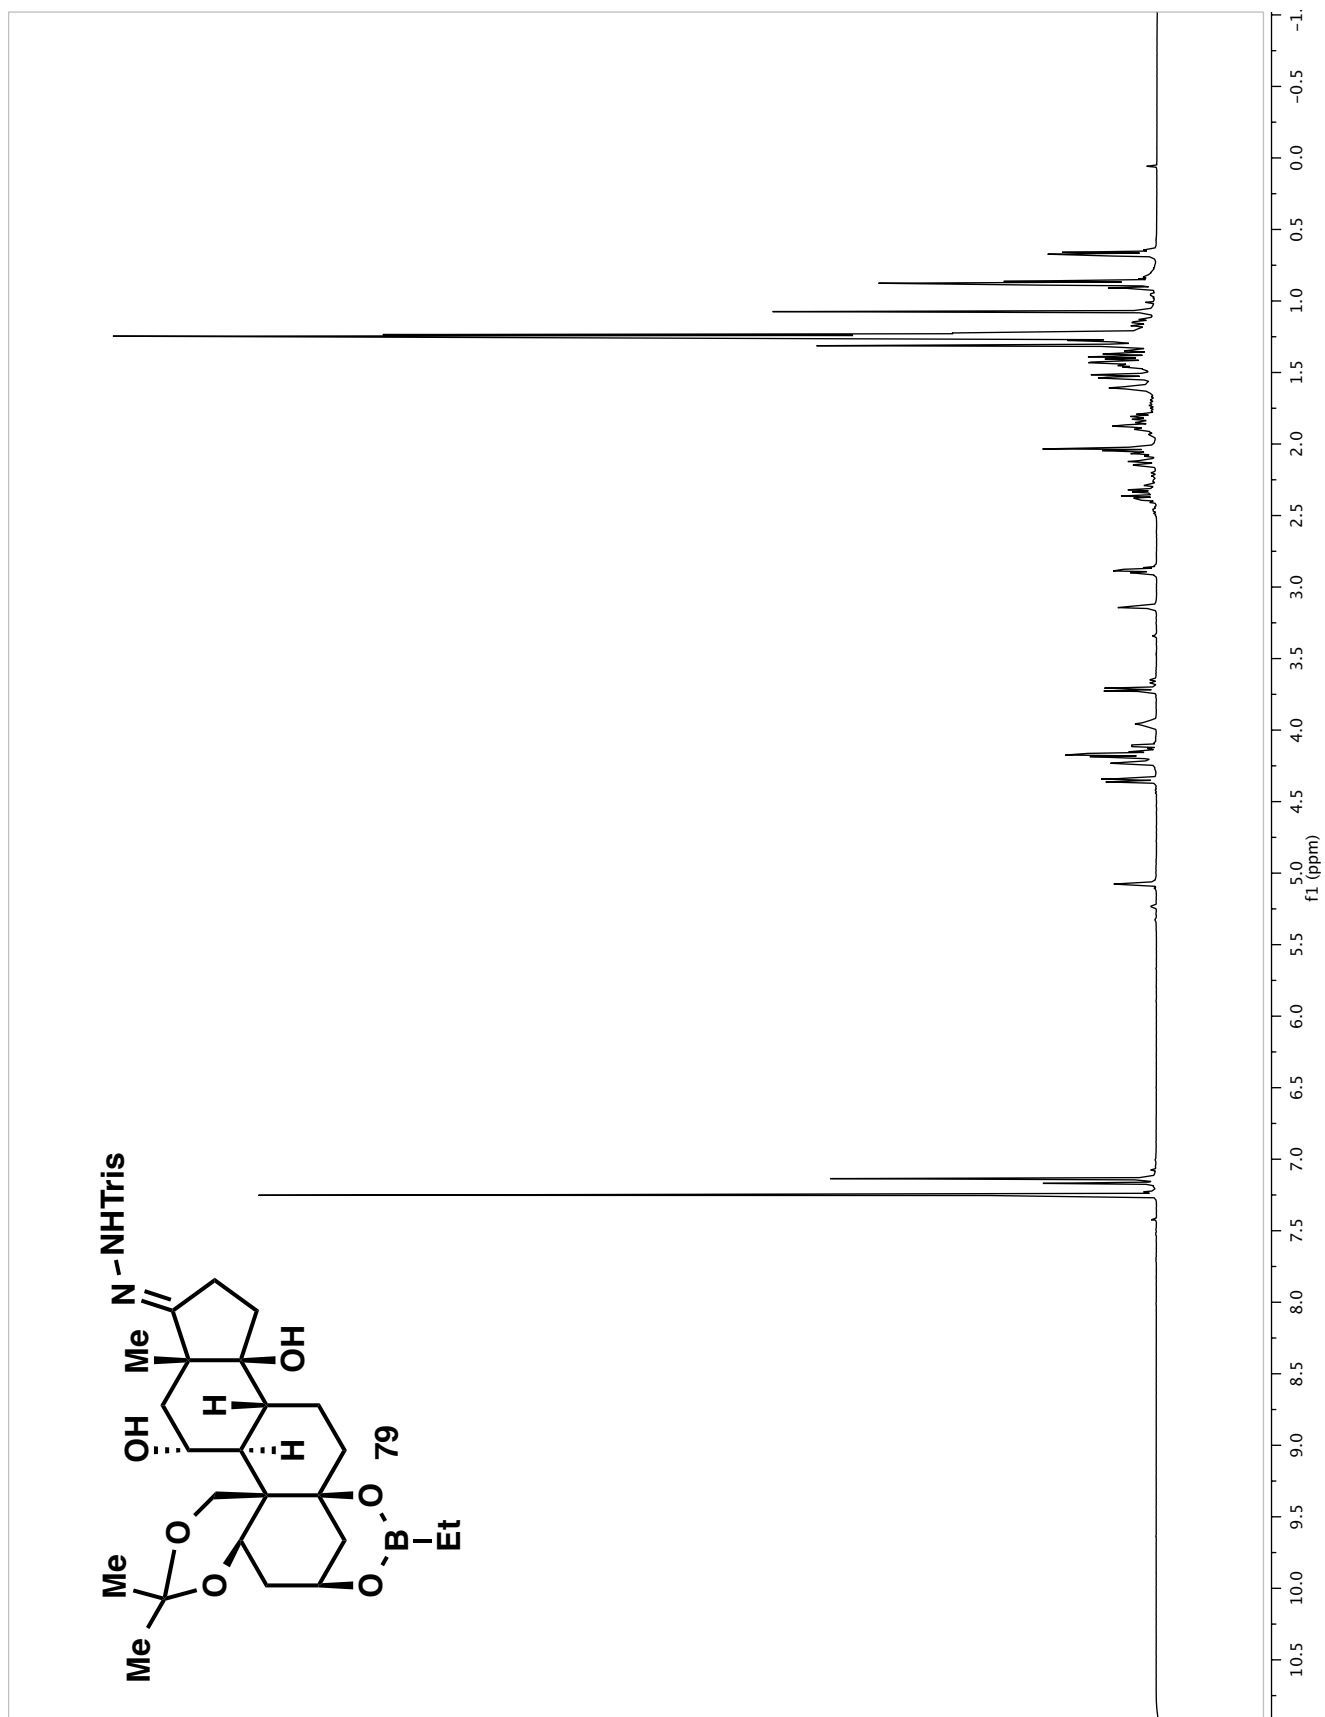

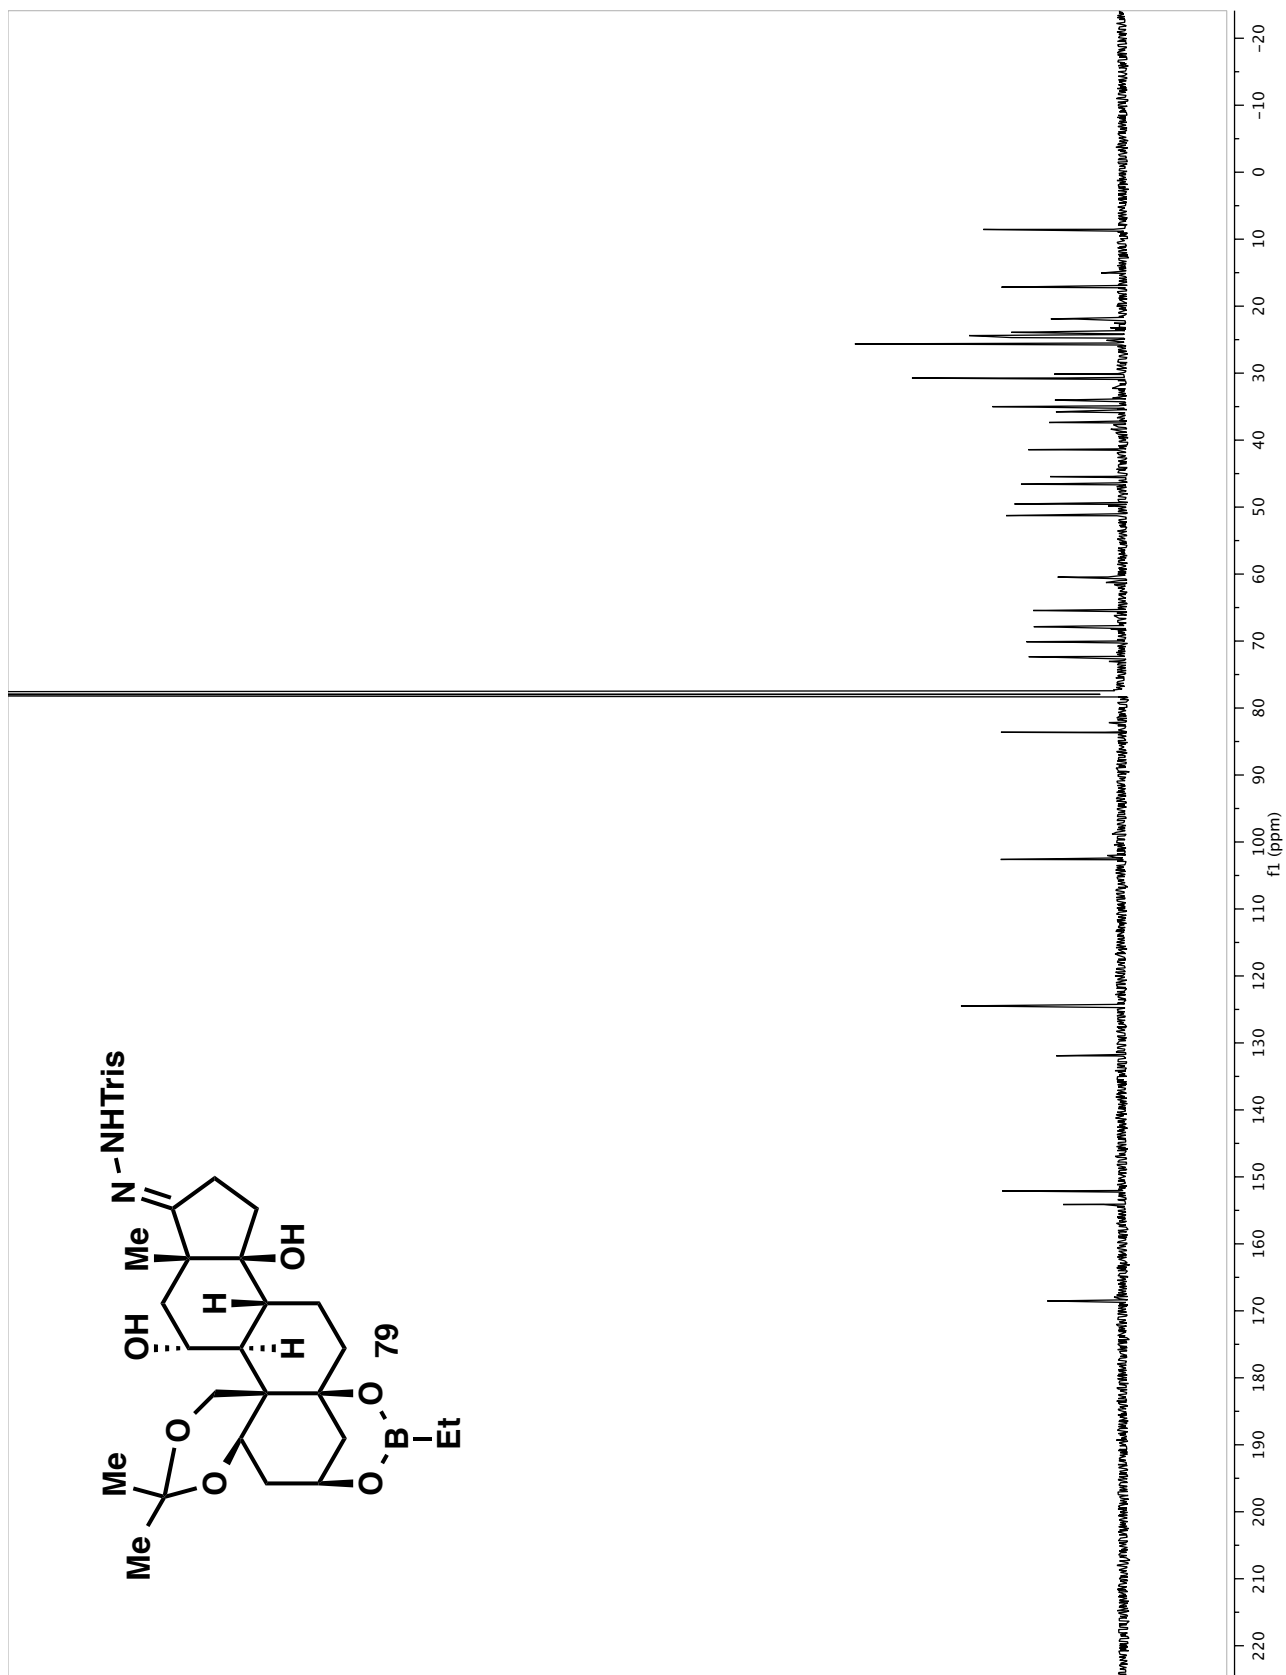

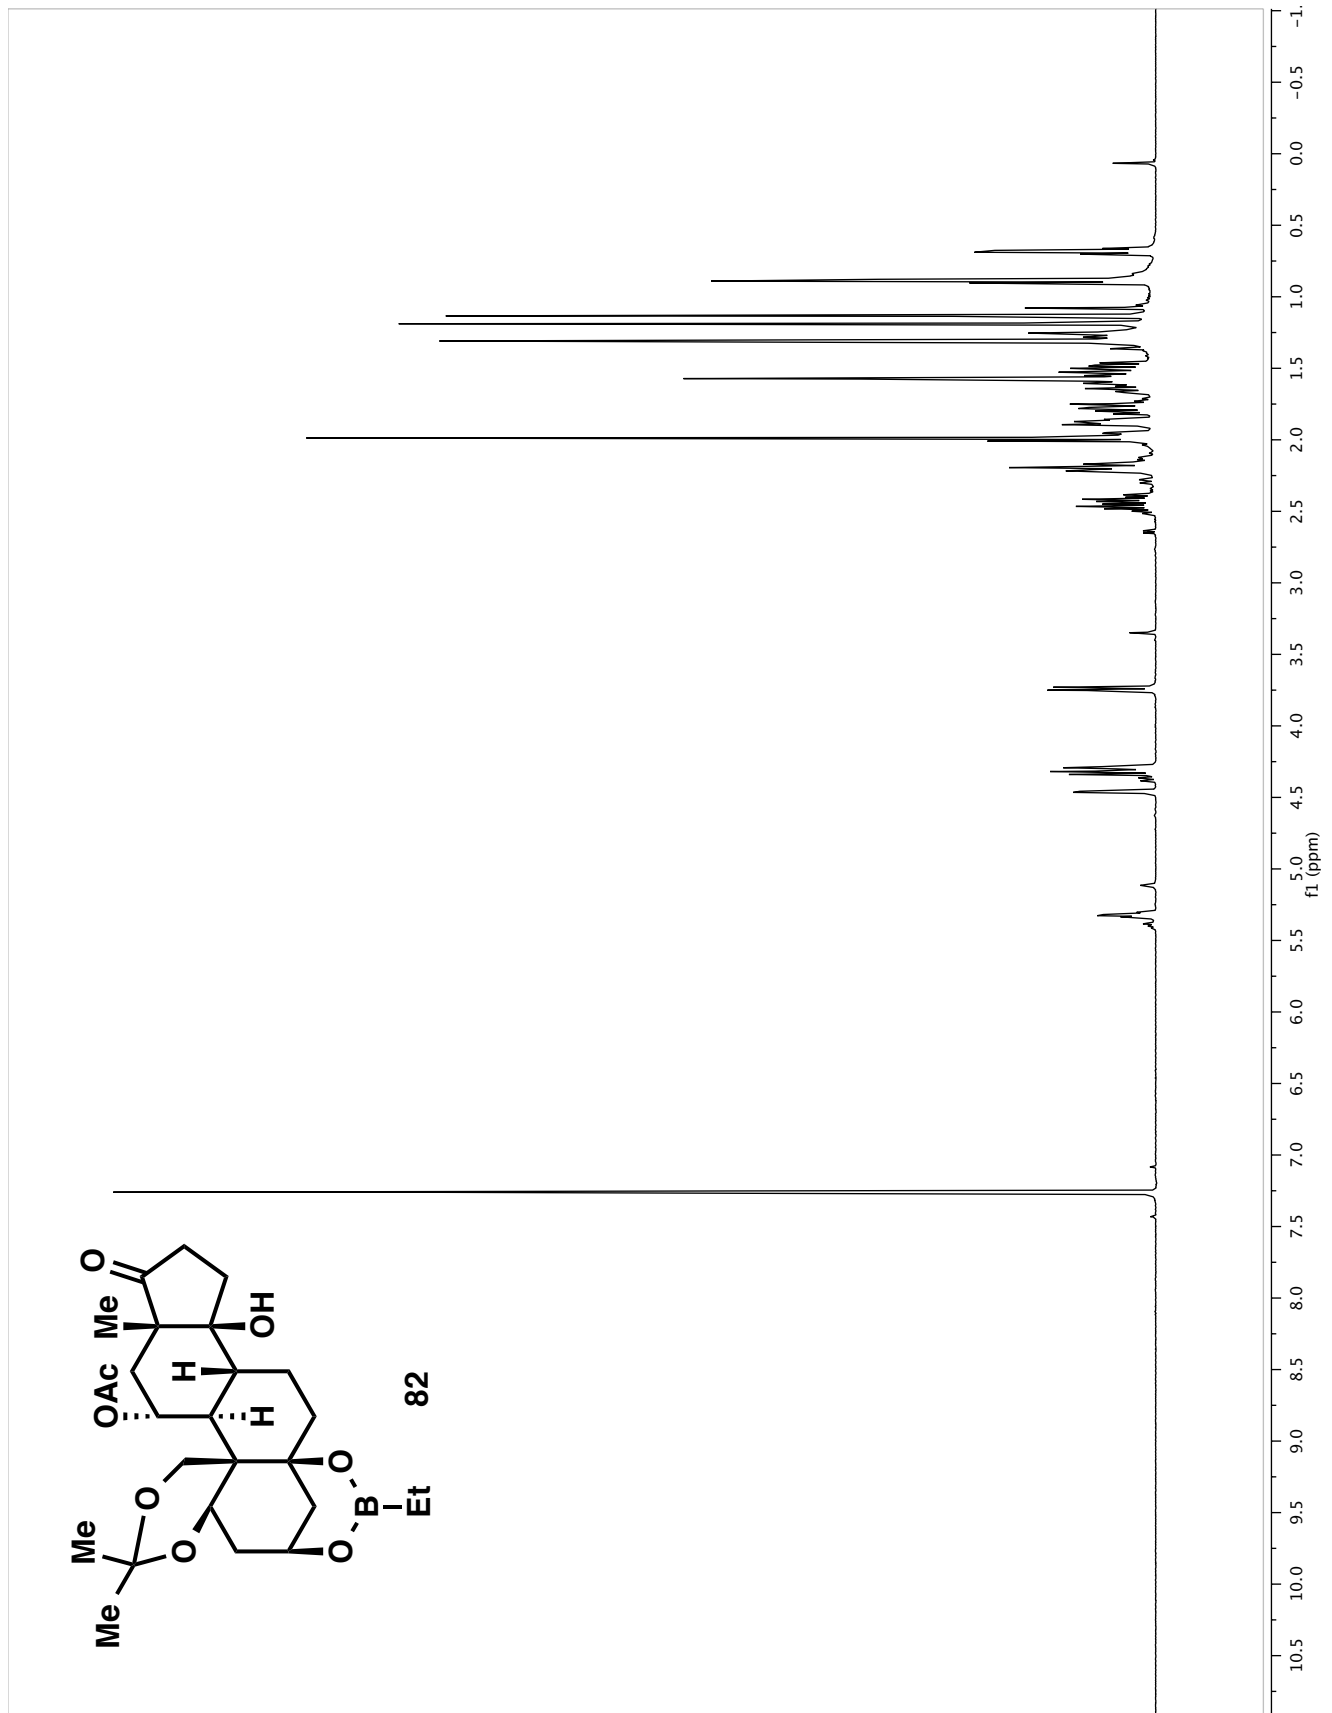

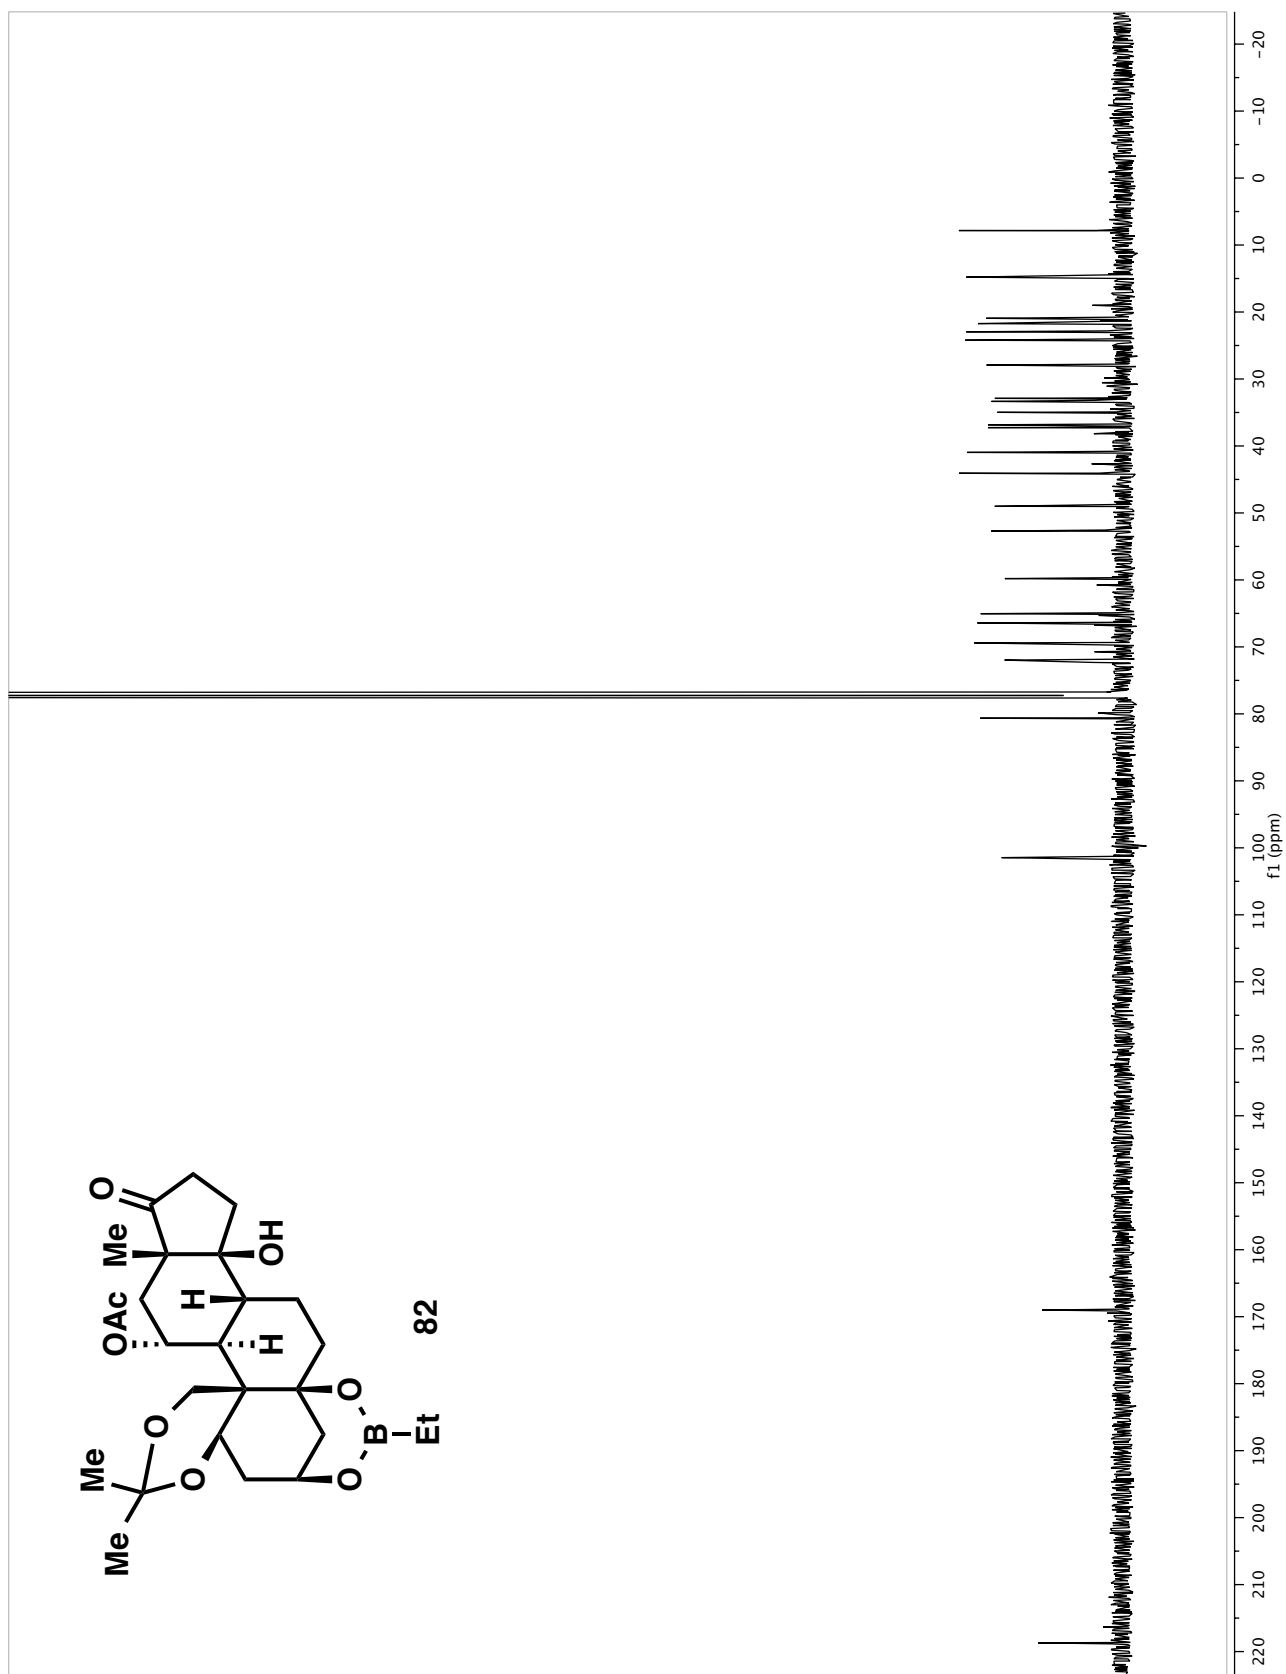

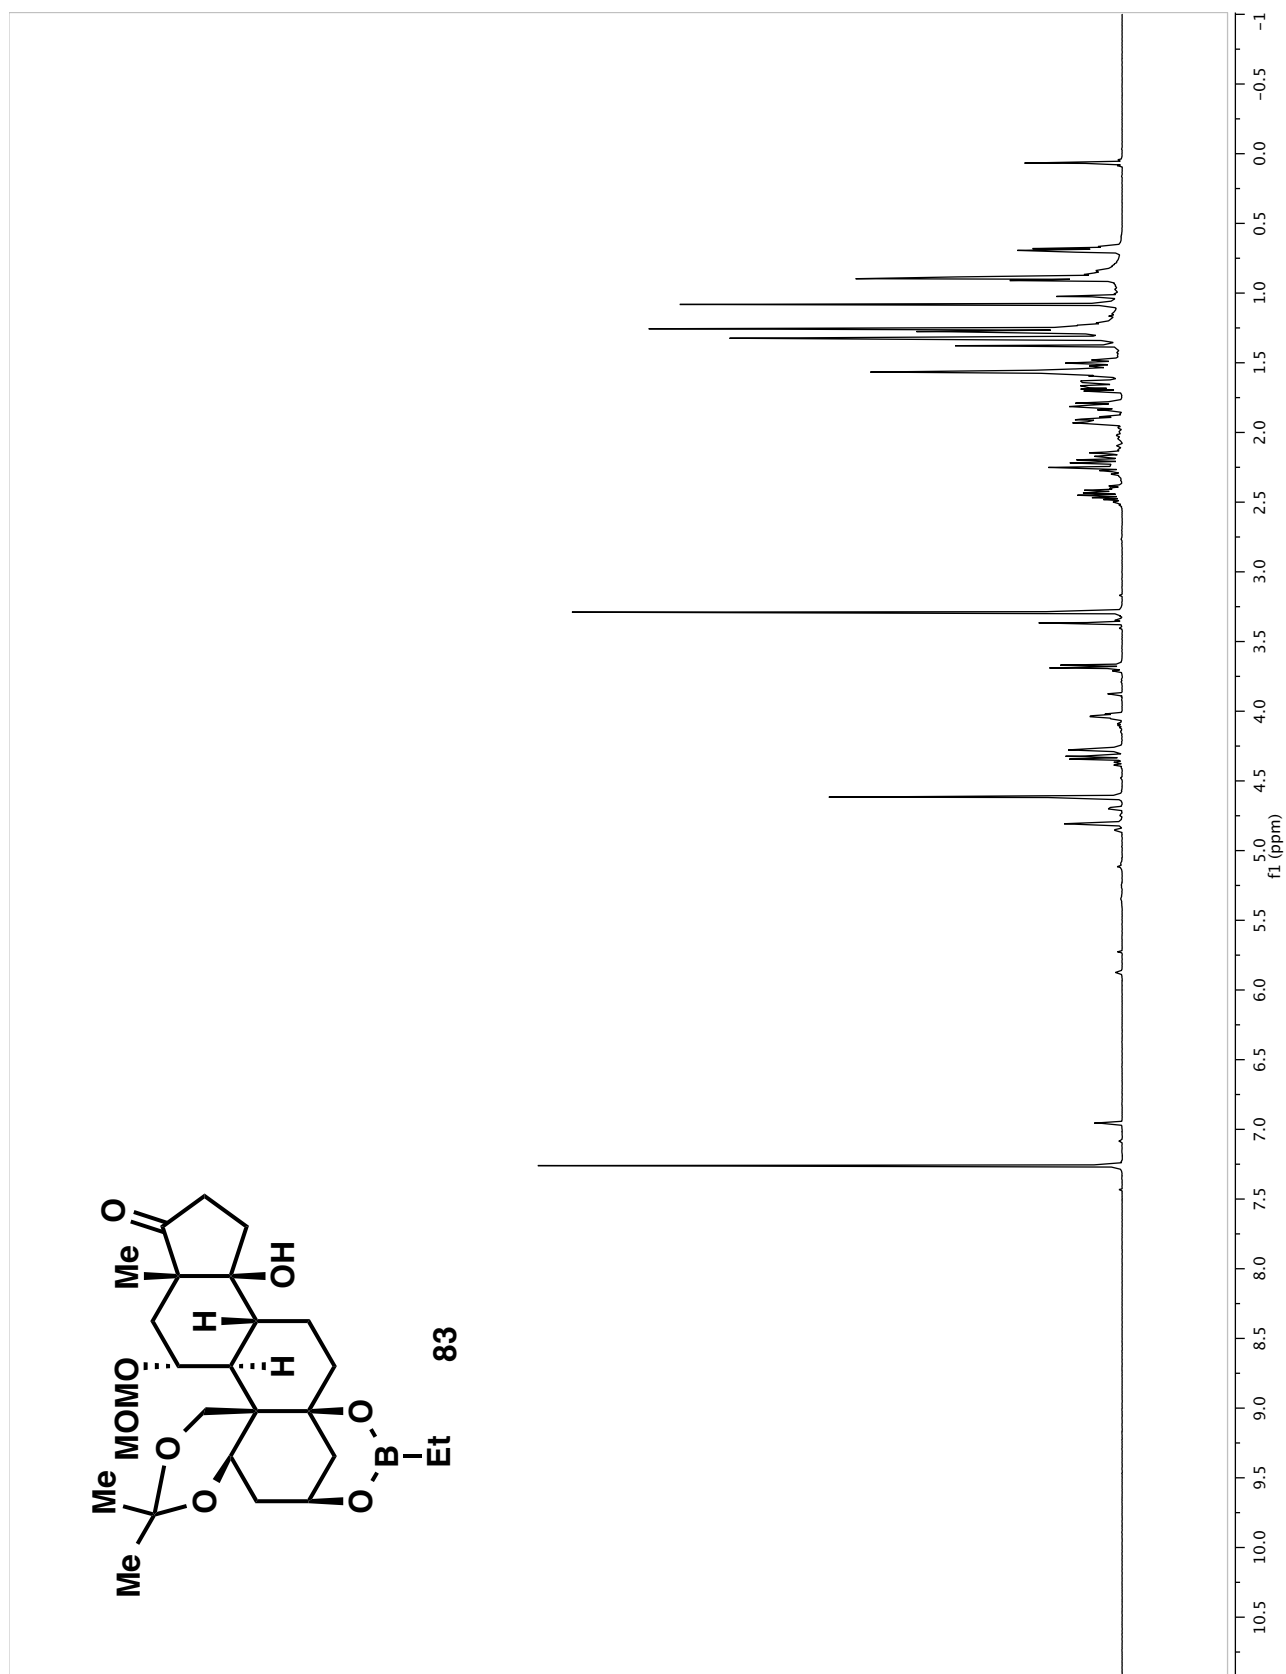



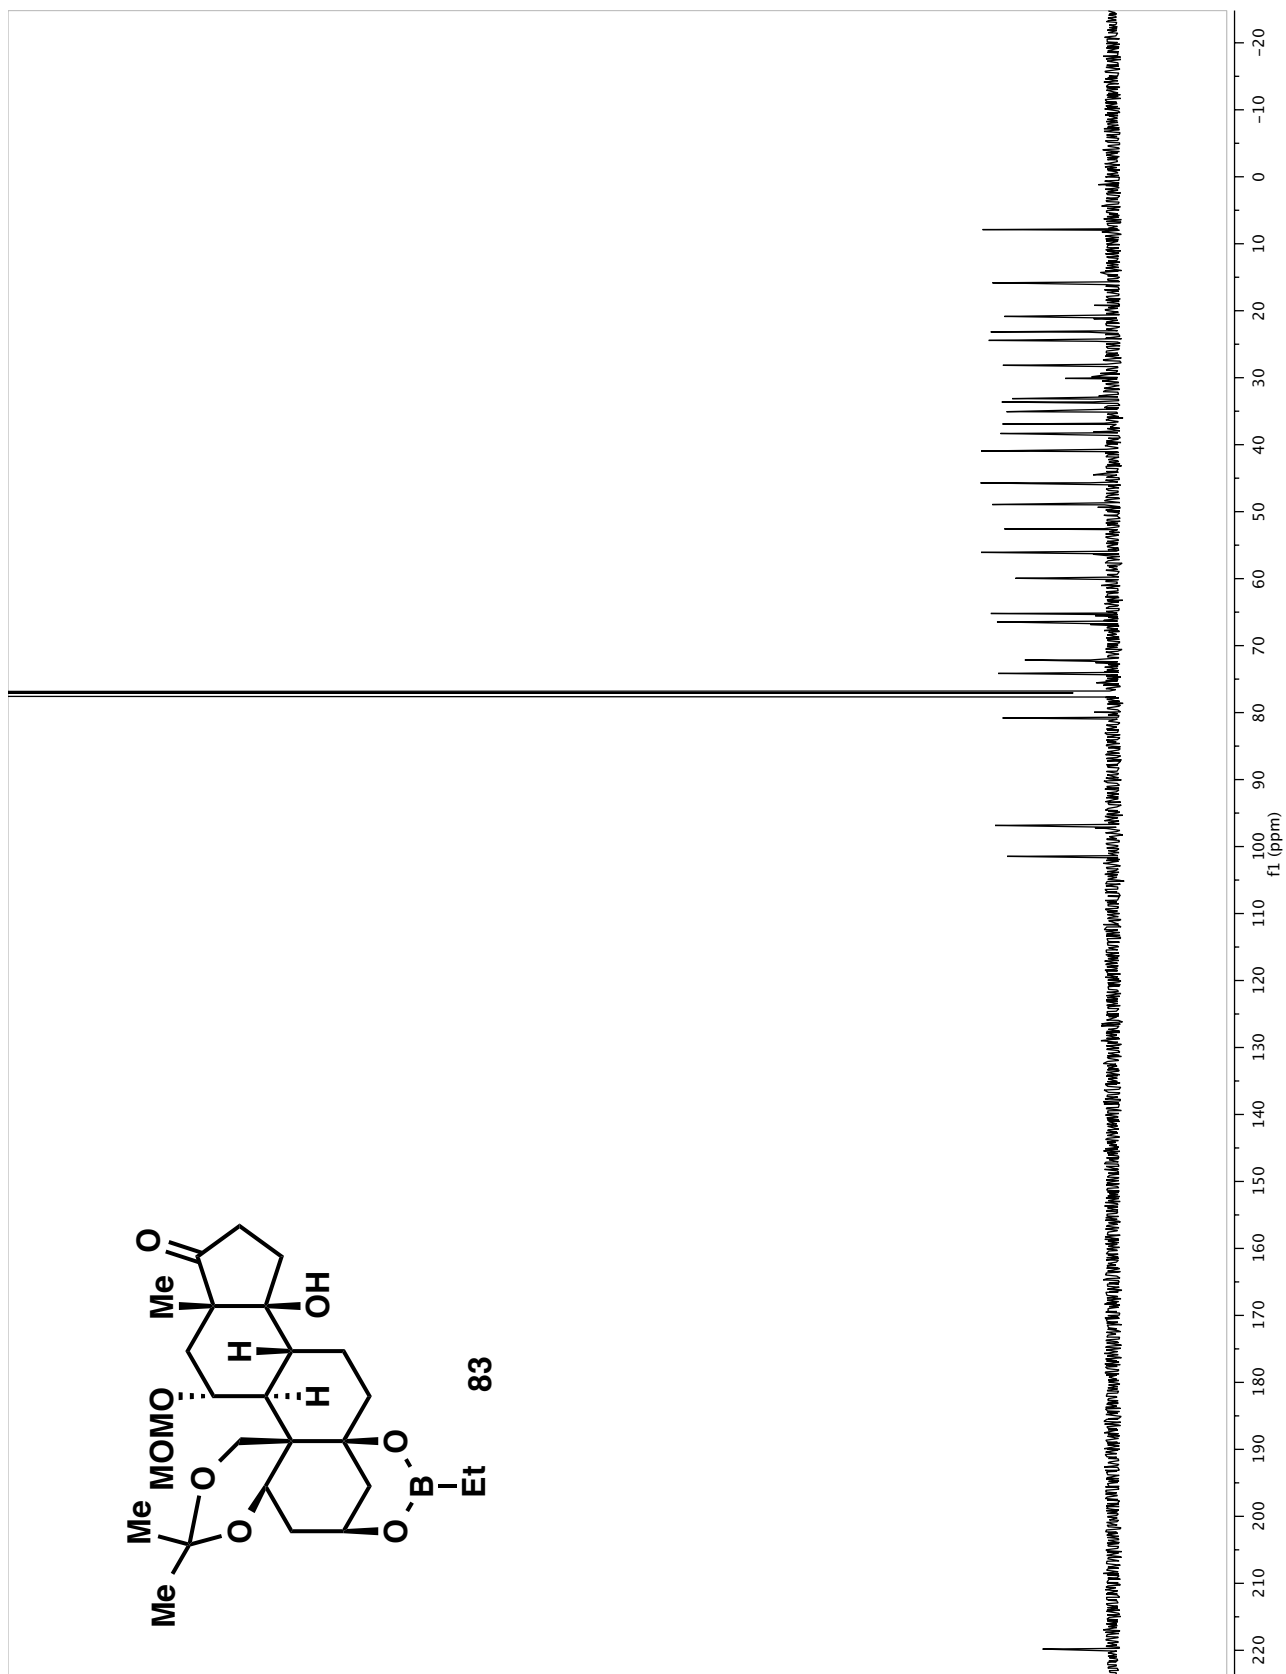

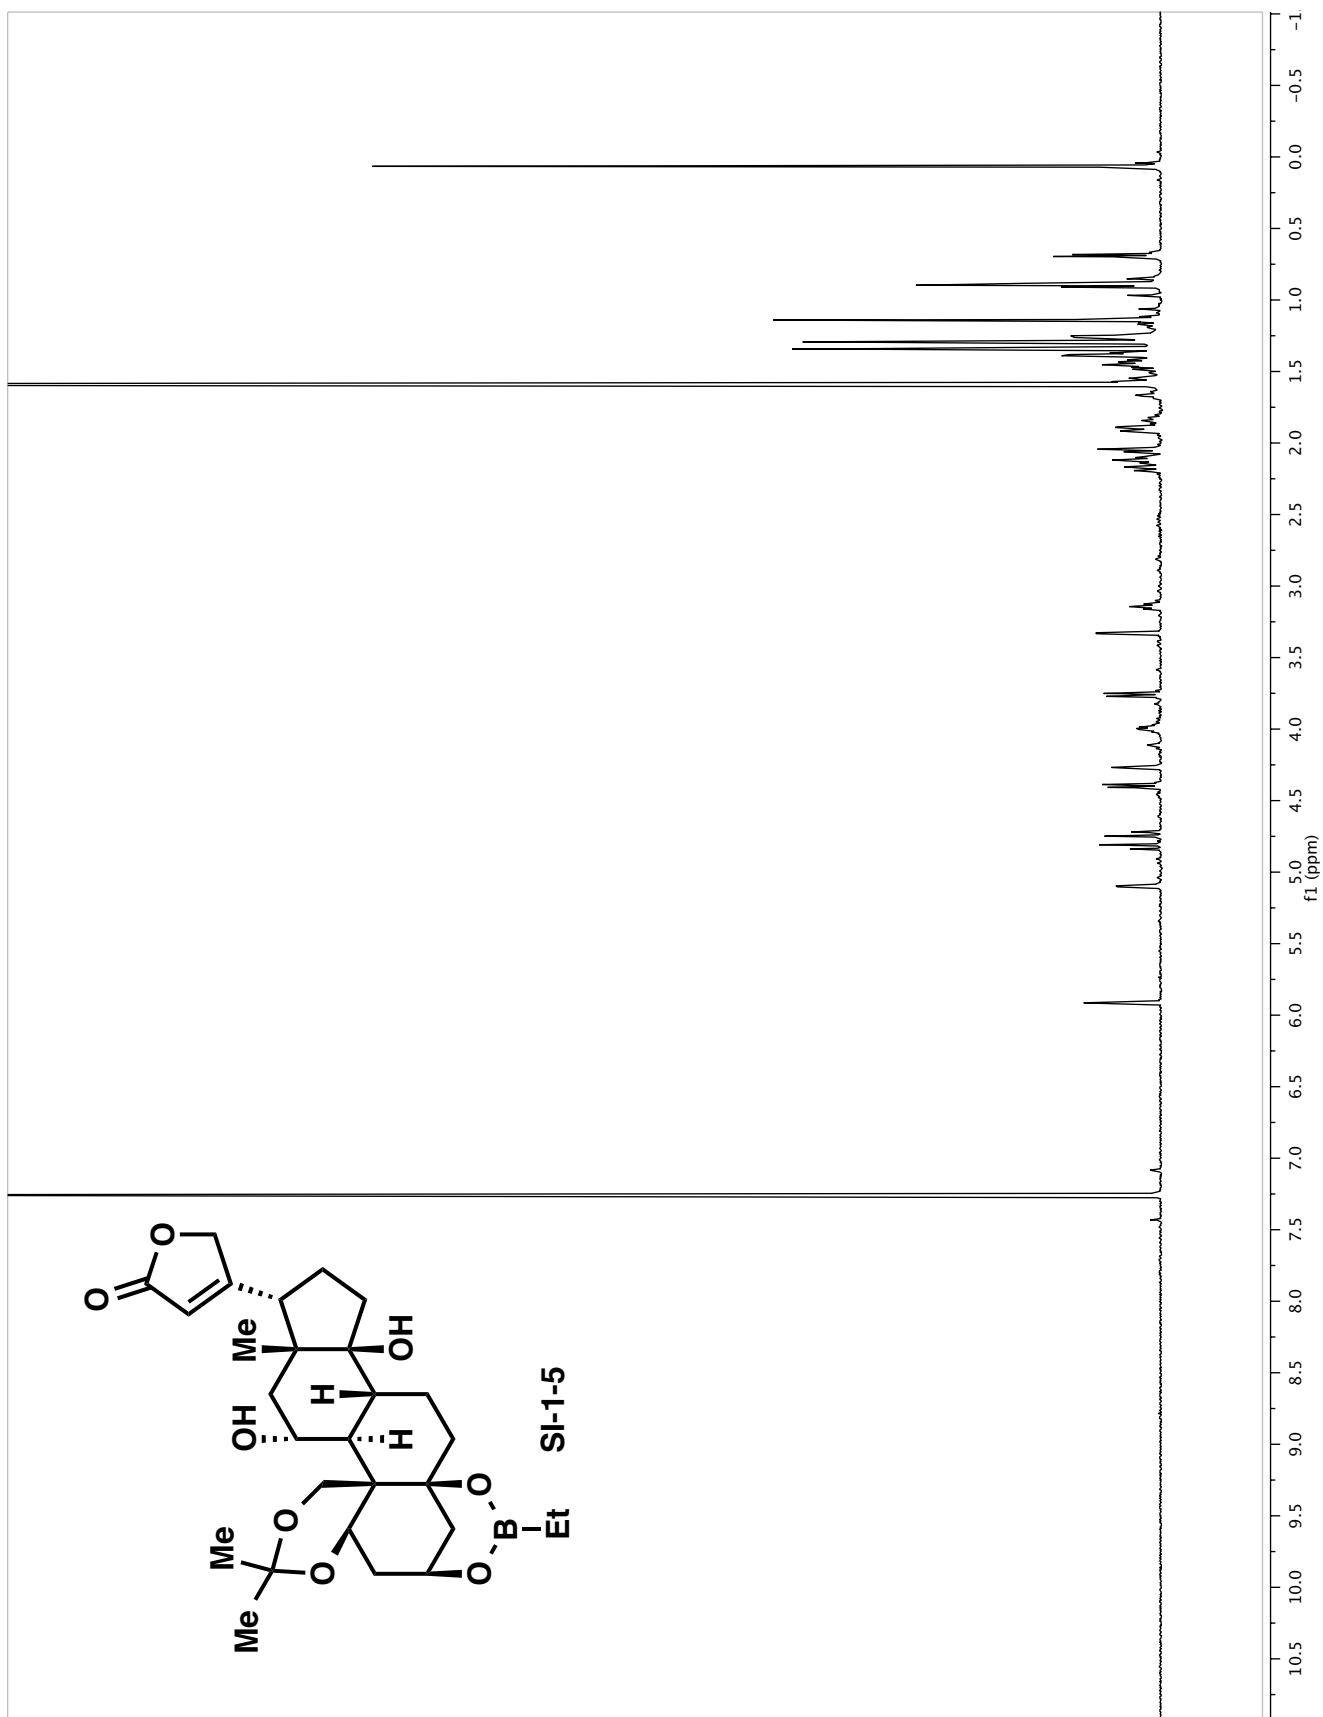

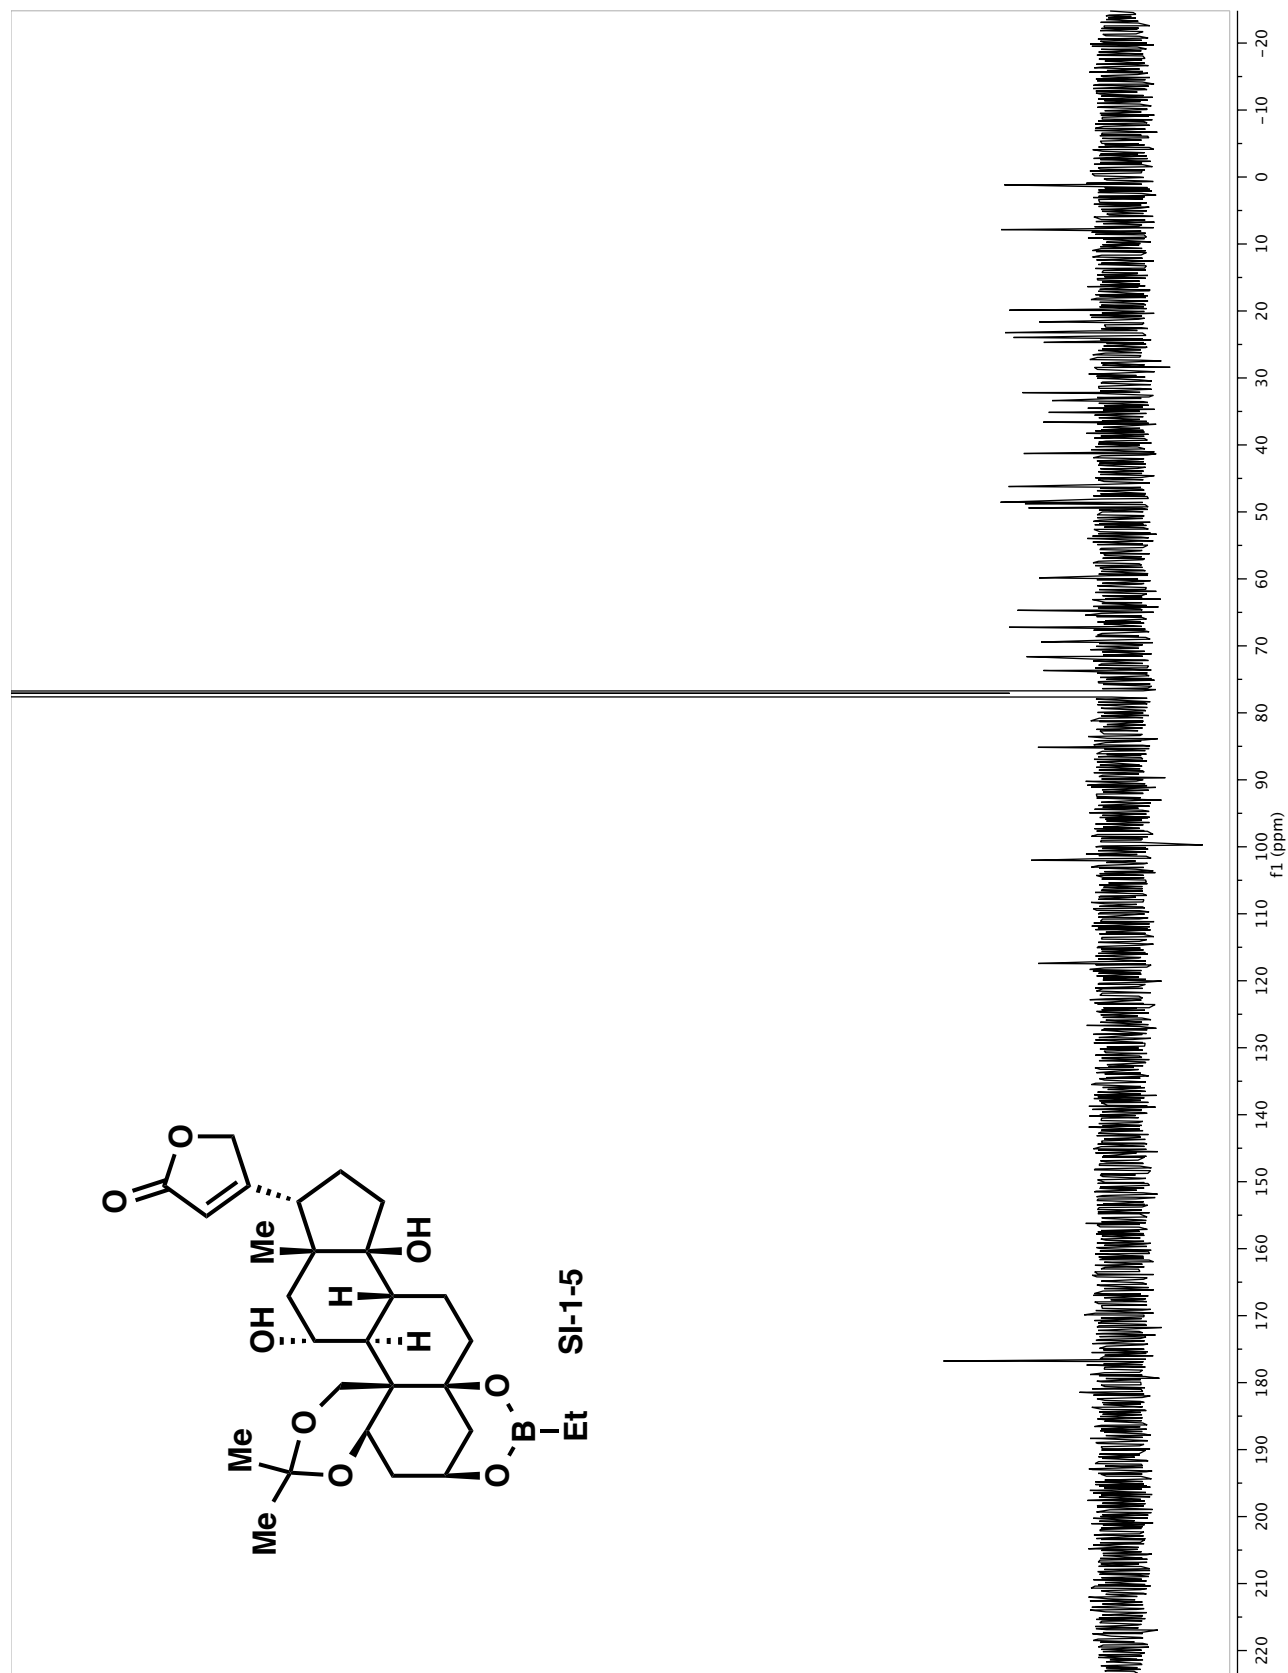



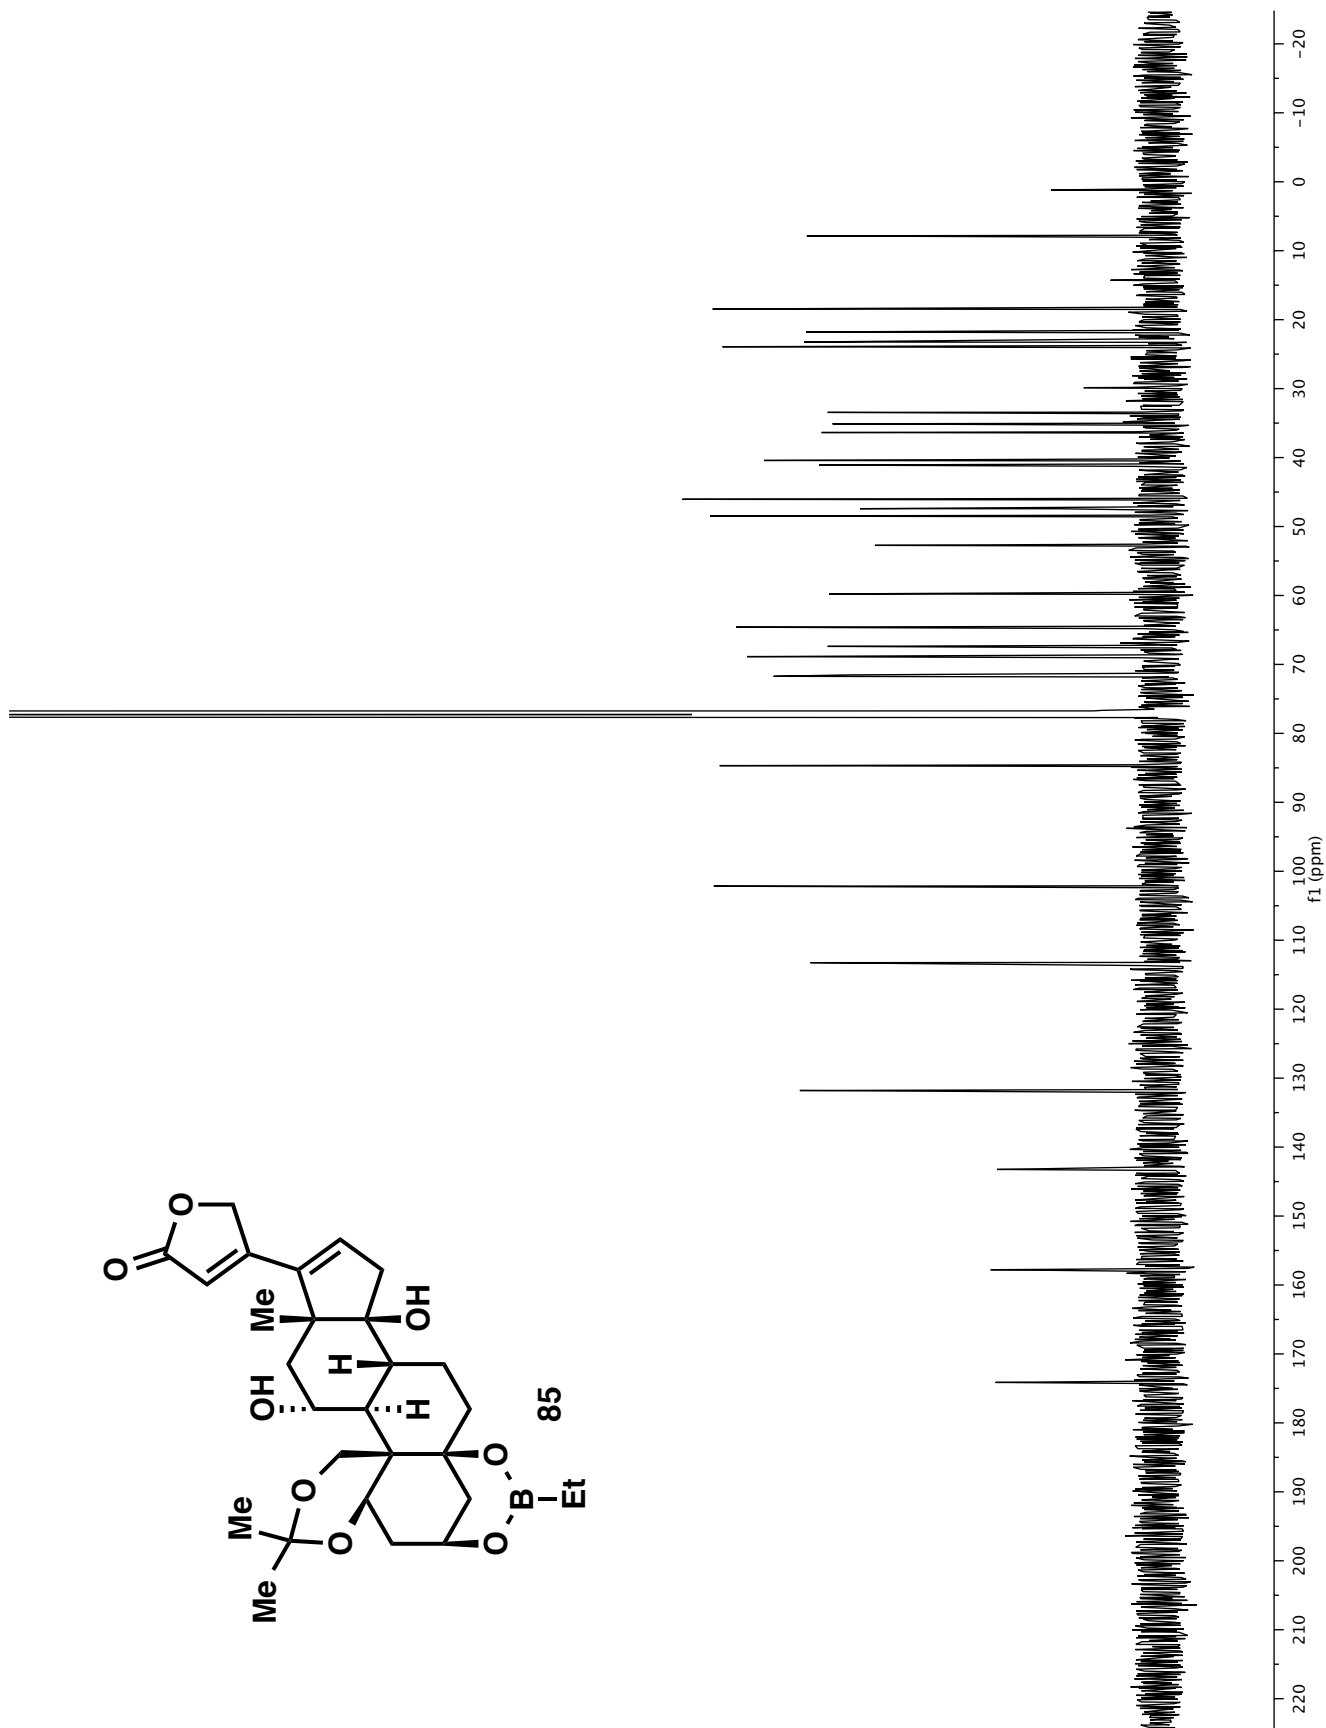

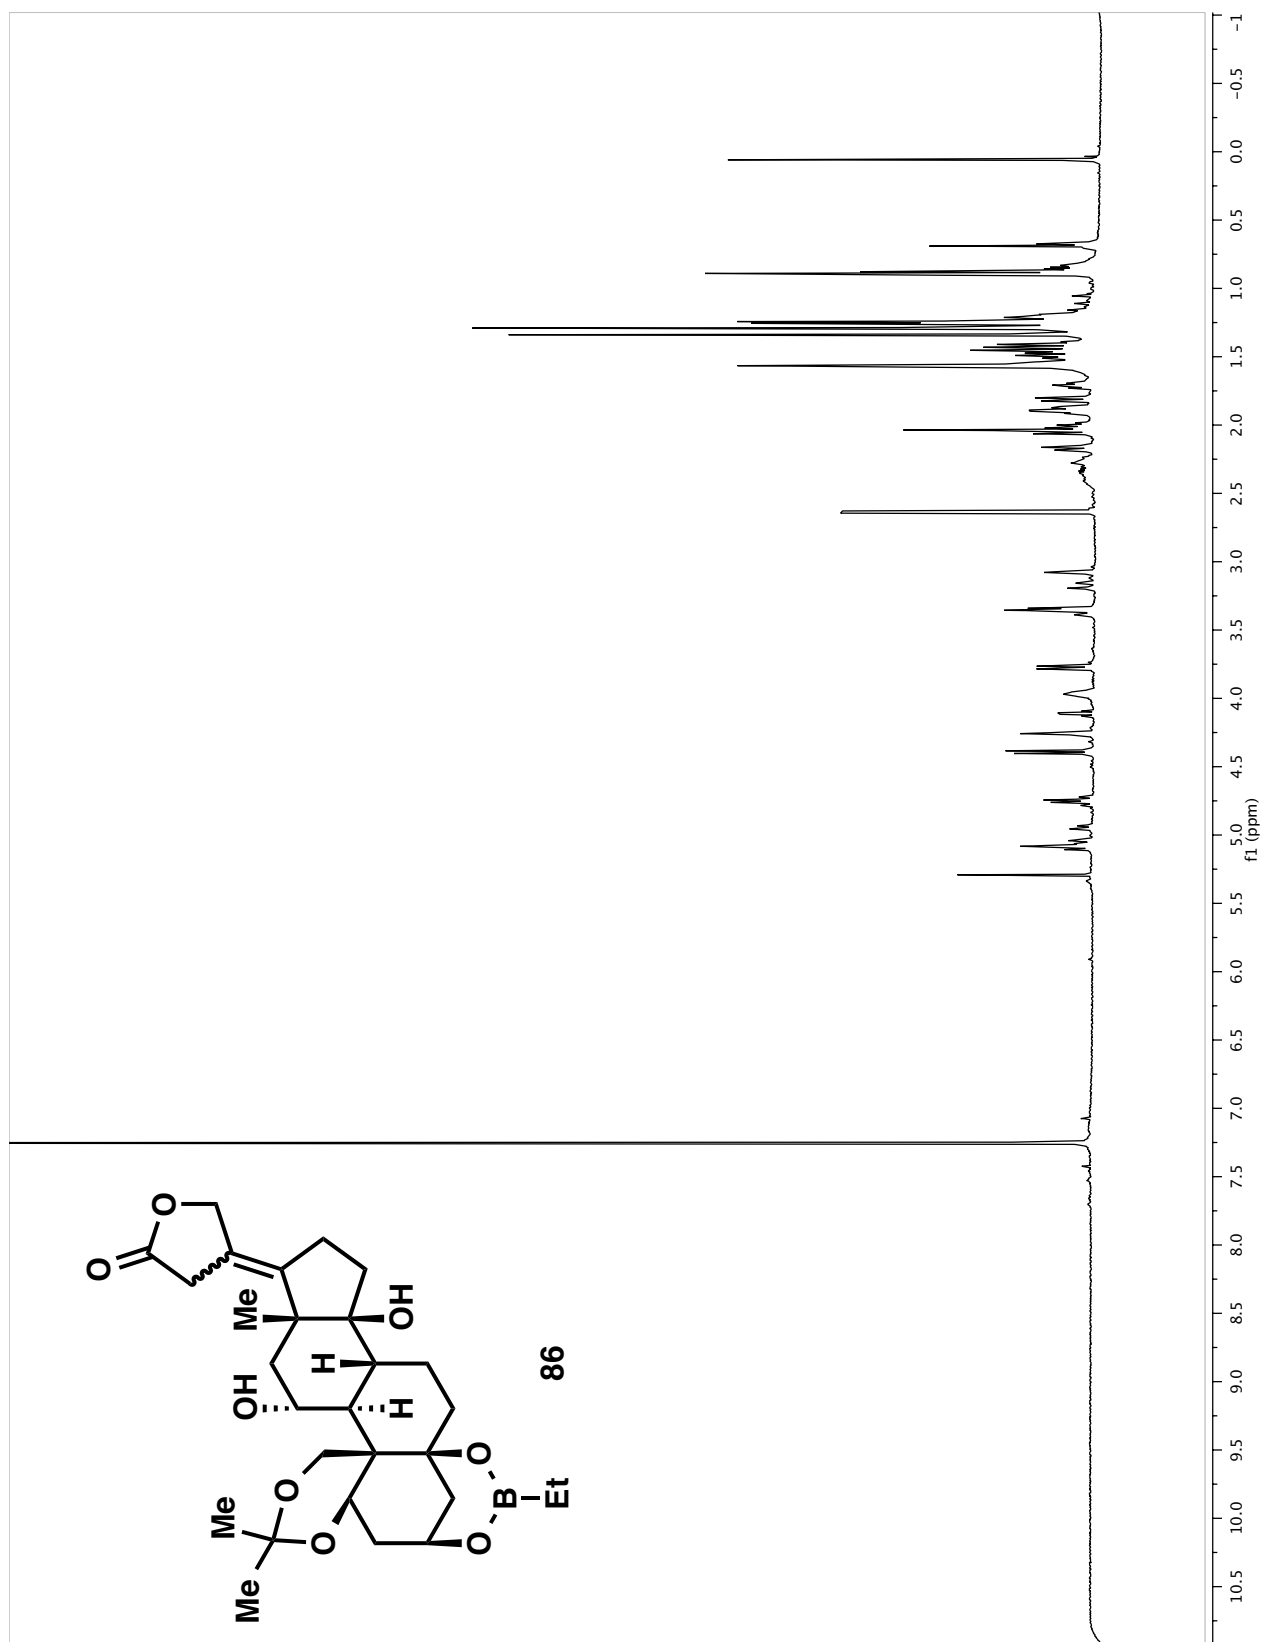

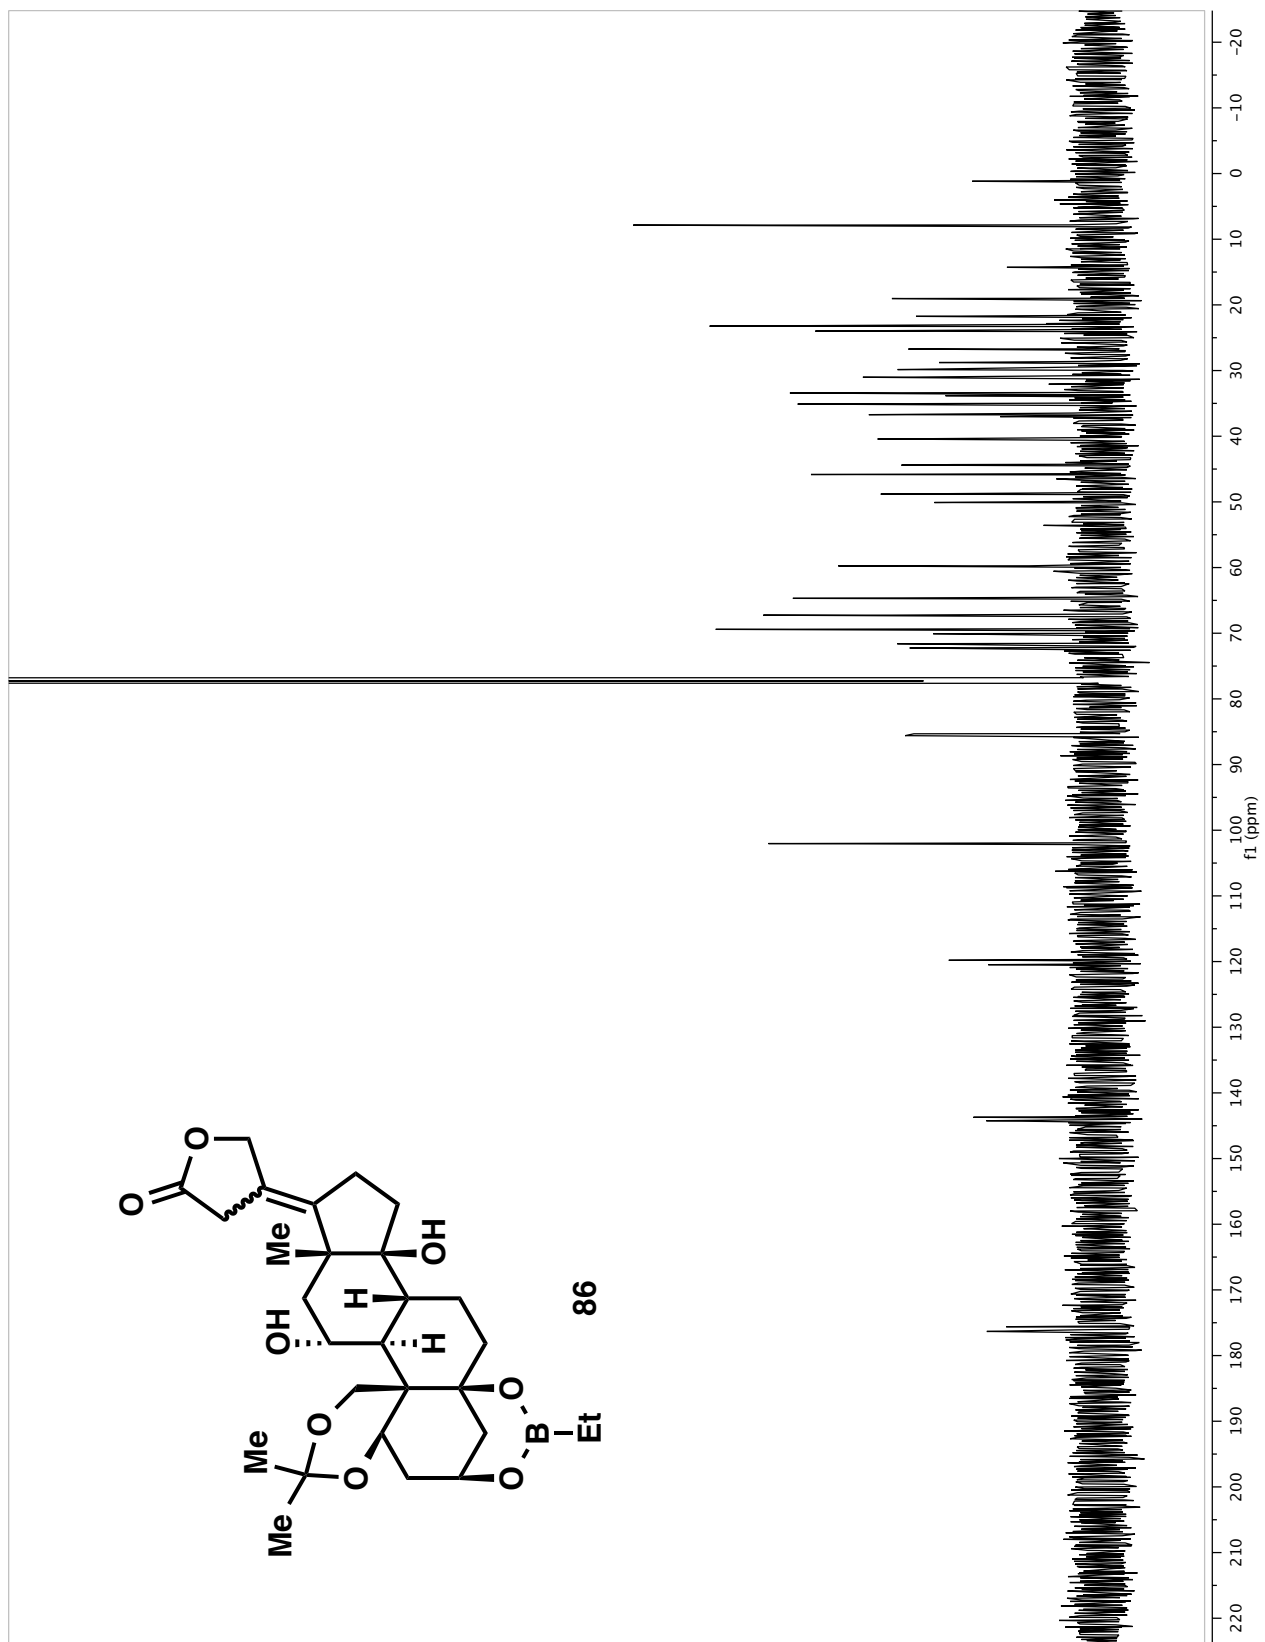

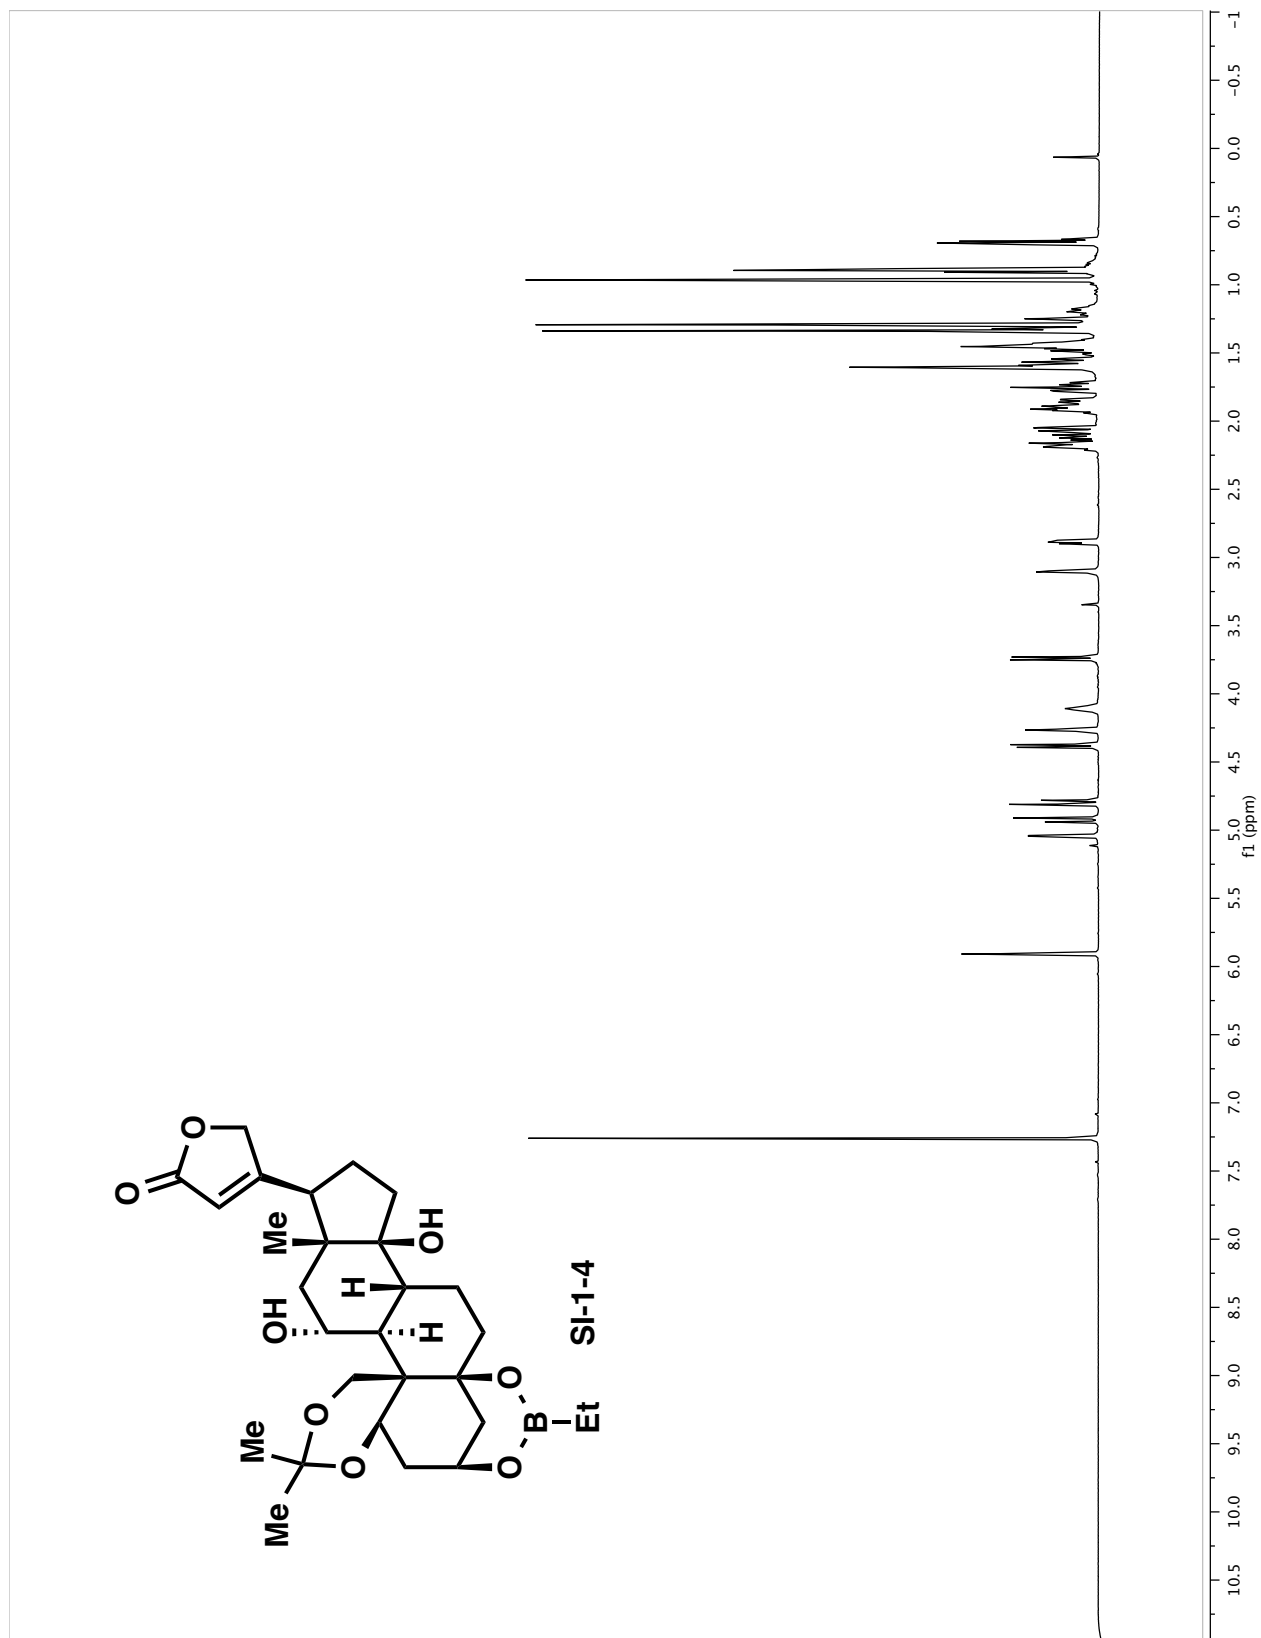



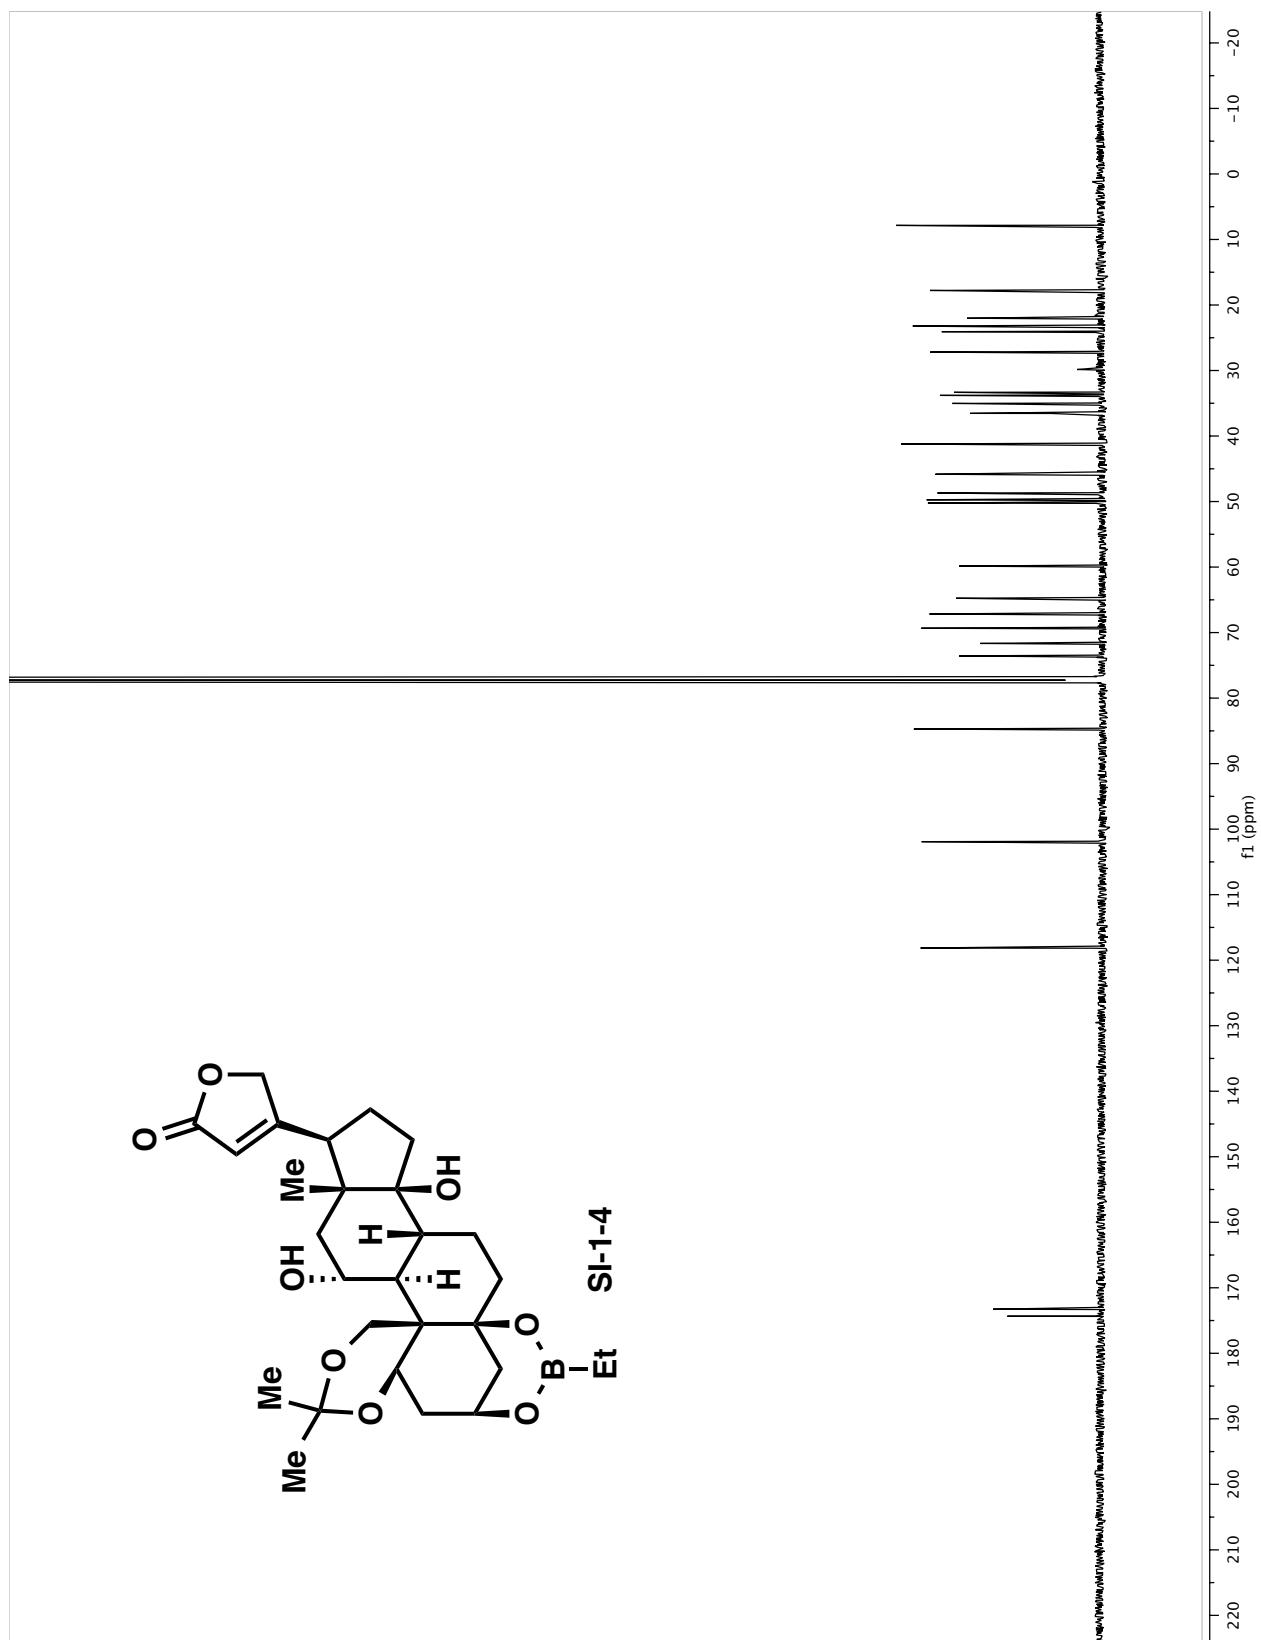

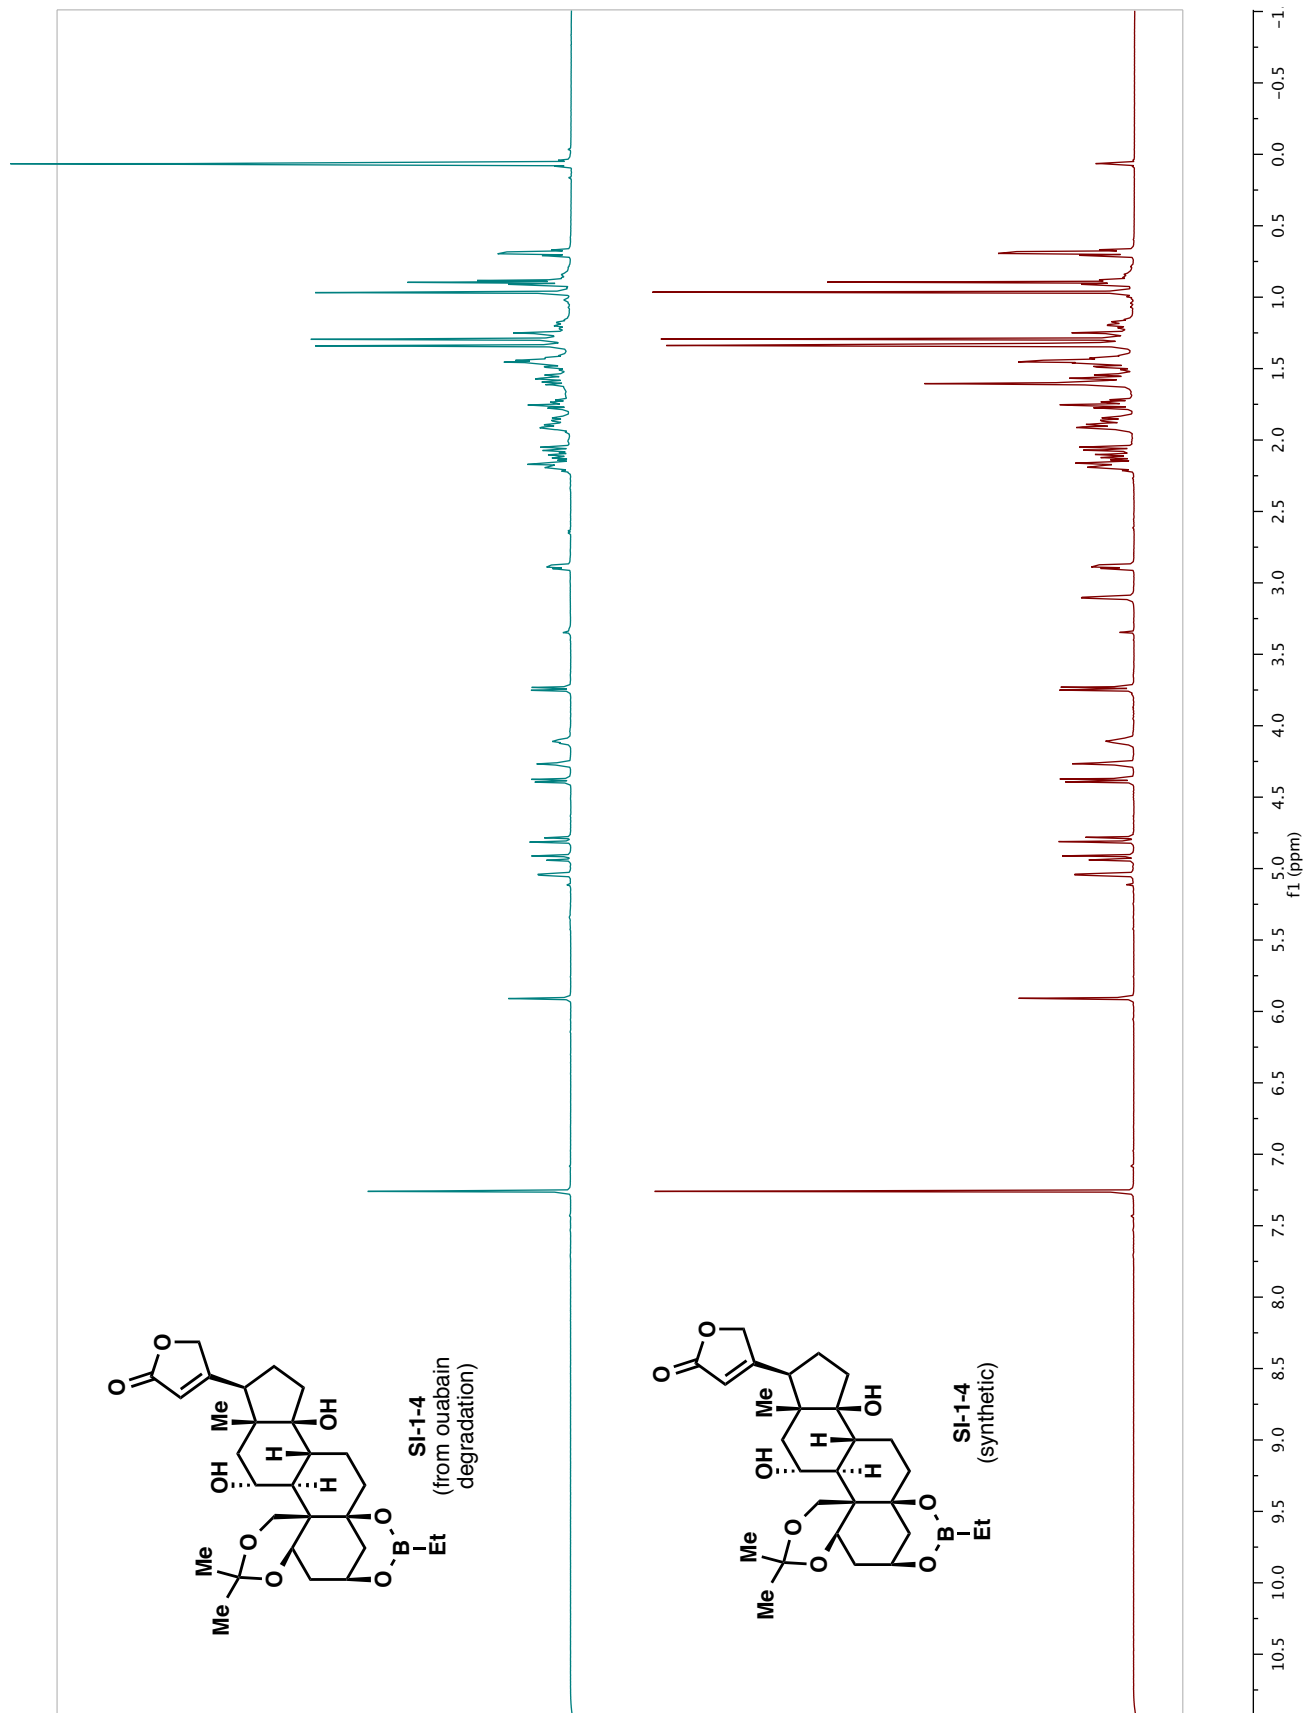

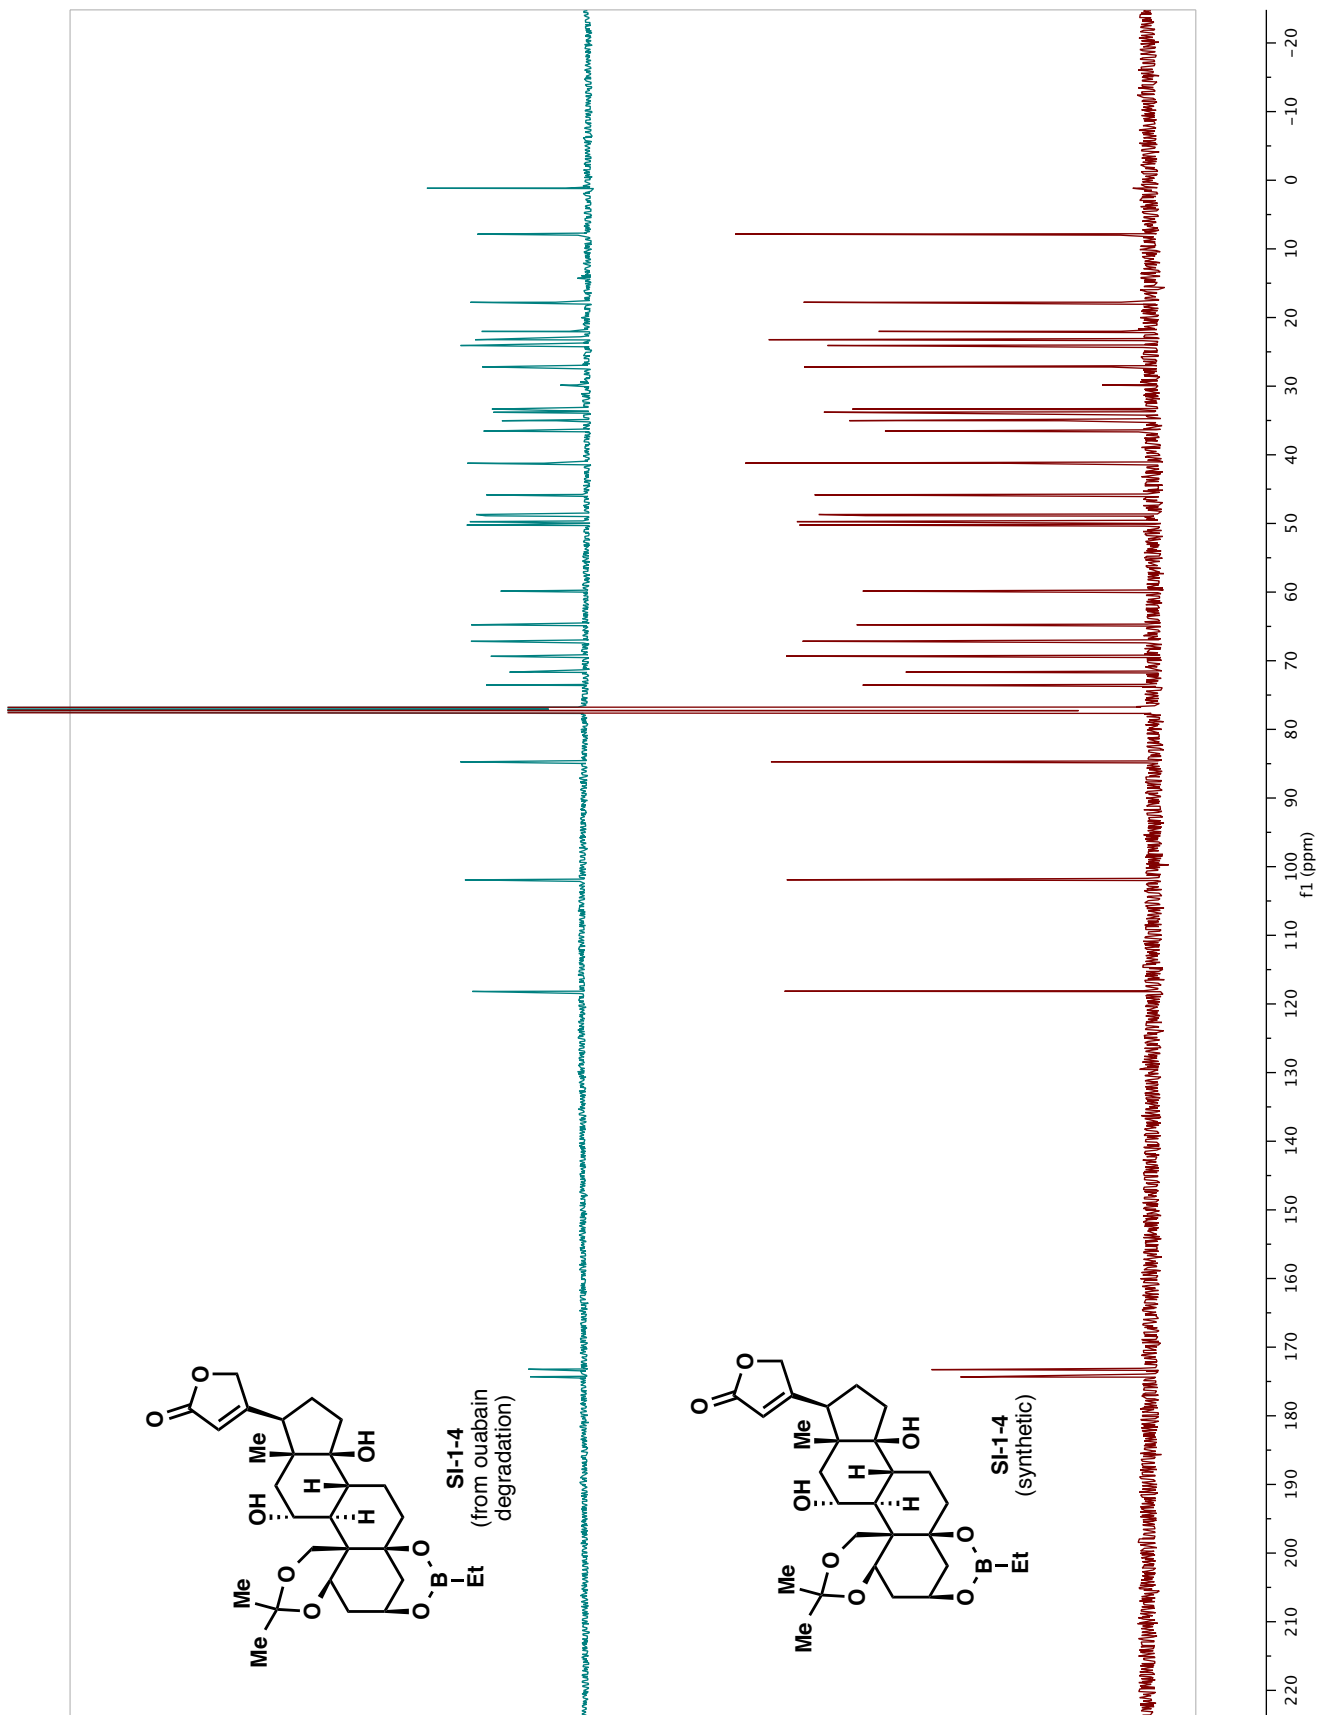

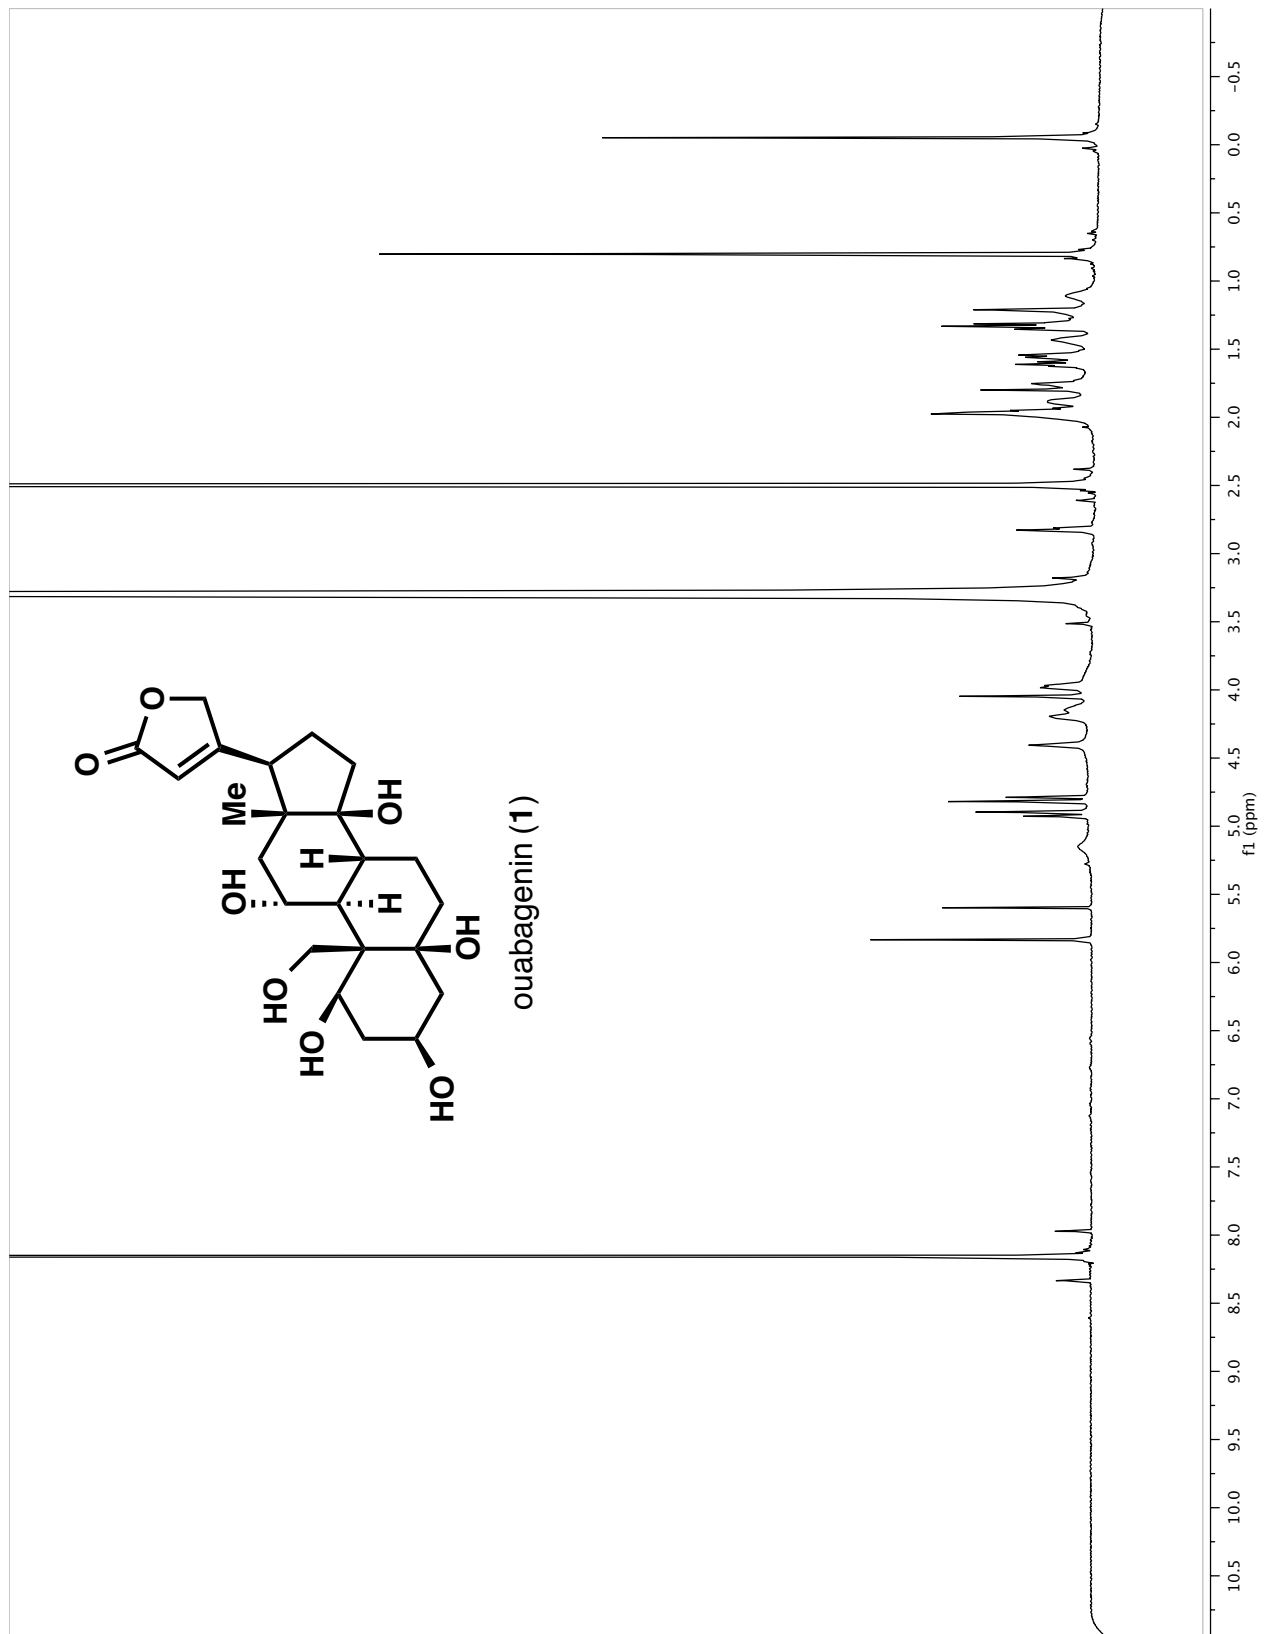

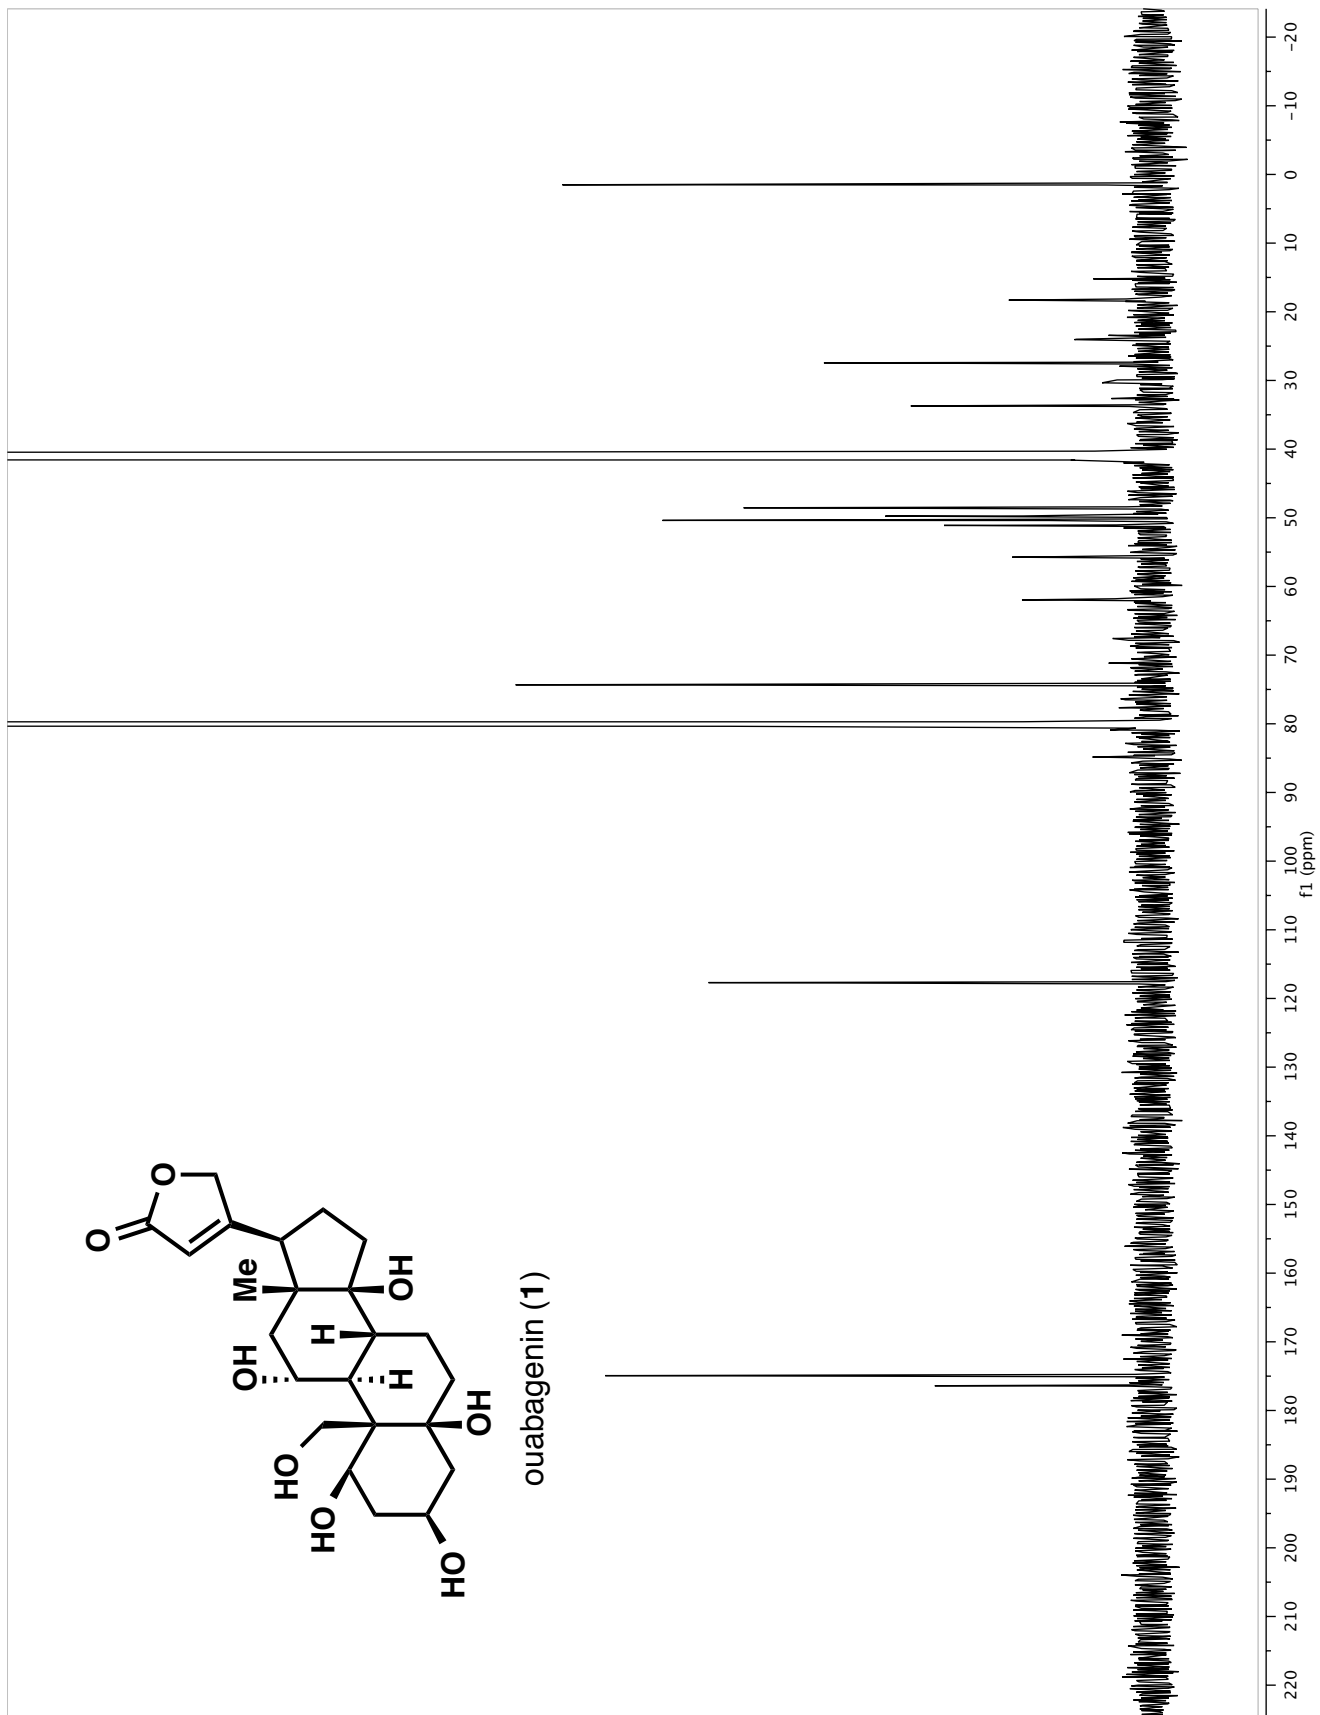

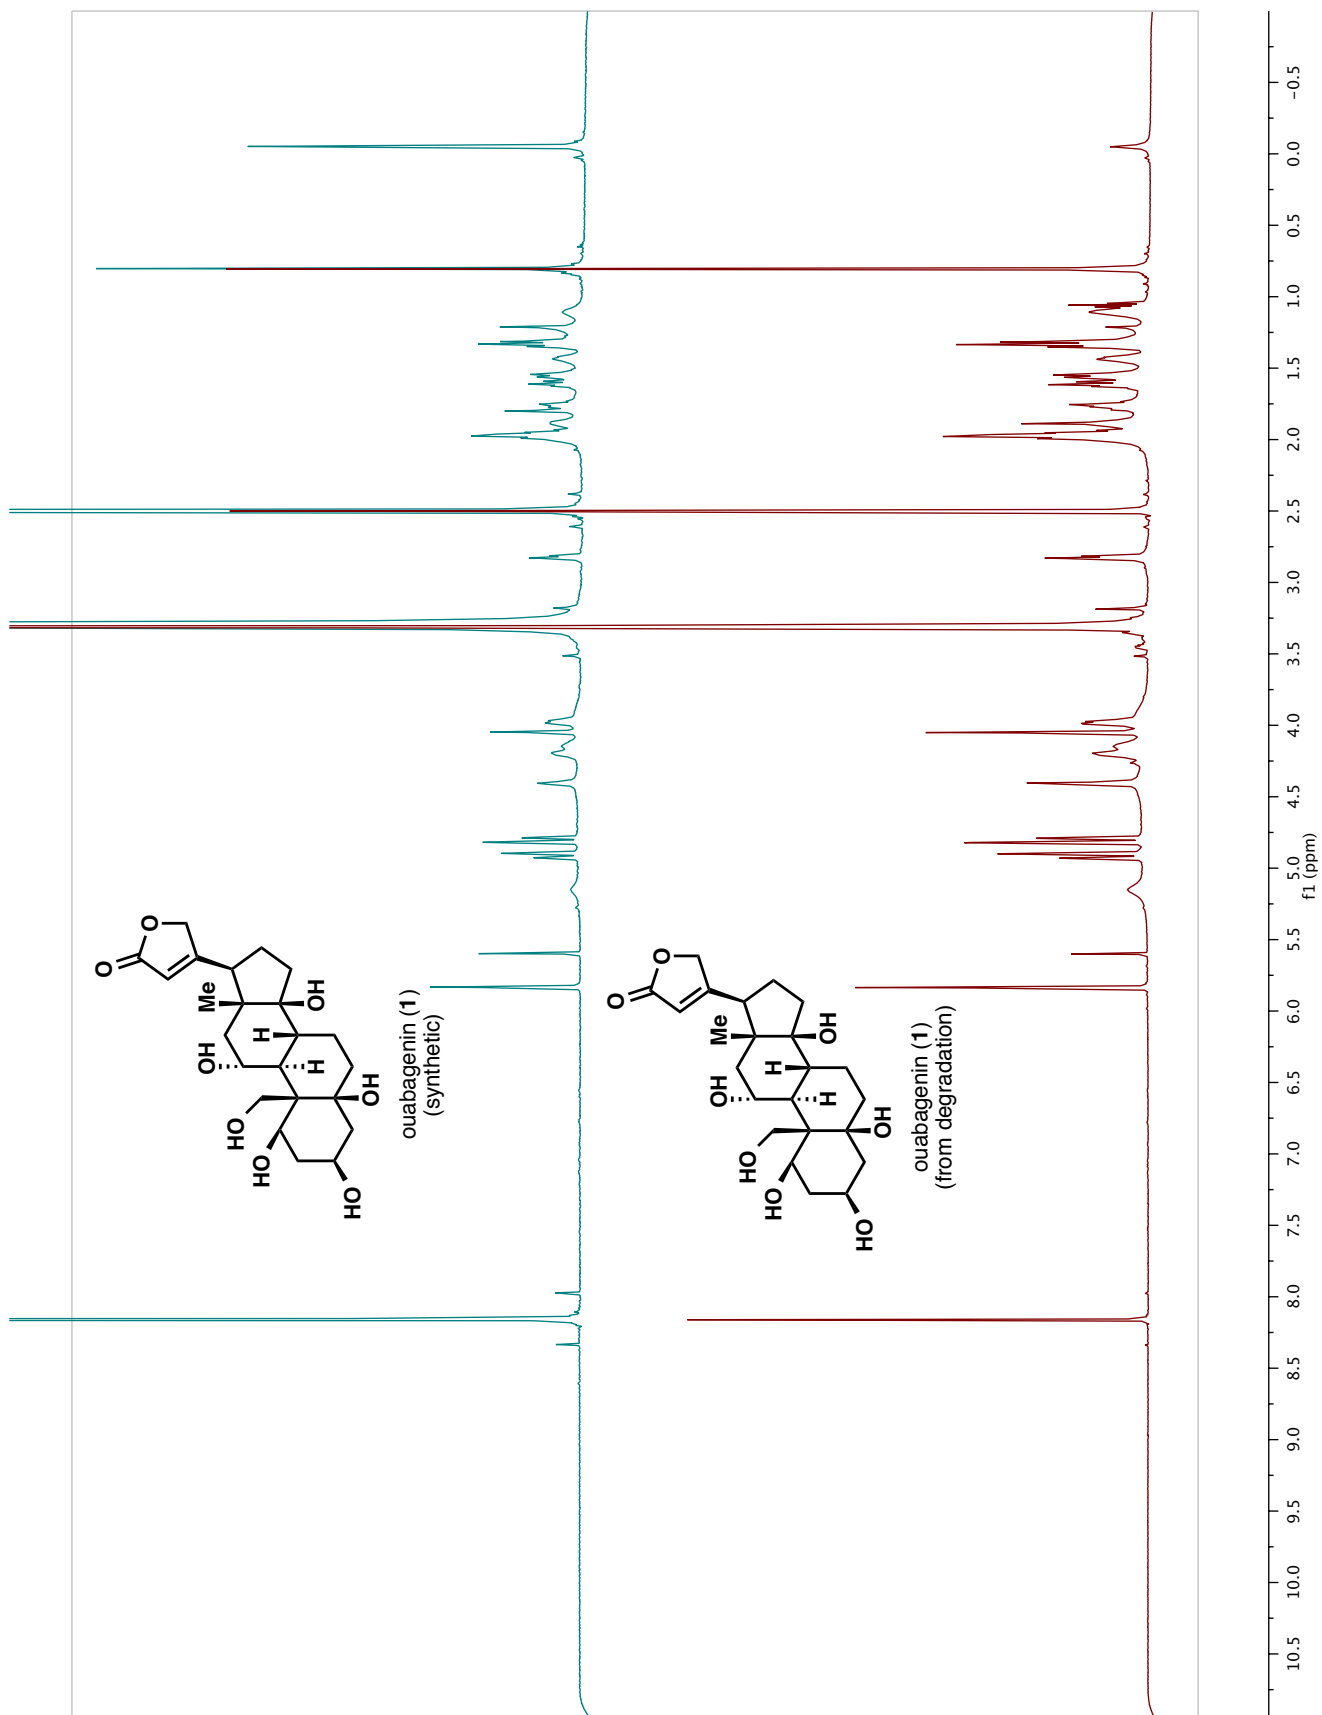

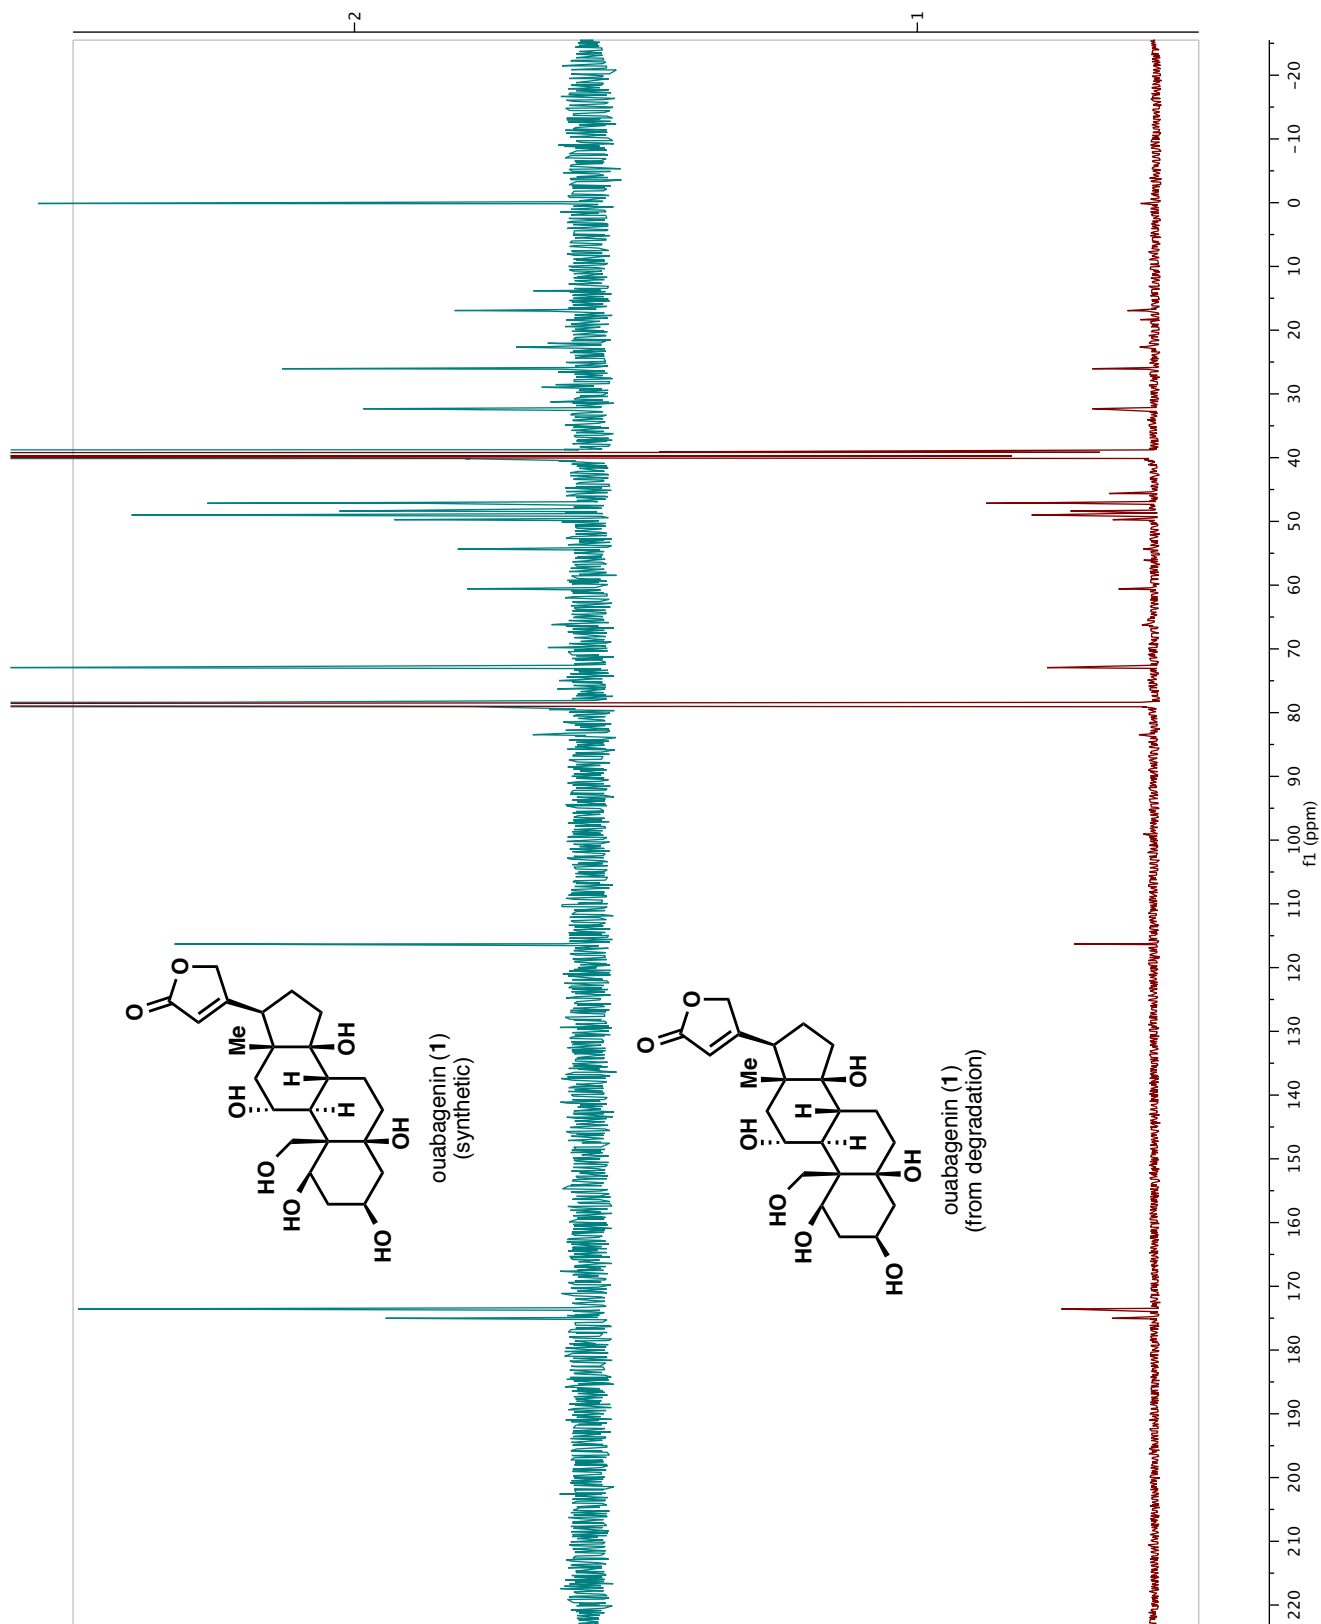

**Table S10.**  $^1\text{H}$  NMR data comparison between synthetic **SI-1-4** and that obtained from ouabain degradation

| Synthetic <b>SI-1-4</b> ( $\text{CDCl}_3$ , 600 MHz) | <b>SI-1-4</b> from degradation ( $\text{CDCl}_3$ , 600 MHz) |
|------------------------------------------------------|-------------------------------------------------------------|
| 5.91 (s, 1 H)                                        | 5.91 (s, 1 H)                                               |
| 5.04 (dd, $J = 5.3, 1.8$ Hz, 1 H)                    | 5.04 (dd, $J = 5.2, 1.8$ Hz, 1 H)                           |
| 4.93 (dd, $J = 18, 1.7$ Hz, 1 H)                     | 4.93 (dd, $J = 18.0, 1.8$ Hz, 1 H)                          |
| 4.80 (dd, $J = 17.9, 1.7$ Hz, 1 H)                   | 4.80 (dd, $J = 17.9, 1.8$ Hz, 1 H)                          |
| 4.38 (d, $J = 12.1$ Hz, 1 H)                         | 4.39 (d, $J = 12.0$ Hz, 1 H)                                |
| 4.27 (s, 1 H)                                        | 4.27 (s, 1 H)                                               |
| 4.11 (td, $J = 7.9, 4.0$ Hz, 1 H)                    | 4.11 (td, $J = 8.1, 3.9$ Hz, 1 H)                           |
| 3.74 (d, $J = 12.1$ Hz, 1 H)                         | 3.74 (d, $J = 12.2$ Hz, 1 H)                                |
| 3.10 (d, $J = 4.2$ Hz, 1 H)                          | 2.89 (dd, $J = 9.2, 6.3$ Hz, 1 H)                           |
| 2.89 (dd, $J = 9.0, 6.2$ Hz, 1 H)                    | 2.89 (dd, $J = 9.2, 6.3$ Hz, 1 H)                           |
| 2.22–2.15 (m, 2 H)                                   | 2.22–2.15 (m, 2 H)                                          |
| 2.11 (dt, 13.7, 9.7 Hz, 1 H)                         | 2.11 (dt, $J = 13.5, 9.6$ Hz, 1 H)                          |
| 2.06 (dd, 13.7, 1.9 Hz, 1 H)                         | 2.06 (dd, $J = 13.7, 1.9$ Hz, 1 H)                          |
| 1.95–1.82 (m, 3 H)                                   | 1.95–1.82 (m, 3 H)                                          |
| 1.80–1.70 (m, 2 H)                                   | 1.80–1.71 (m, 2 H)                                          |
| 1.61 (dt, $J = 13.9, 2.8$ Hz, 1 H)                   | 1.62–1.58 (m, 1 H)                                          |
| 1.55 (dt, $J = 13.9, 2.8$ Hz, 1 H)                   | 1.56 (dt, $J = 13.8, 3.0$ Hz, 1 H)                          |
| 1.53–1.39 (m, 3 H)                                   | 1.53–1.39 (m, 3 H)                                          |
| 1.34 (s, 3 H)                                        | 1.34 (s, 3 H)                                               |
| 1.29 (s, 3 H)                                        | 1.30 (s, 3 H)                                               |
| 1.19 (m, 1 H)                                        | 1.20 (ddd, $J = 16.0, 11.6, 5.4$ Hz, 1 H)                   |
| 0.97 (s, 3 H)                                        | 0.97 (s, 3 H)                                               |
| 0.90 (t, $J = 7.7$ Hz, 3 H)                          | 0.90 (t, $J = 7.8$ Hz, 2 H)                                 |
| 0.69 (q, $J = 7.7$ Hz, 2 H)                          | 0.69 (q, $J = 7.8$ Hz, 3 H)                                 |

**Table S11.**  $^{13}\text{C}$  NMR data comparison between synthetic **SI-1-4** and that obtained from ouabain degradation



| Synthetic <b>SI-1-4</b> (CDCl <sub>3</sub> , 600 MHz) | <b>SI-1-4</b> from degradation (CDCl <sub>3</sub> , 600 MHz) |
|-------------------------------------------------------|--------------------------------------------------------------|
| 174.3                                                 | 174.3                                                        |
| 173.3                                                 | 173.2                                                        |
| 118.2                                                 | 118.2                                                        |
| 101.9                                                 | 101.9                                                        |
| 84.7                                                  | 84.7                                                         |
| 73.6                                                  | 73.5                                                         |
| 71.7                                                  | 71.7                                                         |
| 69.3                                                  | 69.4                                                         |
| 67.2                                                  | 67.2                                                         |
| 64.8                                                  | 64.8                                                         |
| 59.9                                                  | 59.9                                                         |
| 50.2                                                  | 50.2                                                         |
| 49.7                                                  | 49.7                                                         |
| 48.9                                                  | 48.9                                                         |
| 48.7                                                  | 48.7                                                         |
| 45.8                                                  | 45.8                                                         |
| 41.2                                                  | 41.2                                                         |
| 36.6                                                  | 36.6                                                         |
| 35.0                                                  | 35.0                                                         |
| 33.8                                                  | 33.8                                                         |
| 33.3                                                  | 33.3                                                         |
| 29.8                                                  | 29.9                                                         |
| 27.2                                                  | 27.2                                                         |
| 24.1                                                  | 24.1                                                         |
| 23.2                                                  | 23.2                                                         |
| 22.0                                                  | 22.0                                                         |
| 17.8                                                  | 17.8                                                         |
| 7.9                                                   | 7.9                                                          |

**Table S12.** <sup>1</sup>H NMR data comparison between synthetic ouabagenin (**1**) and that from degradation

| Synthetic <b>1</b> (2:1 (CD <sub>3</sub> ) <sub>2</sub> SO:CDCl <sub>3</sub> , 151 MHz) | From degradation (2:1 (CD <sub>3</sub> ) <sub>2</sub> SO:CDCl <sub>3</sub> , 151 MHz) |
|-----------------------------------------------------------------------------------------|---------------------------------------------------------------------------------------|
| 5.84 (s, 1 H)                                                                           | 5.84 (s, 1 H)                                                                         |
| 4.92 (d, J = 18.4 Hz, 1 H)                                                              | 4.92 (d, J = 18.3 Hz, 1 H)                                                            |
| 4.81 (dd, J = 18.4, 1.8 Hz, 1 H)                                                        | 4.81 (dd, J = 18.3, 1.8 Hz, 1 H)                                                      |
| 4.41 (s, 1 H)                                                                           | 4.41 (d, J = 4.8 Hz, 1 H)                                                             |

|                                  |                                  |
|----------------------------------|----------------------------------|
| 4.21 (d, J = 10.4 Hz, 1 H)       | 4.20 (d, J = 10.3 Hz, 1 H)       |
| 4.20–4.10 (m, 1 H)               | 4.20–4.10 (m, 1 H)               |
| 3.98 (d, J = 10.4 Hz, 1 H)       | 3.99 (d, J = 10.3 Hz, 1 H)       |
| 2.83 (t, J = 7.1 Hz, 1 H)        | 2.83 (t, J = 7.2 Hz, 1 H)        |
| 2.03–1.93 (m, 3 H)               | 2.03–1.93 (m, 3 H)               |
| 1.92–1.85 (m, 1 H)               | 1.92–1.85 (m, 1 H)               |
| 1.82–1.72 (m, 2 H)               | 1.81–1.70 (m, 2 H)               |
| 1.61 (dd, J = 11.4, 8.6 Hz, 1 H) | 1.61 (dd, J = 11.4, 8.6 Hz, 1 H) |
| 1.56 (dd, J = 13.5, 4.5 Hz, 1 H) | 1.56 (dd, J = 13.5, 4.5 Hz, 1 H) |
| 1.49–1.40 (m, 1 H)               | 1.44 (p, J = 7.9, 5.9 Hz, 1 H)   |
| 1.37–1.28 (m, 2 H)               | 1.37–1.28 (m, 2 H)               |
| 1.22 (s, 1 H)                    |                                  |
| 1.11 (s, 1 H)                    | 1.11 (s, 1 H)                    |
| 0.81 (s, 3 H)                    | 0.81 (s, 3 H)                    |

**Table S13.**  $^{13}\text{C}$  NMR data comparison between synthetic ouabagenin (**1**) and that from degradation

| Synthetic <b>1</b> (2:1 (CD <sub>3</sub> ) <sub>2</sub> SO:CDCl <sub>3</sub> , 151 MHz) | From degradation (2:1 (CD <sub>3</sub> ) <sub>2</sub> SO:CDCl <sub>3</sub> , 151 MHz) |
|-----------------------------------------------------------------------------------------|---------------------------------------------------------------------------------------|
| 175.0                                                                                   | 175.0                                                                                 |
| 173.5                                                                                   | 173.6                                                                                 |
| 116.3                                                                                   | 116.3                                                                                 |
| 83.5                                                                                    | 83.5                                                                                  |
| 75.1                                                                                    | 74.9                                                                                  |
| 72.9                                                                                    | 72.9                                                                                  |
| 66.2                                                                                    | 66.3                                                                                  |
| 65.4                                                                                    | 65.4                                                                                  |
| 60.6                                                                                    | 60.6                                                                                  |
| 49.7                                                                                    | 49.7                                                                                  |
| 49.0                                                                                    | 49.0                                                                                  |
| 48.6                                                                                    | 48.6                                                                                  |
| 48.4                                                                                    | 48.4                                                                                  |
| 47.2                                                                                    | 47.2                                                                                  |
| 40.1                                                                                    | 40.0                                                                                  |
| 32.3                                                                                    | 32.3                                                                                  |

|      |      |
|------|------|
| 26.0 | 26.0 |
| 22.7 | 22.6 |
| 16.9 | 16.9 |

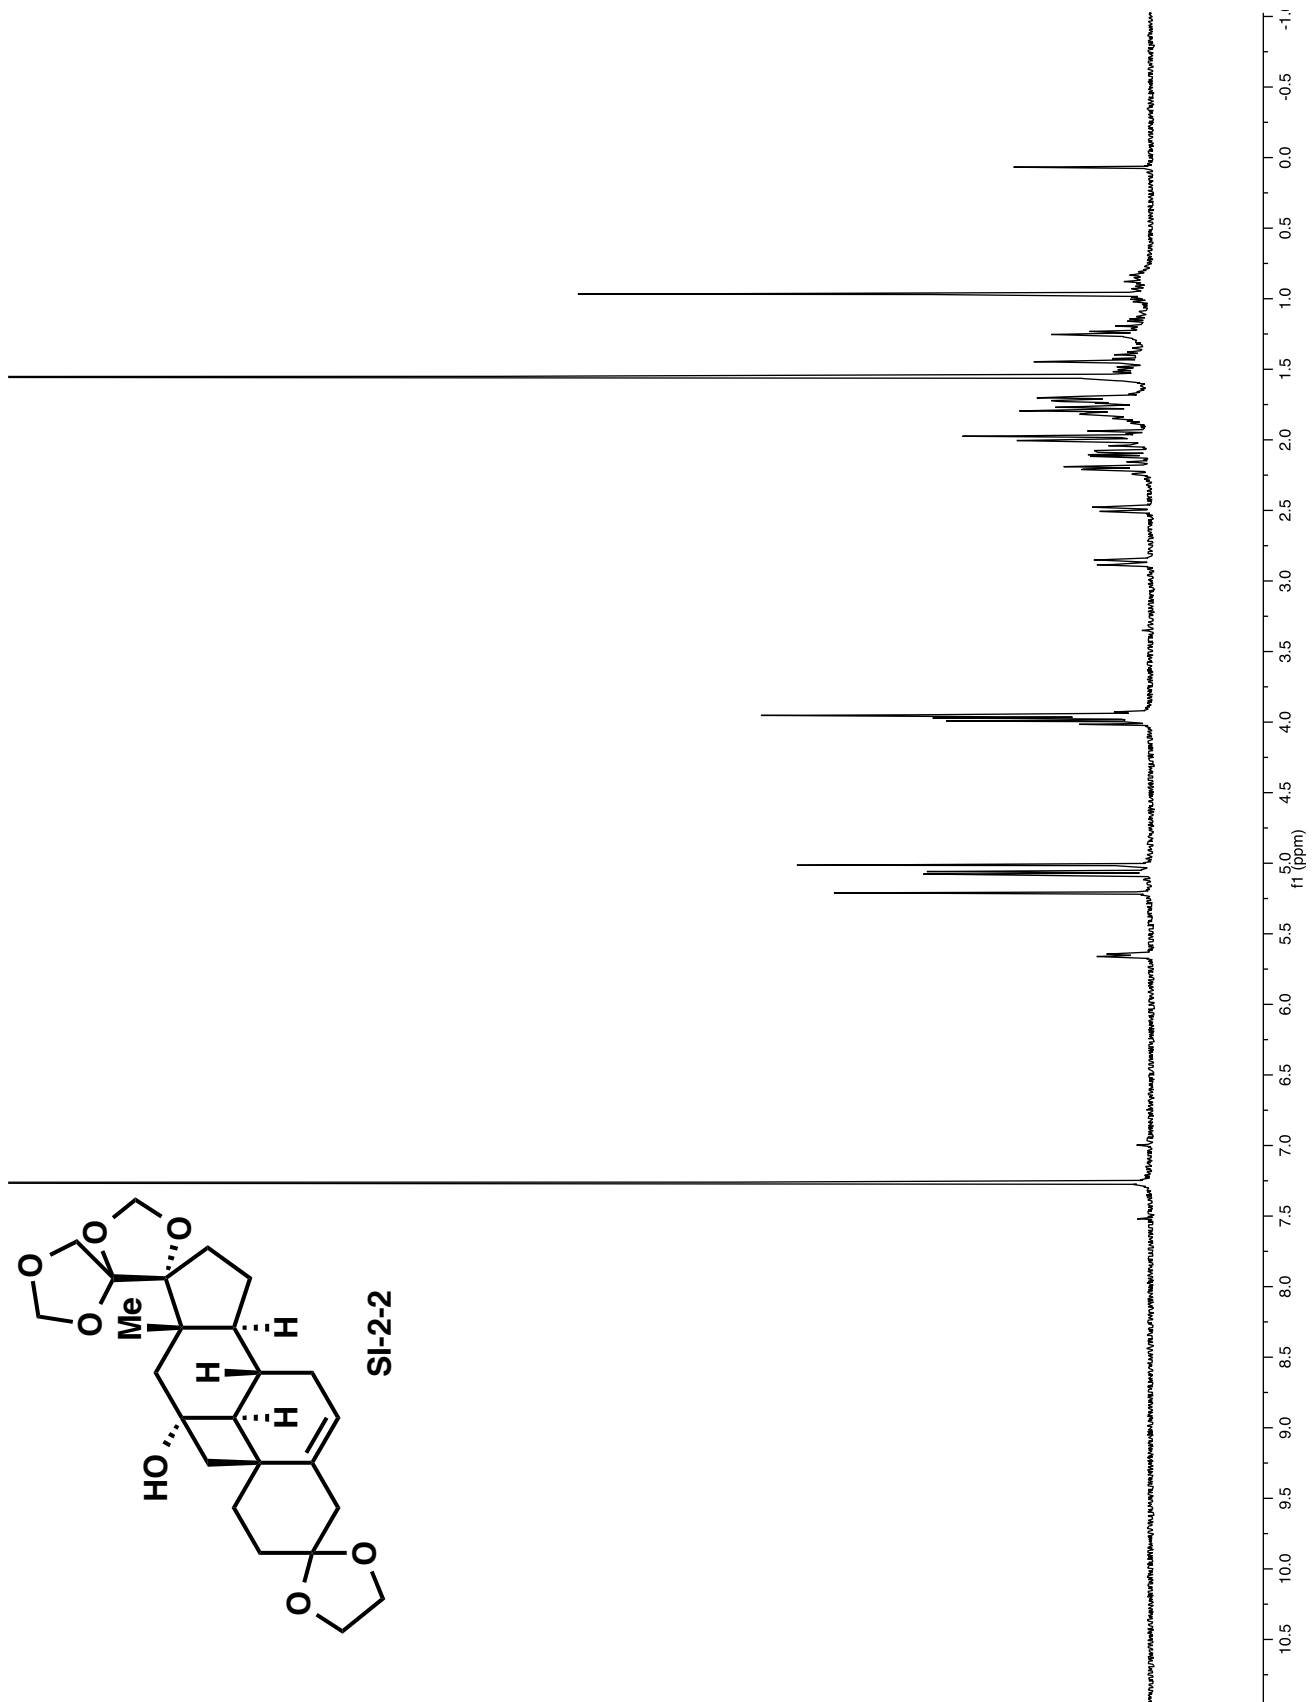

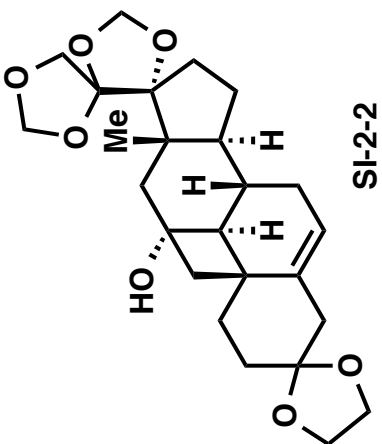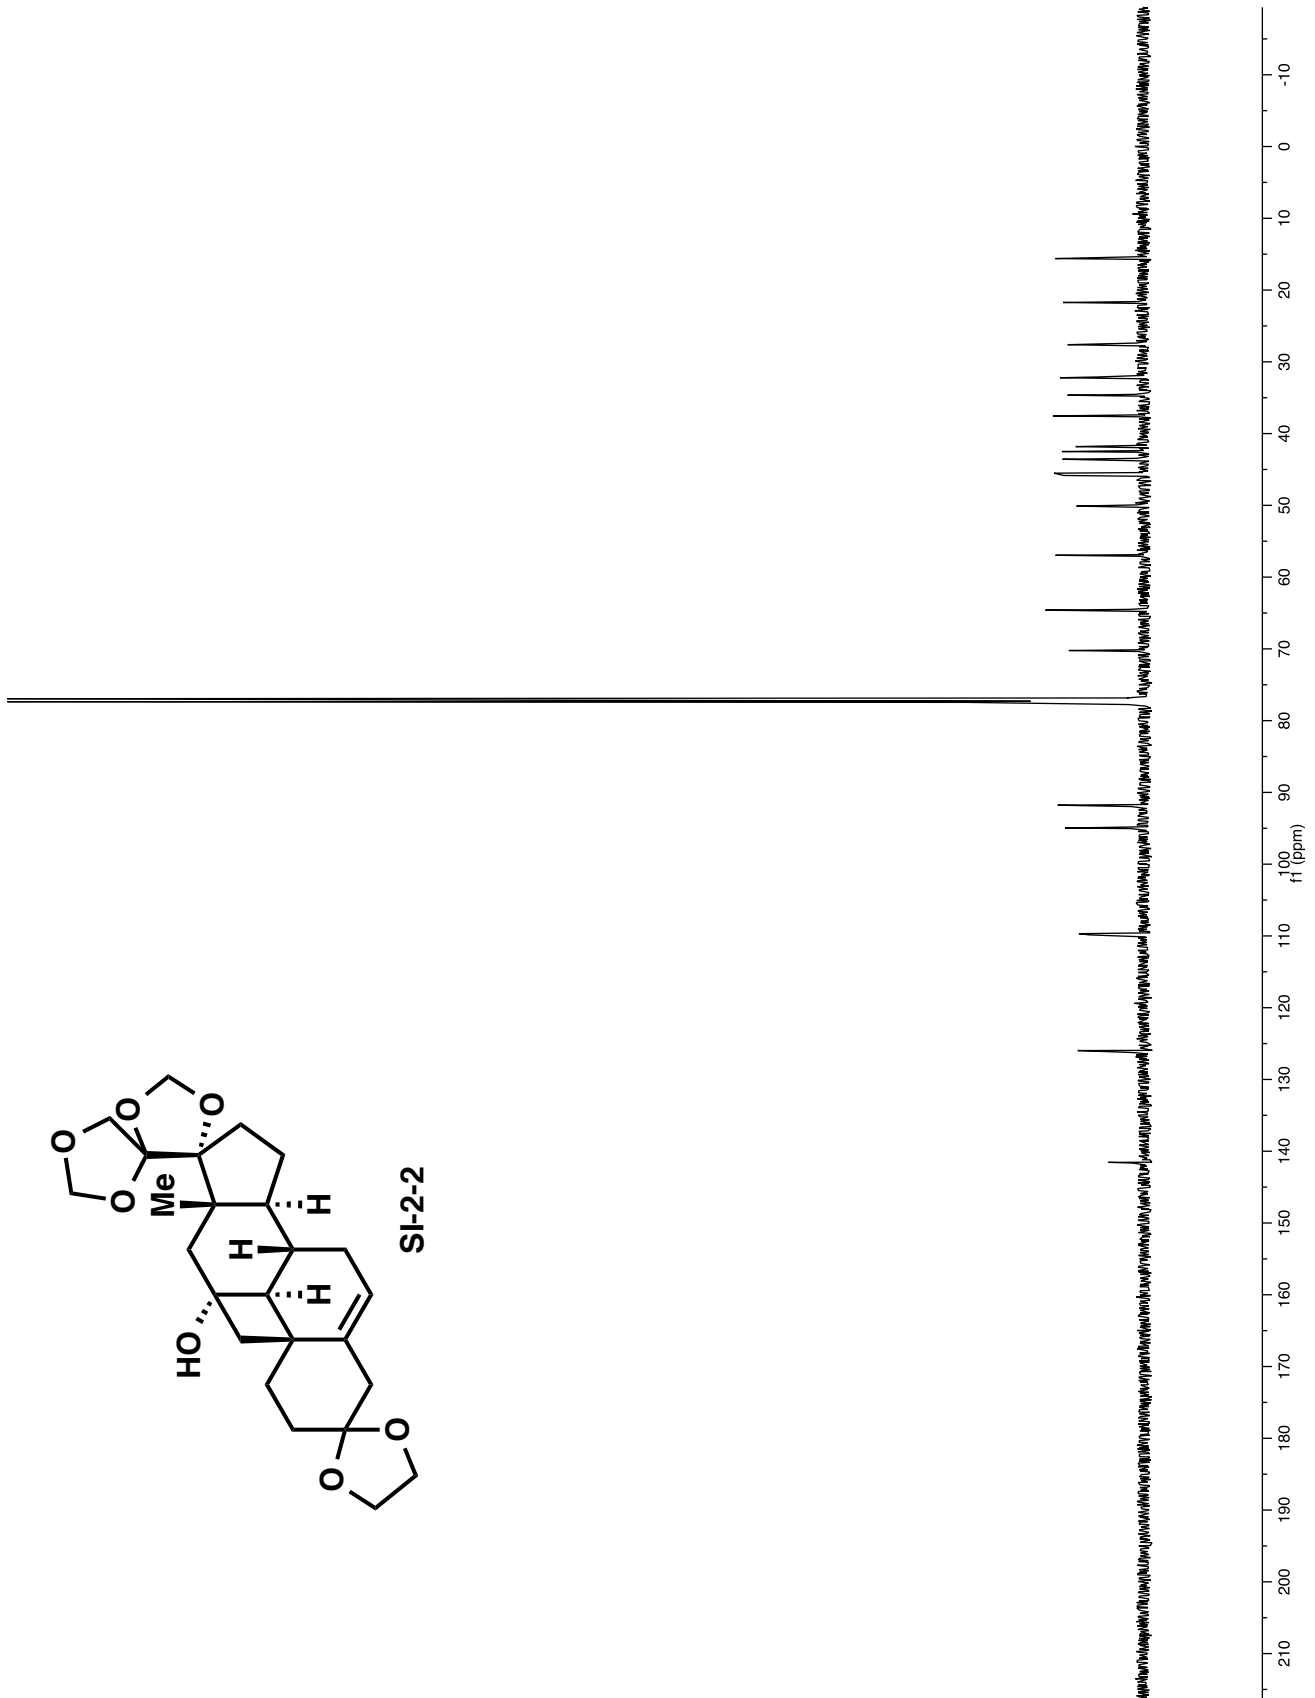

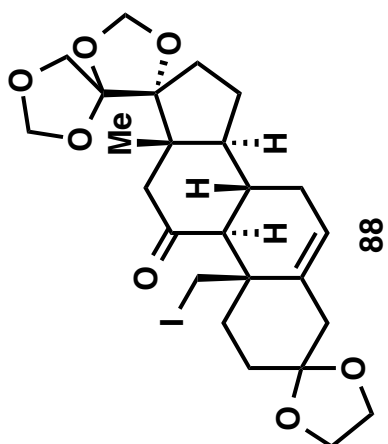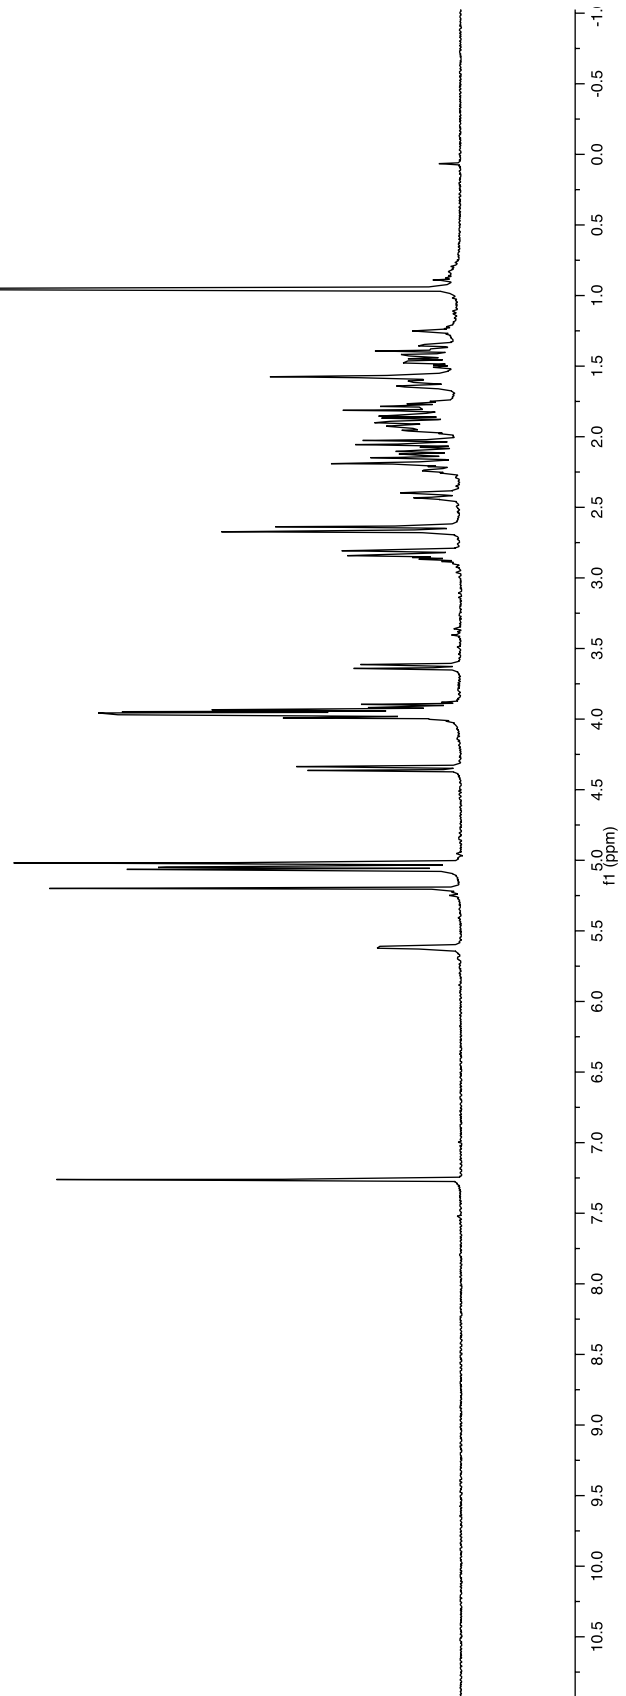

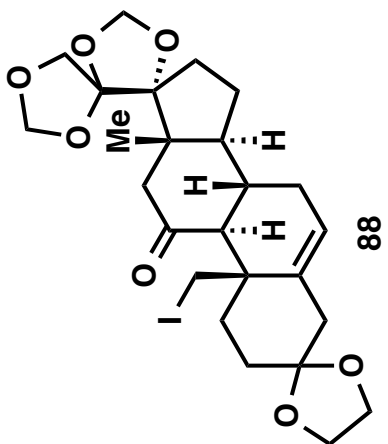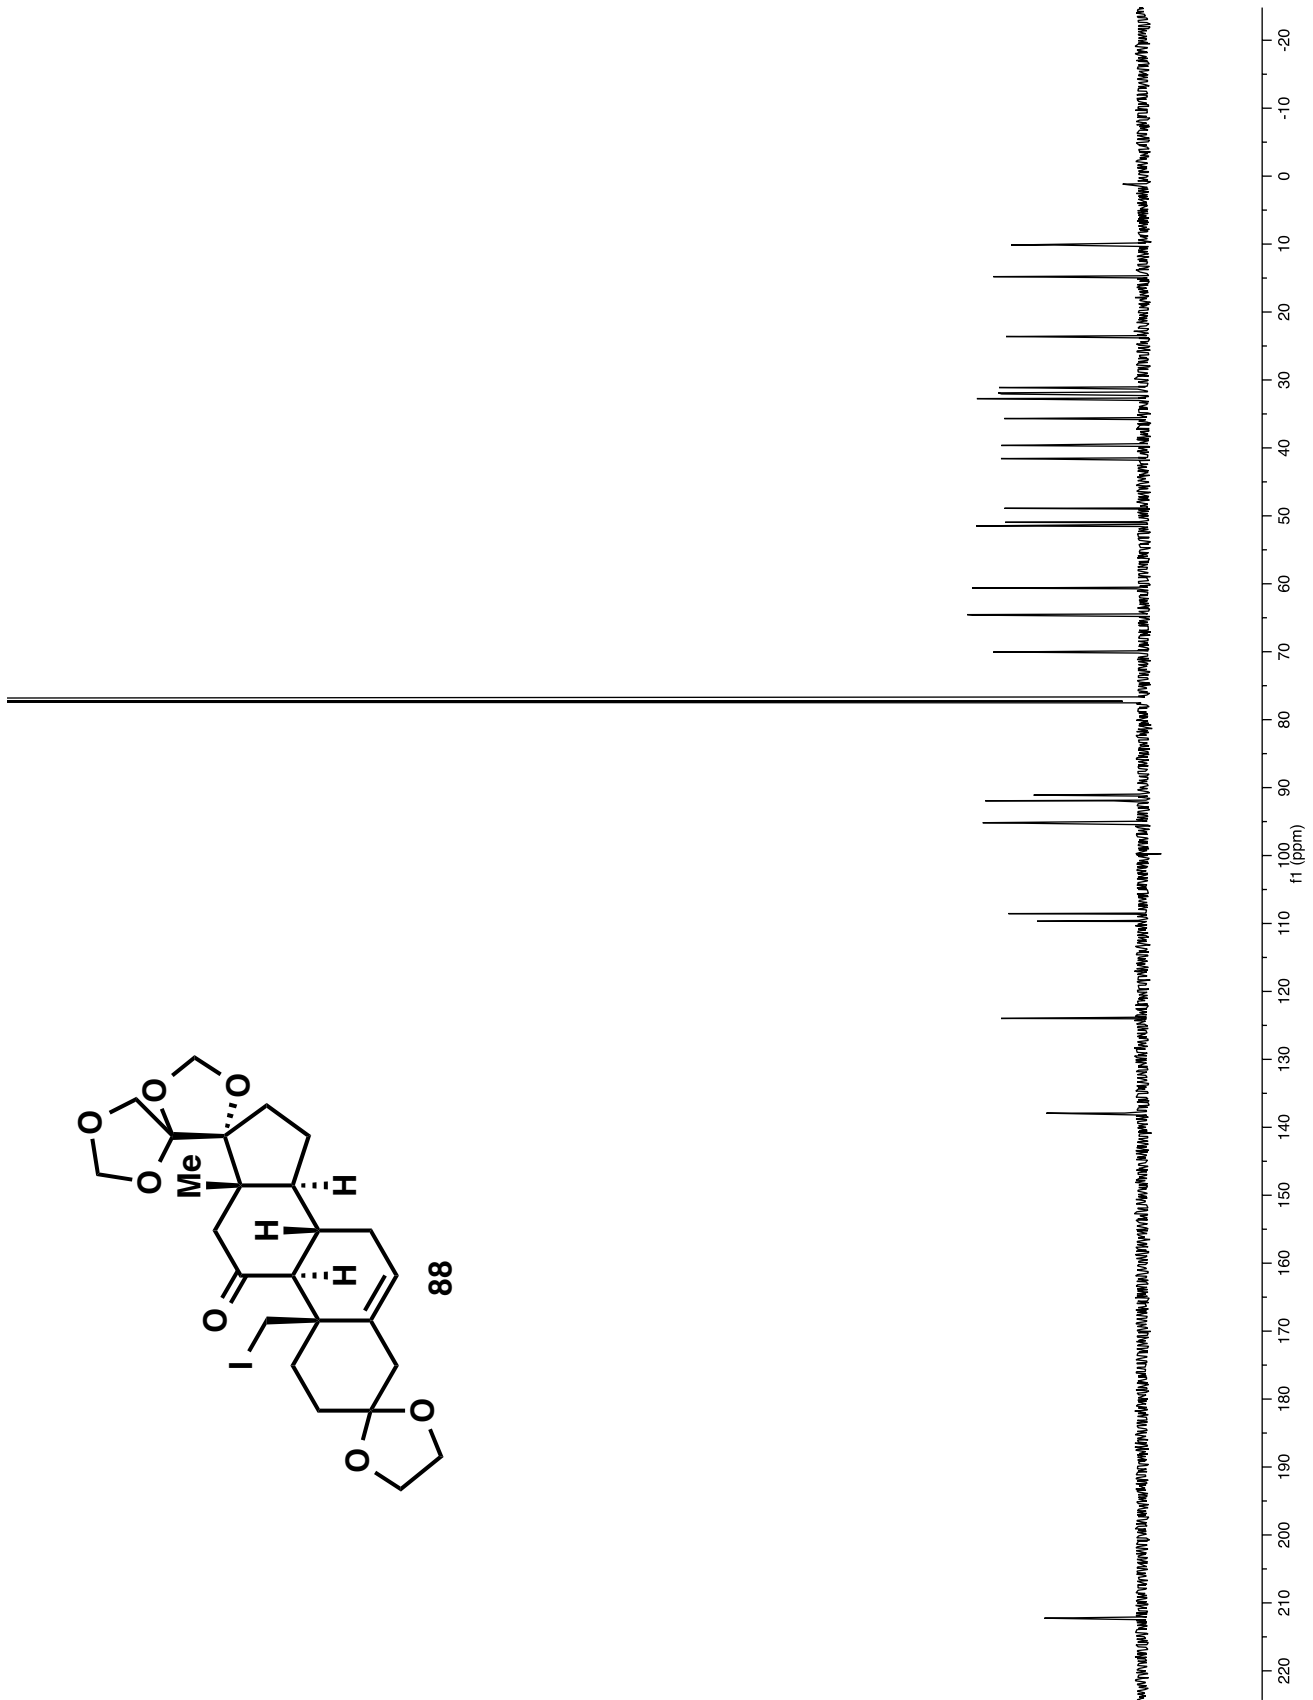

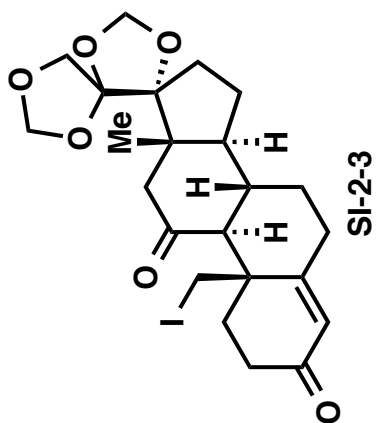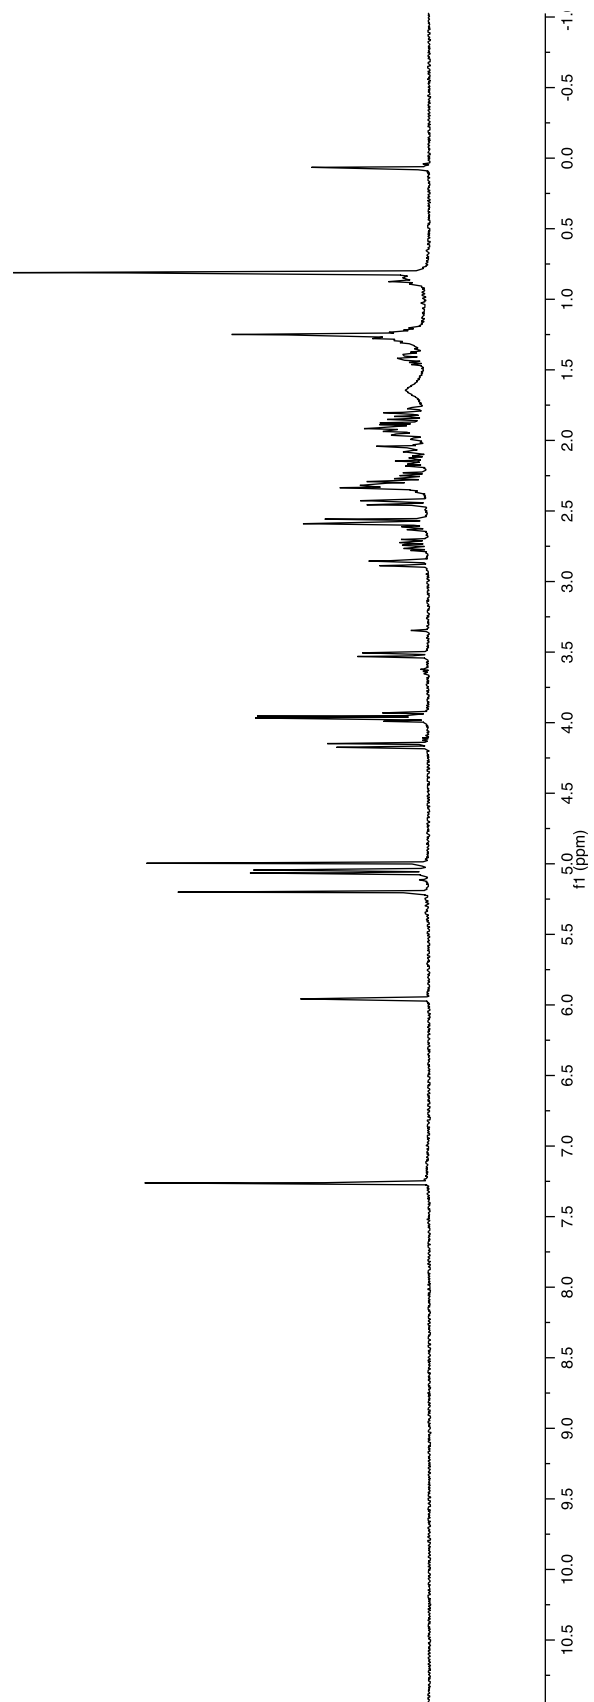



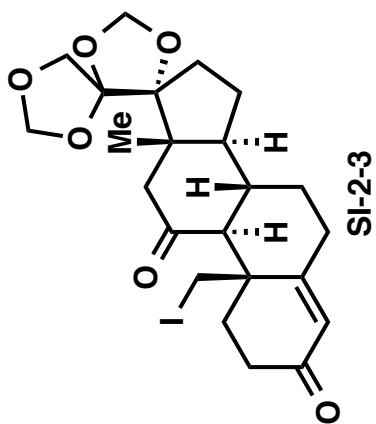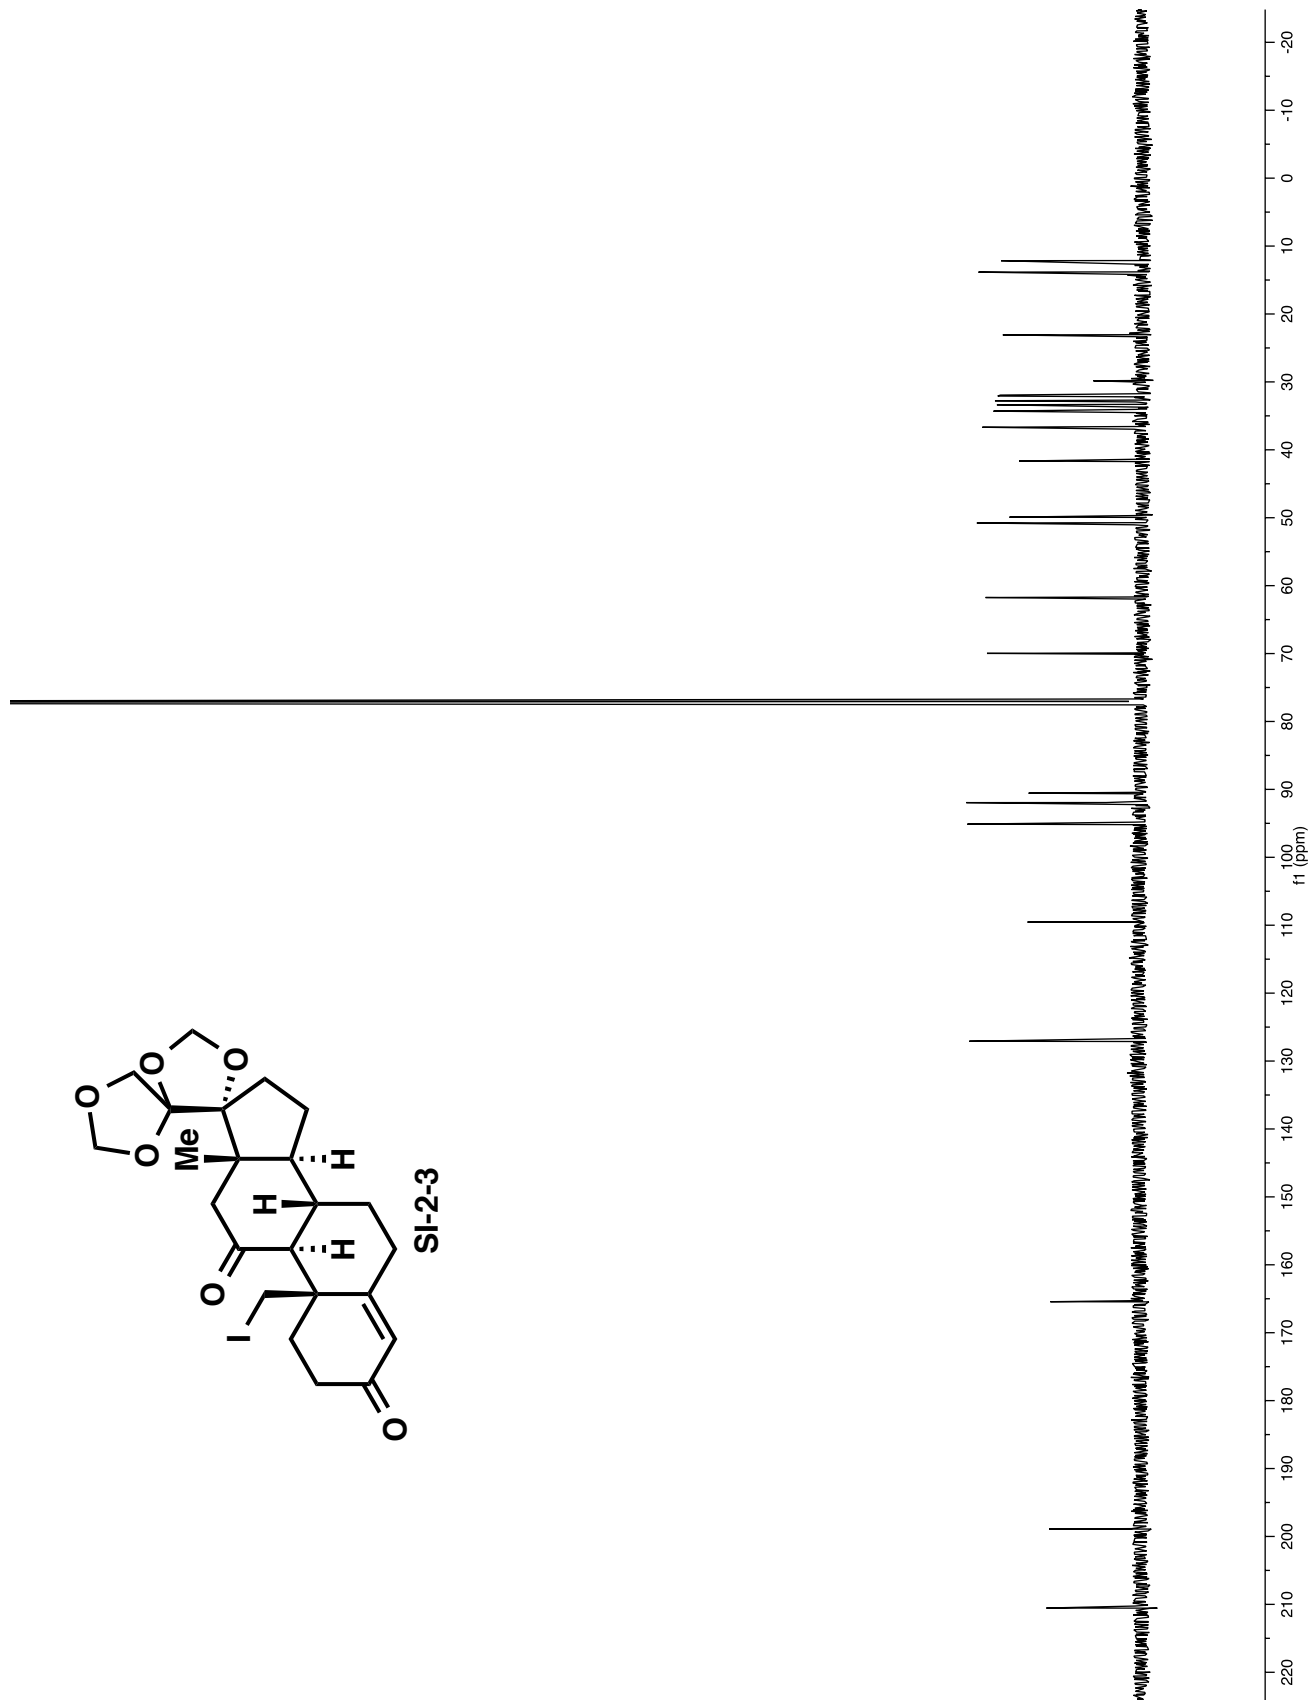

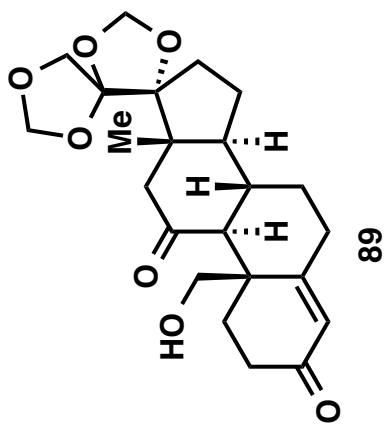

89

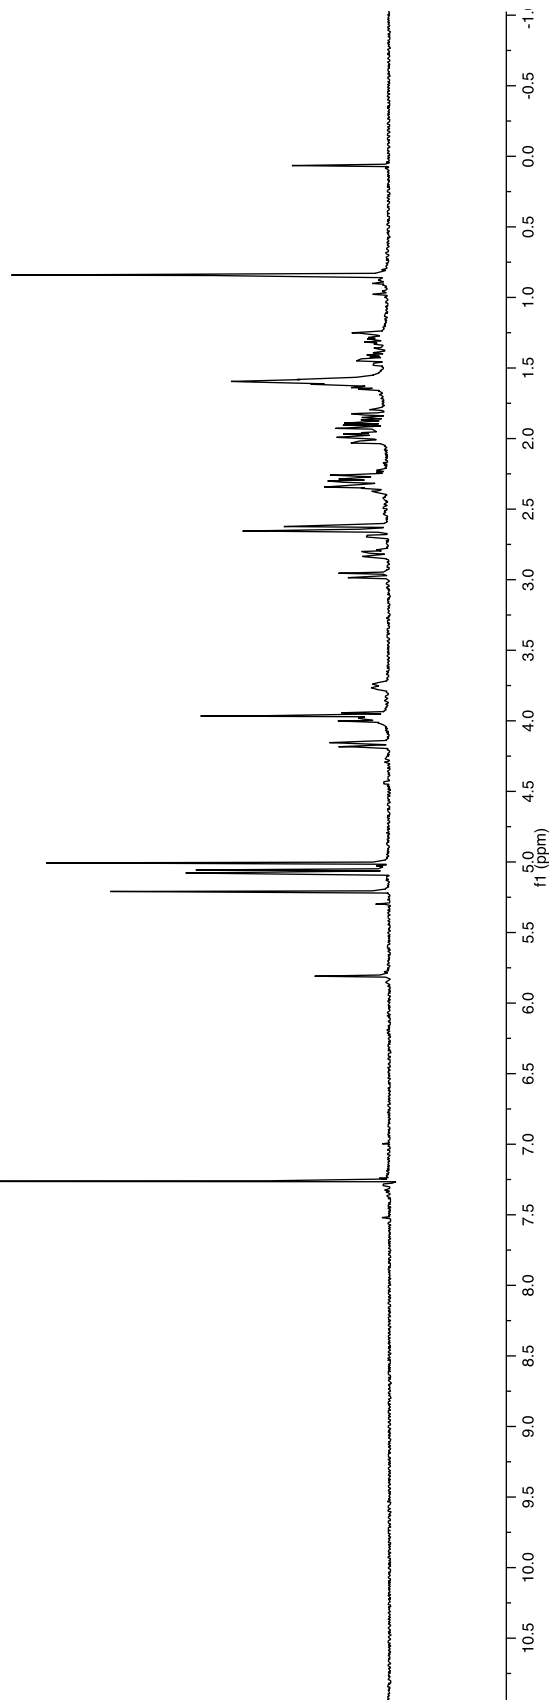

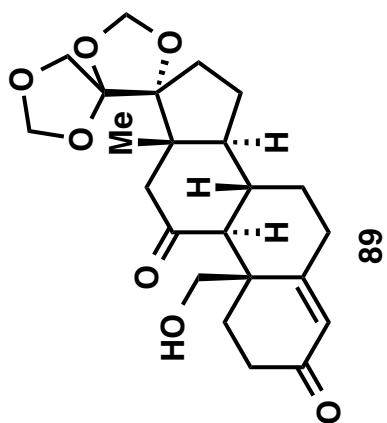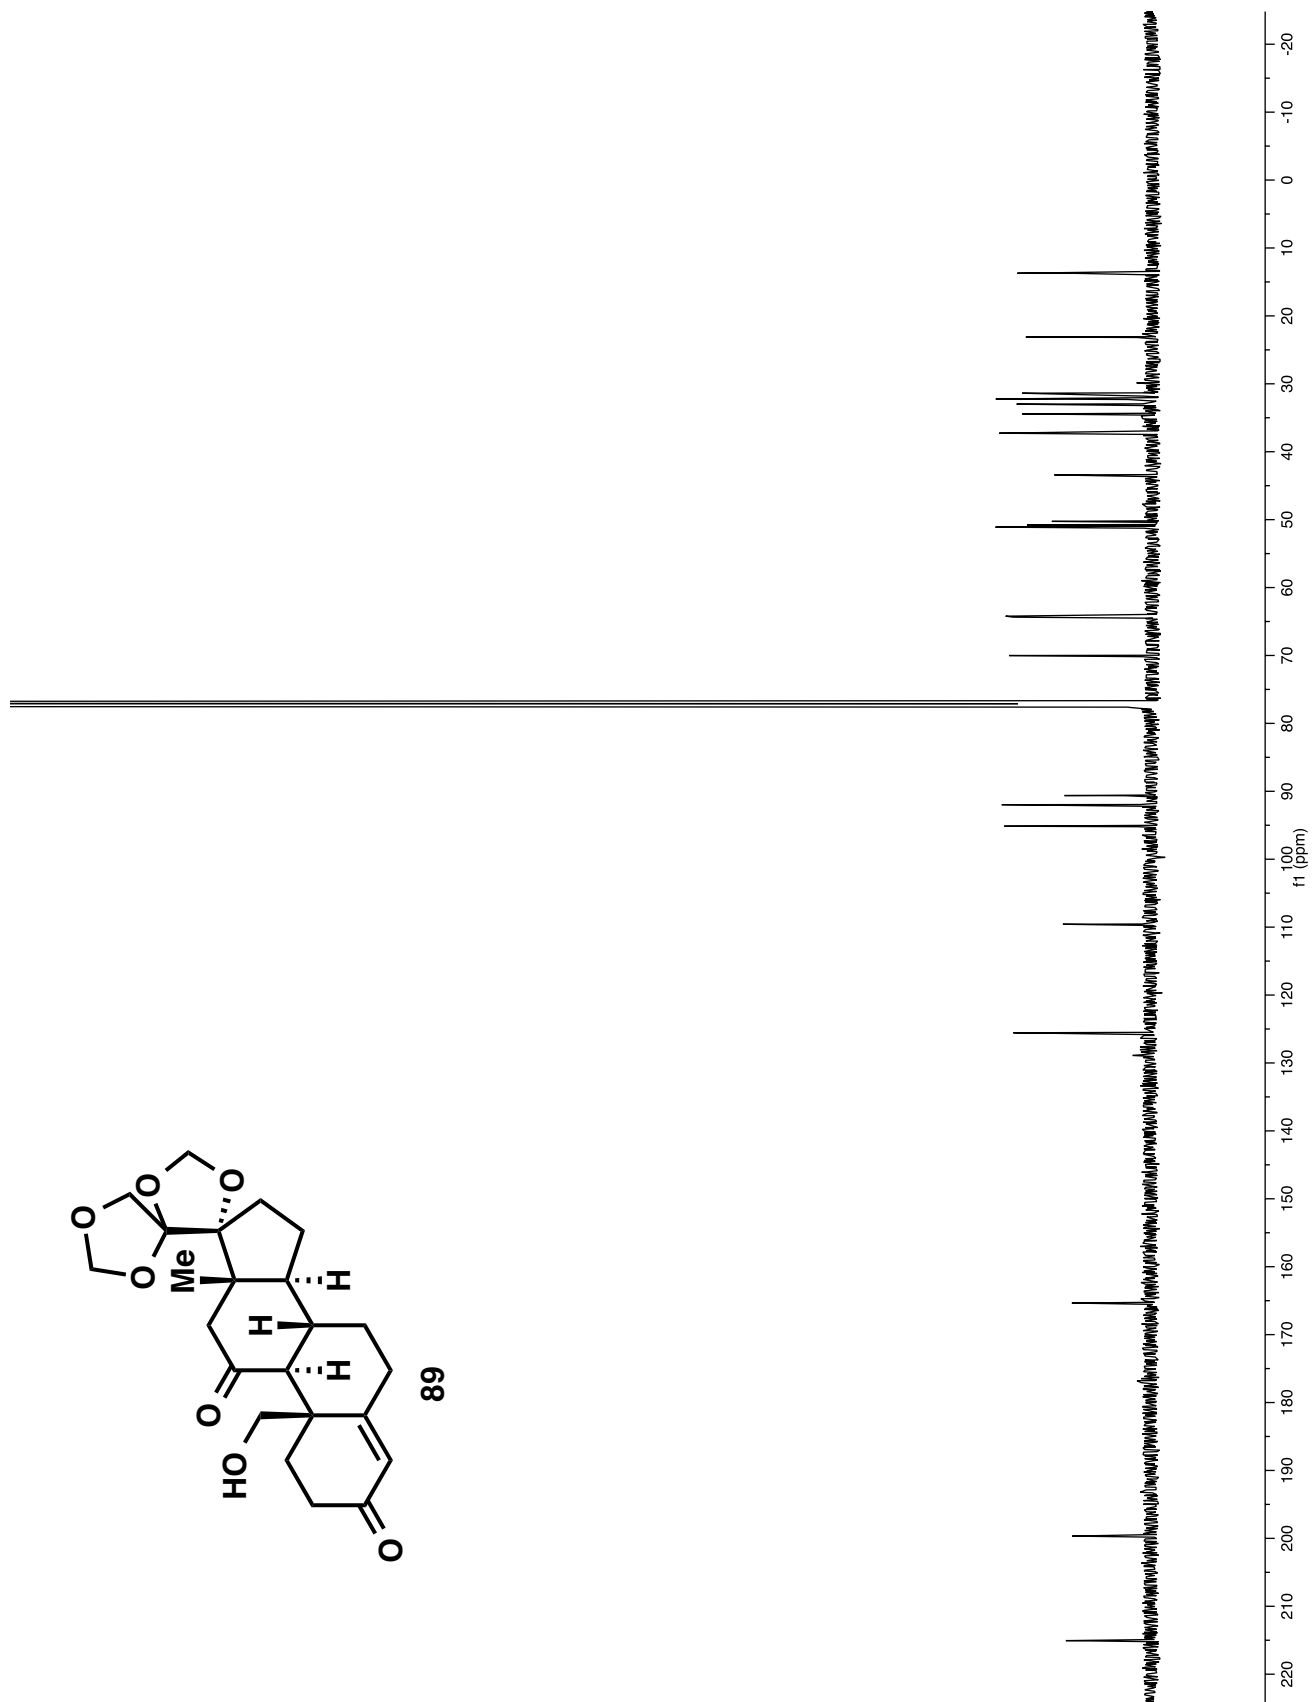

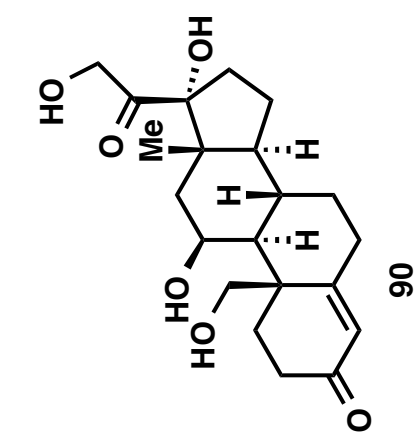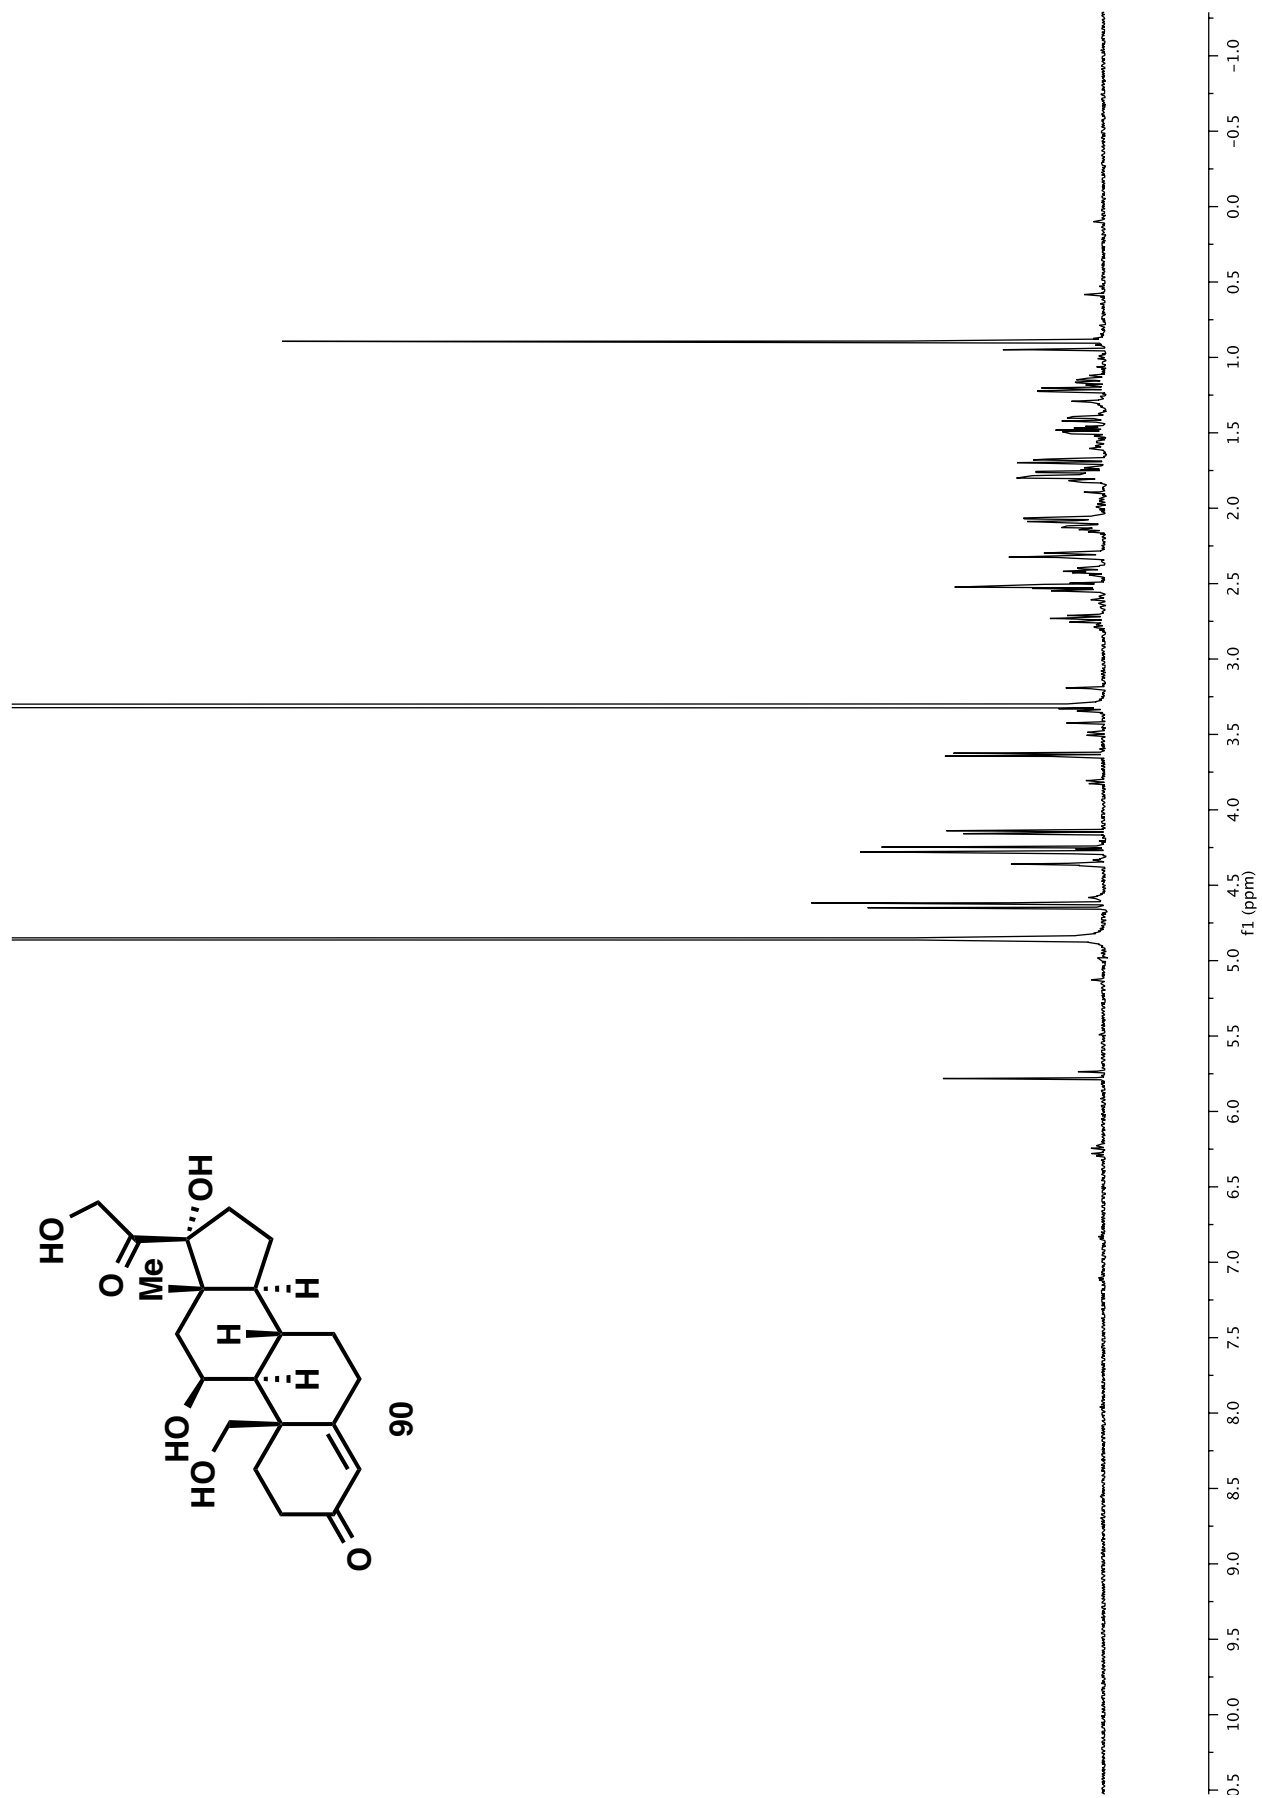

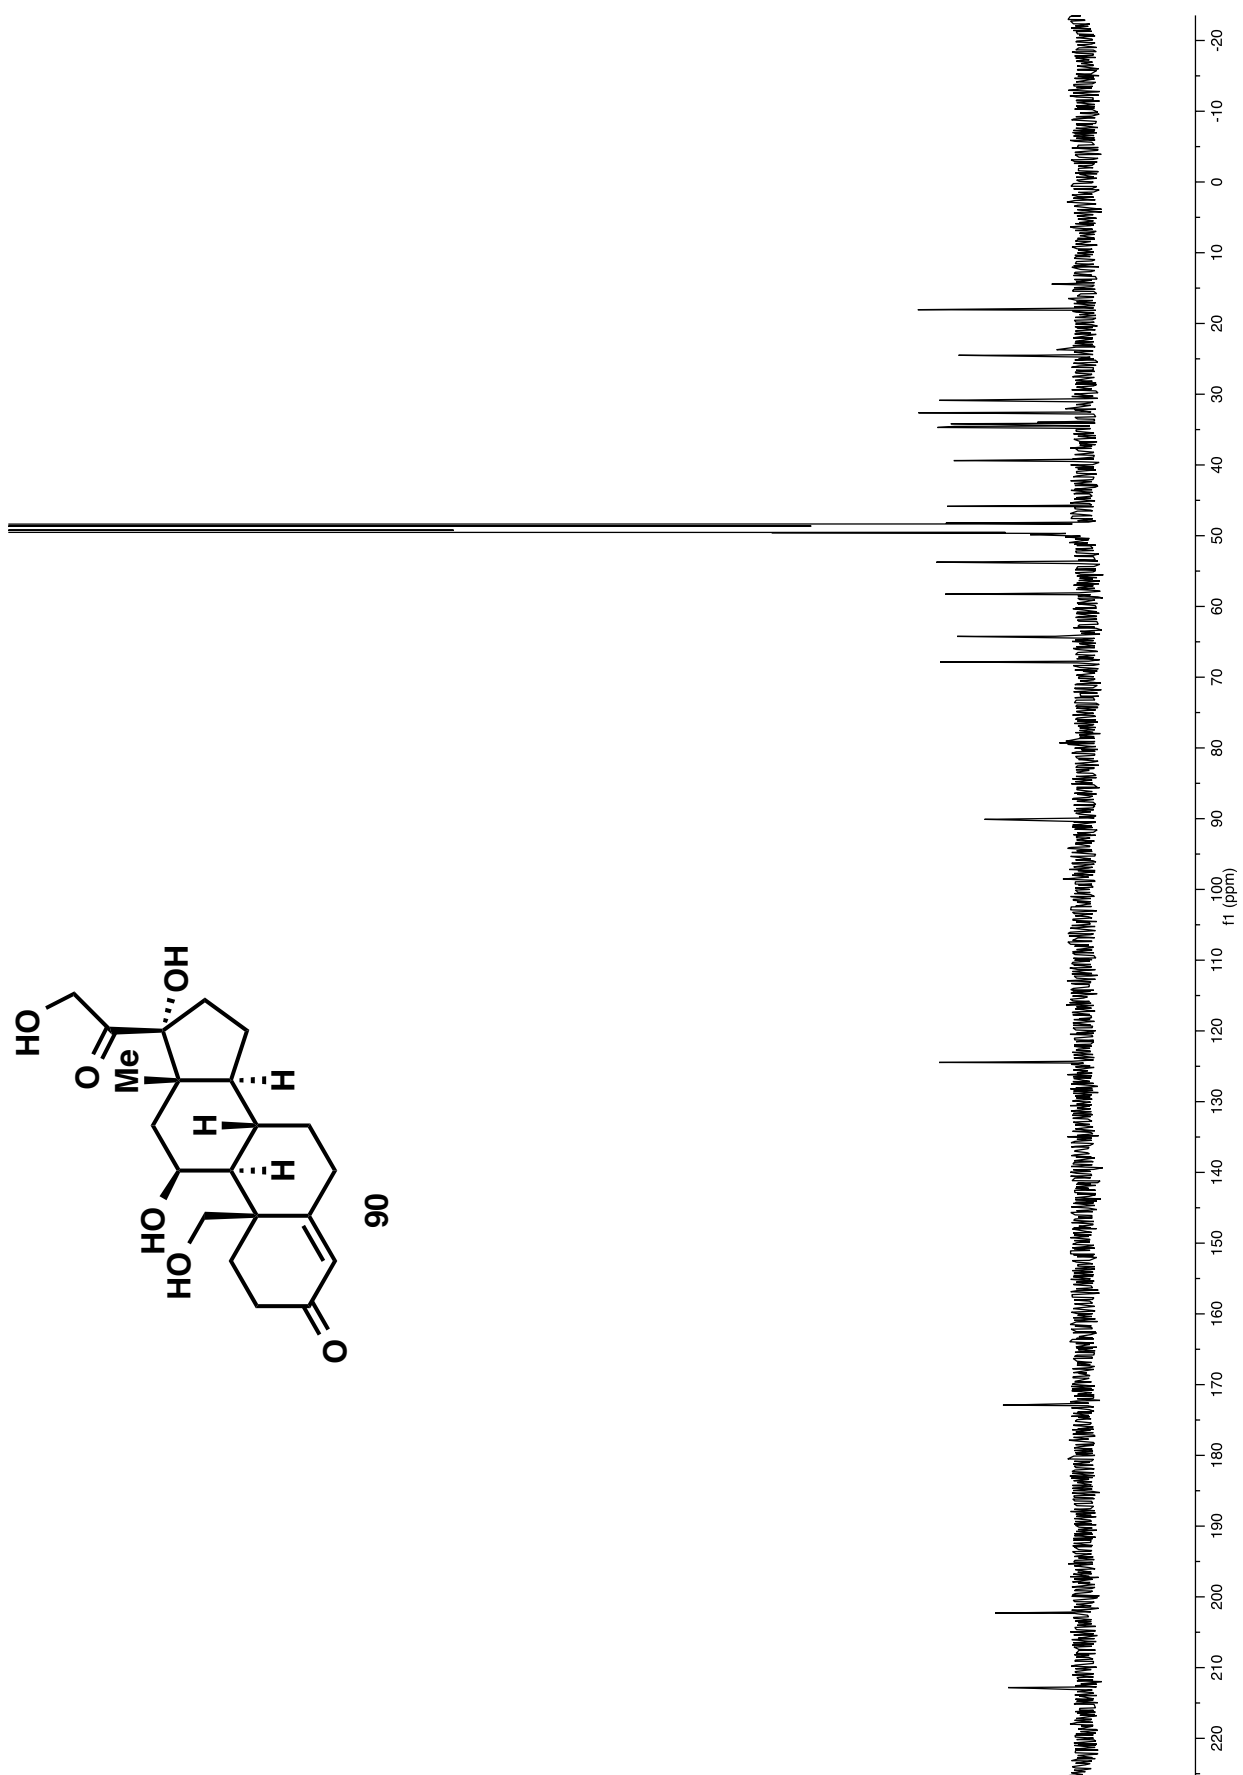

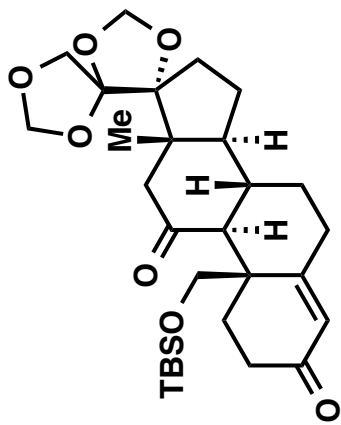

SI-2-3a

SI-94

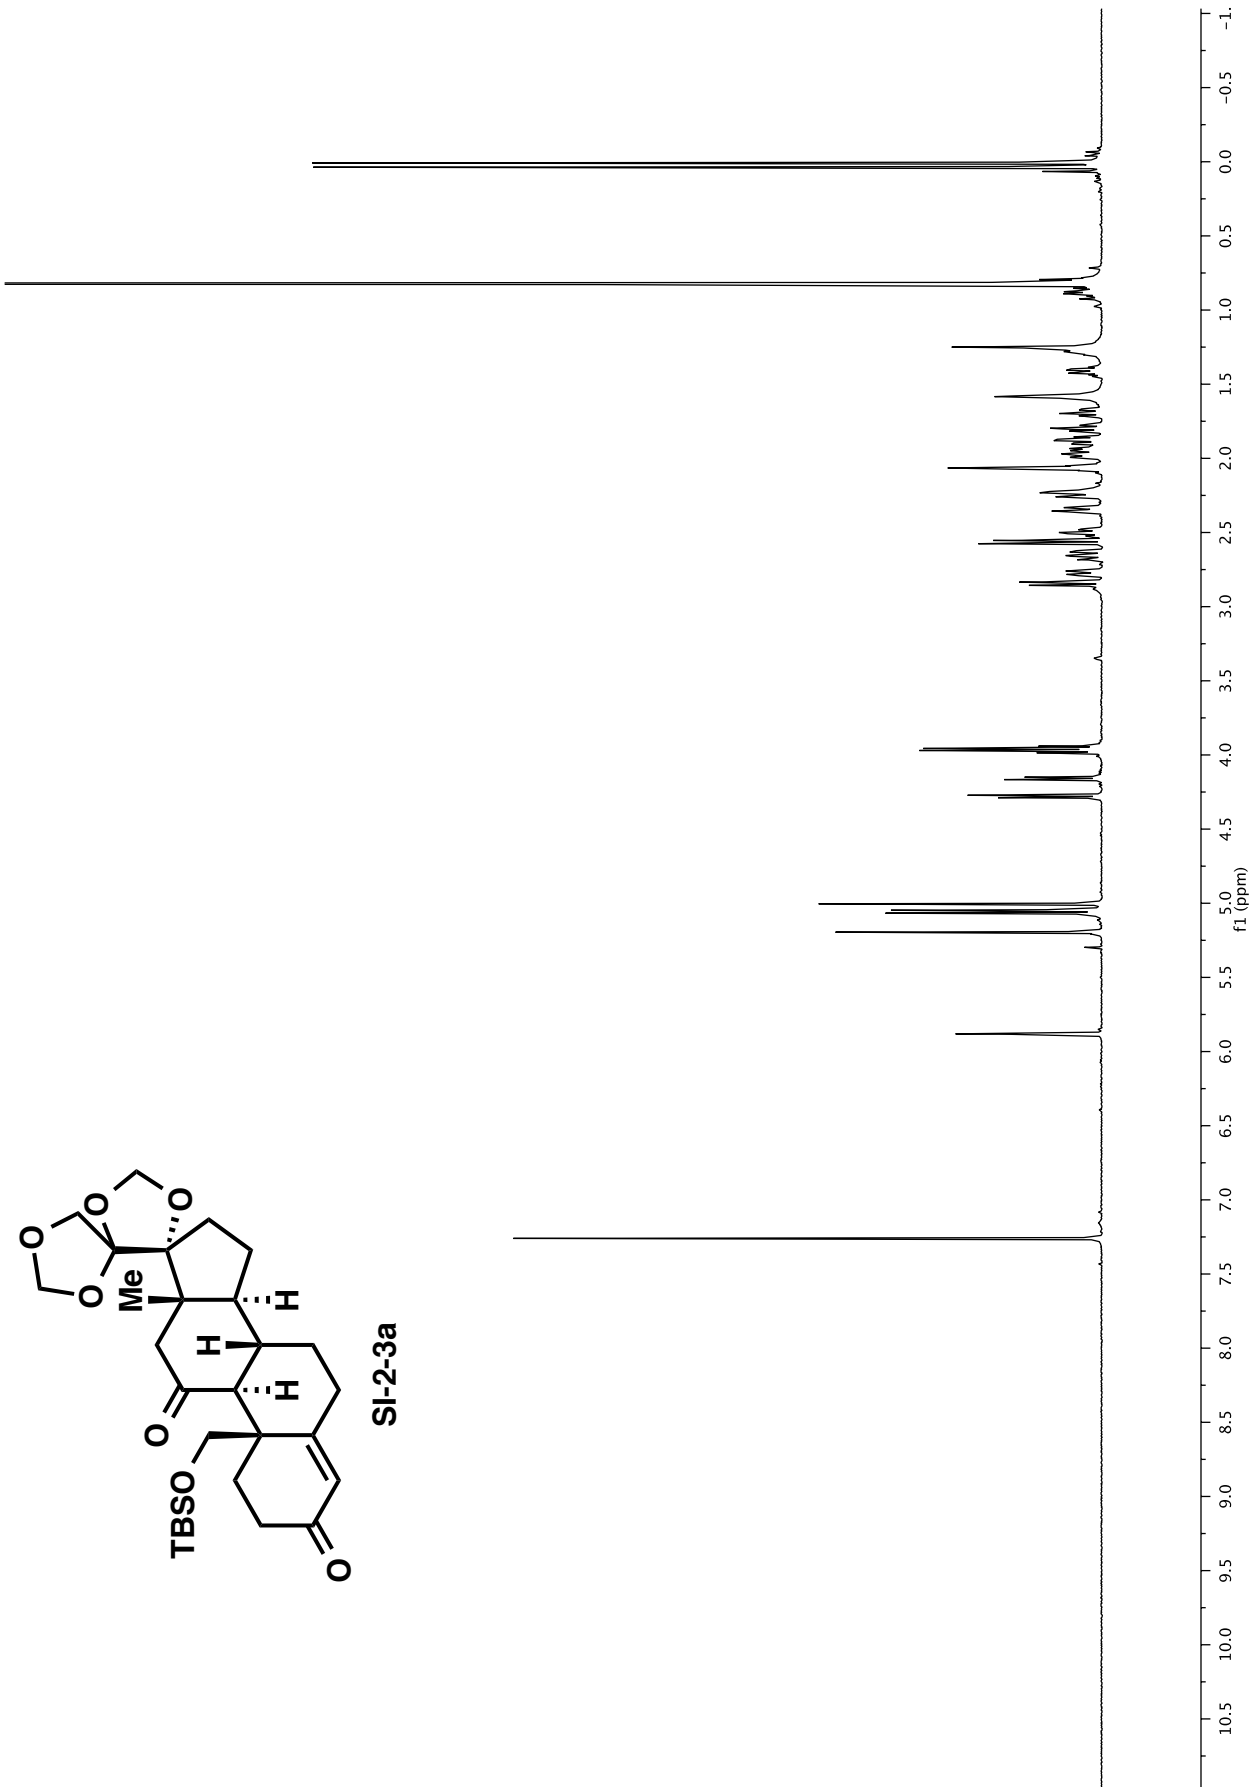

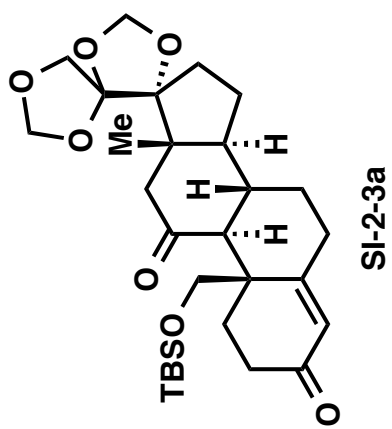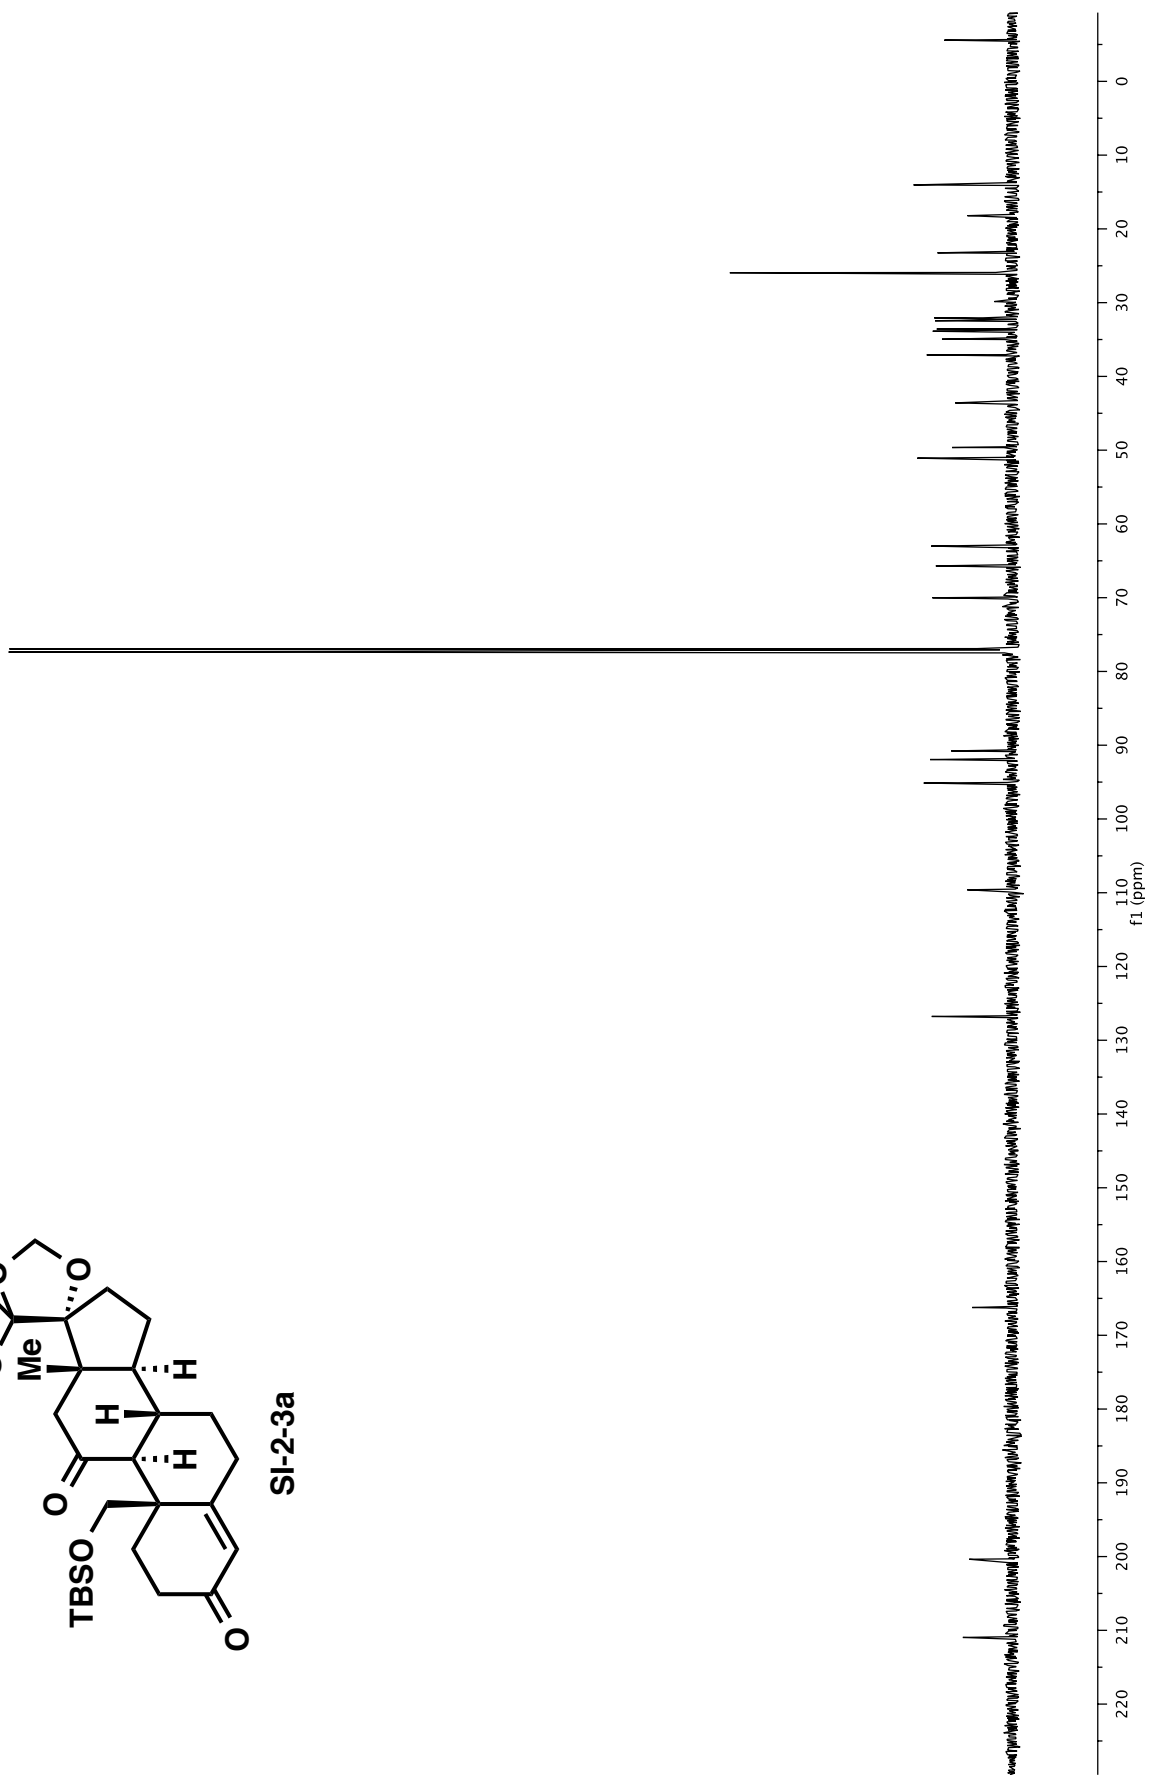

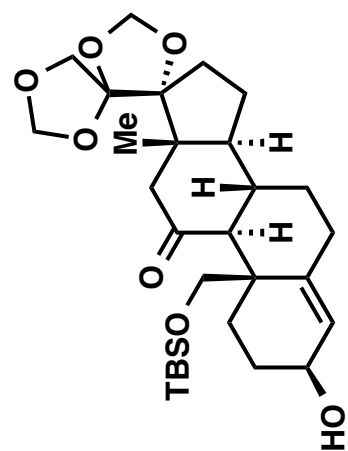

SI-2-3b

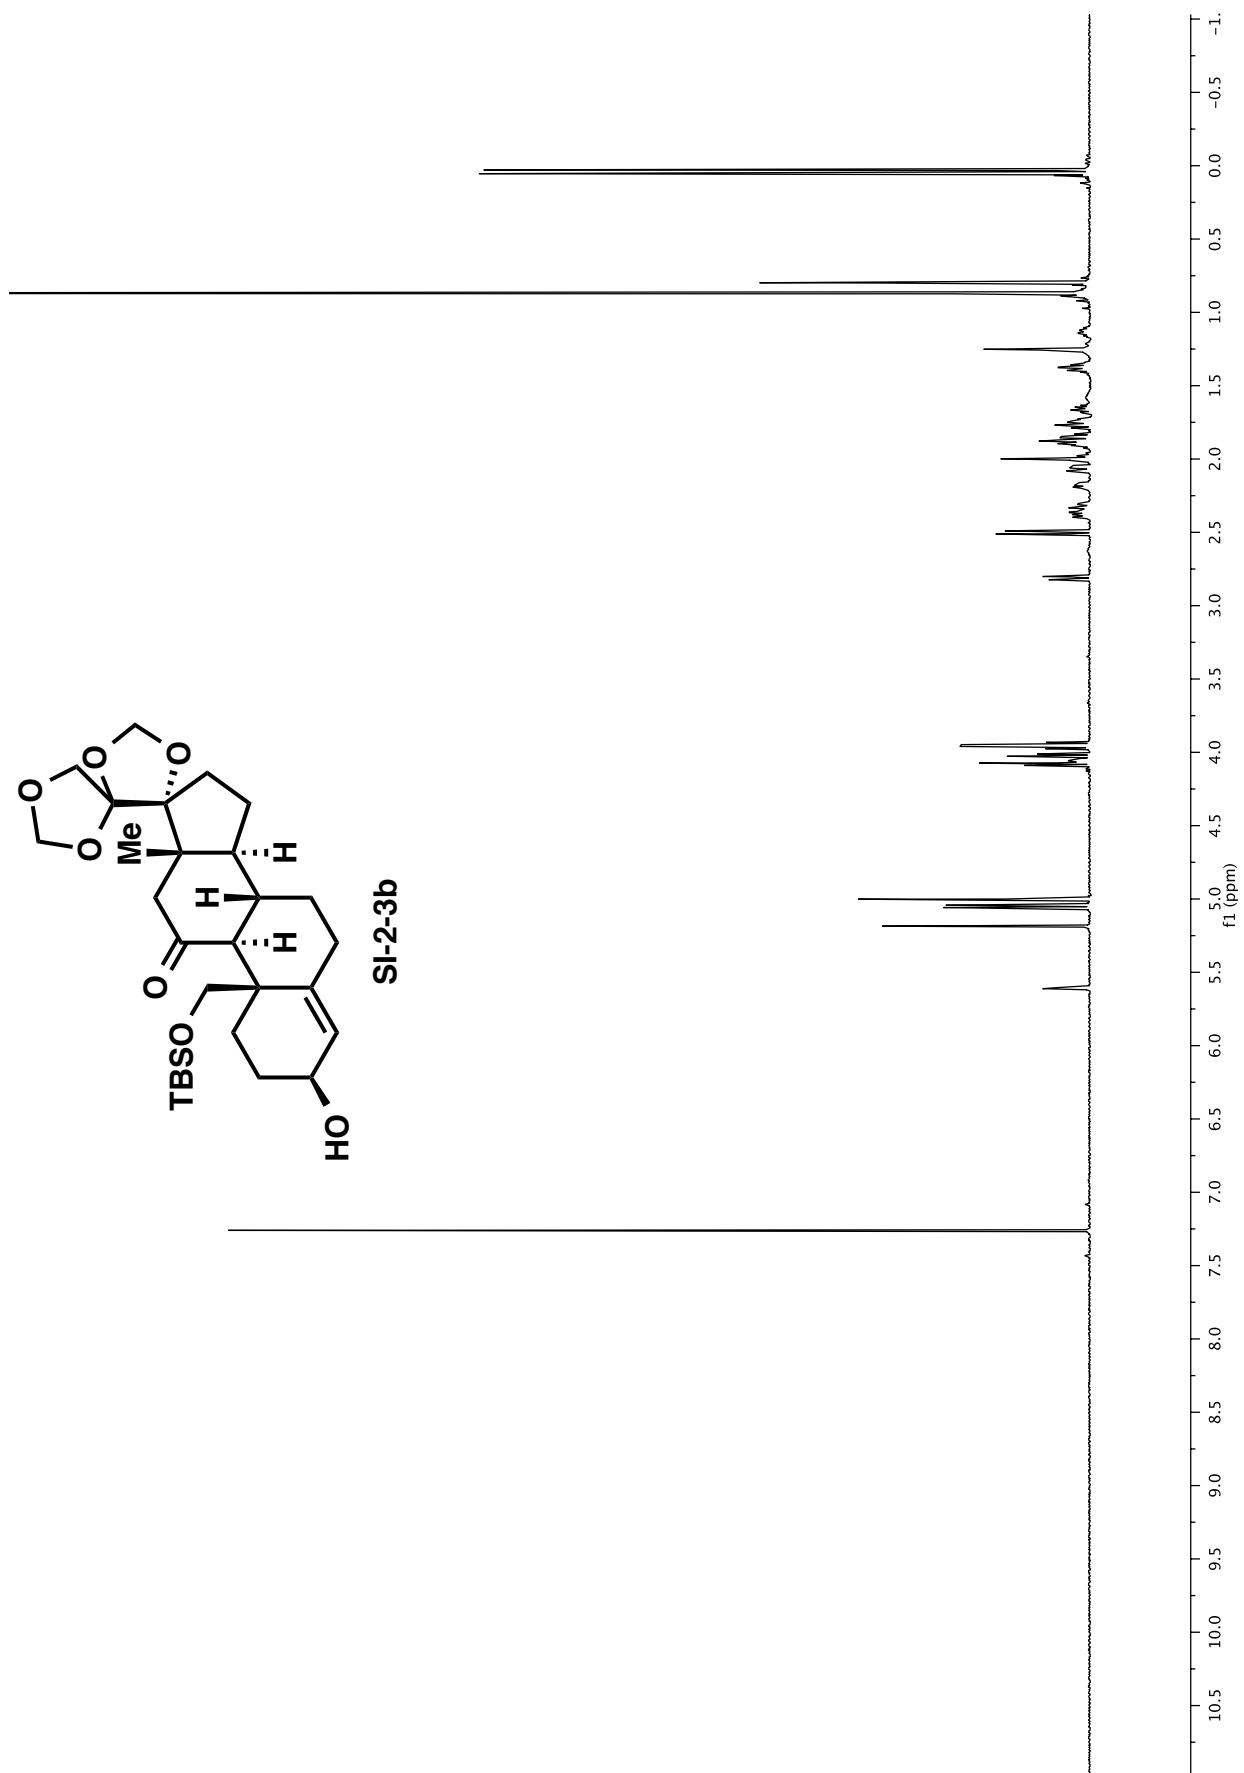



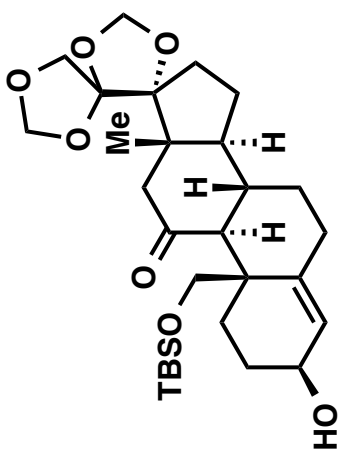

SI-2-3b

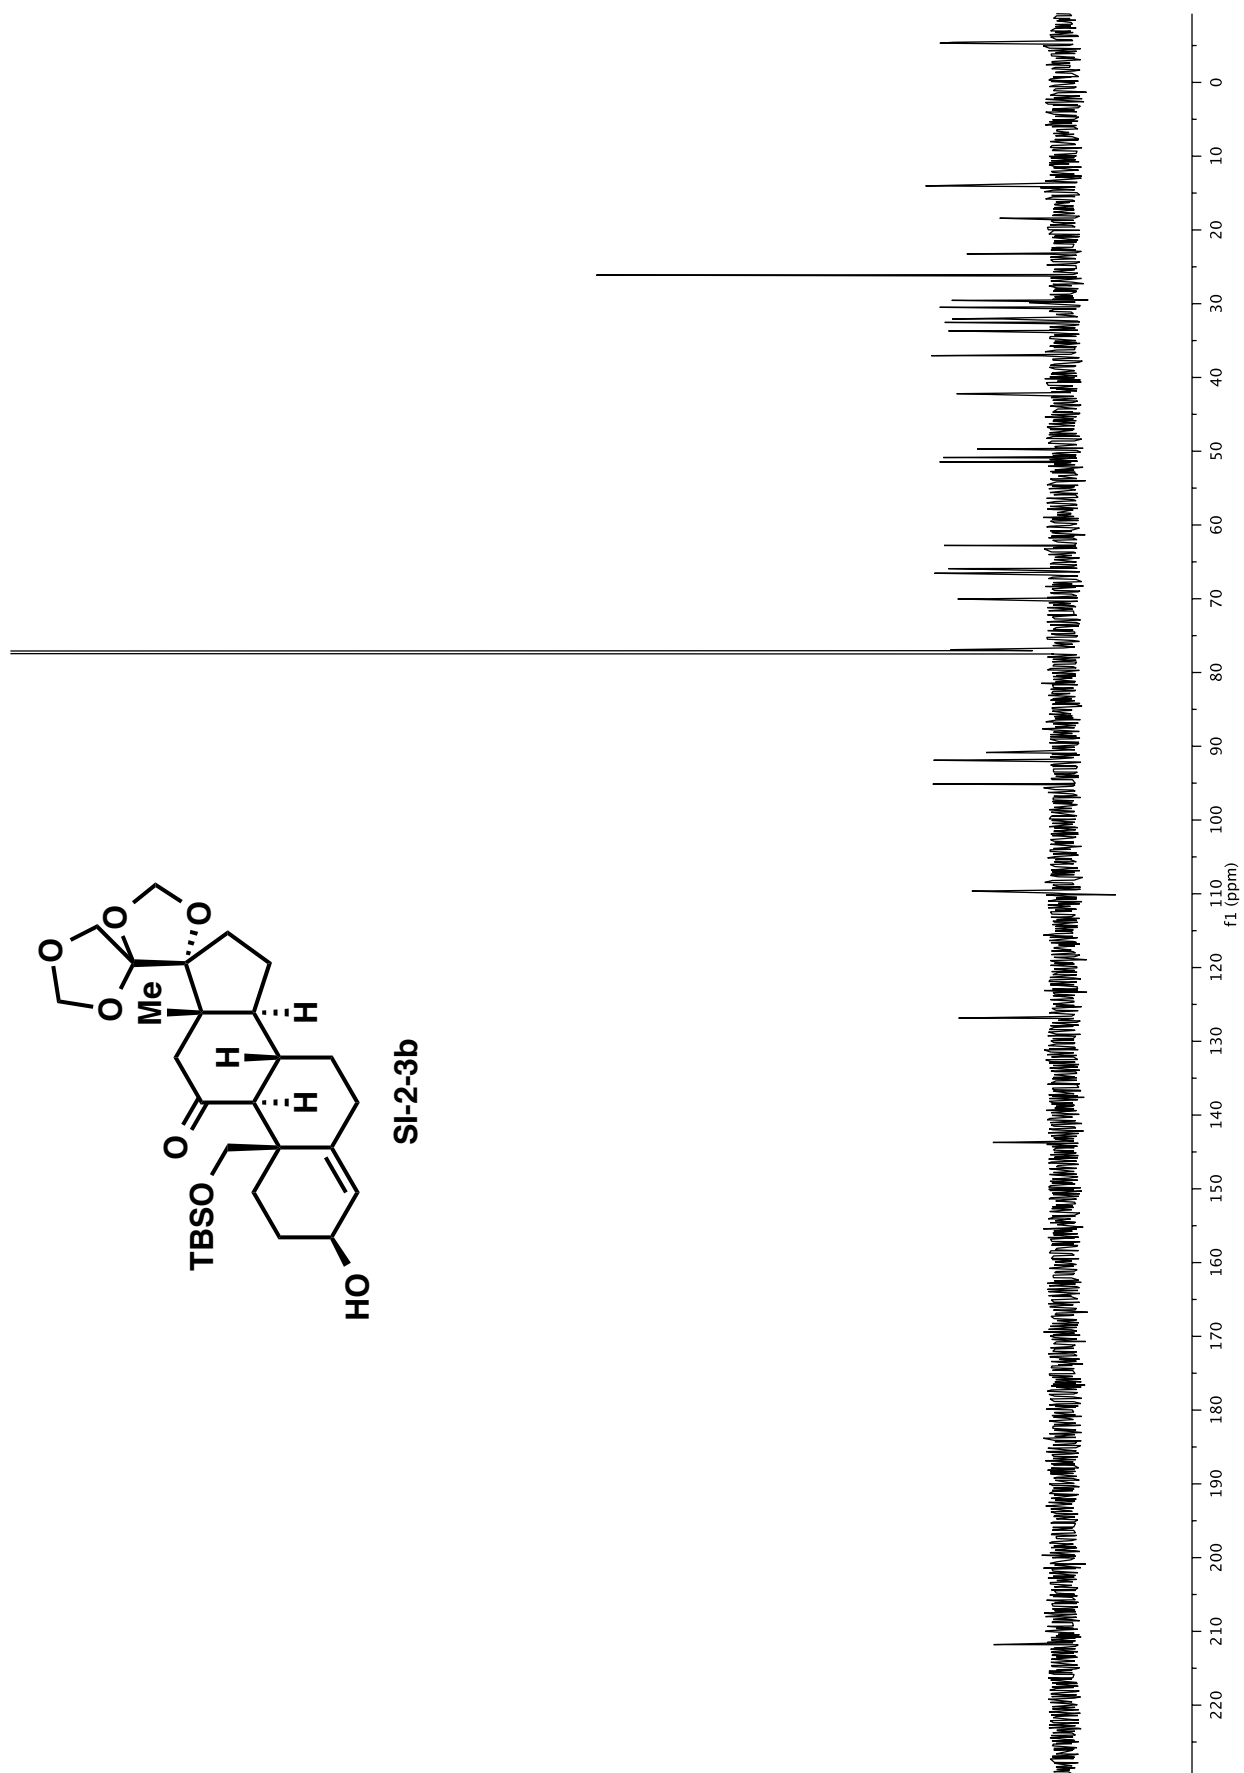

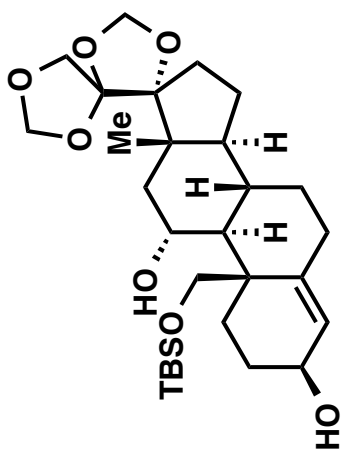

SI-2-4

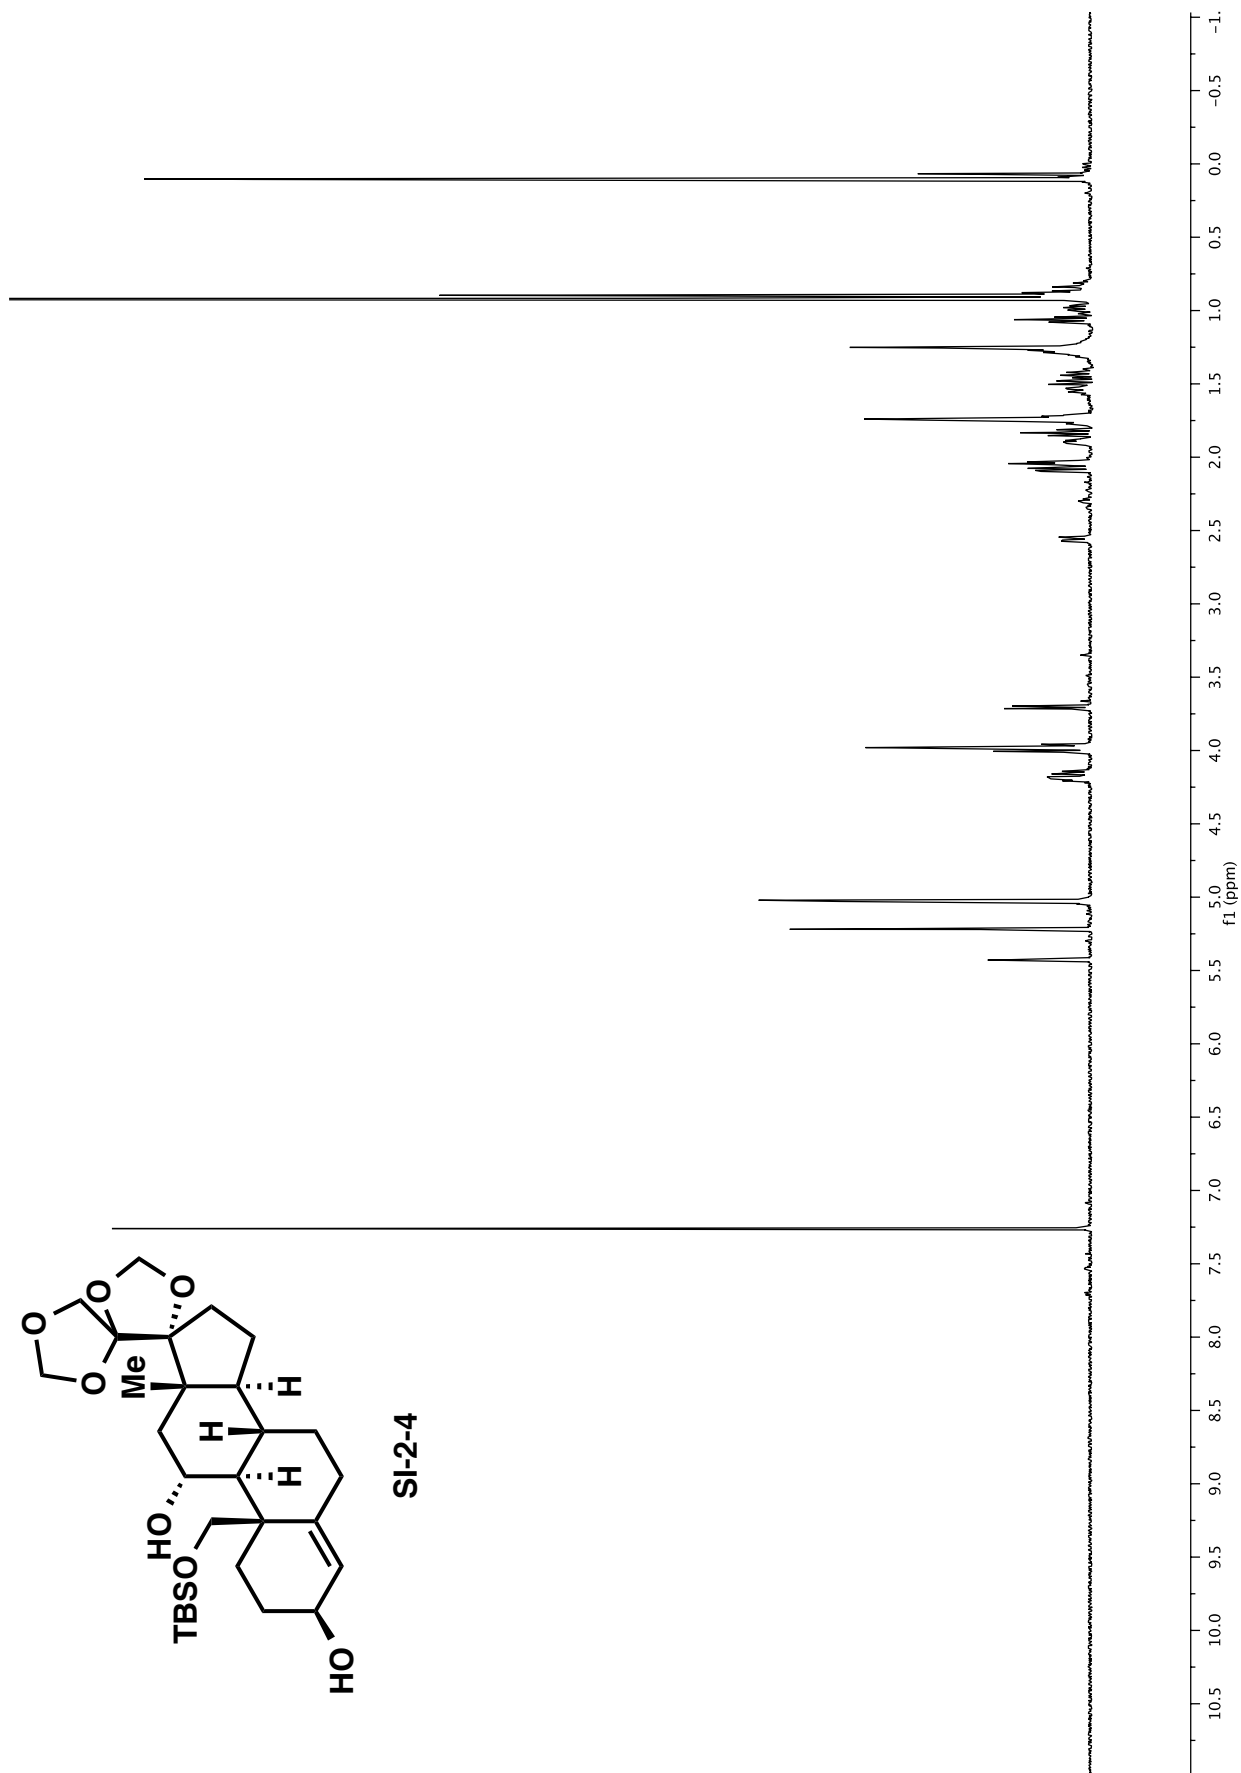

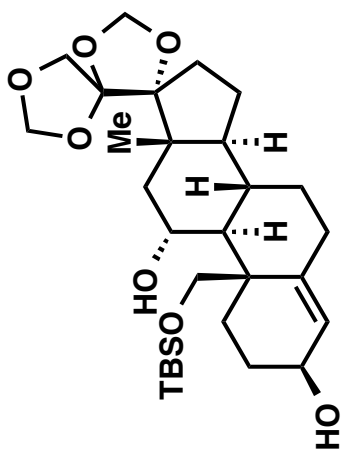

SI-2-4

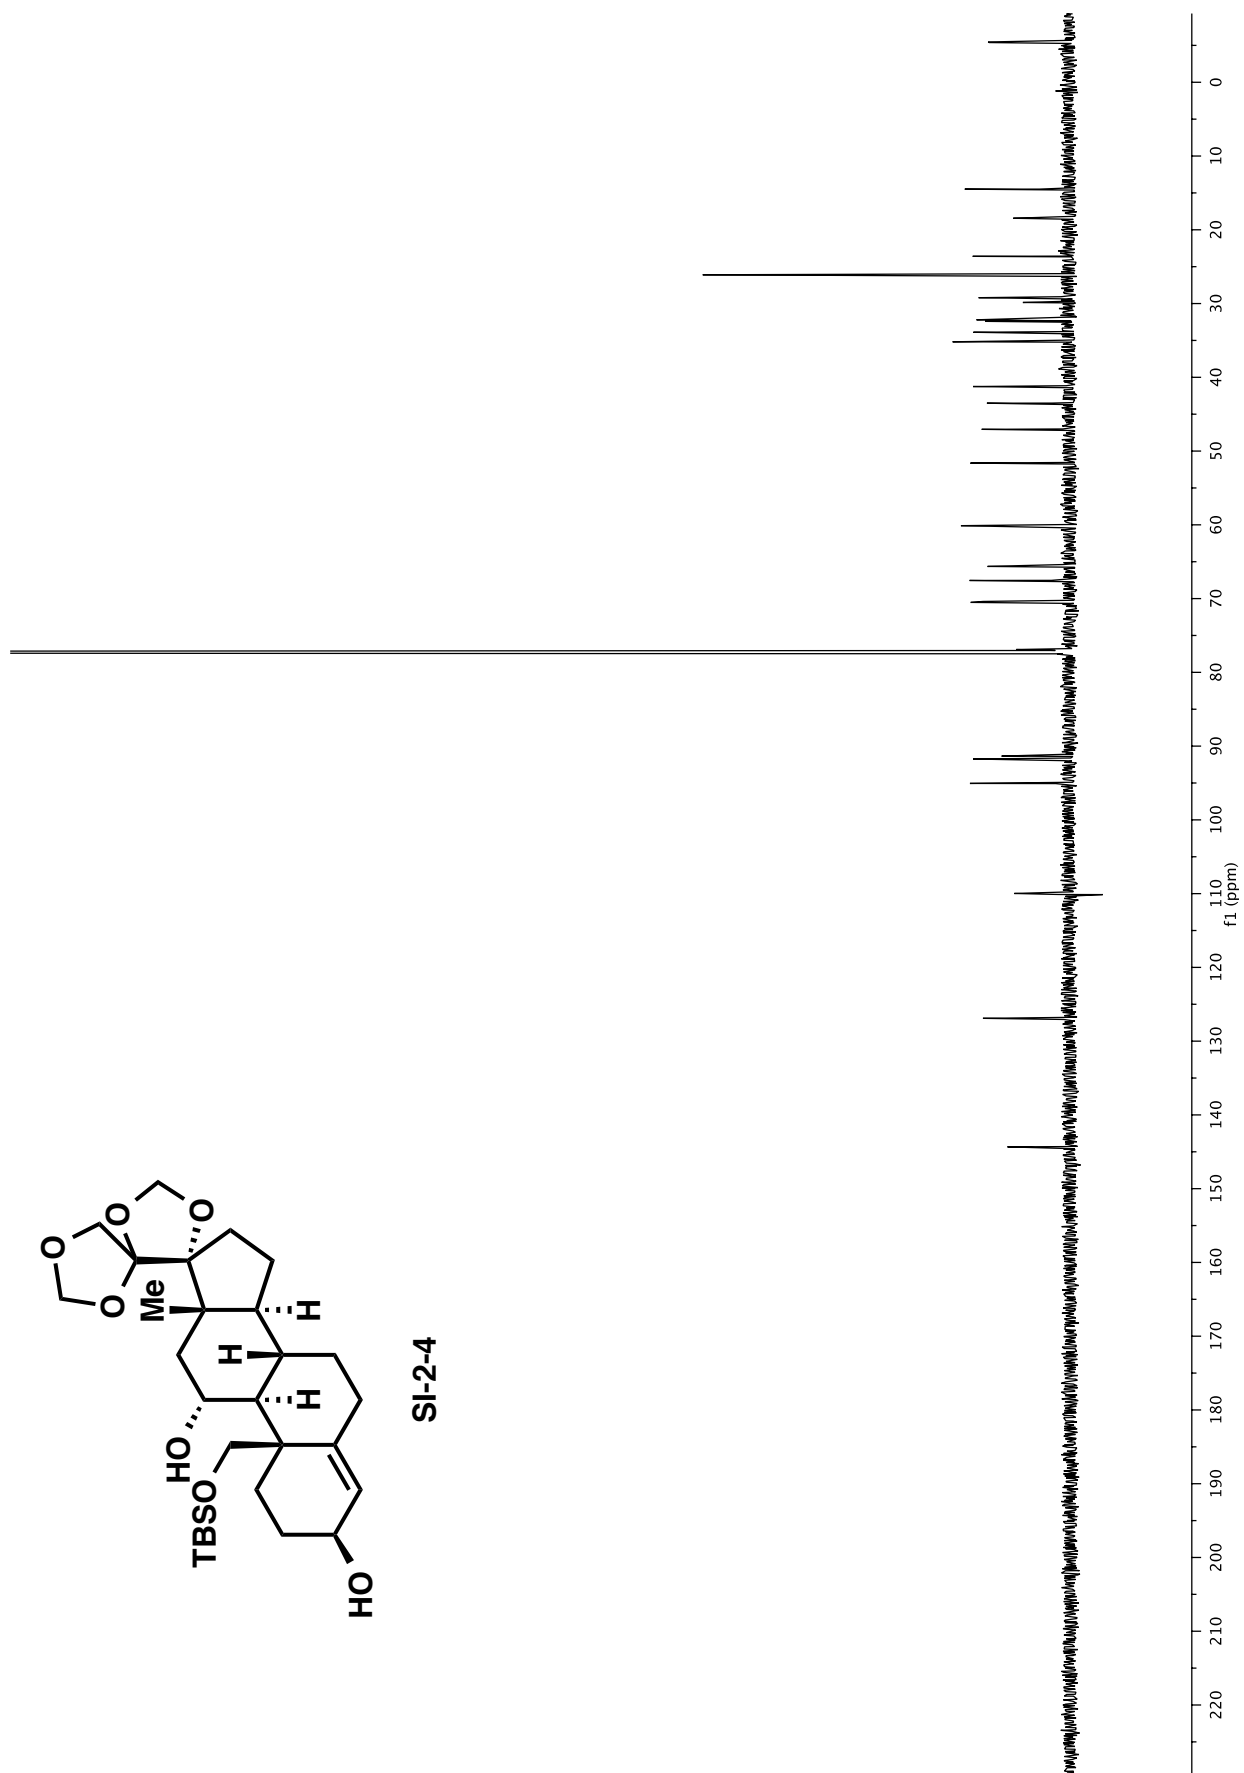

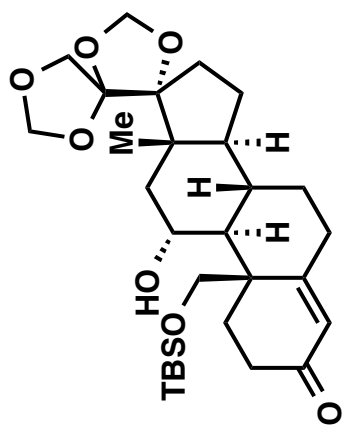

SI-2-5

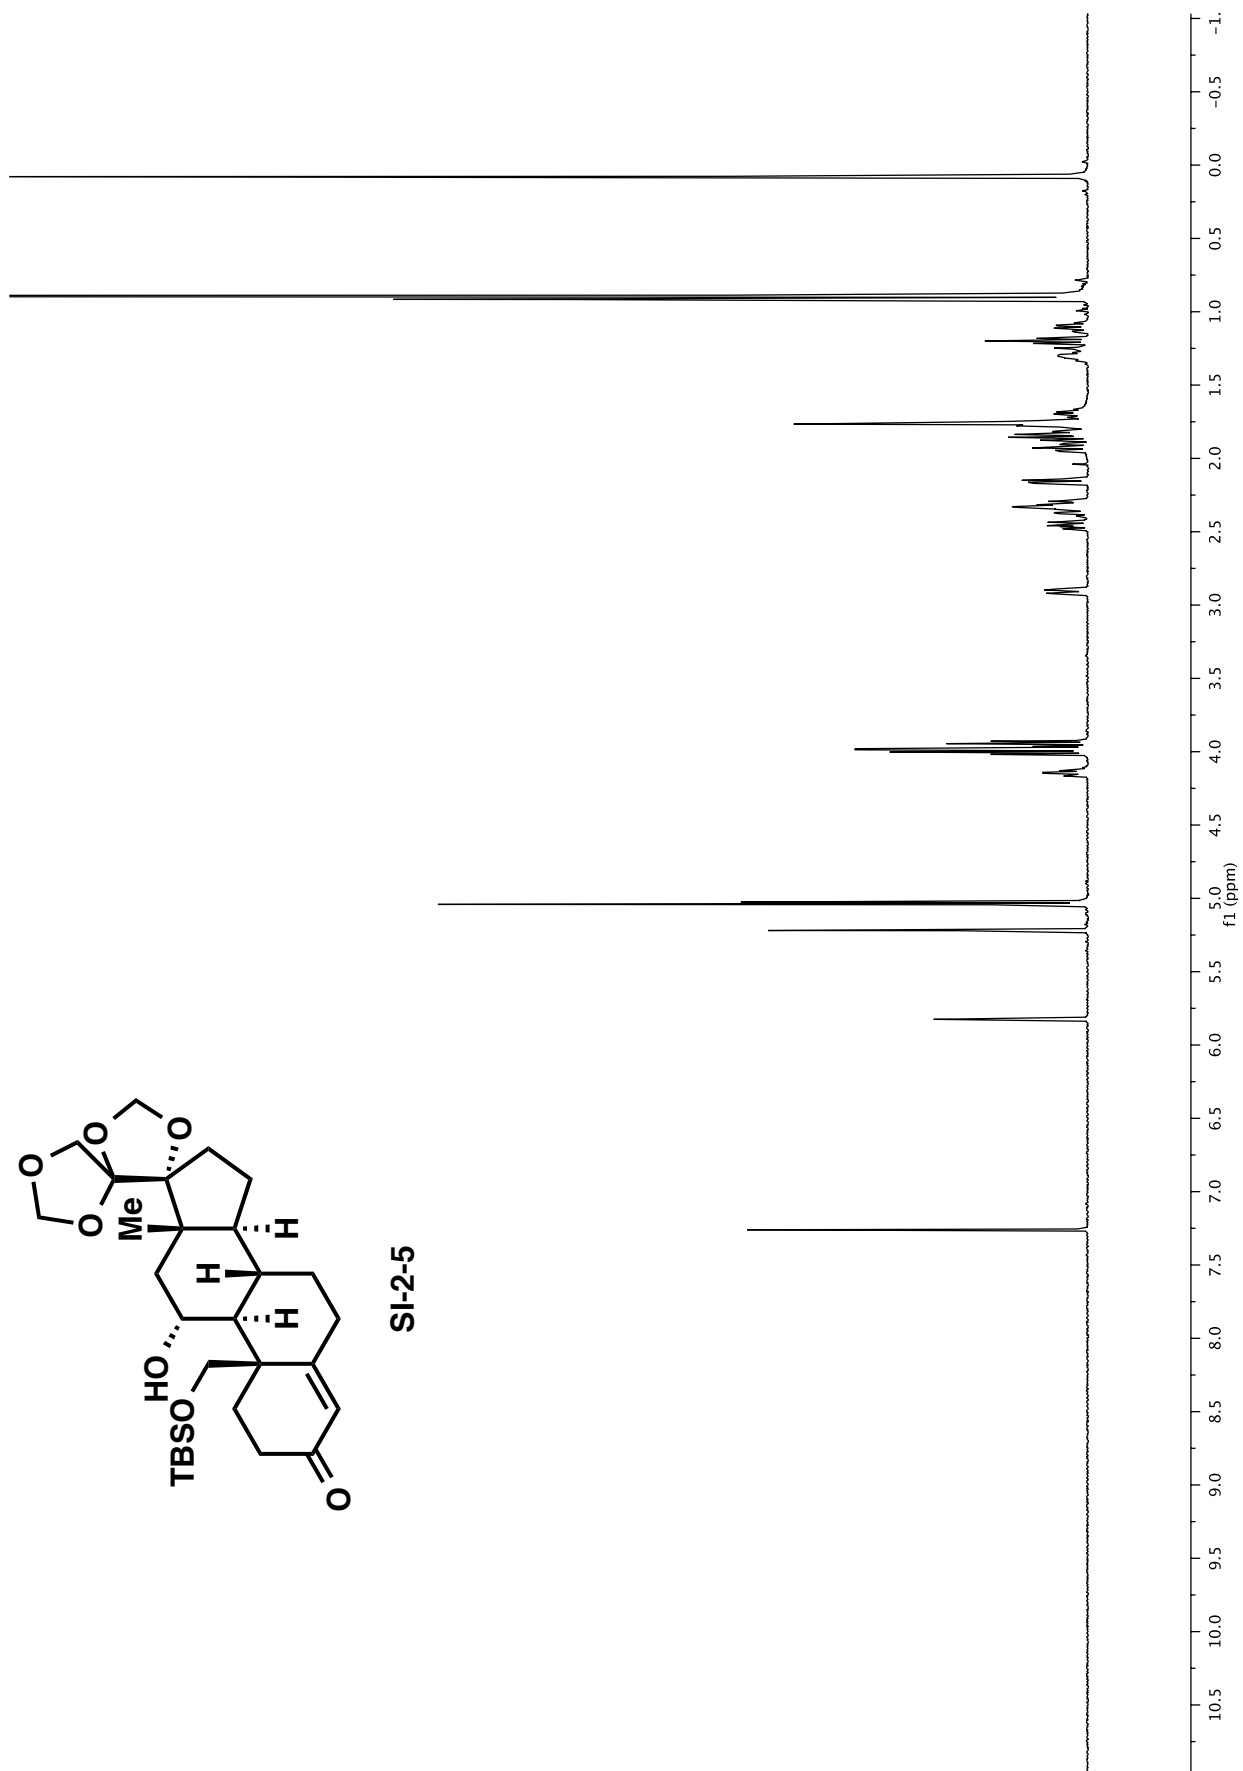

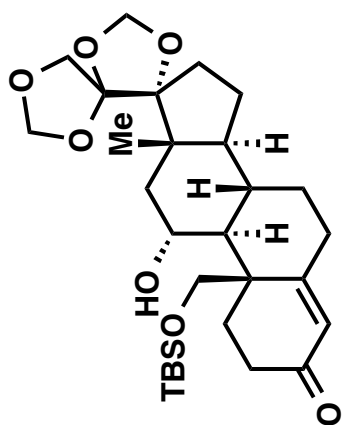

SI-2-5

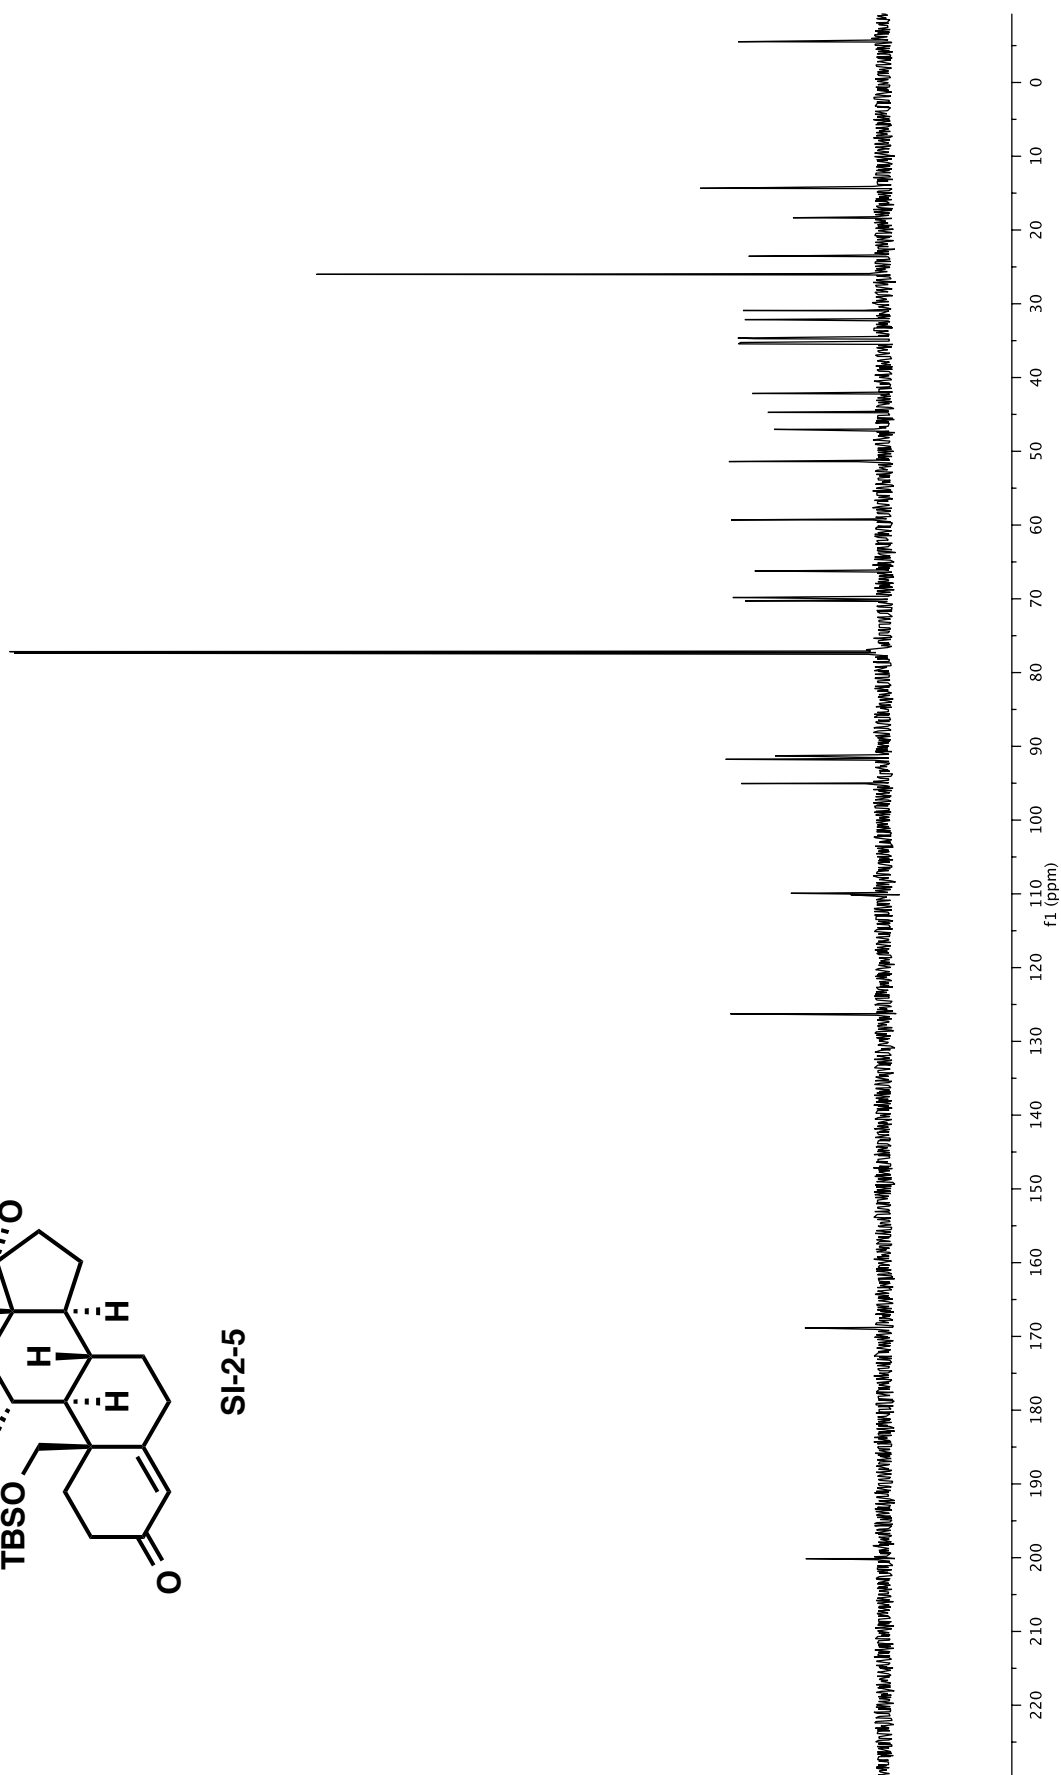

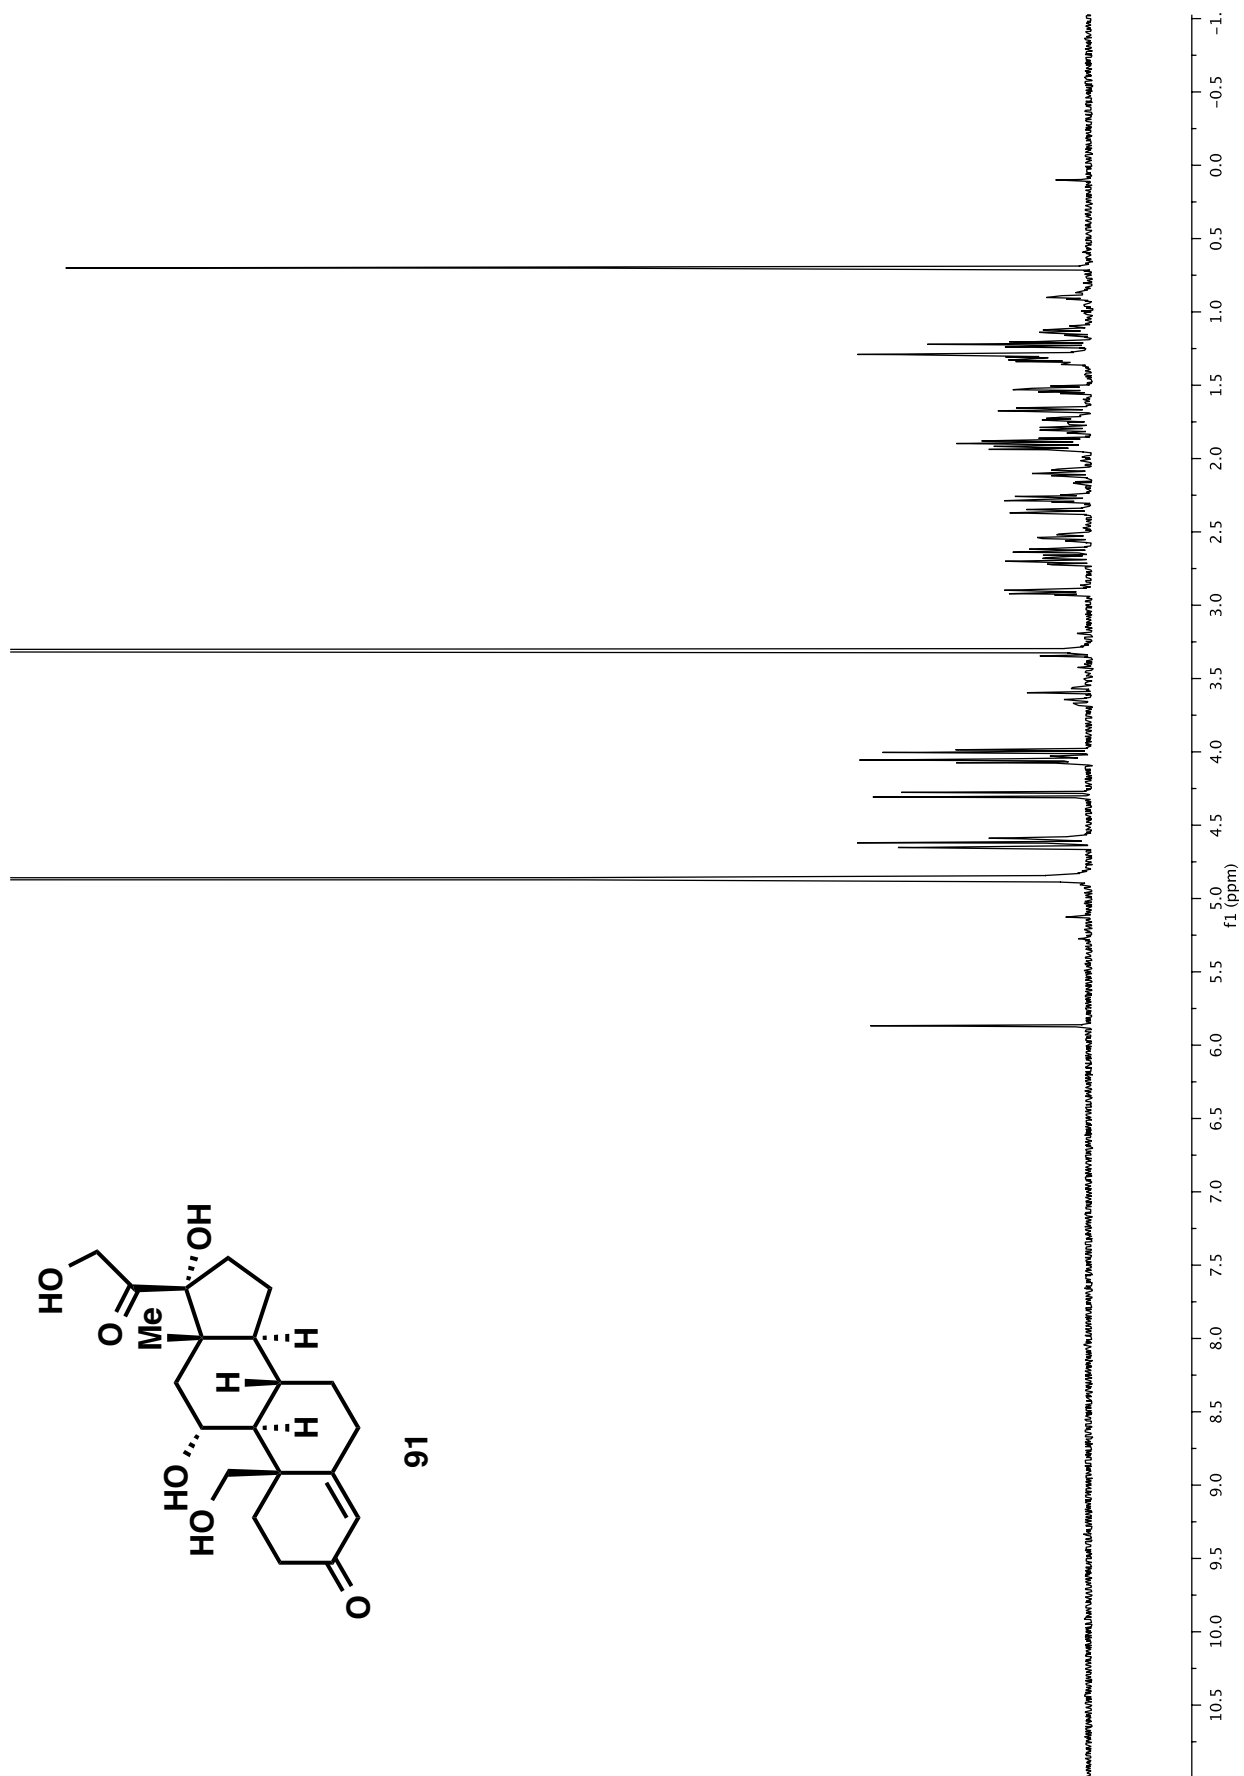

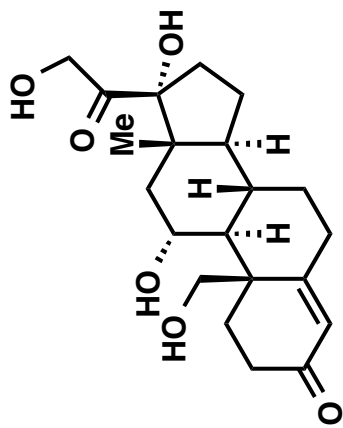

91

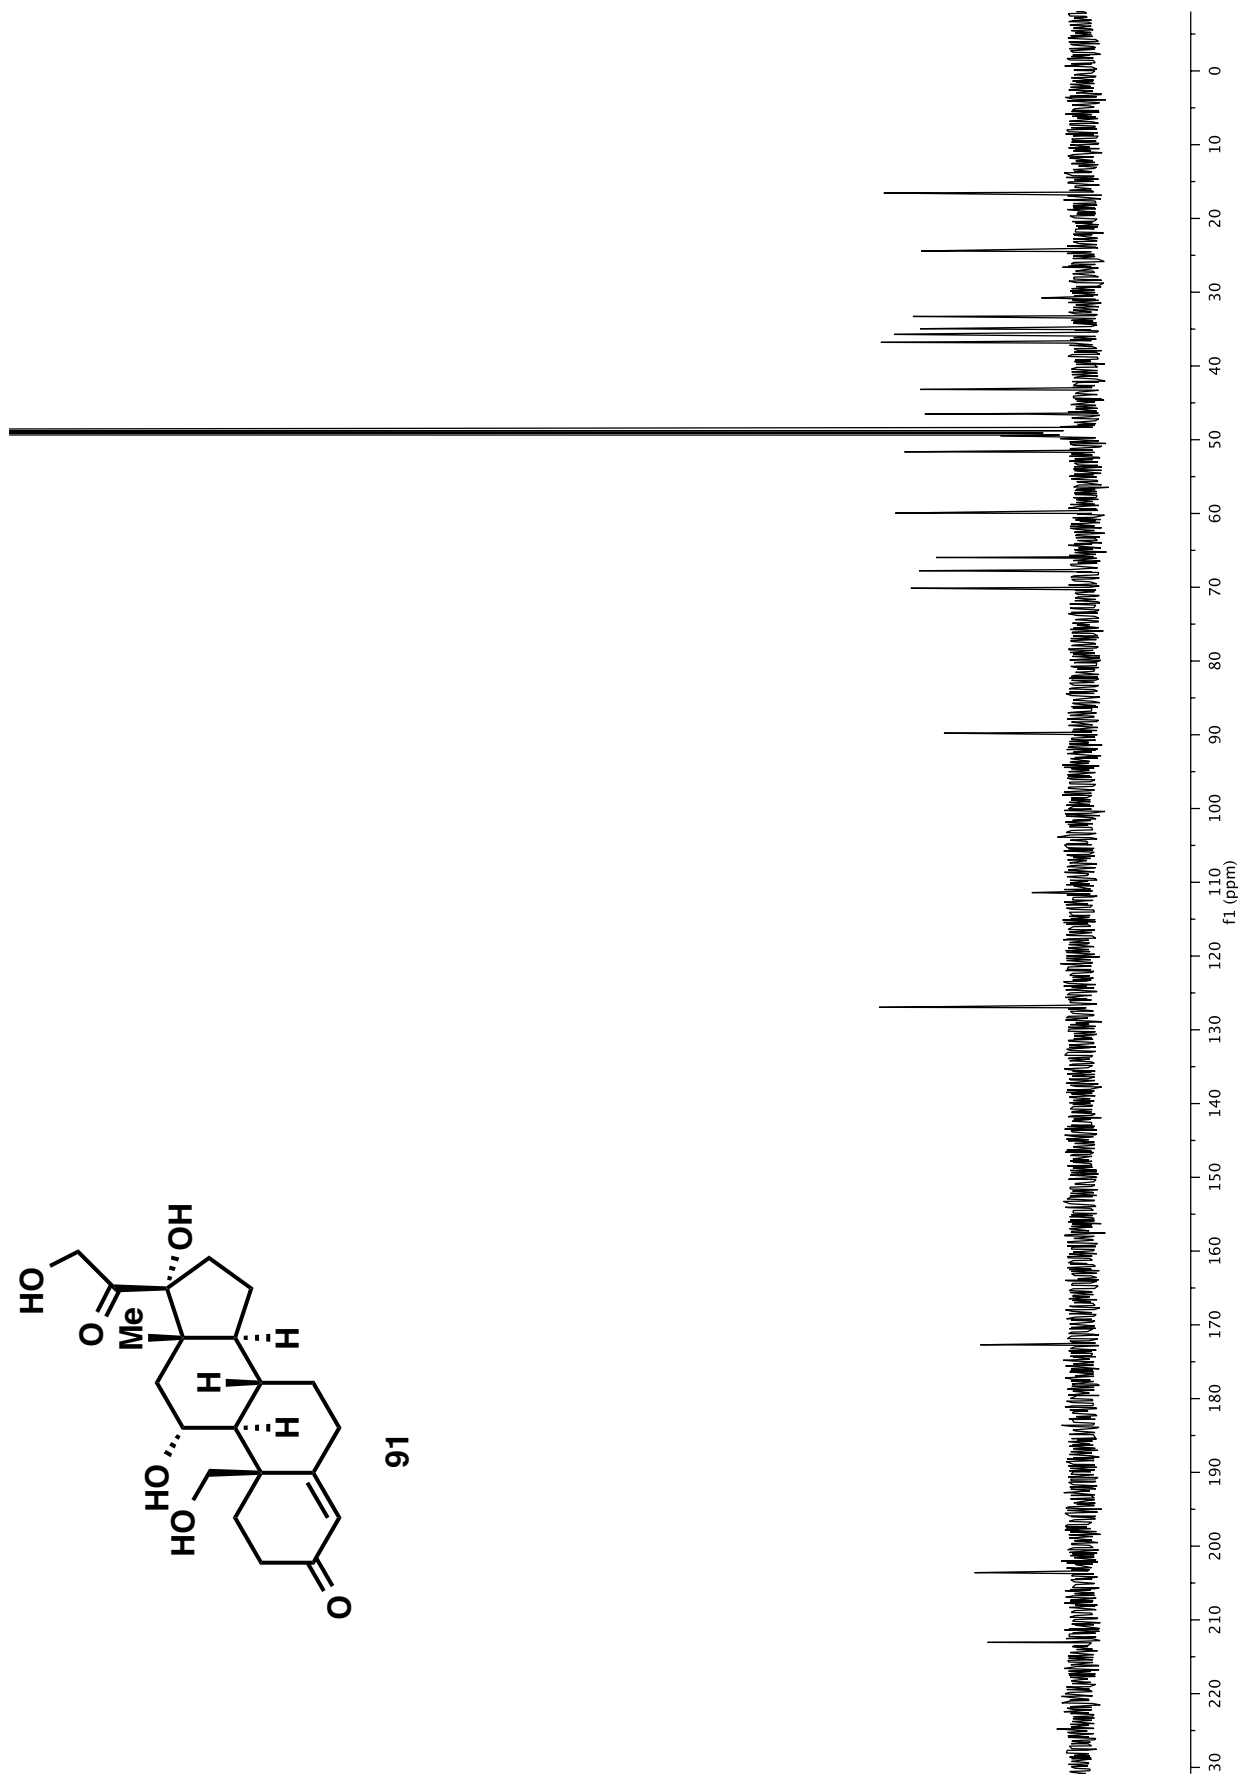

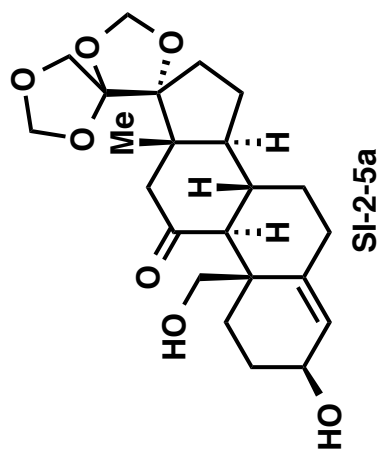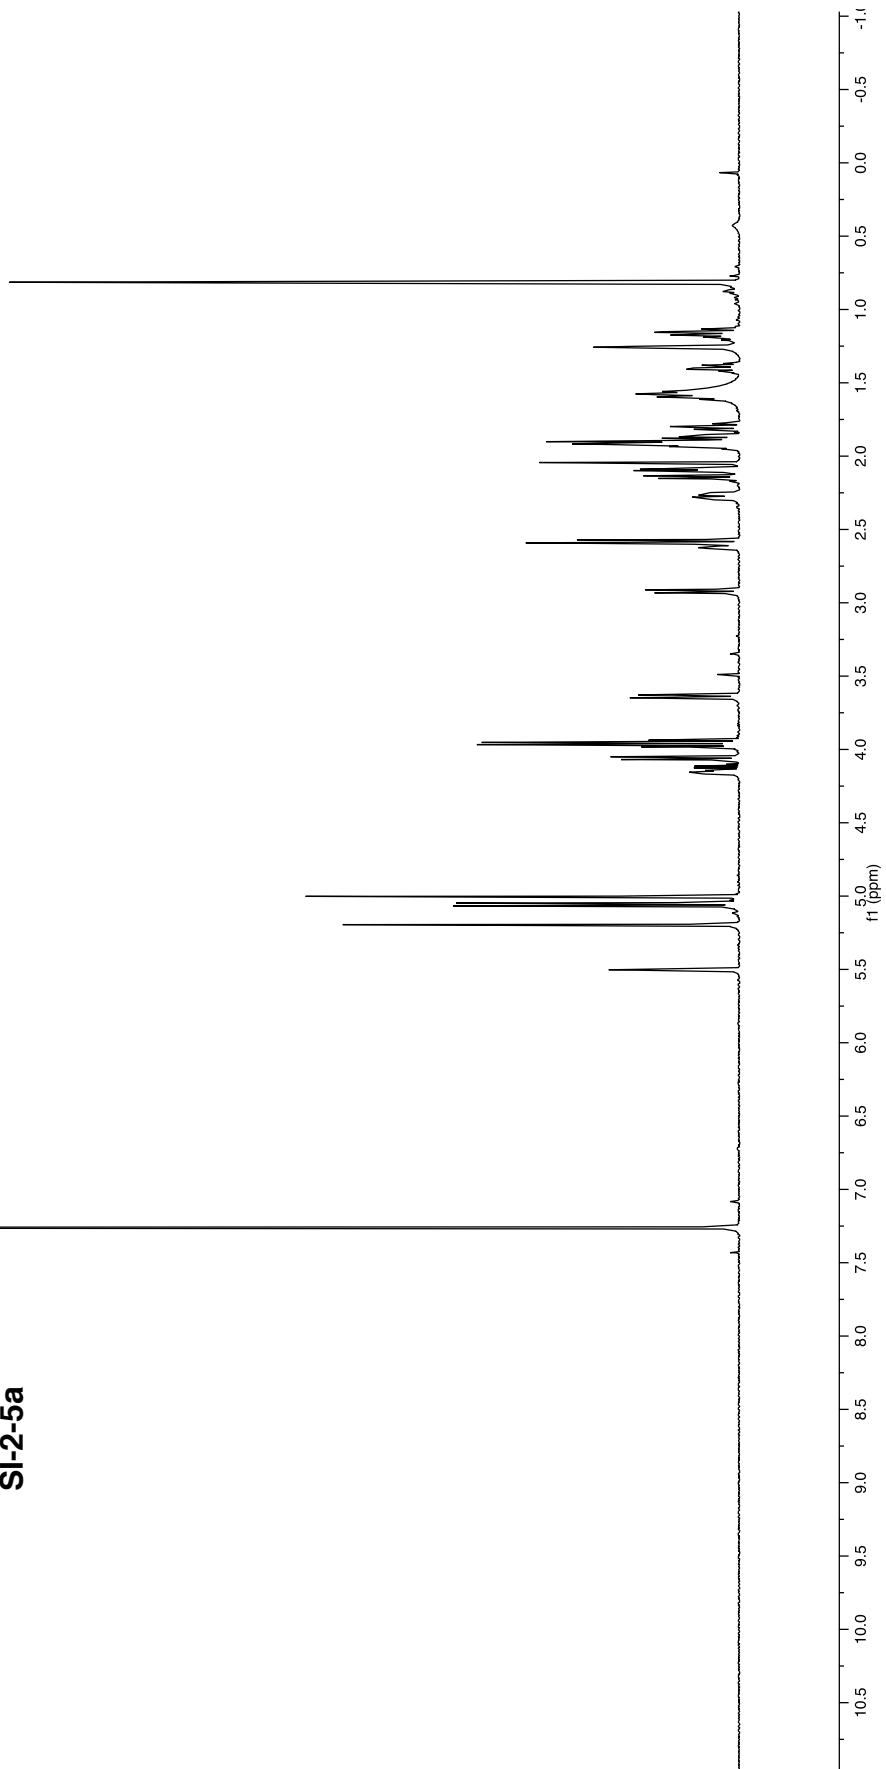



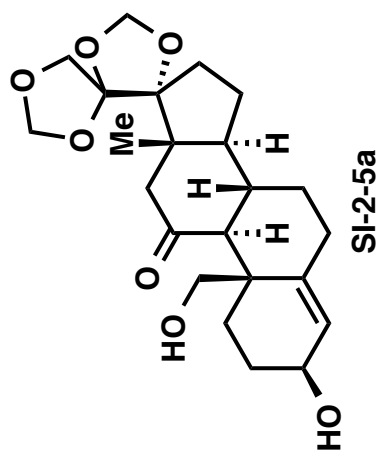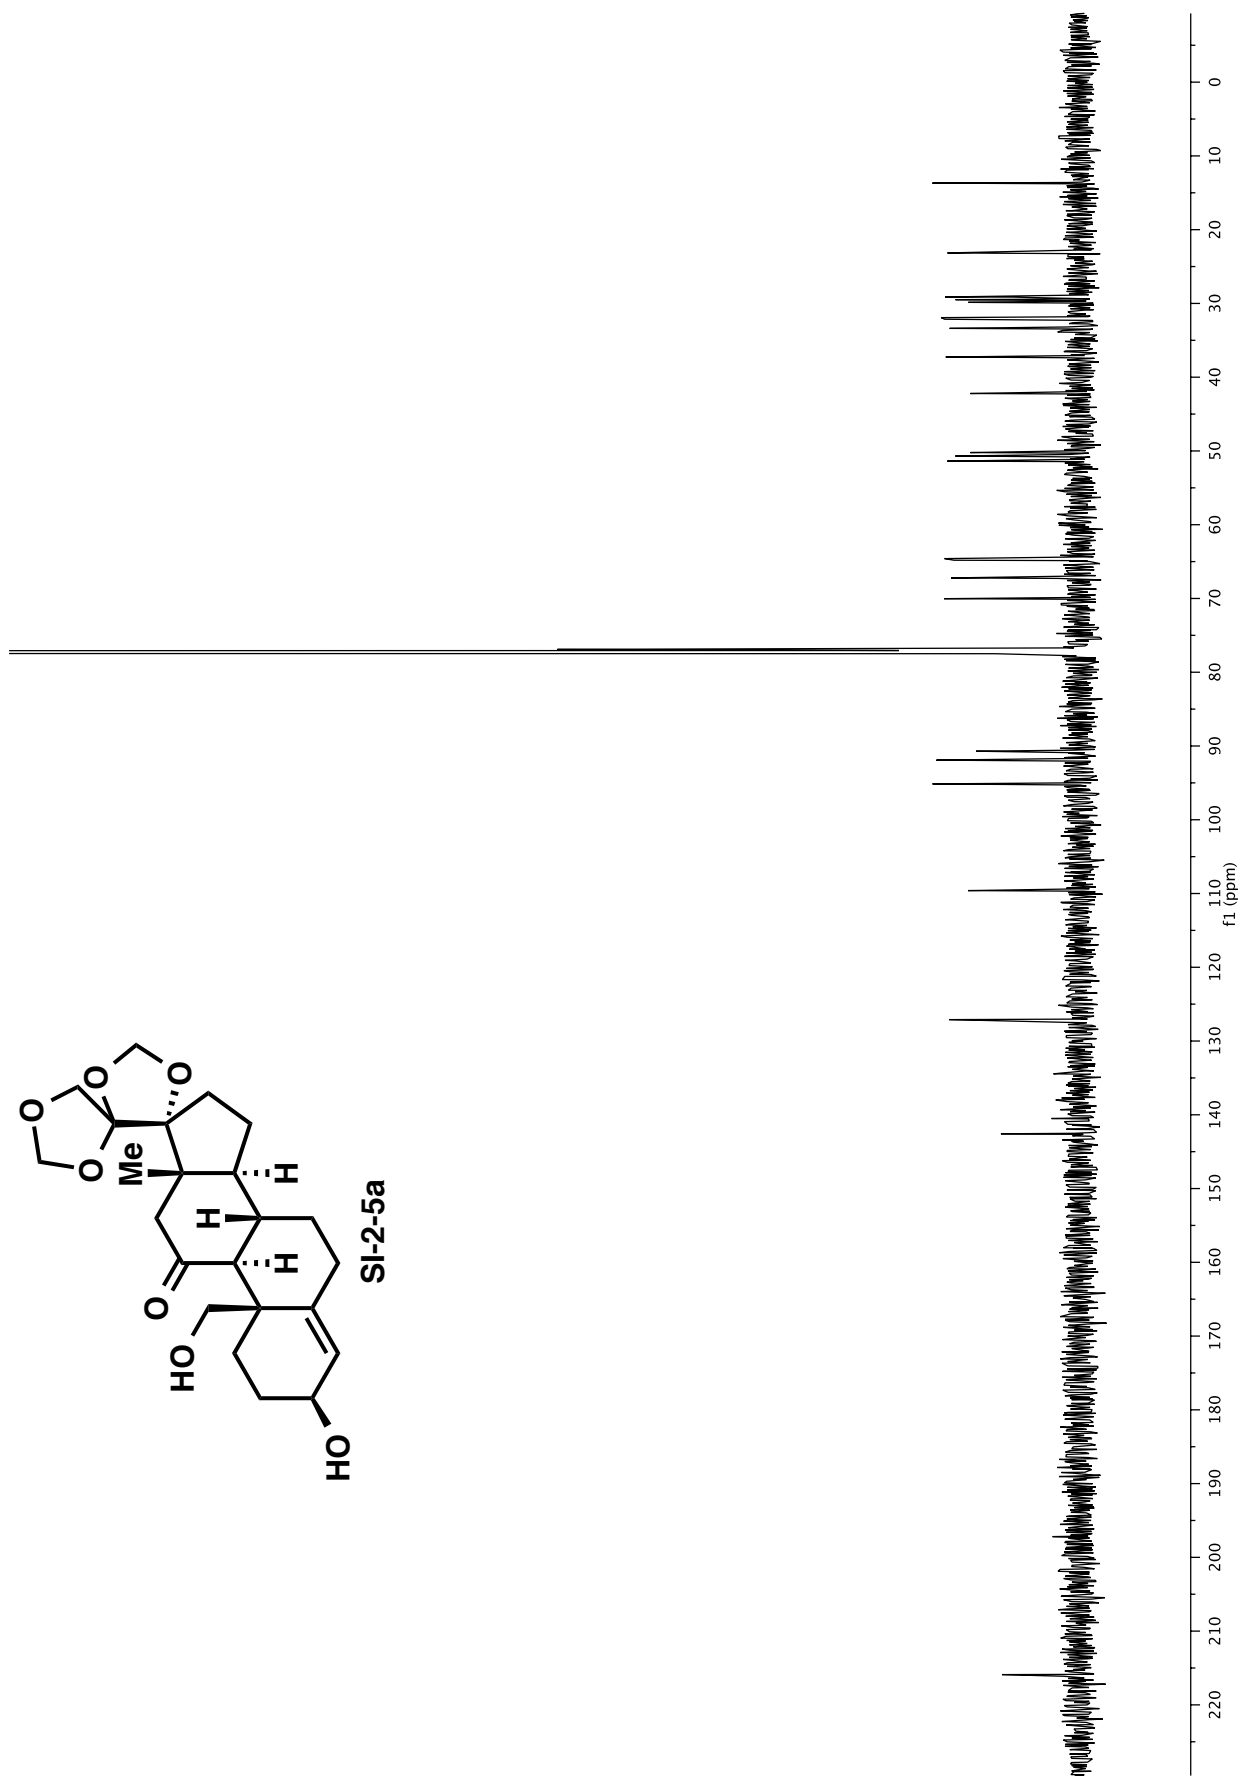

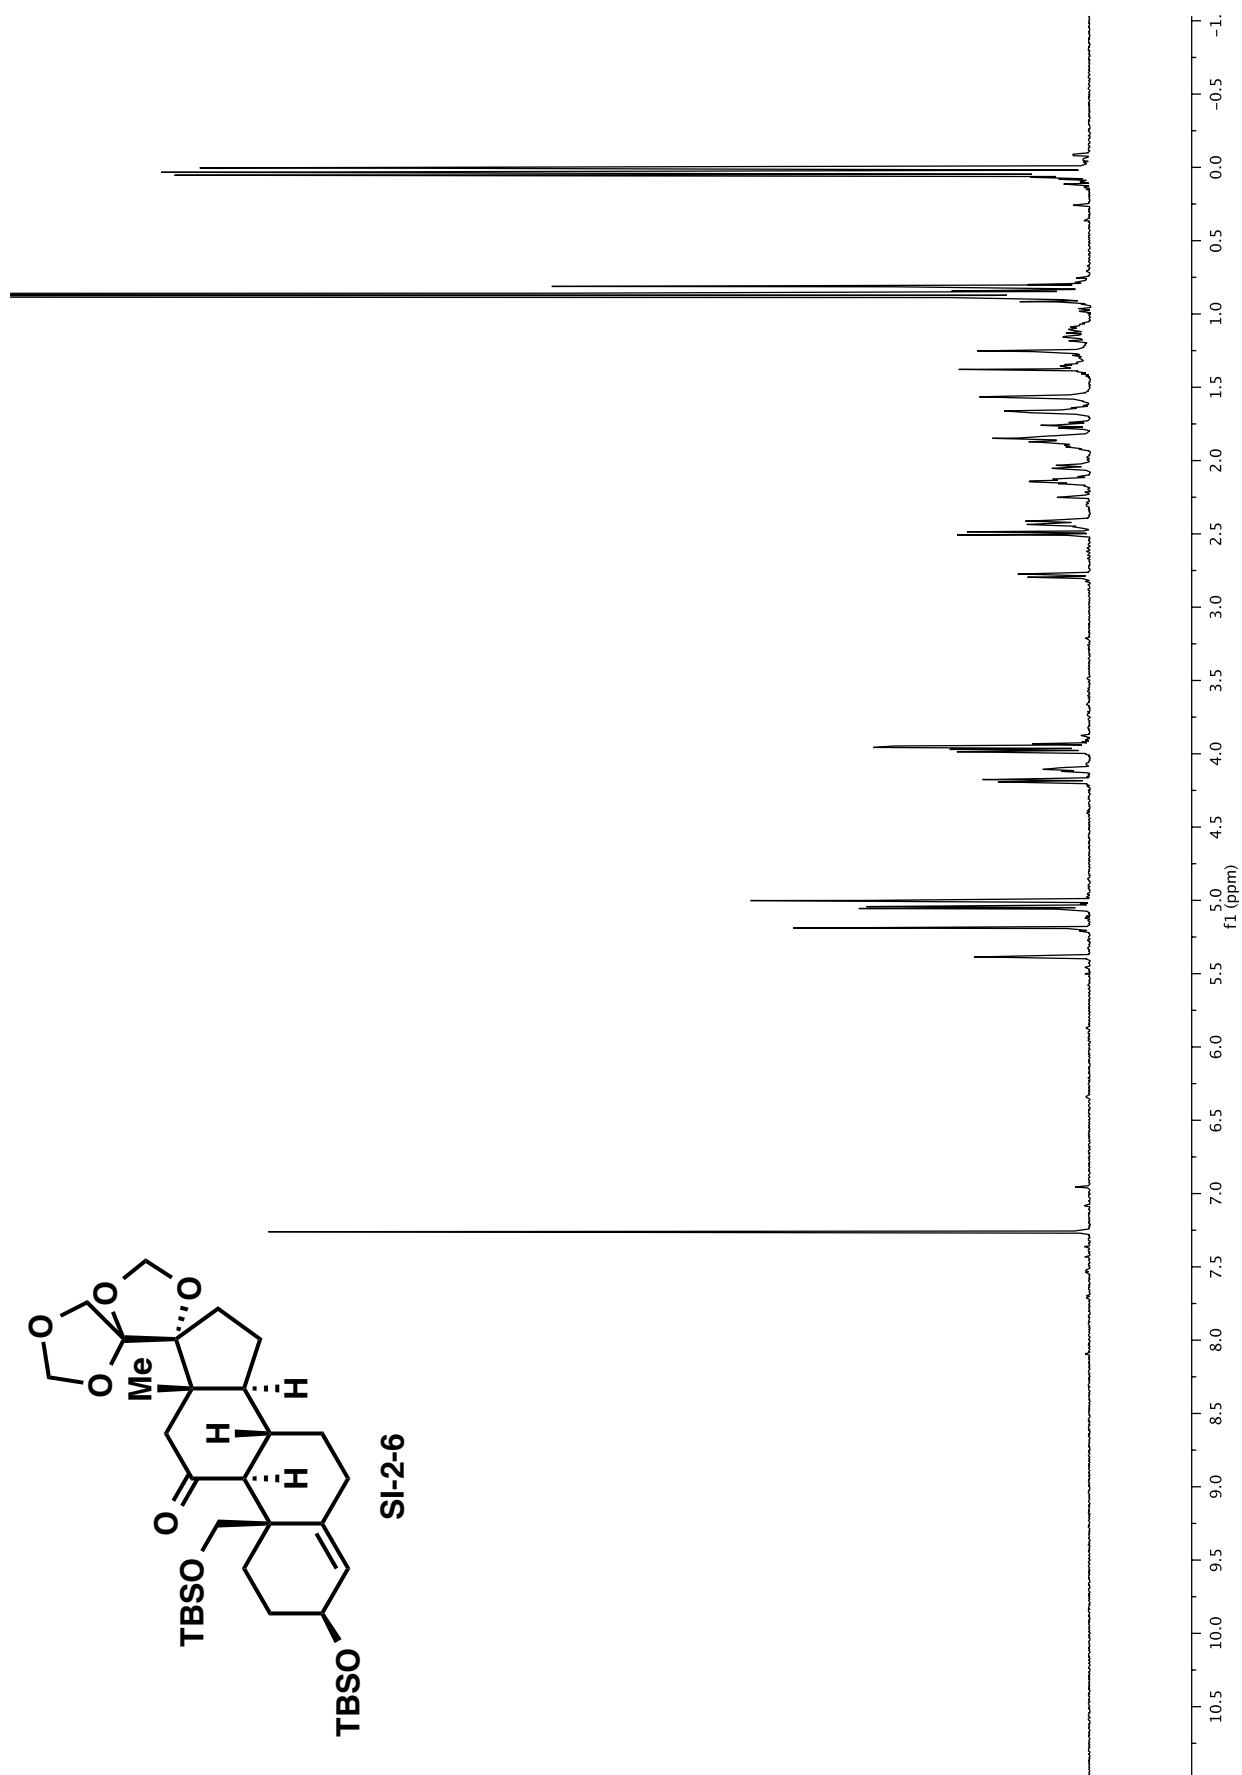

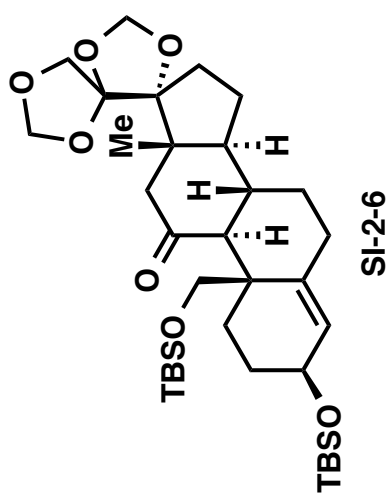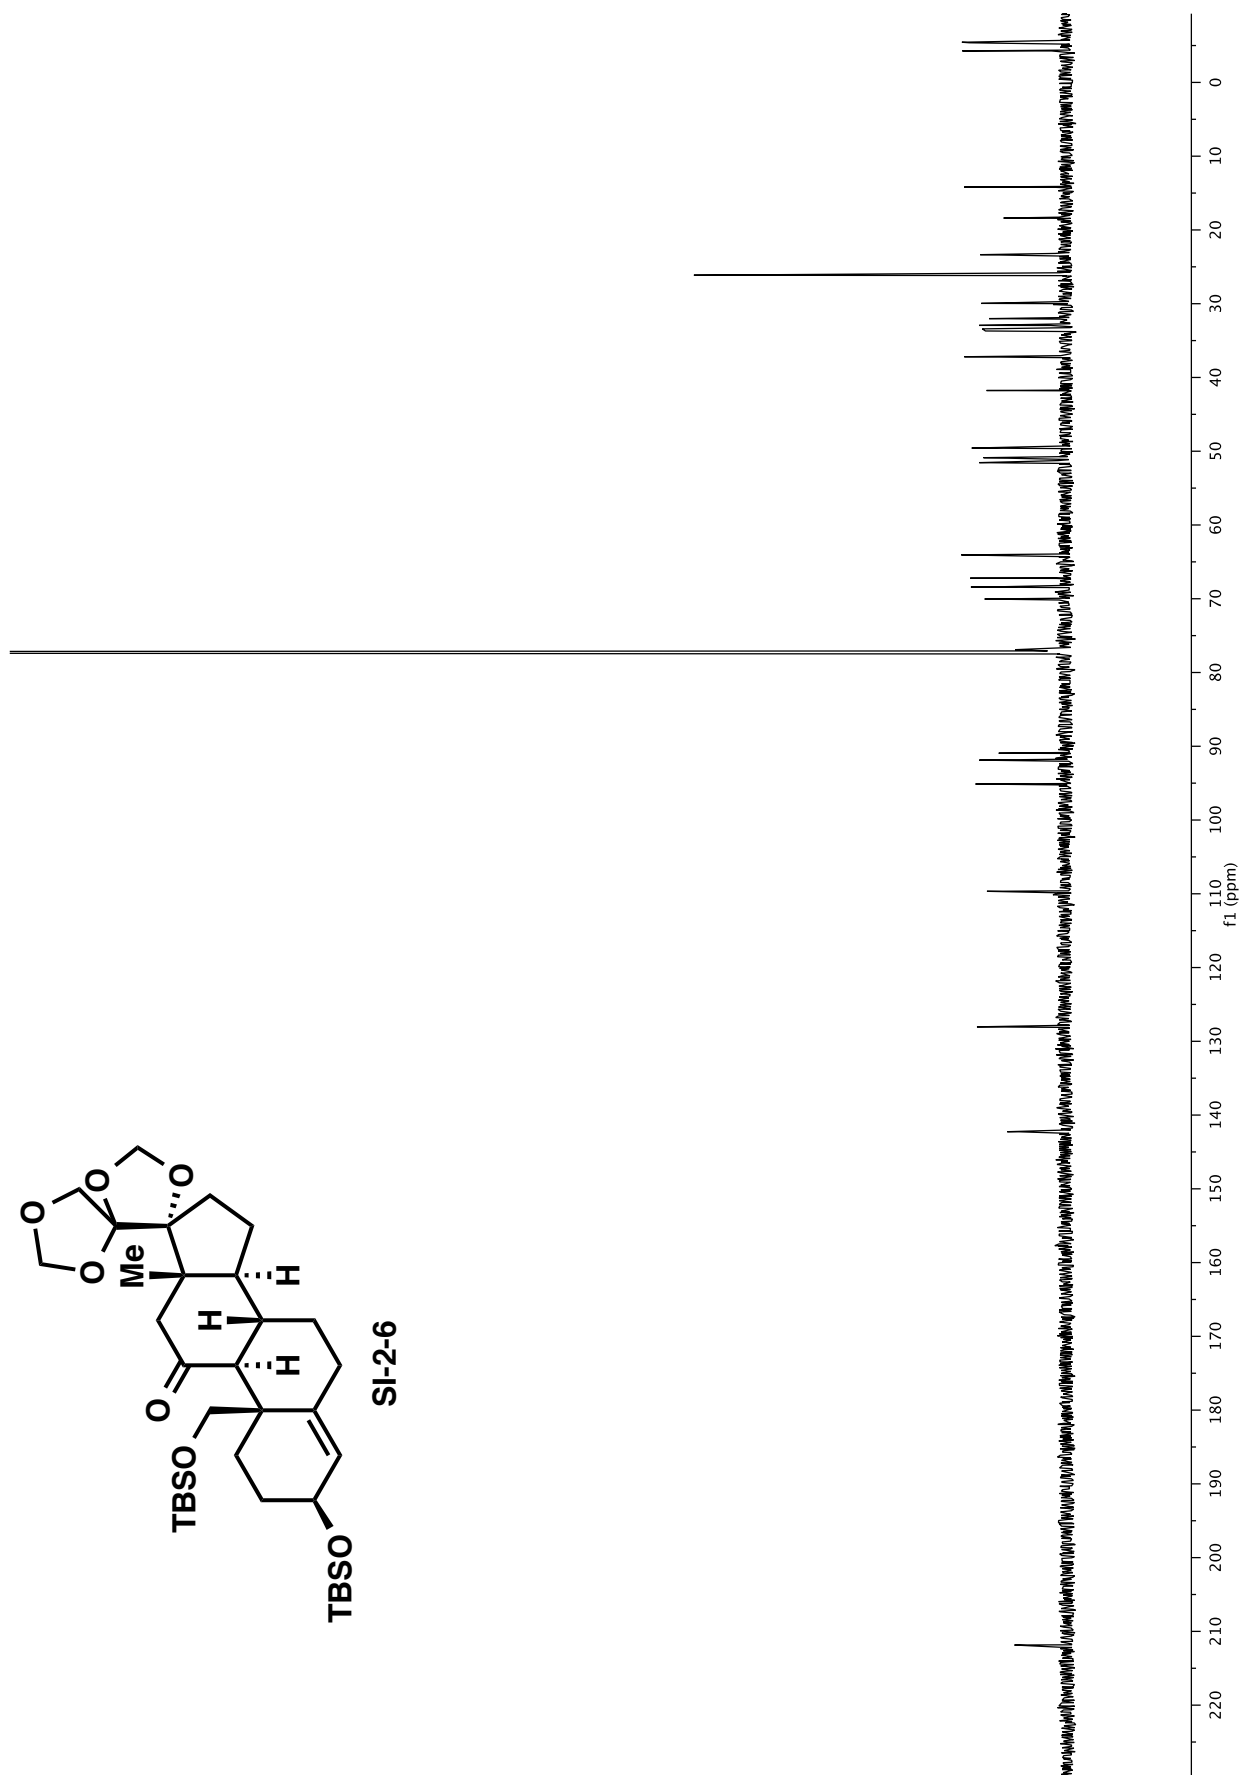

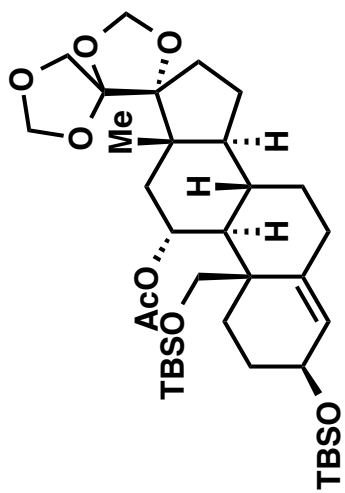

SI-2-7

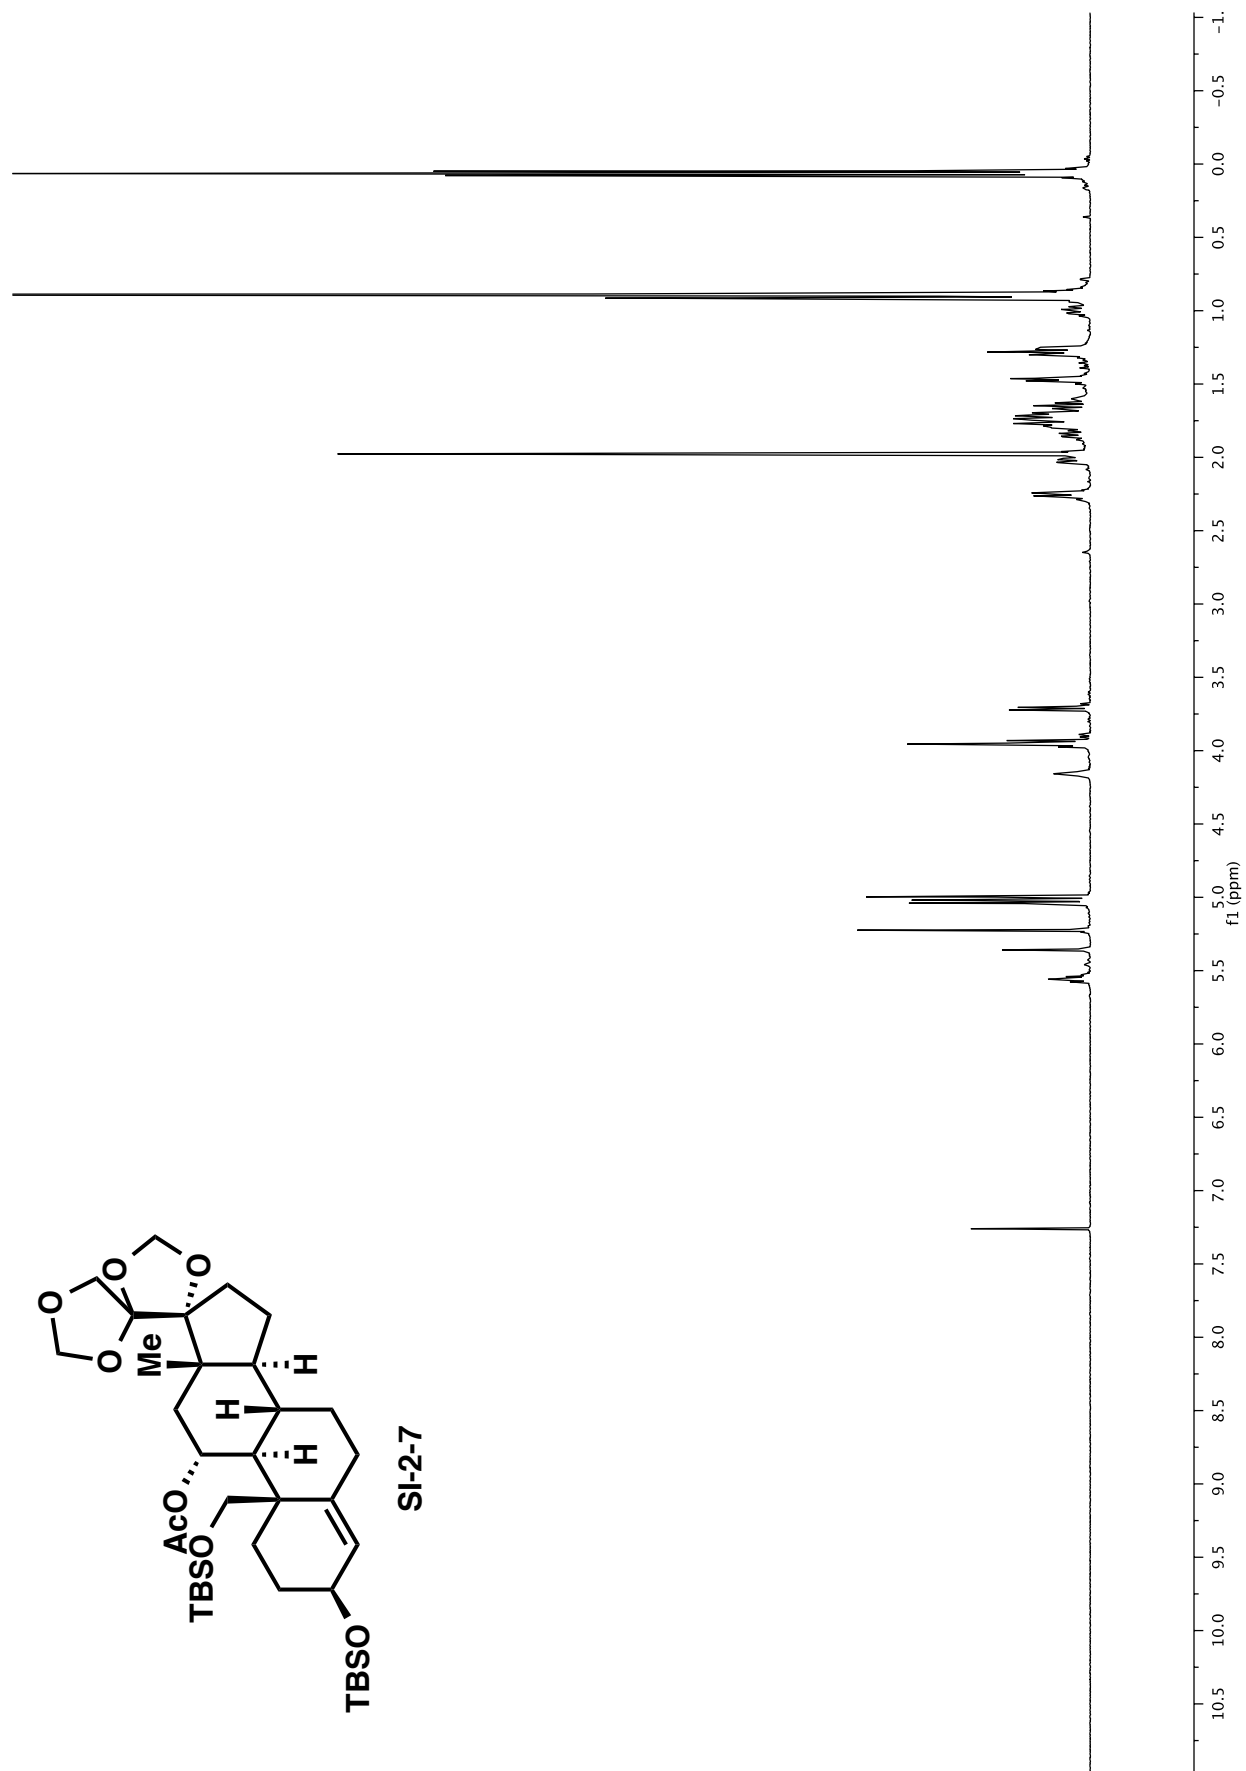

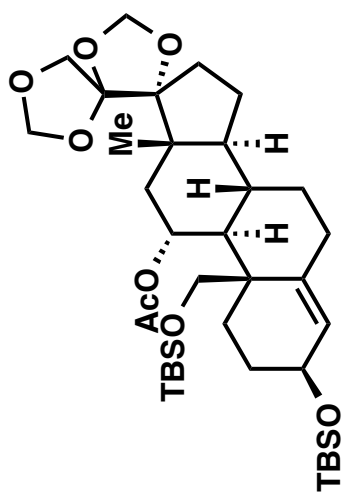

SI-2-7

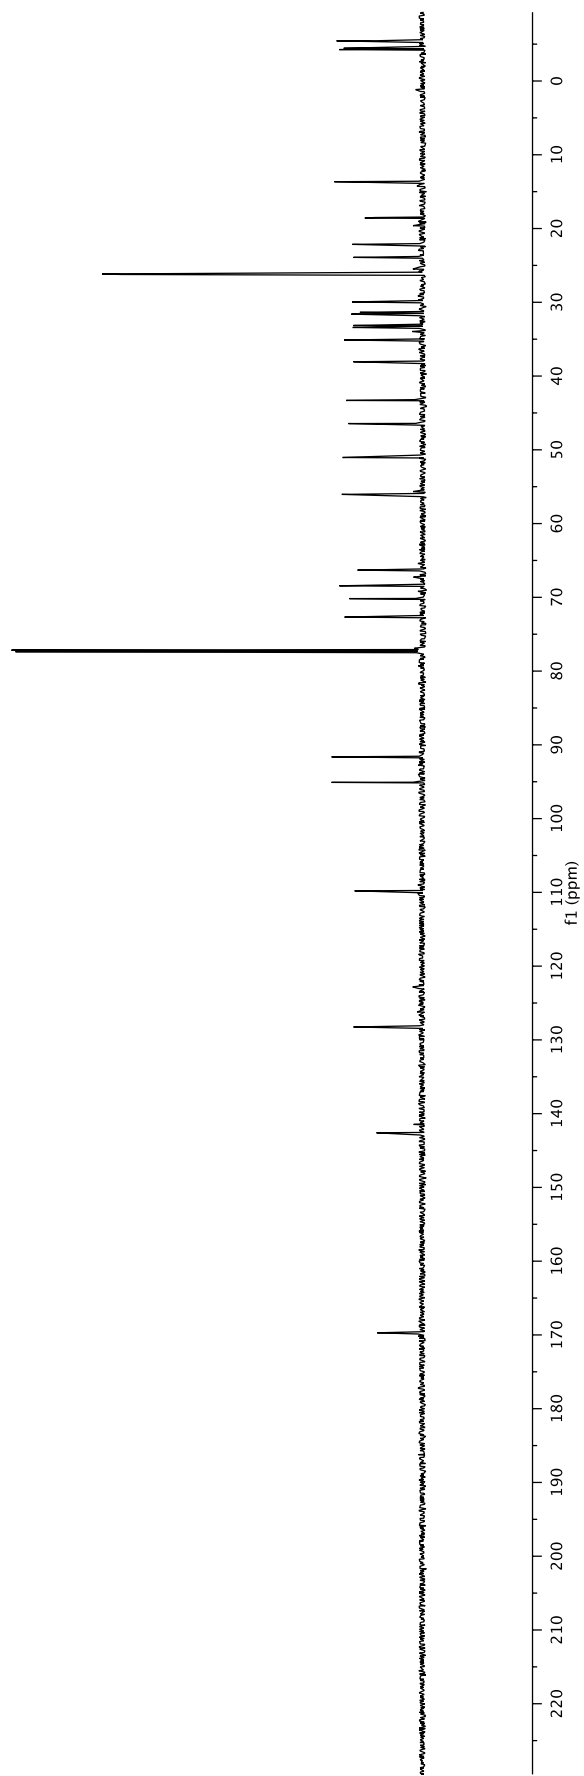

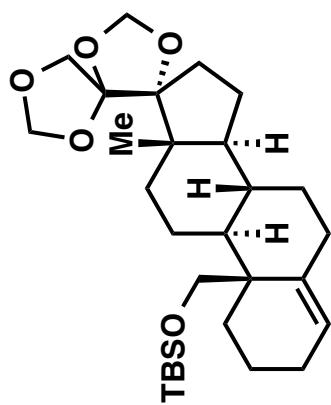

SI-2-7a

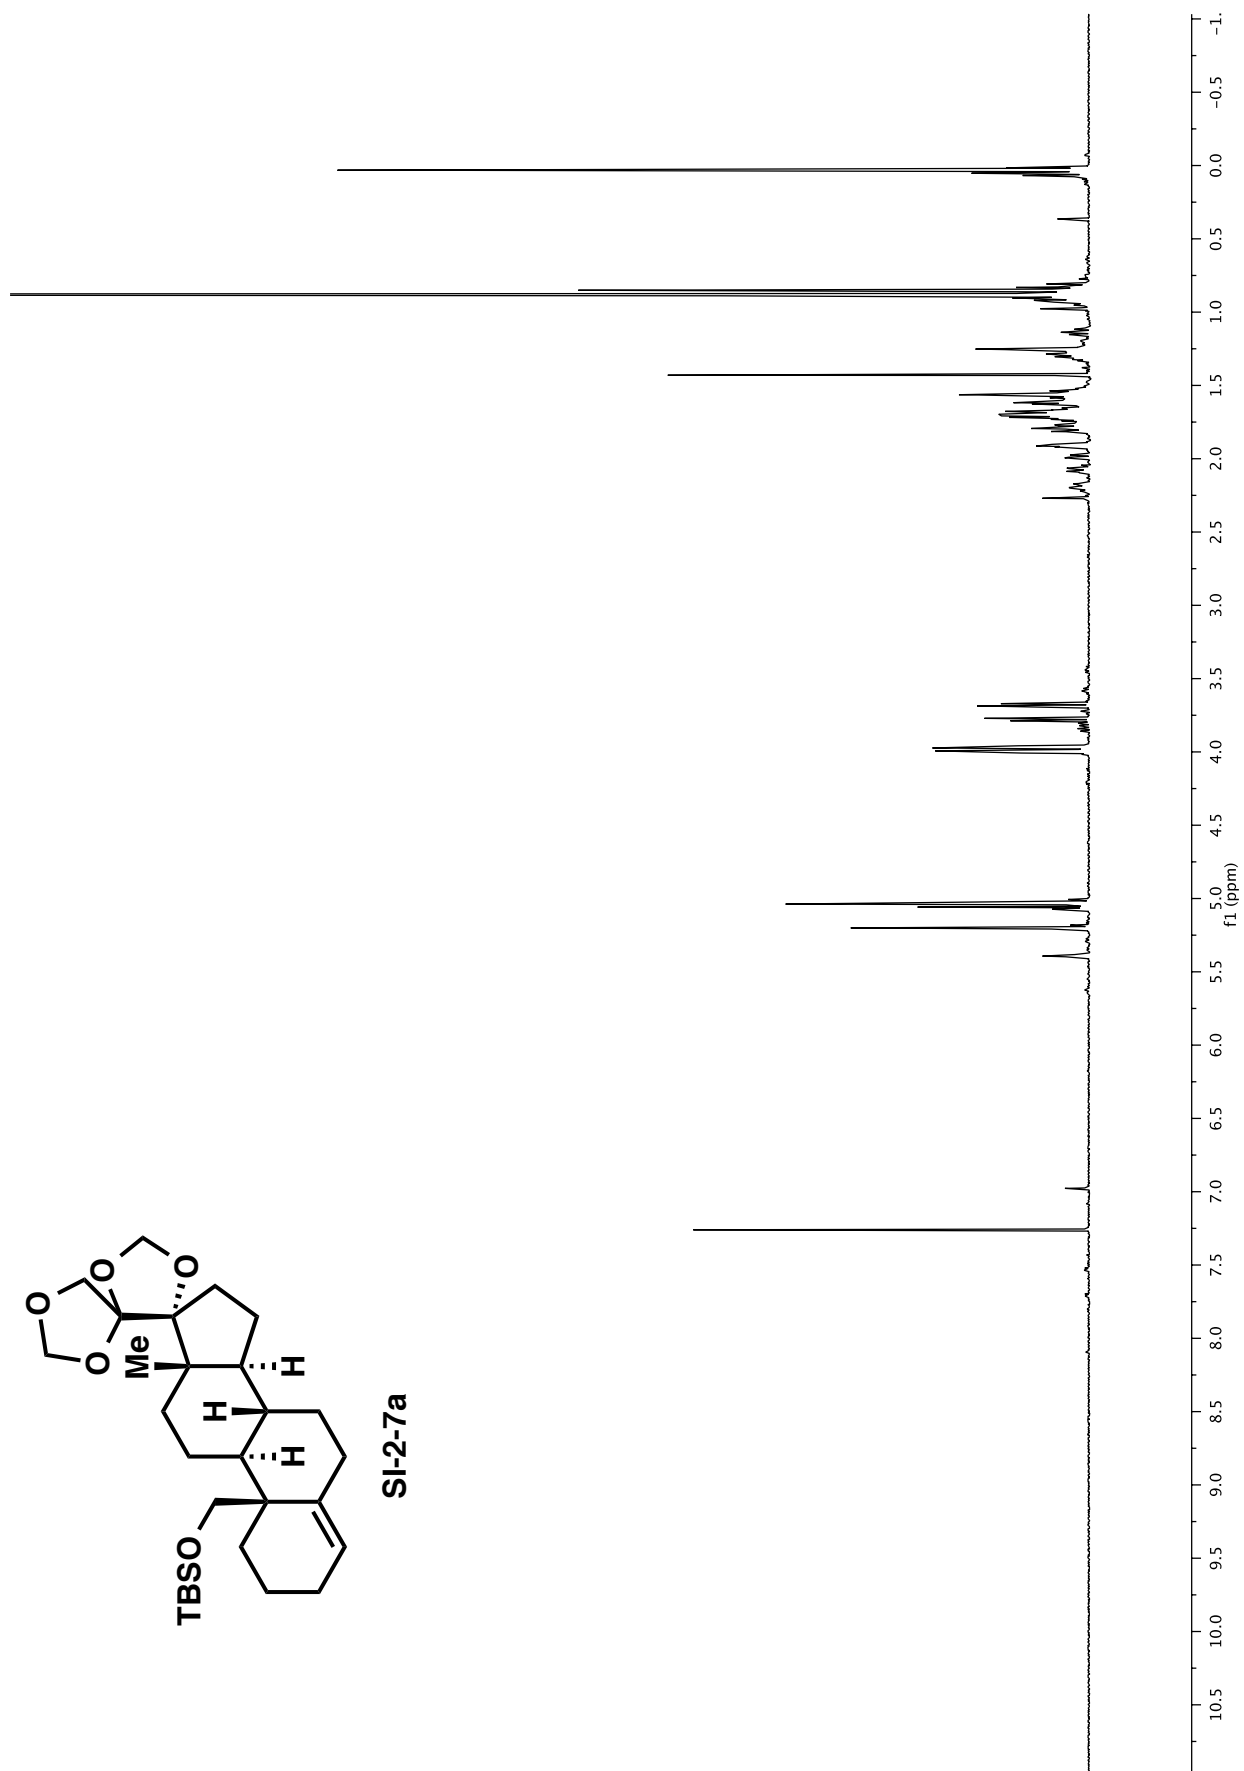

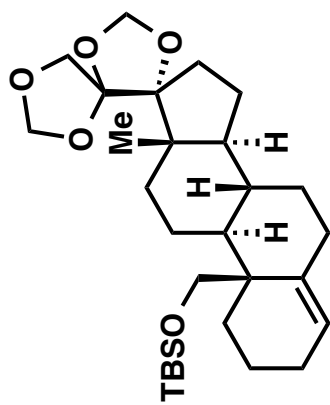

SI-2-7a

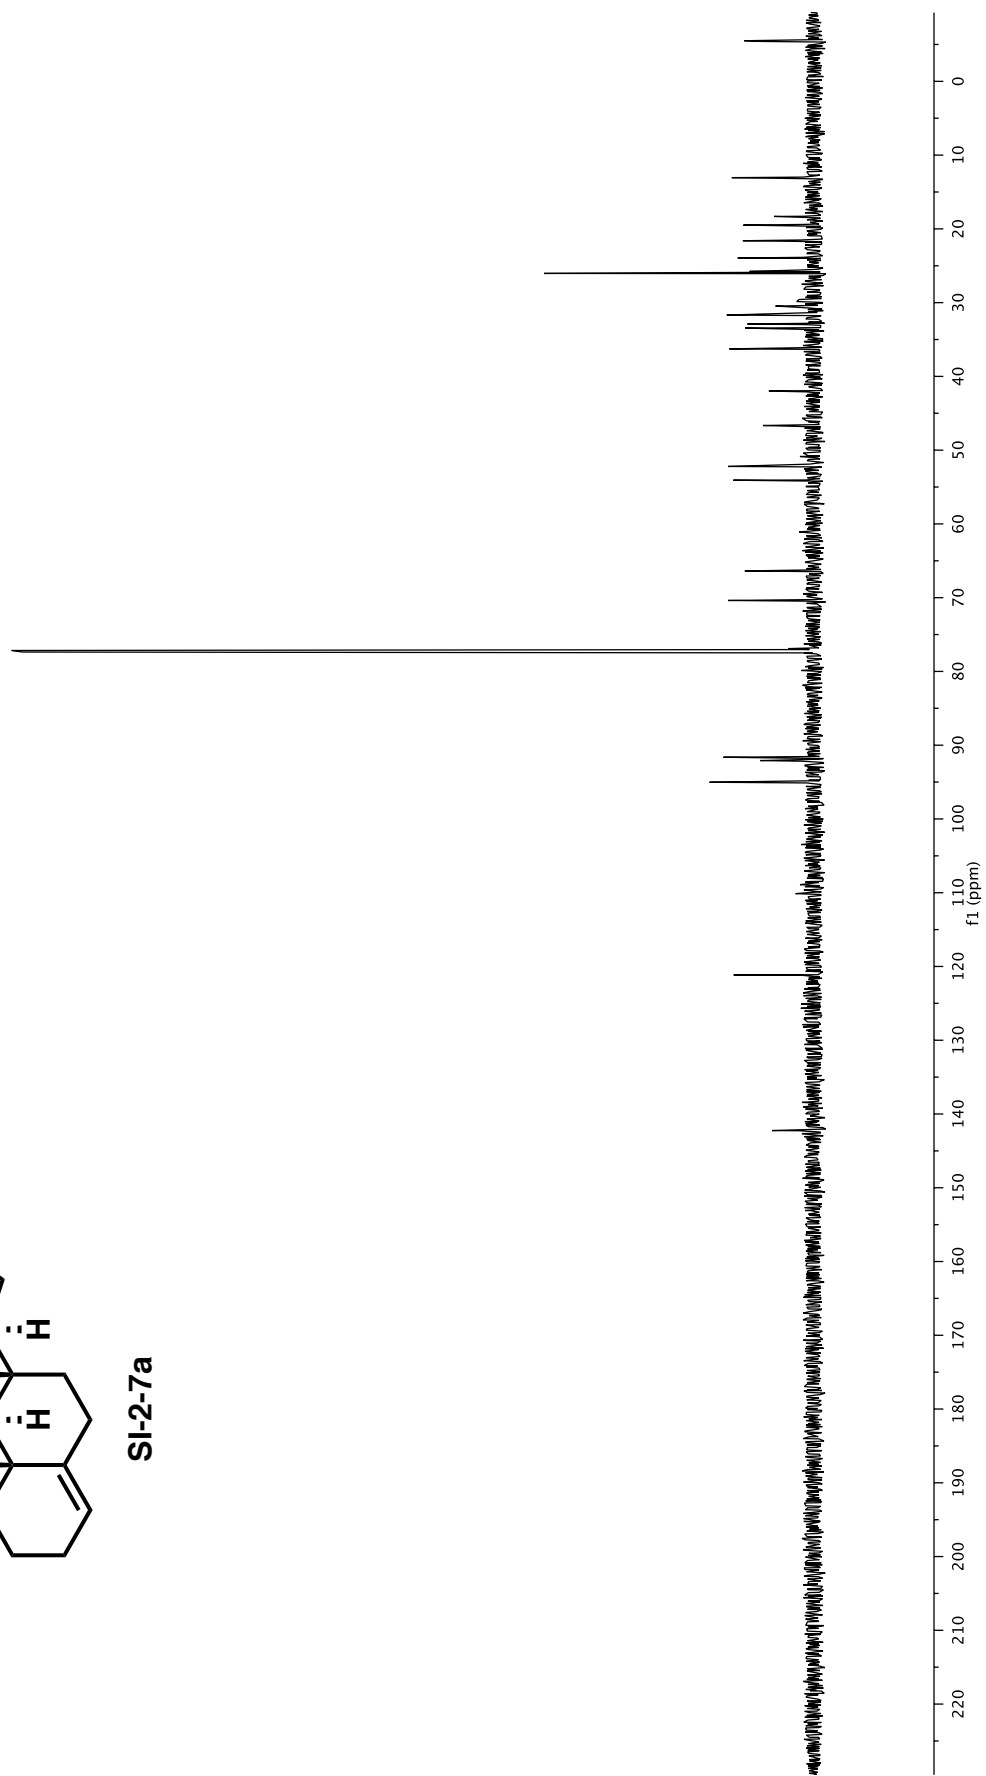

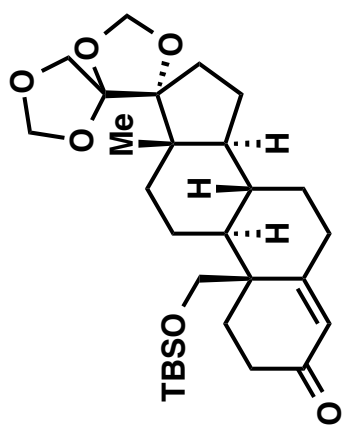

SI-2-8

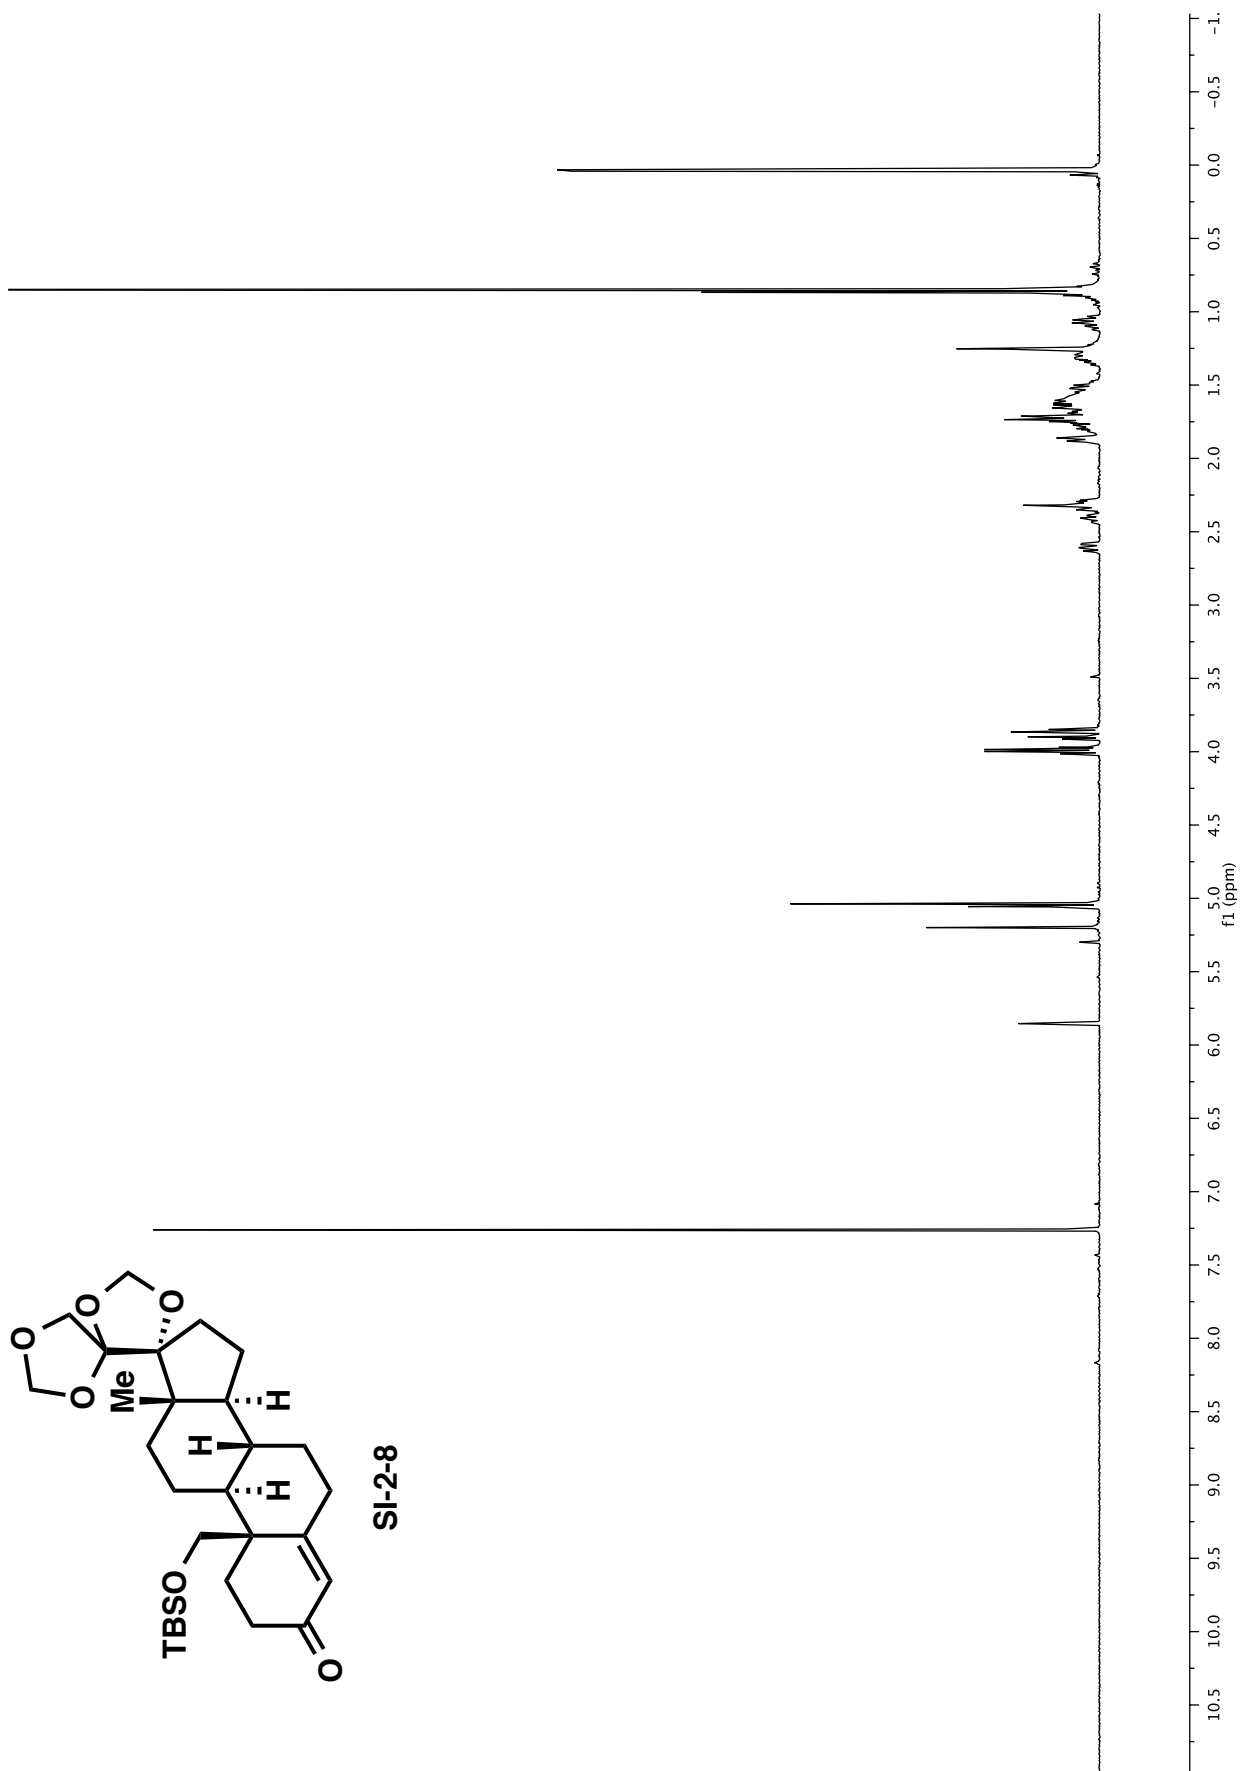



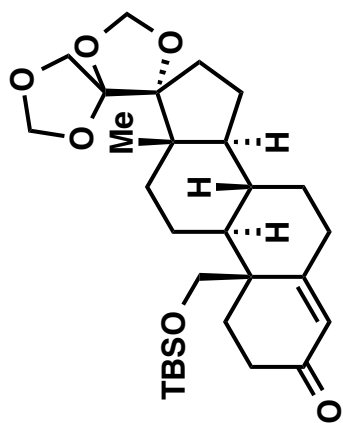

SI-2-8

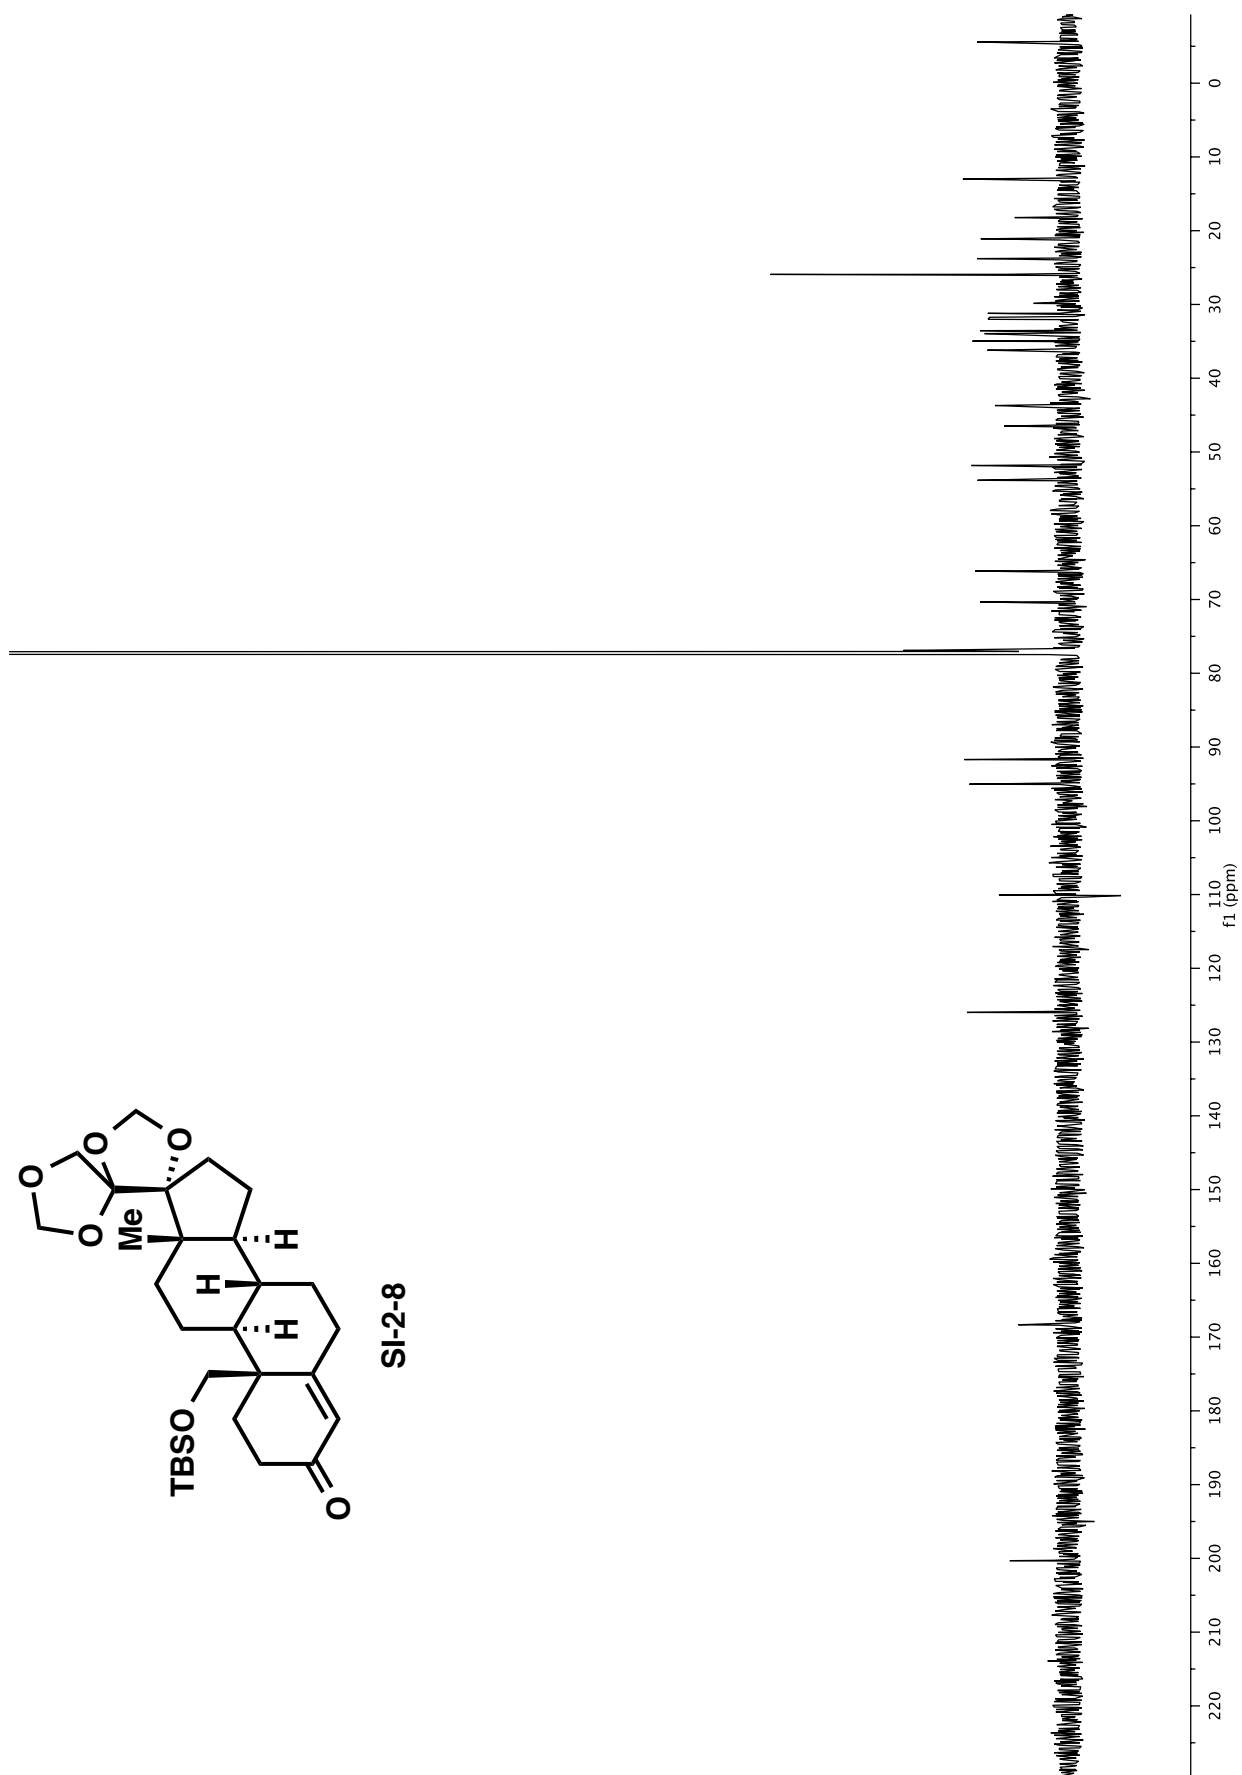

SI-114

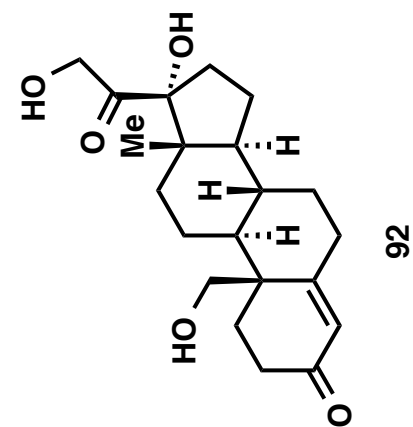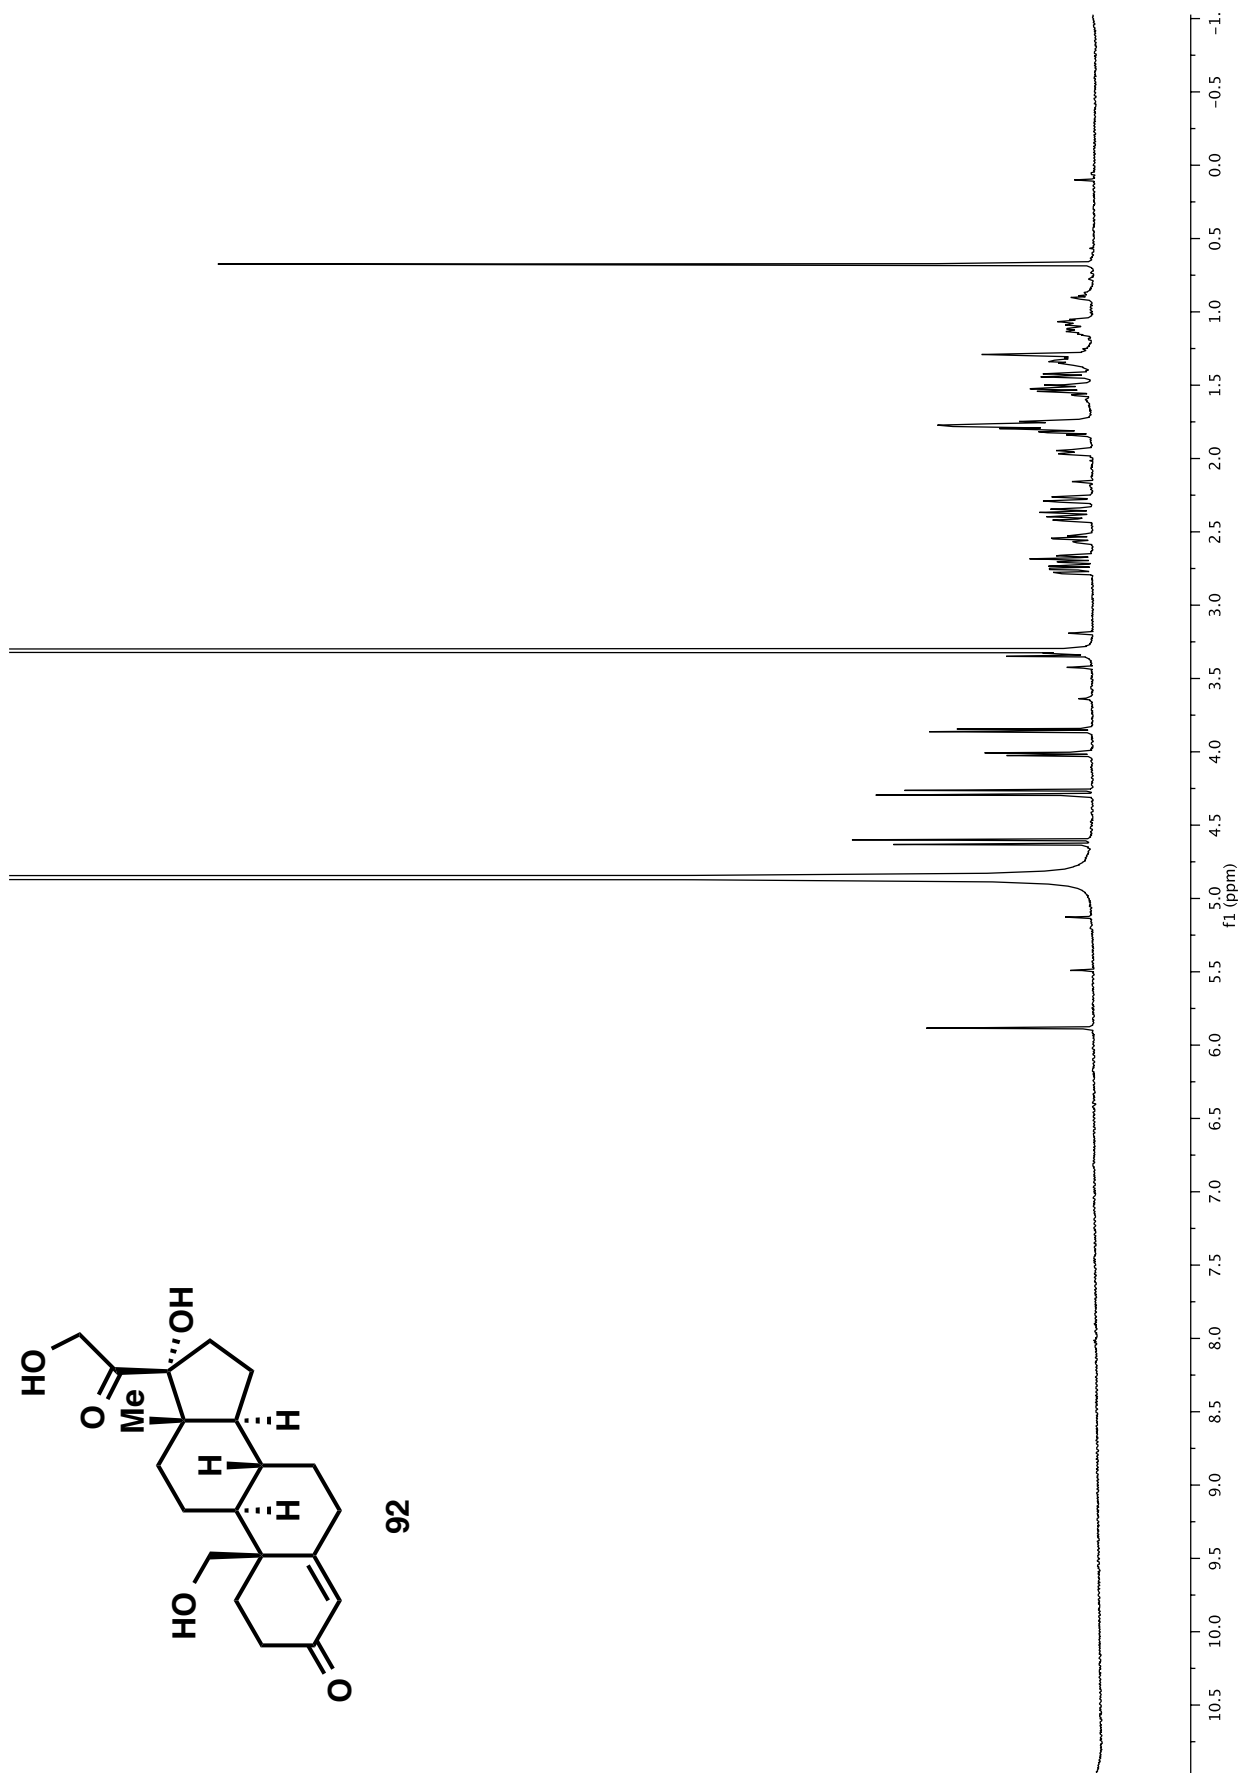

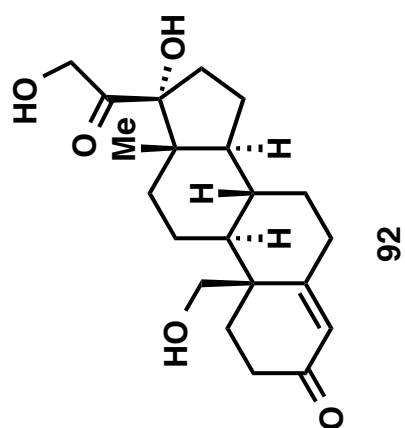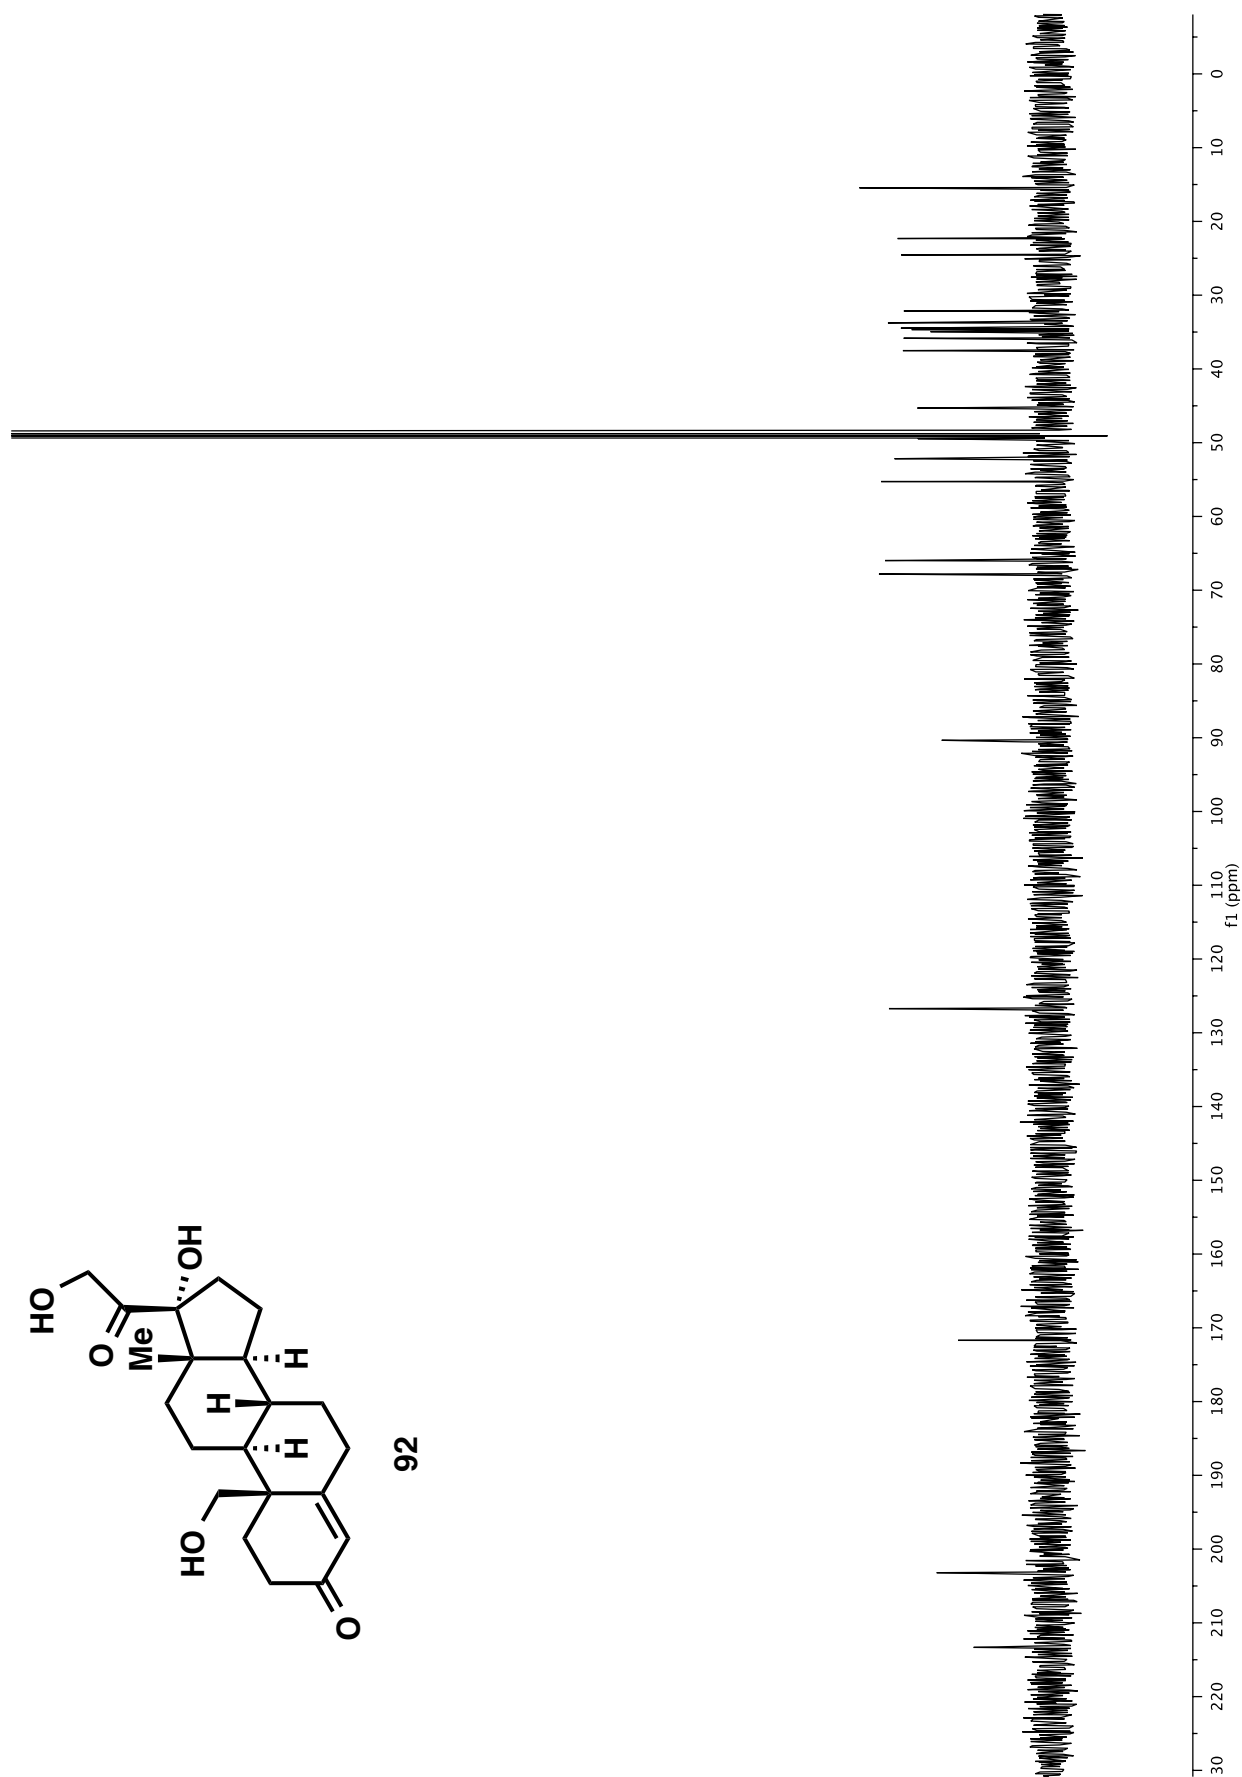

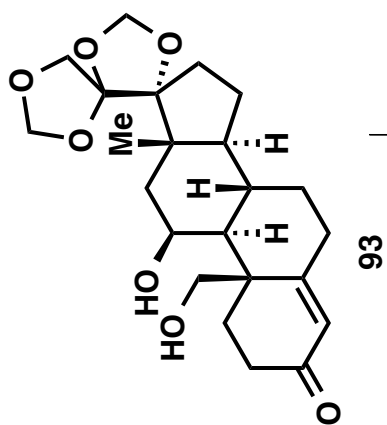

93

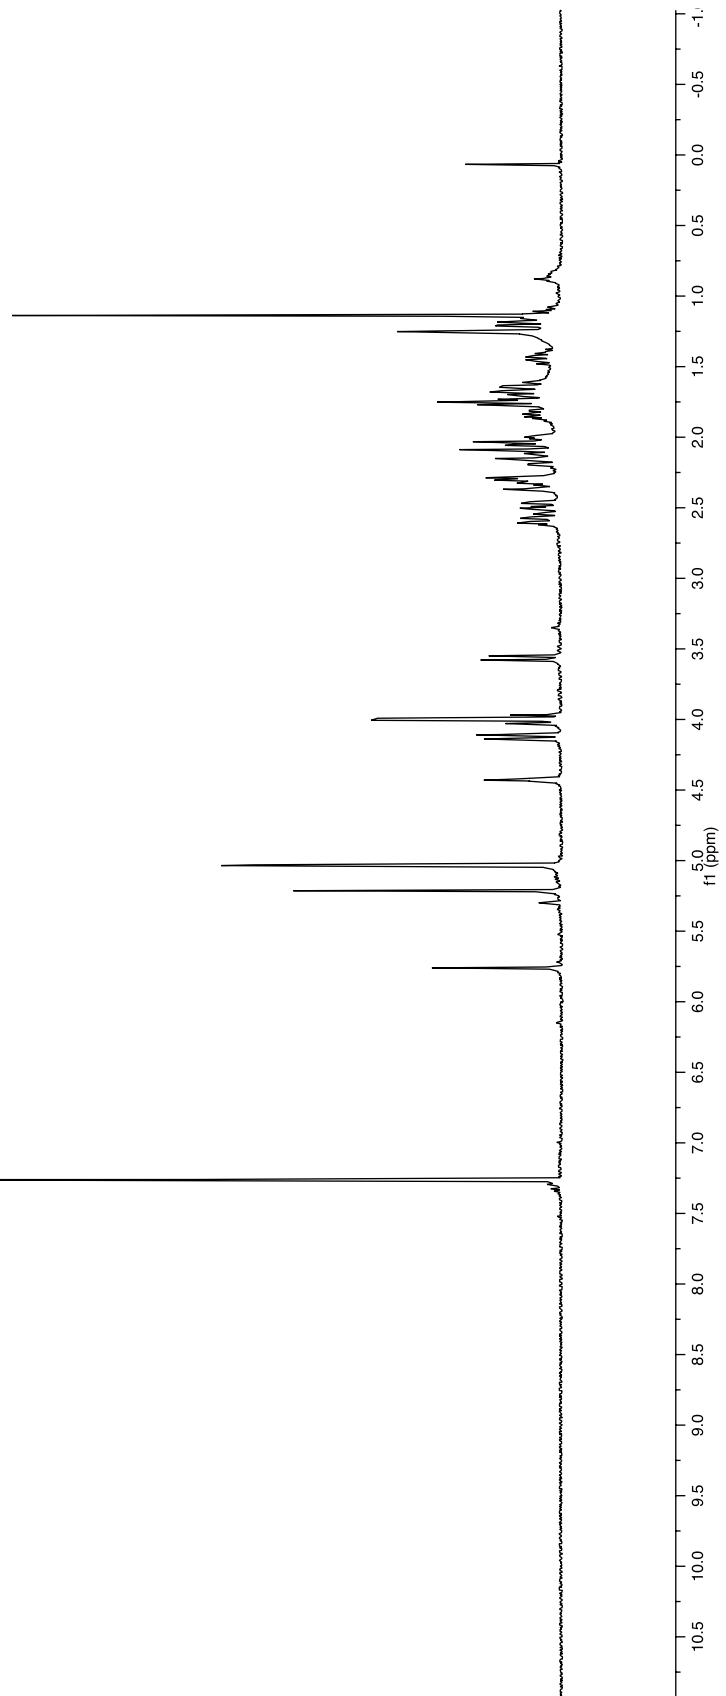

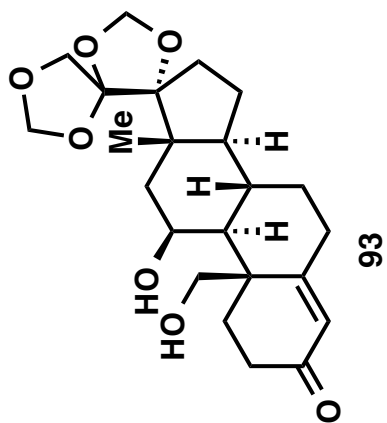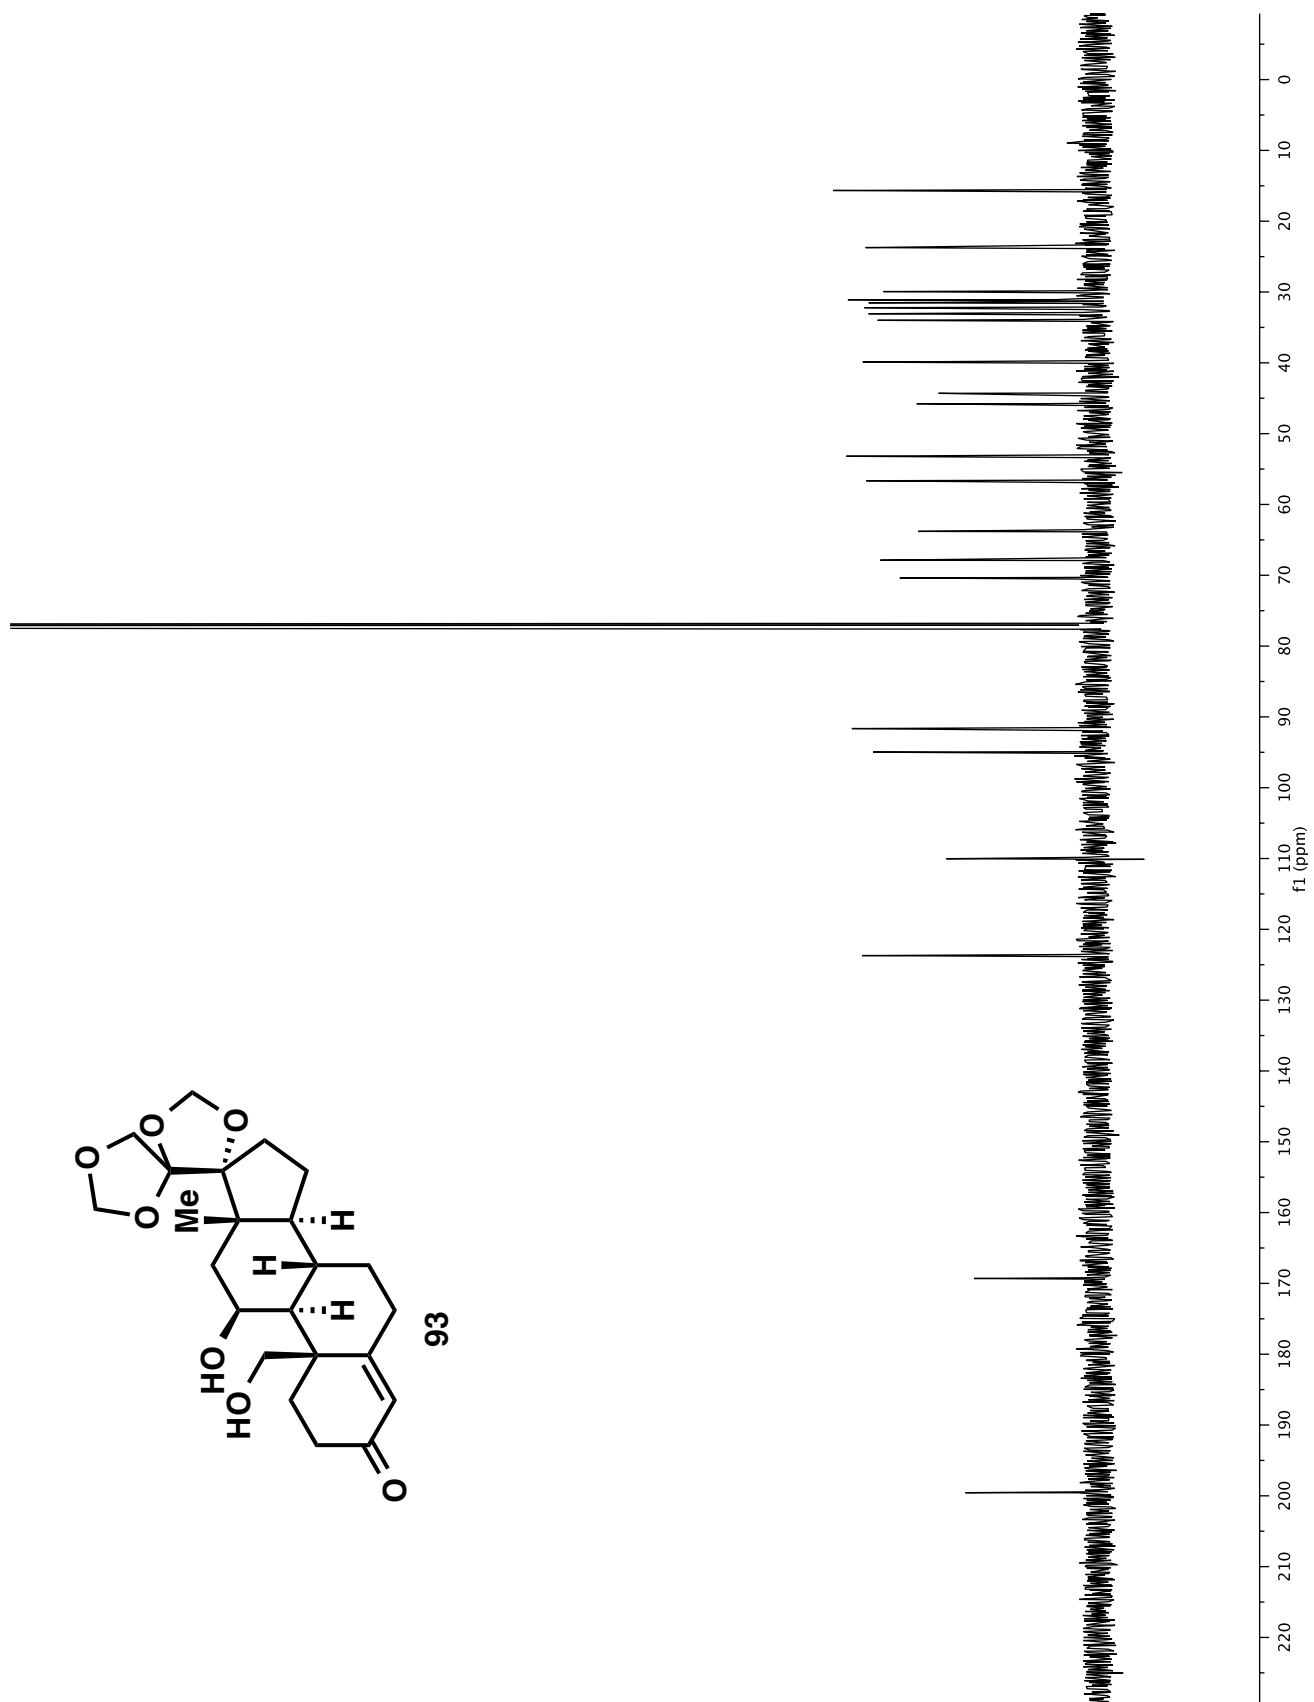

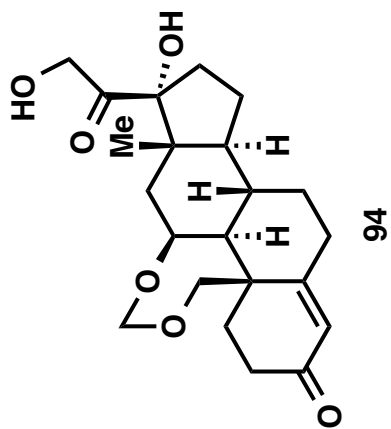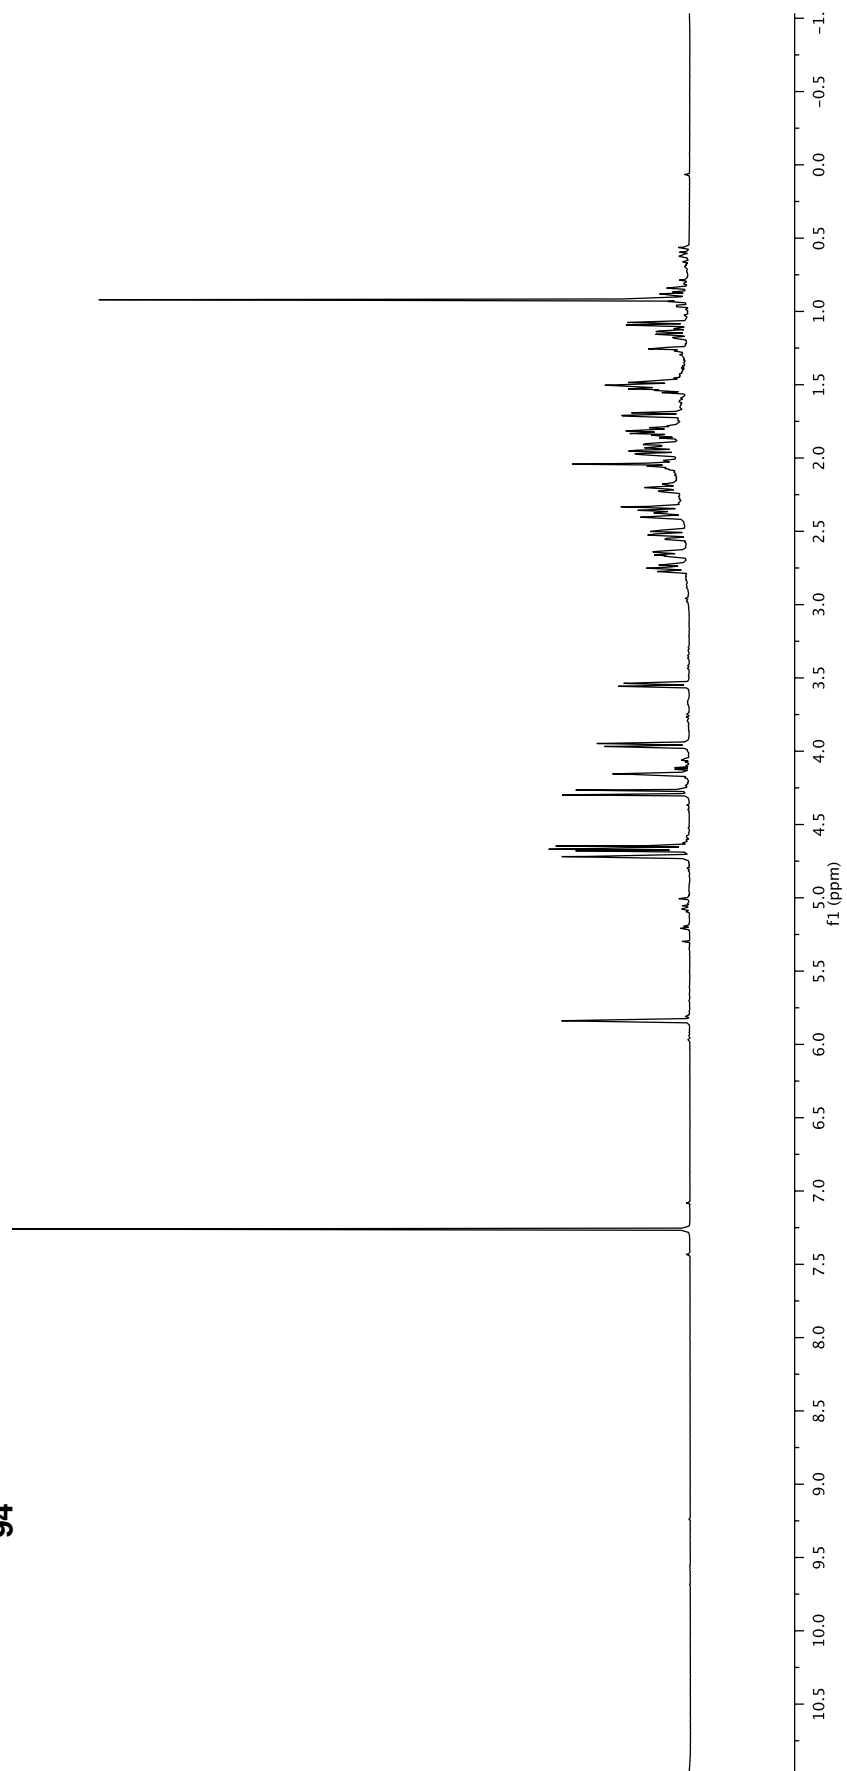

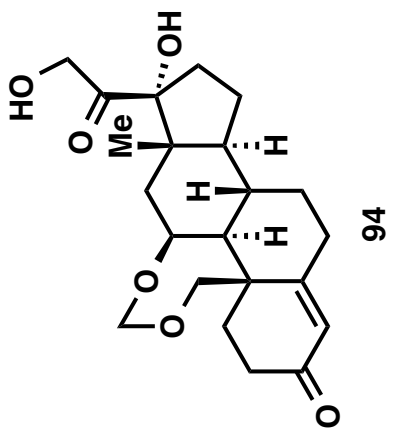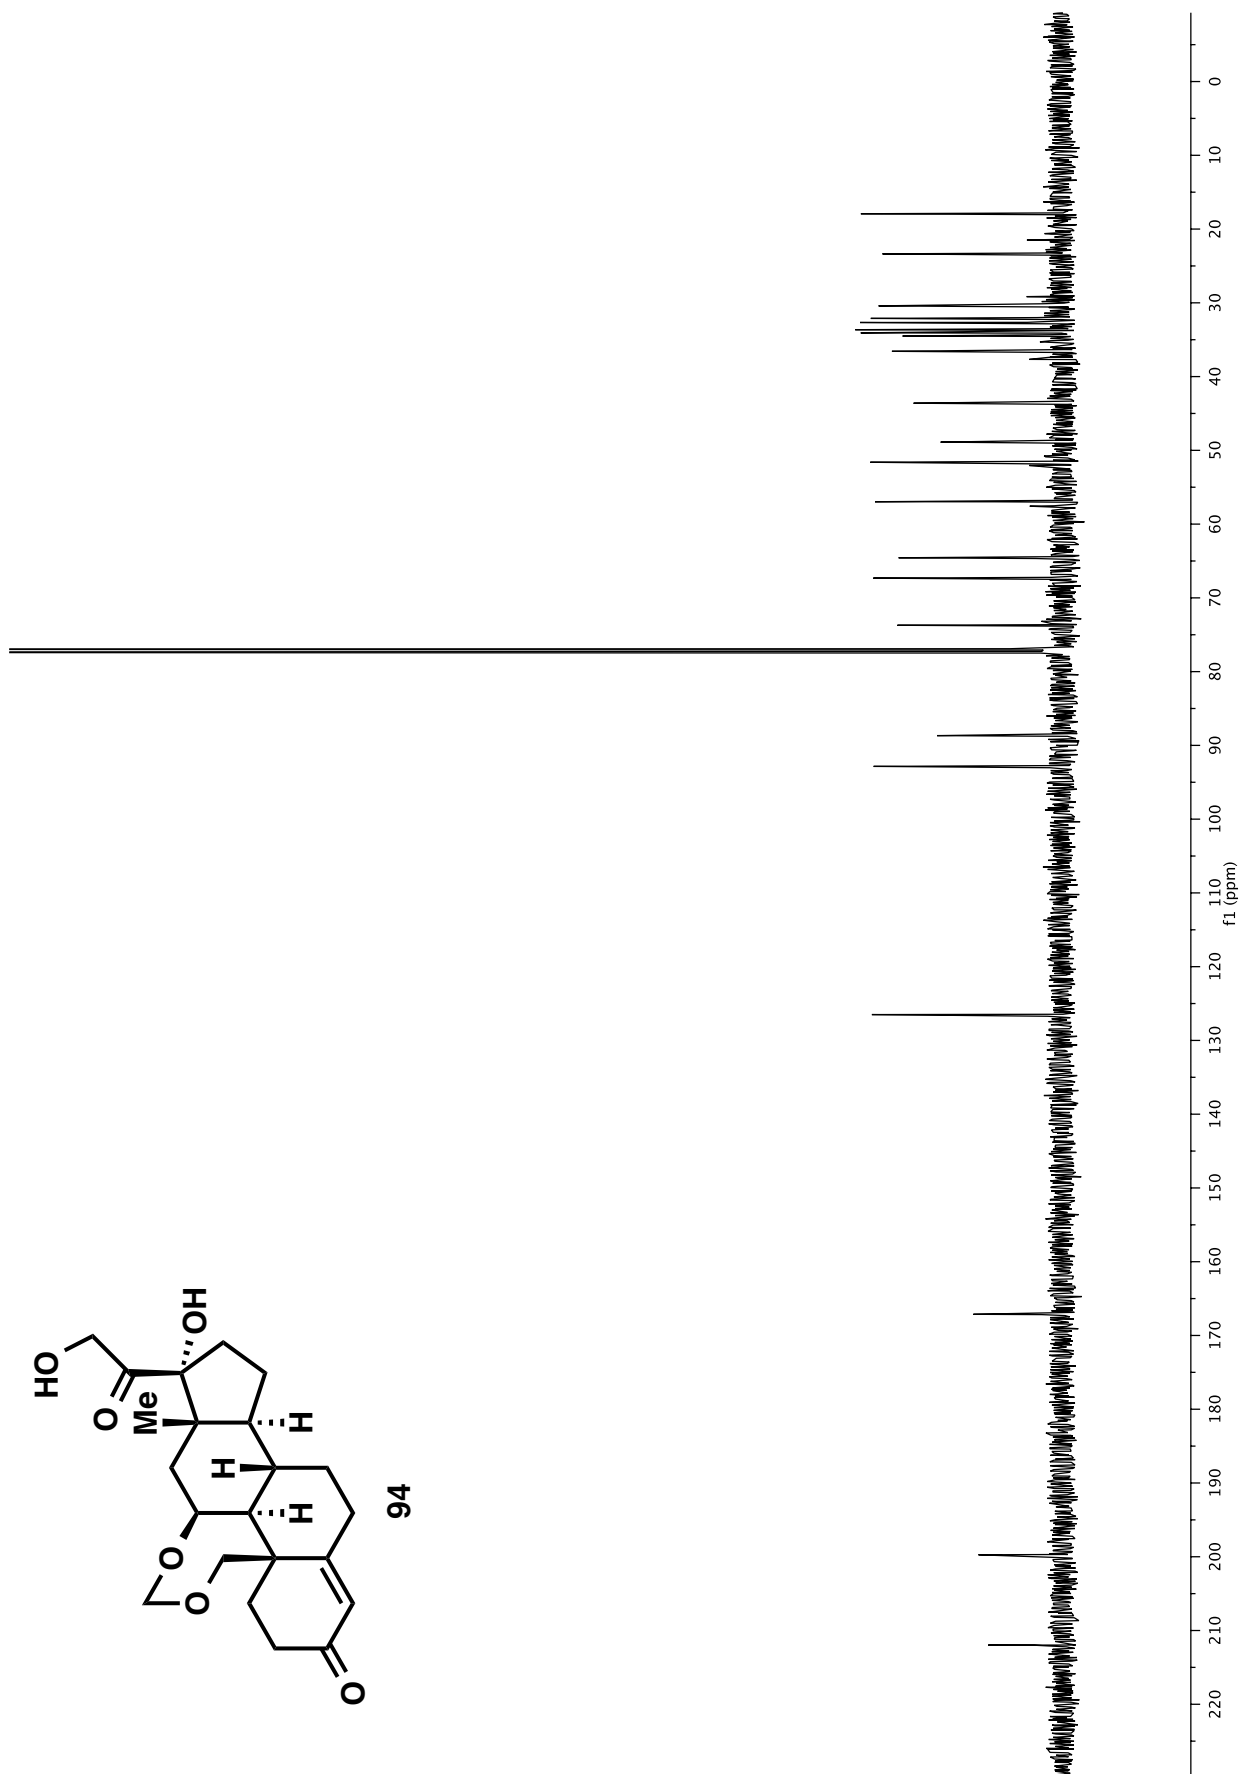

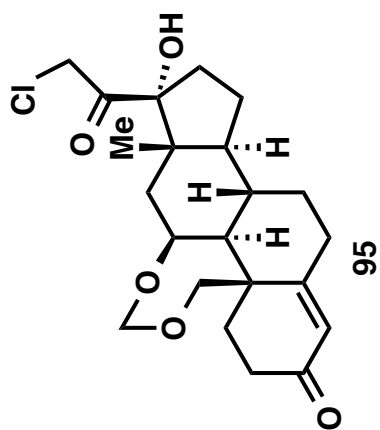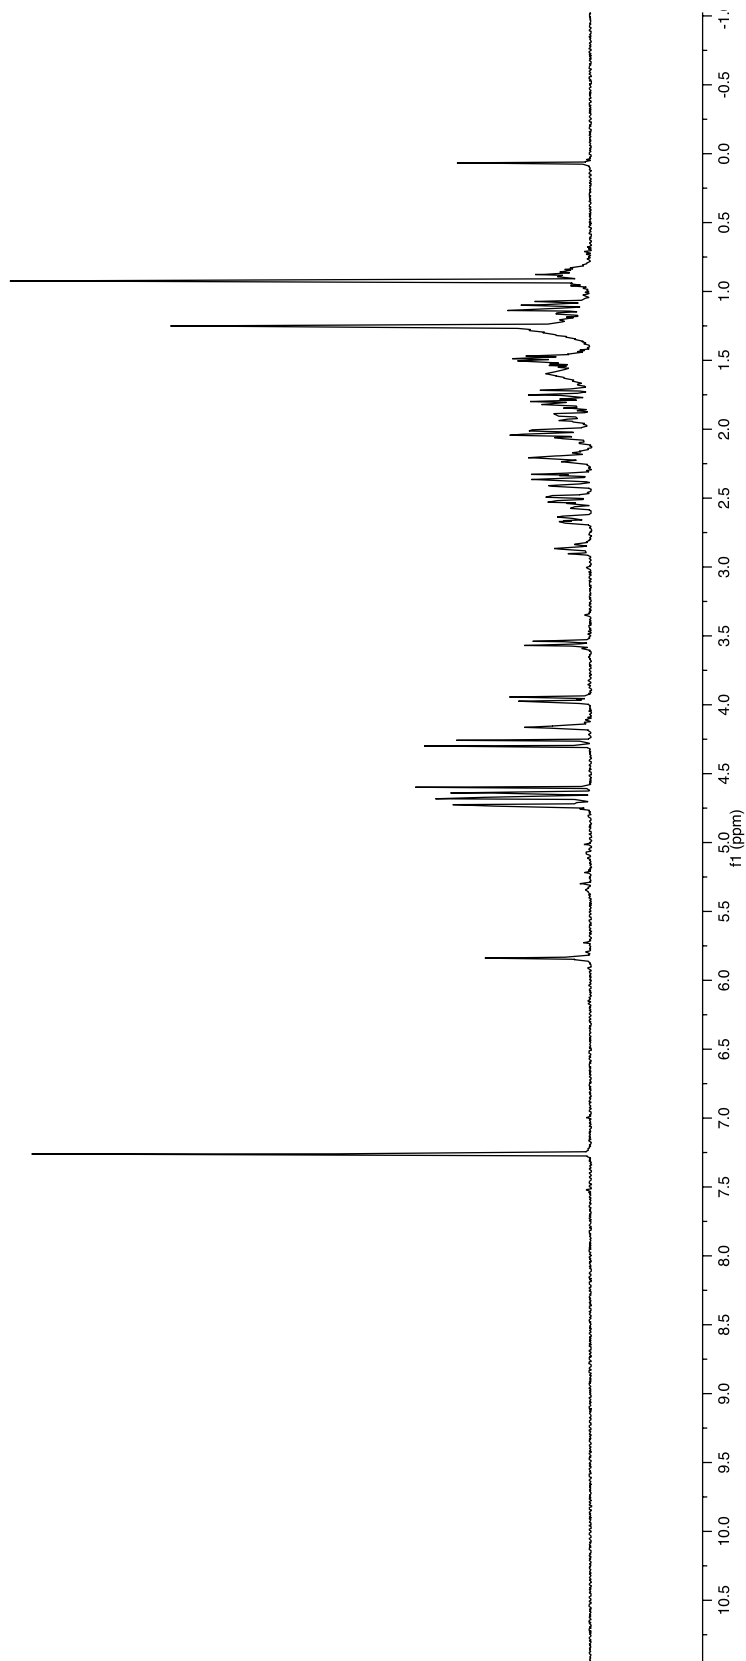



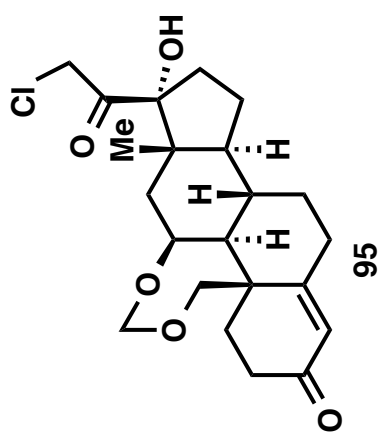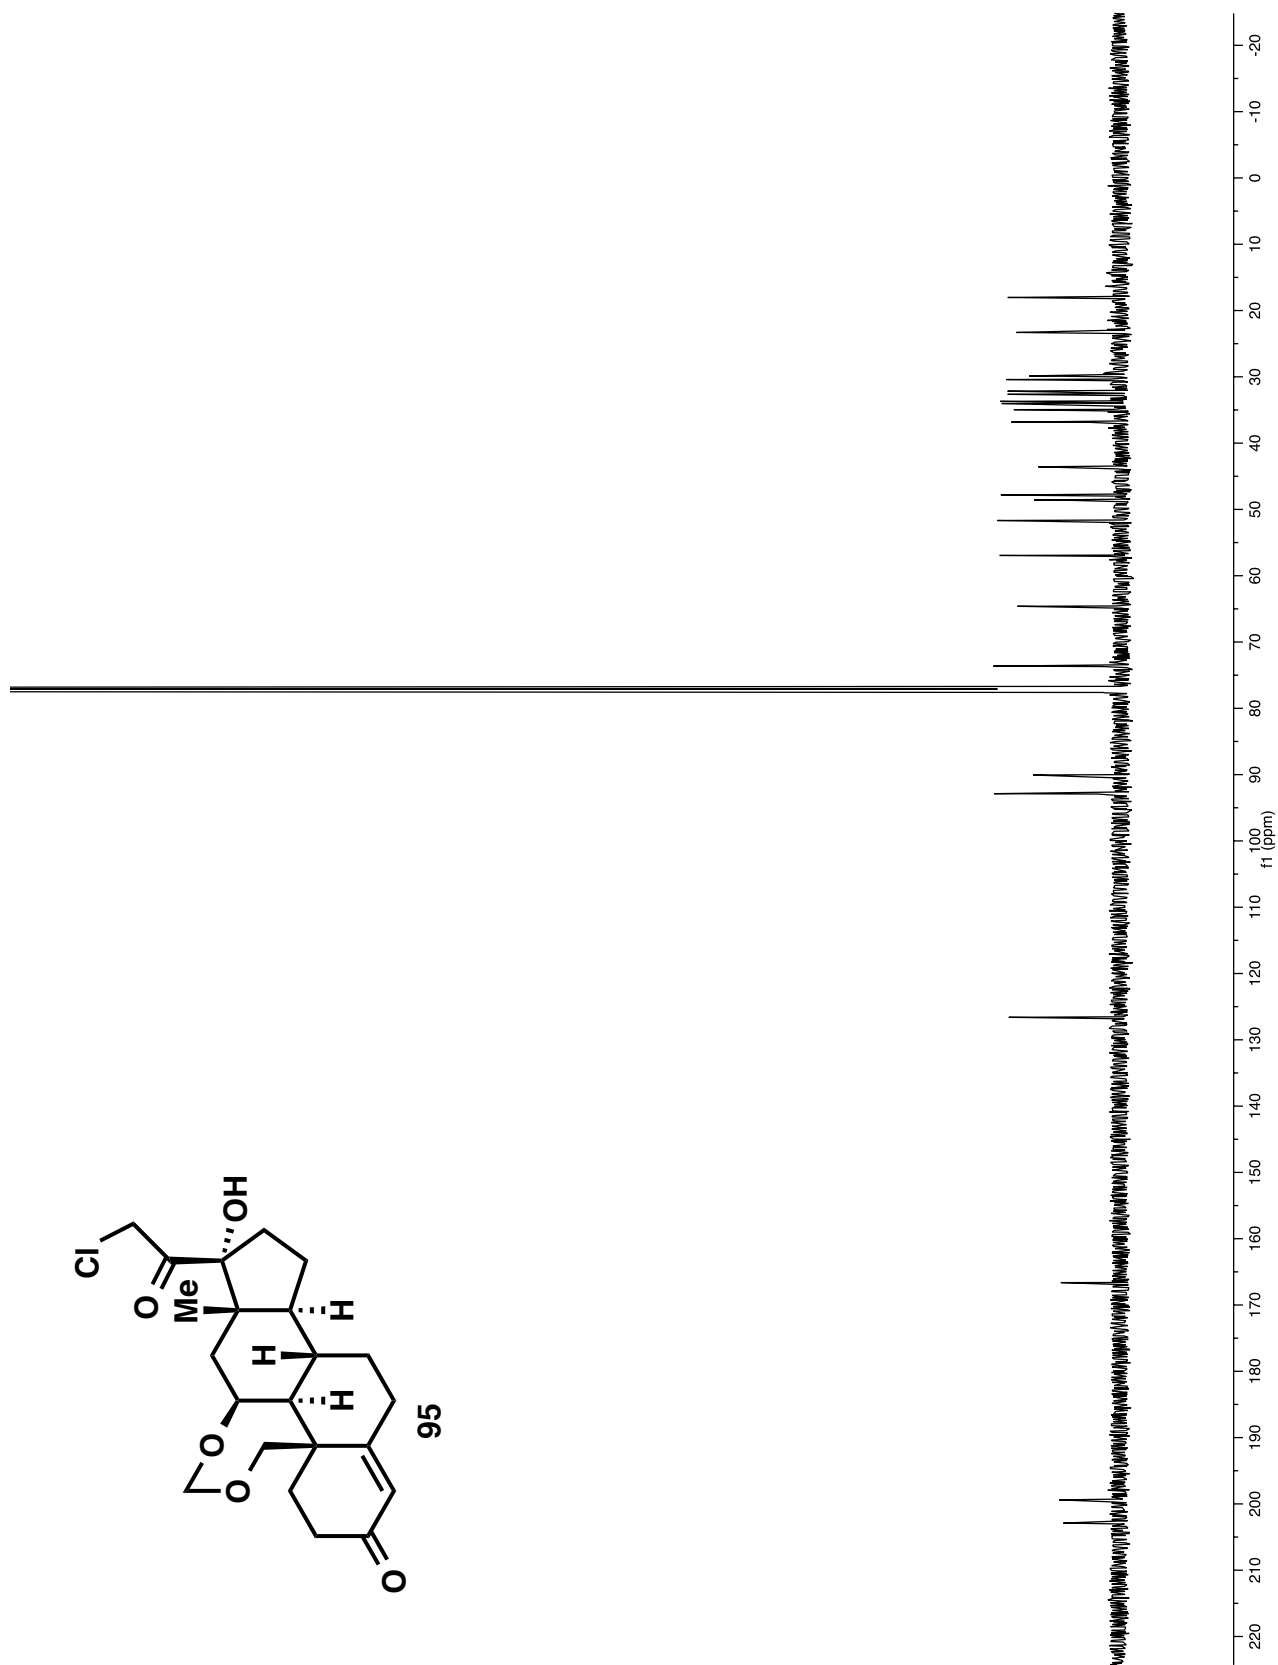

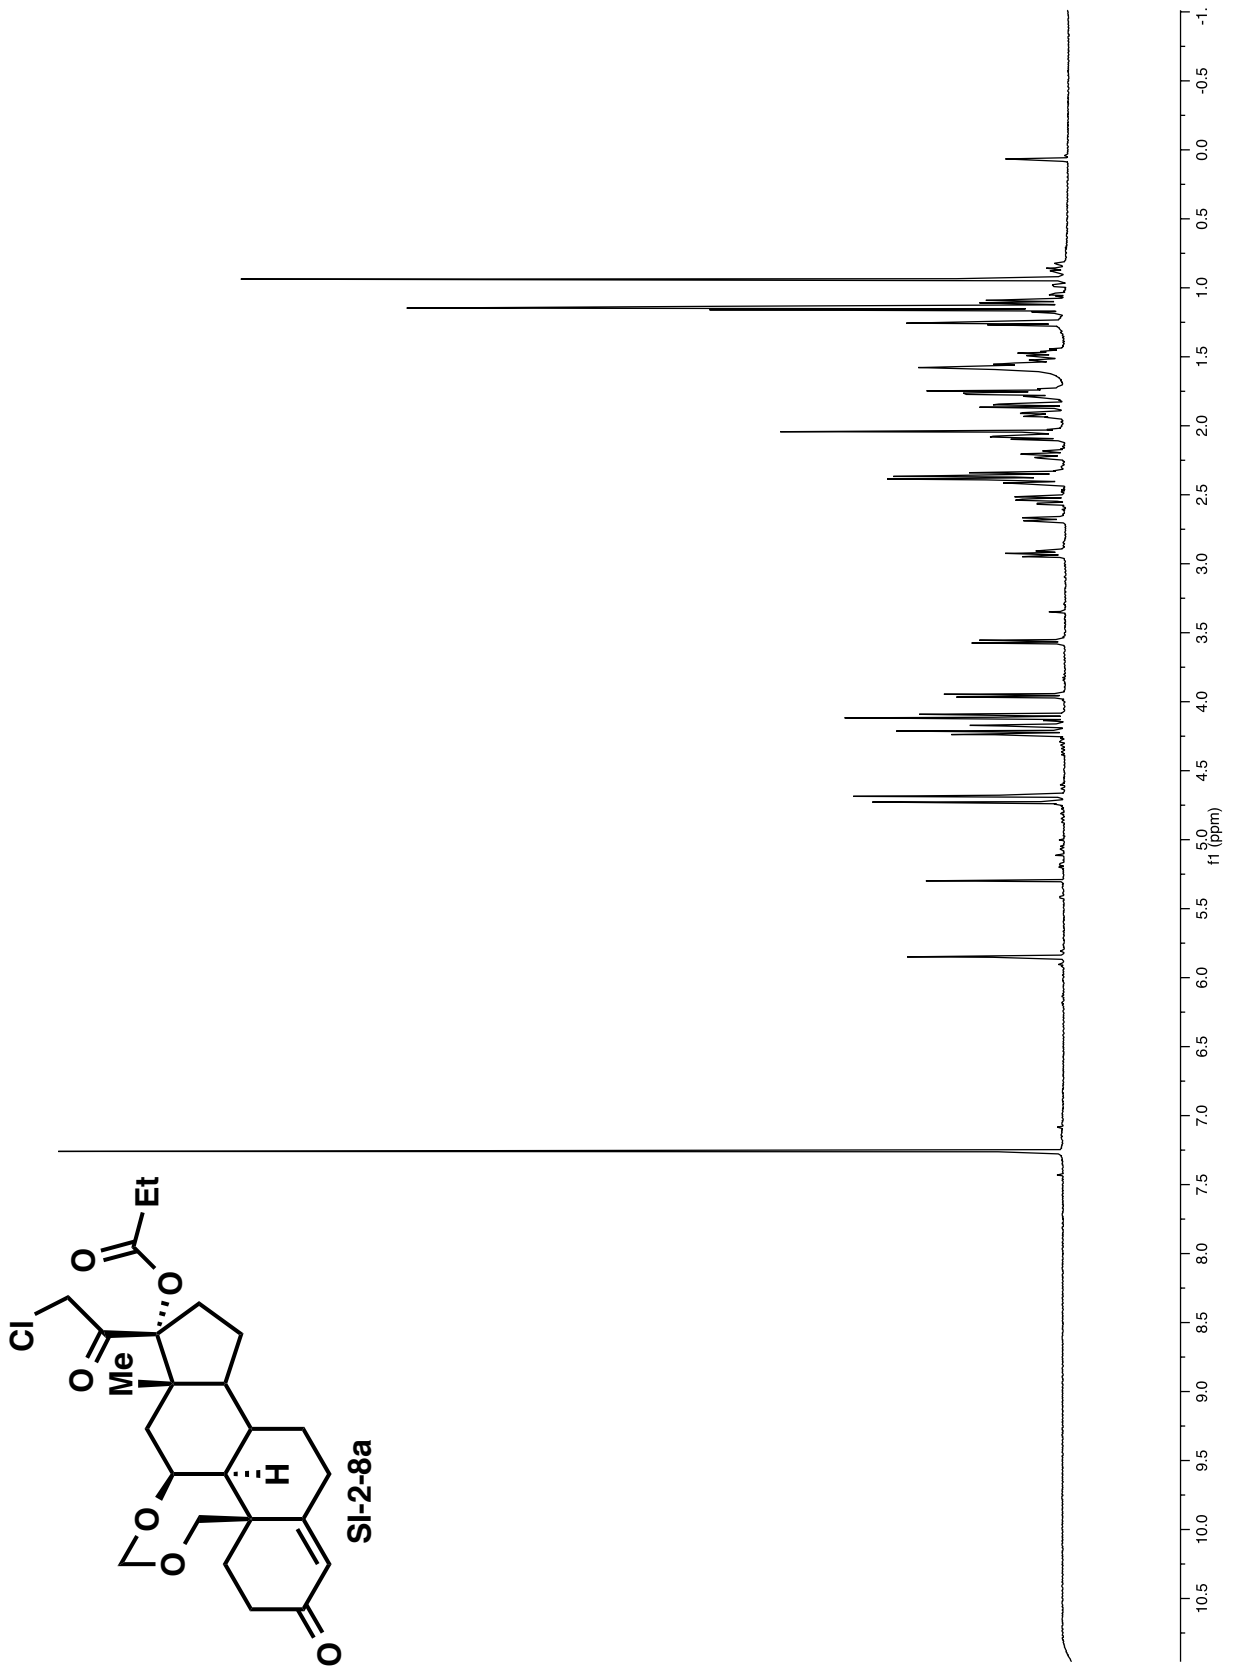

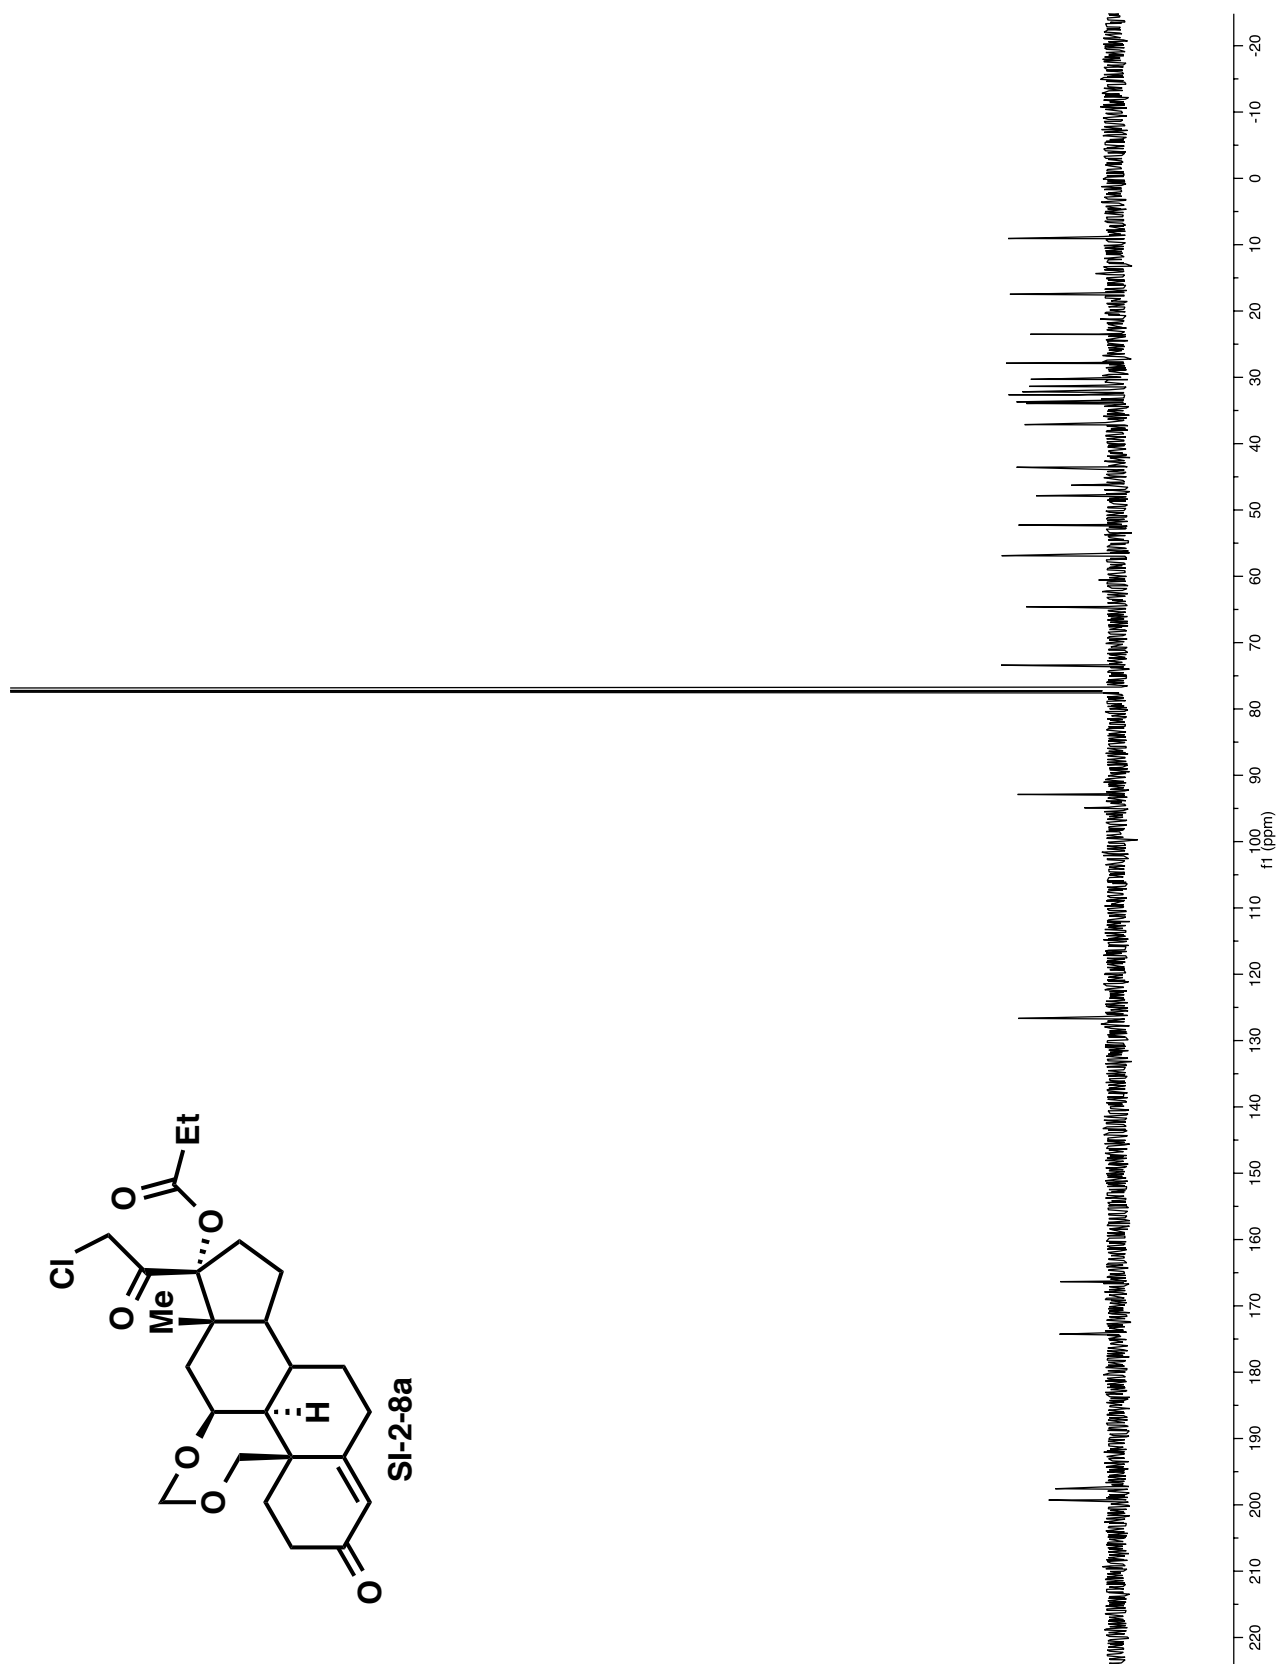

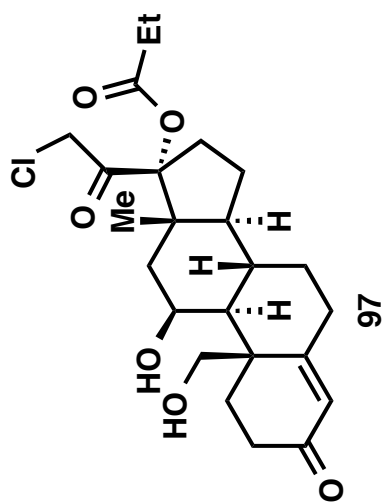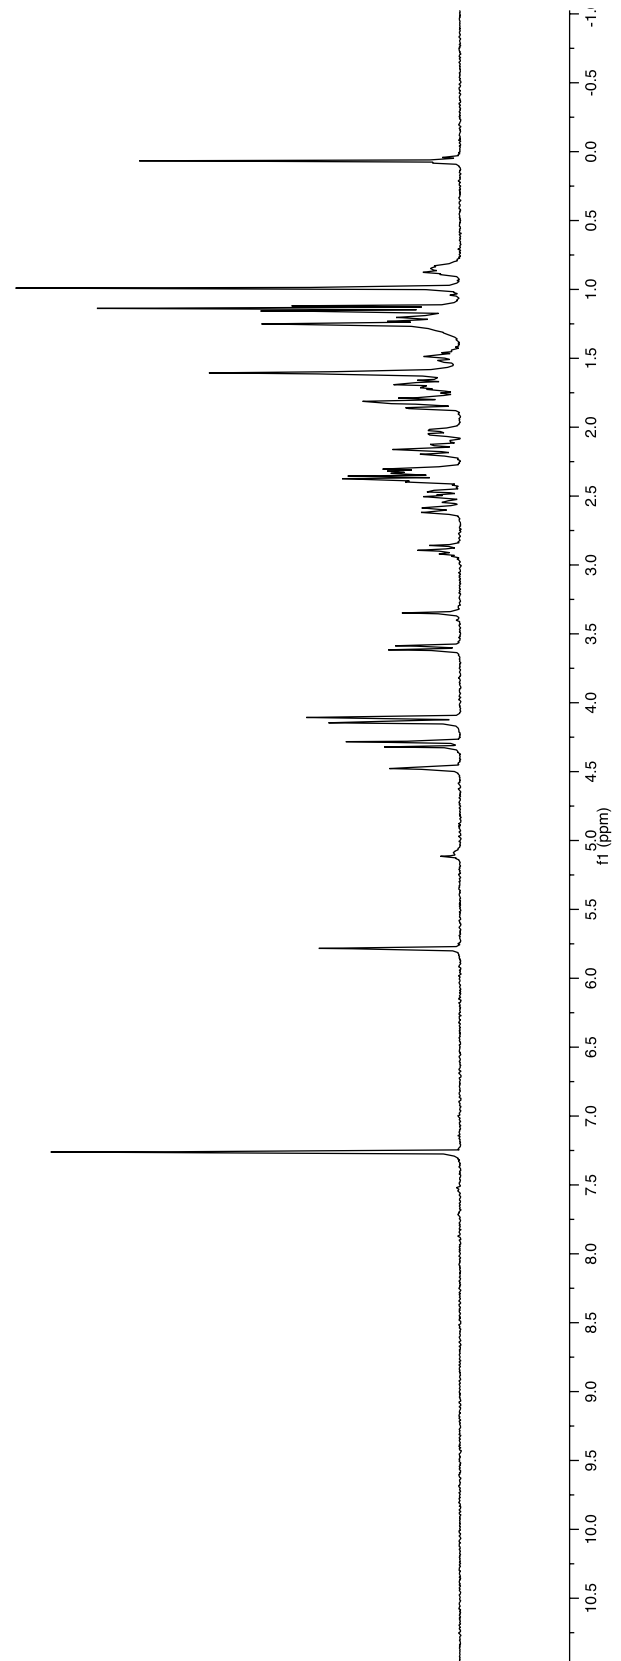

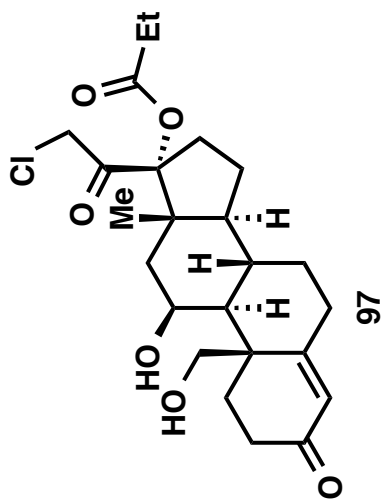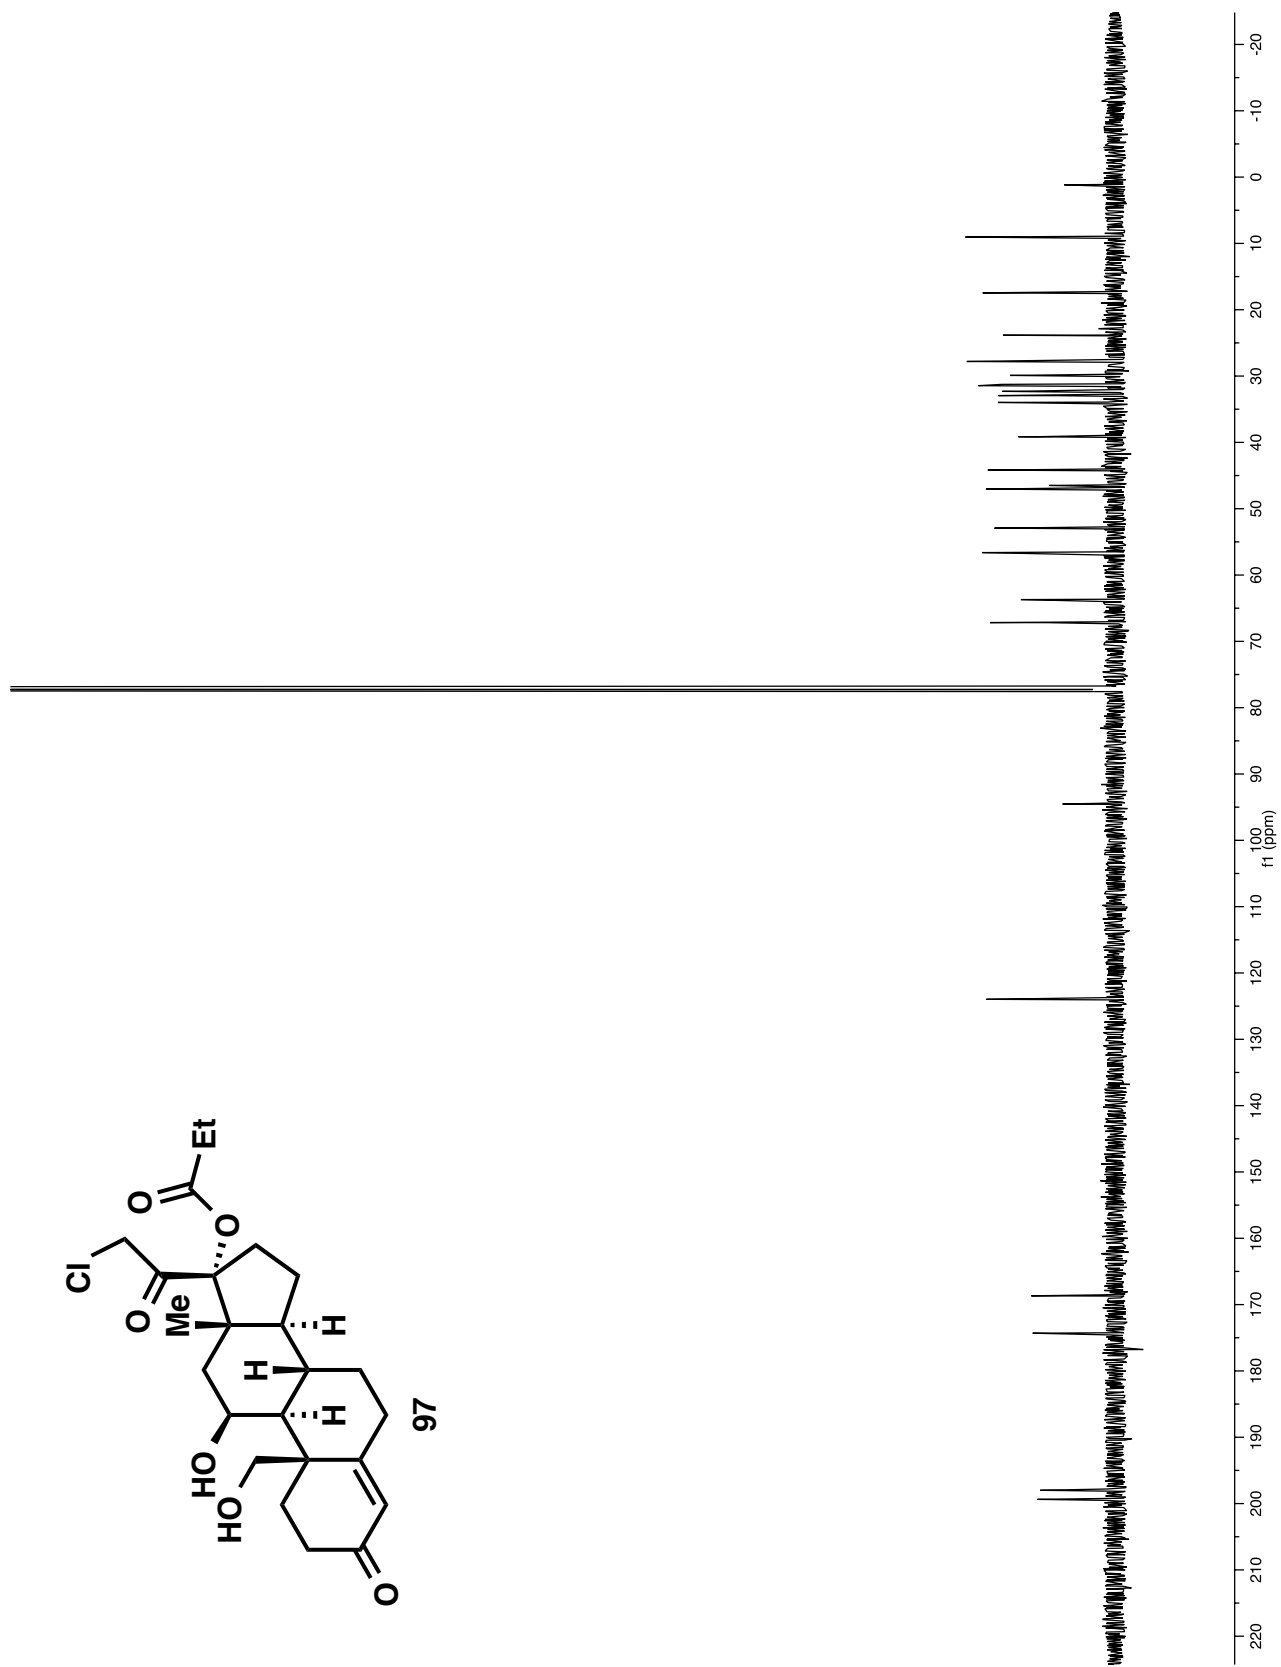

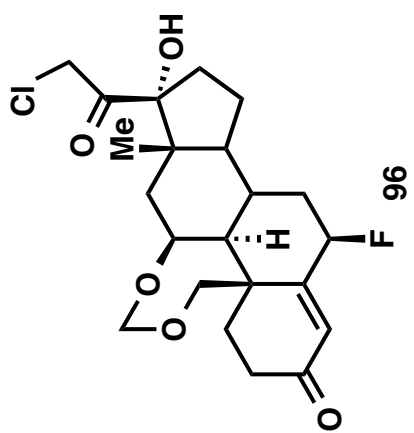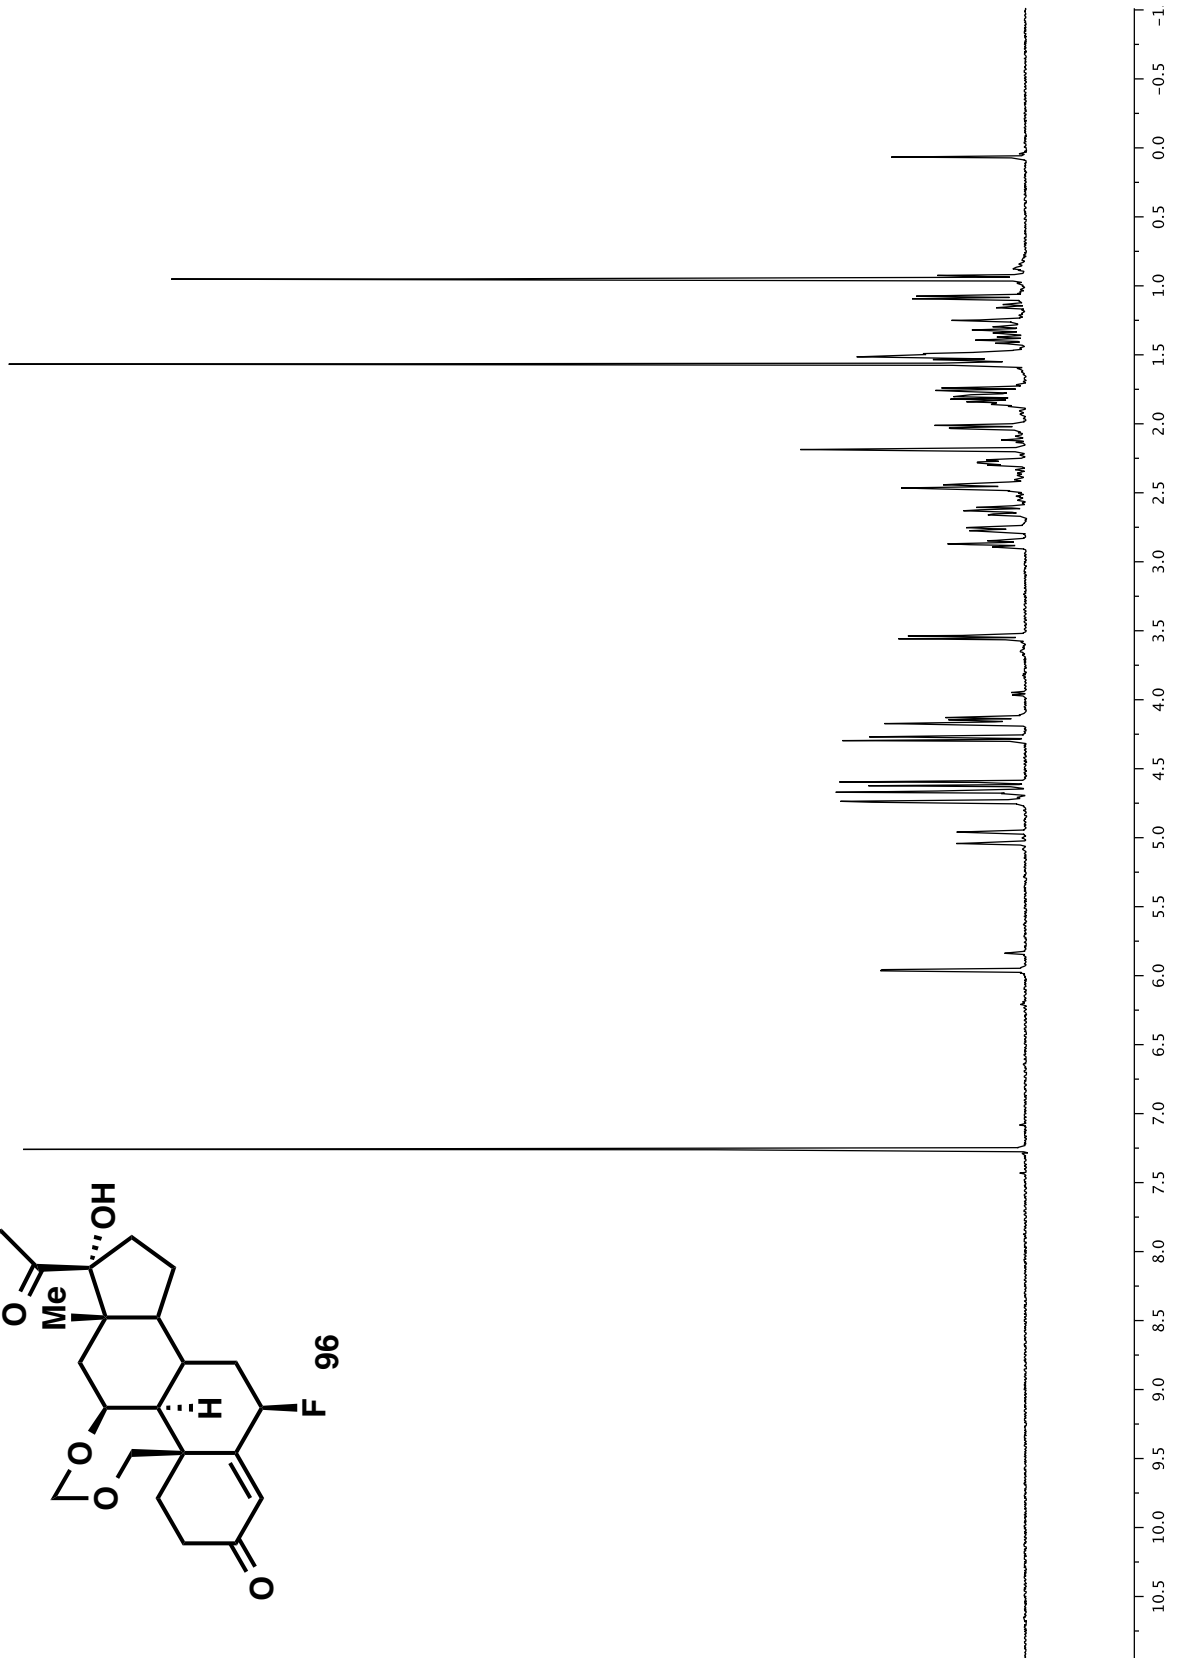

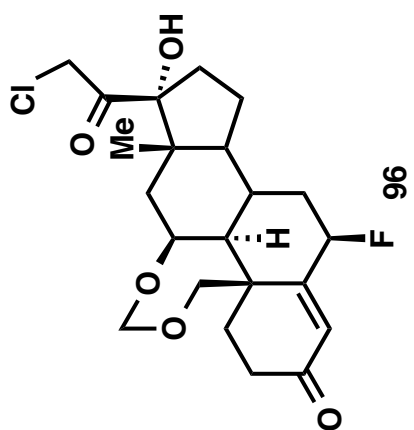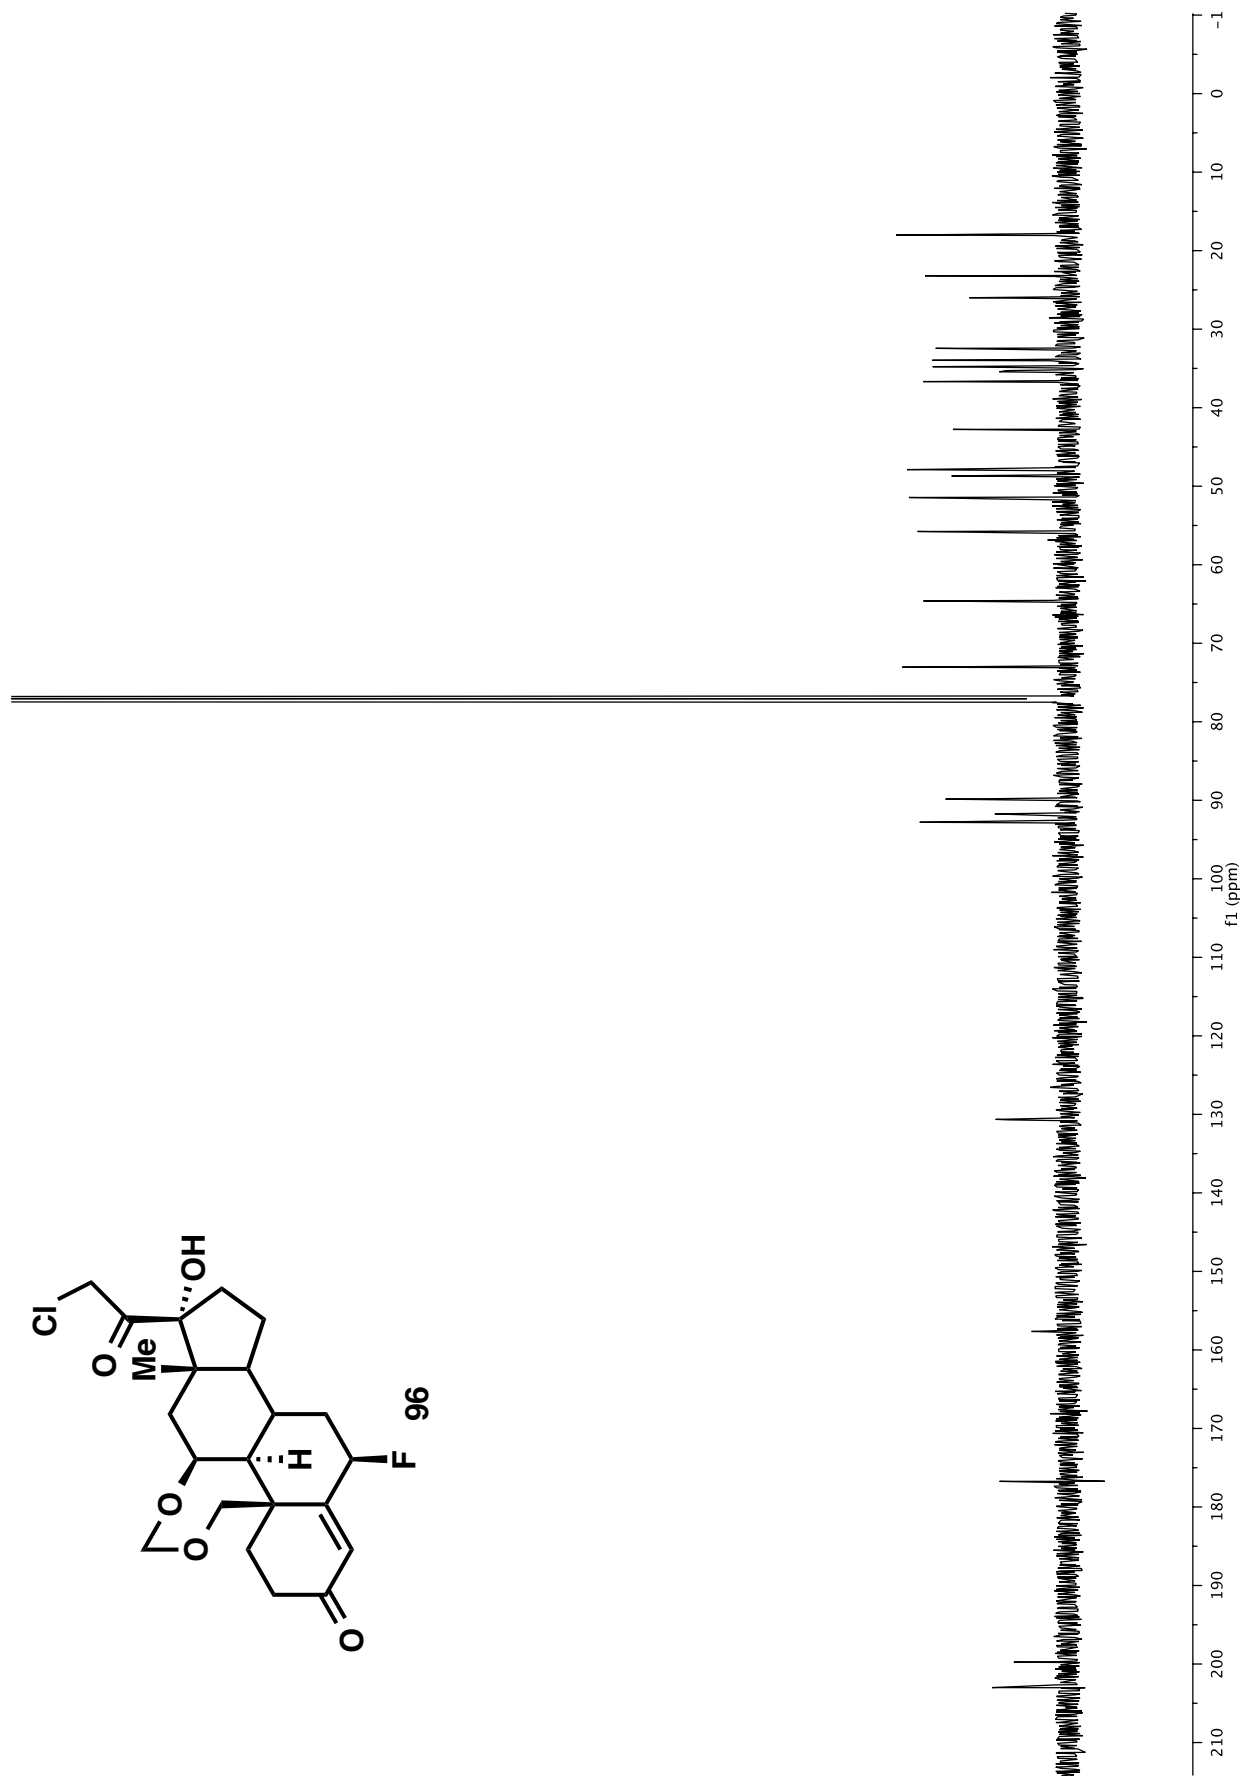

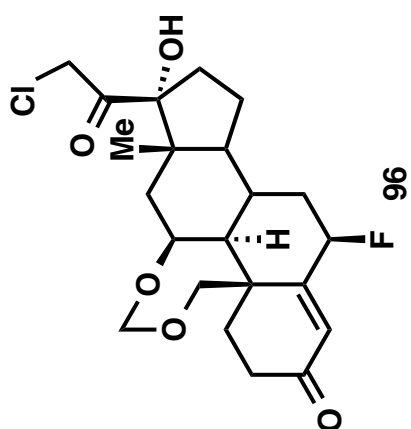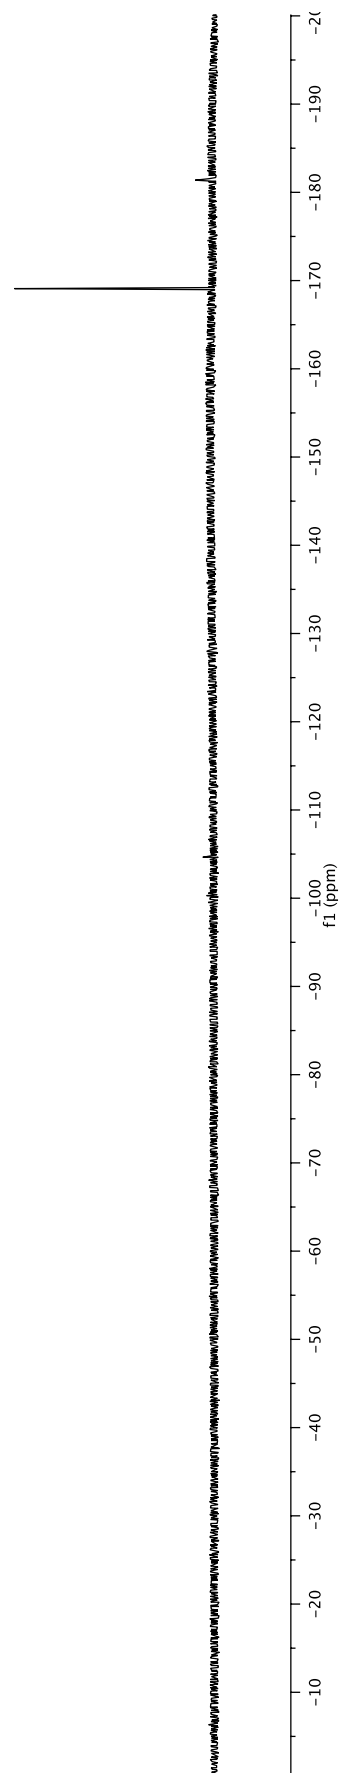



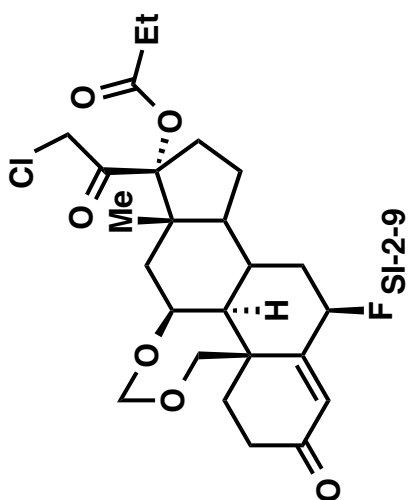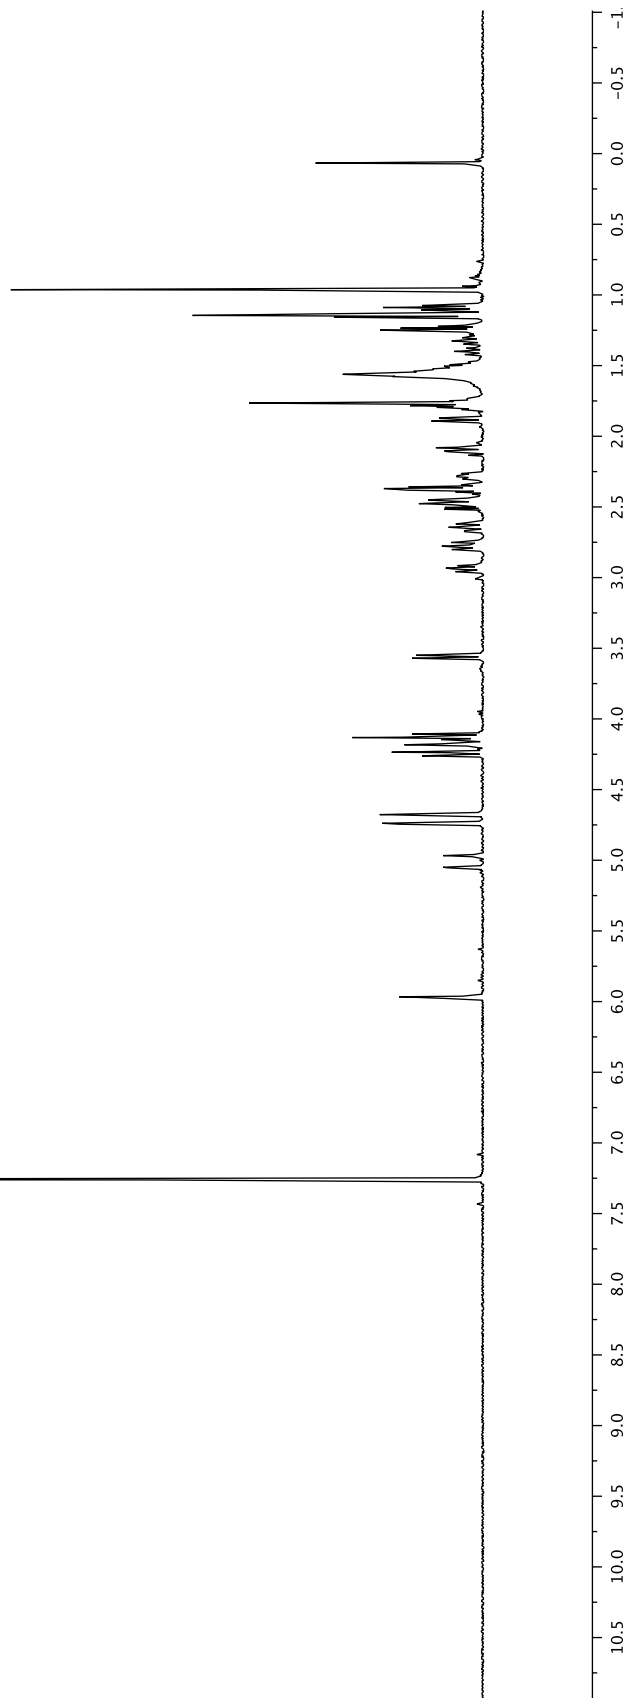

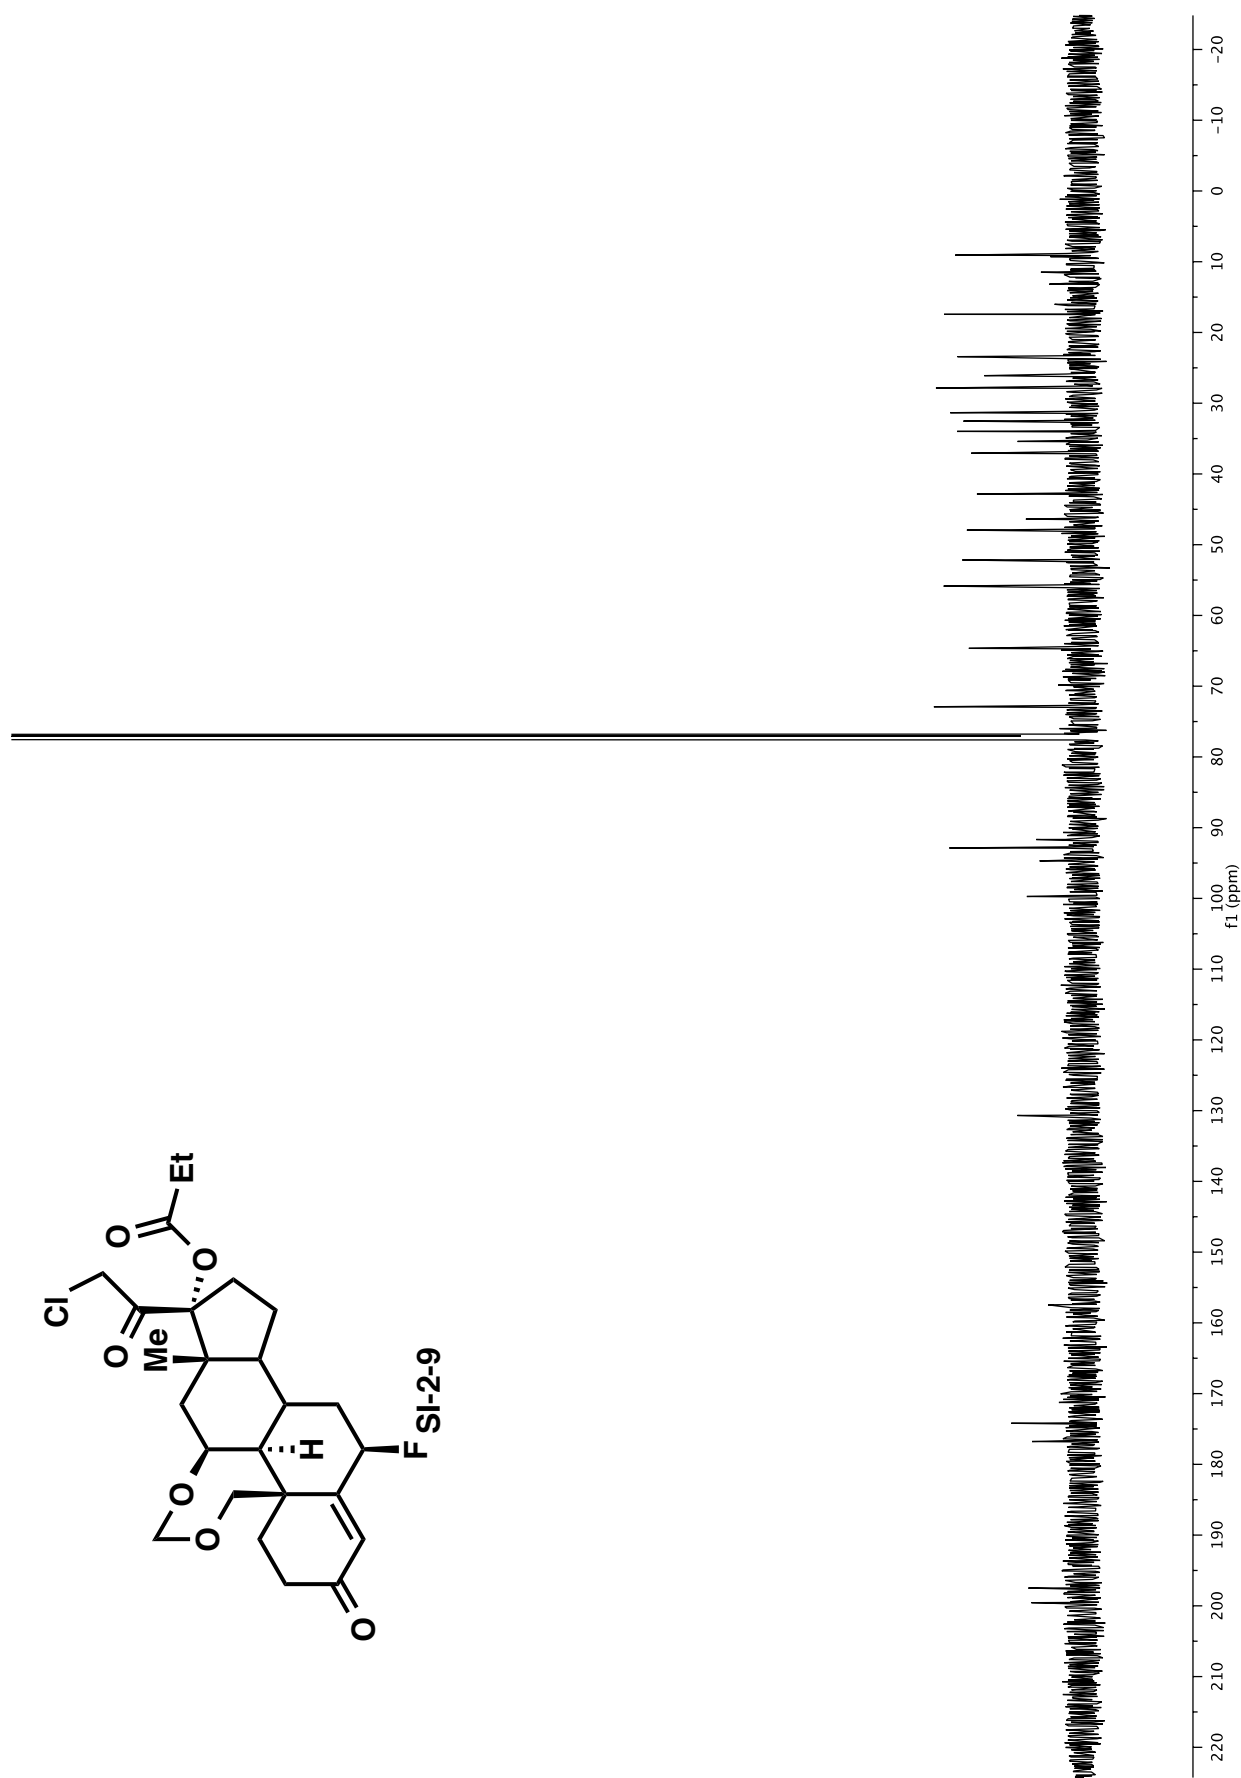

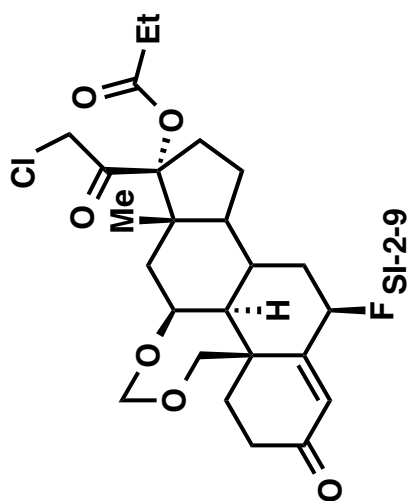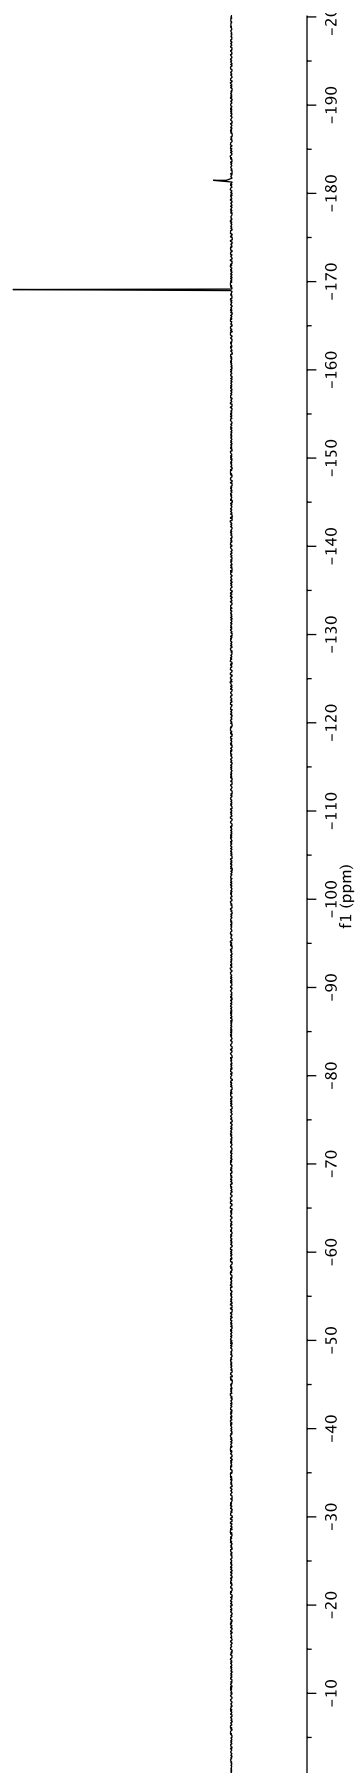

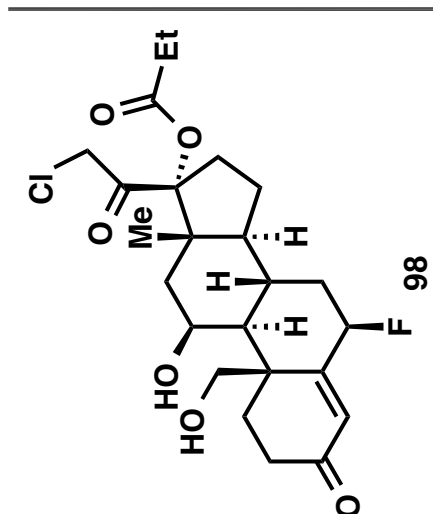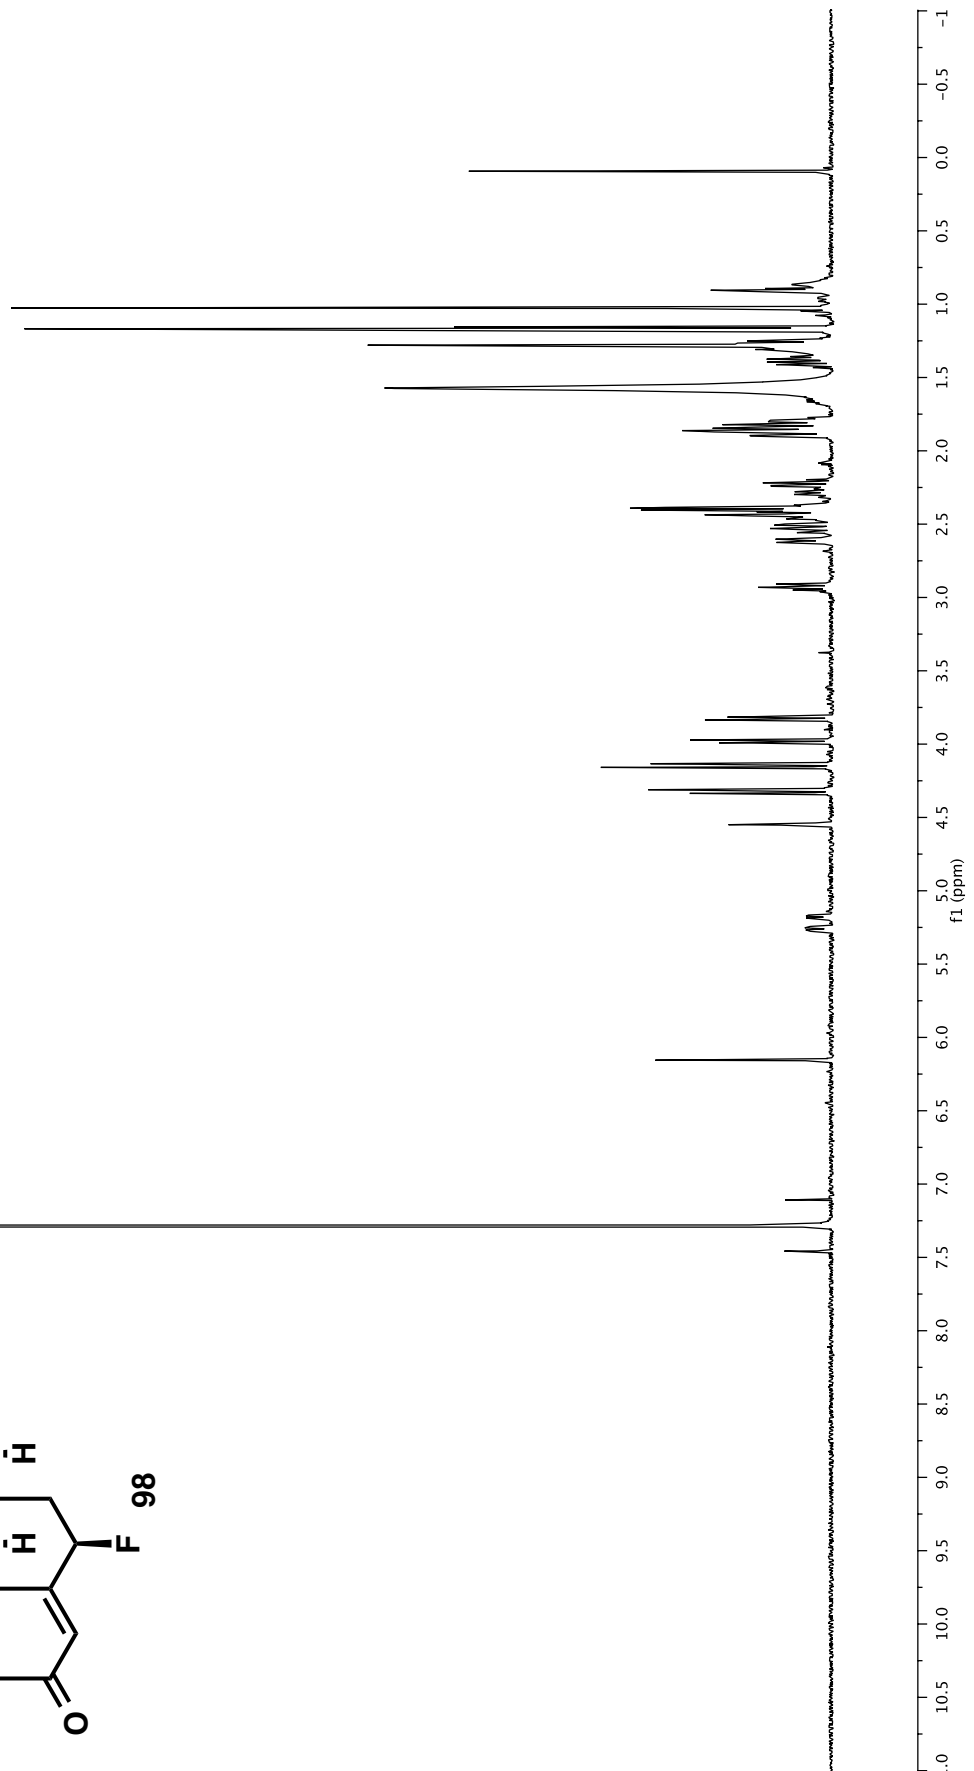

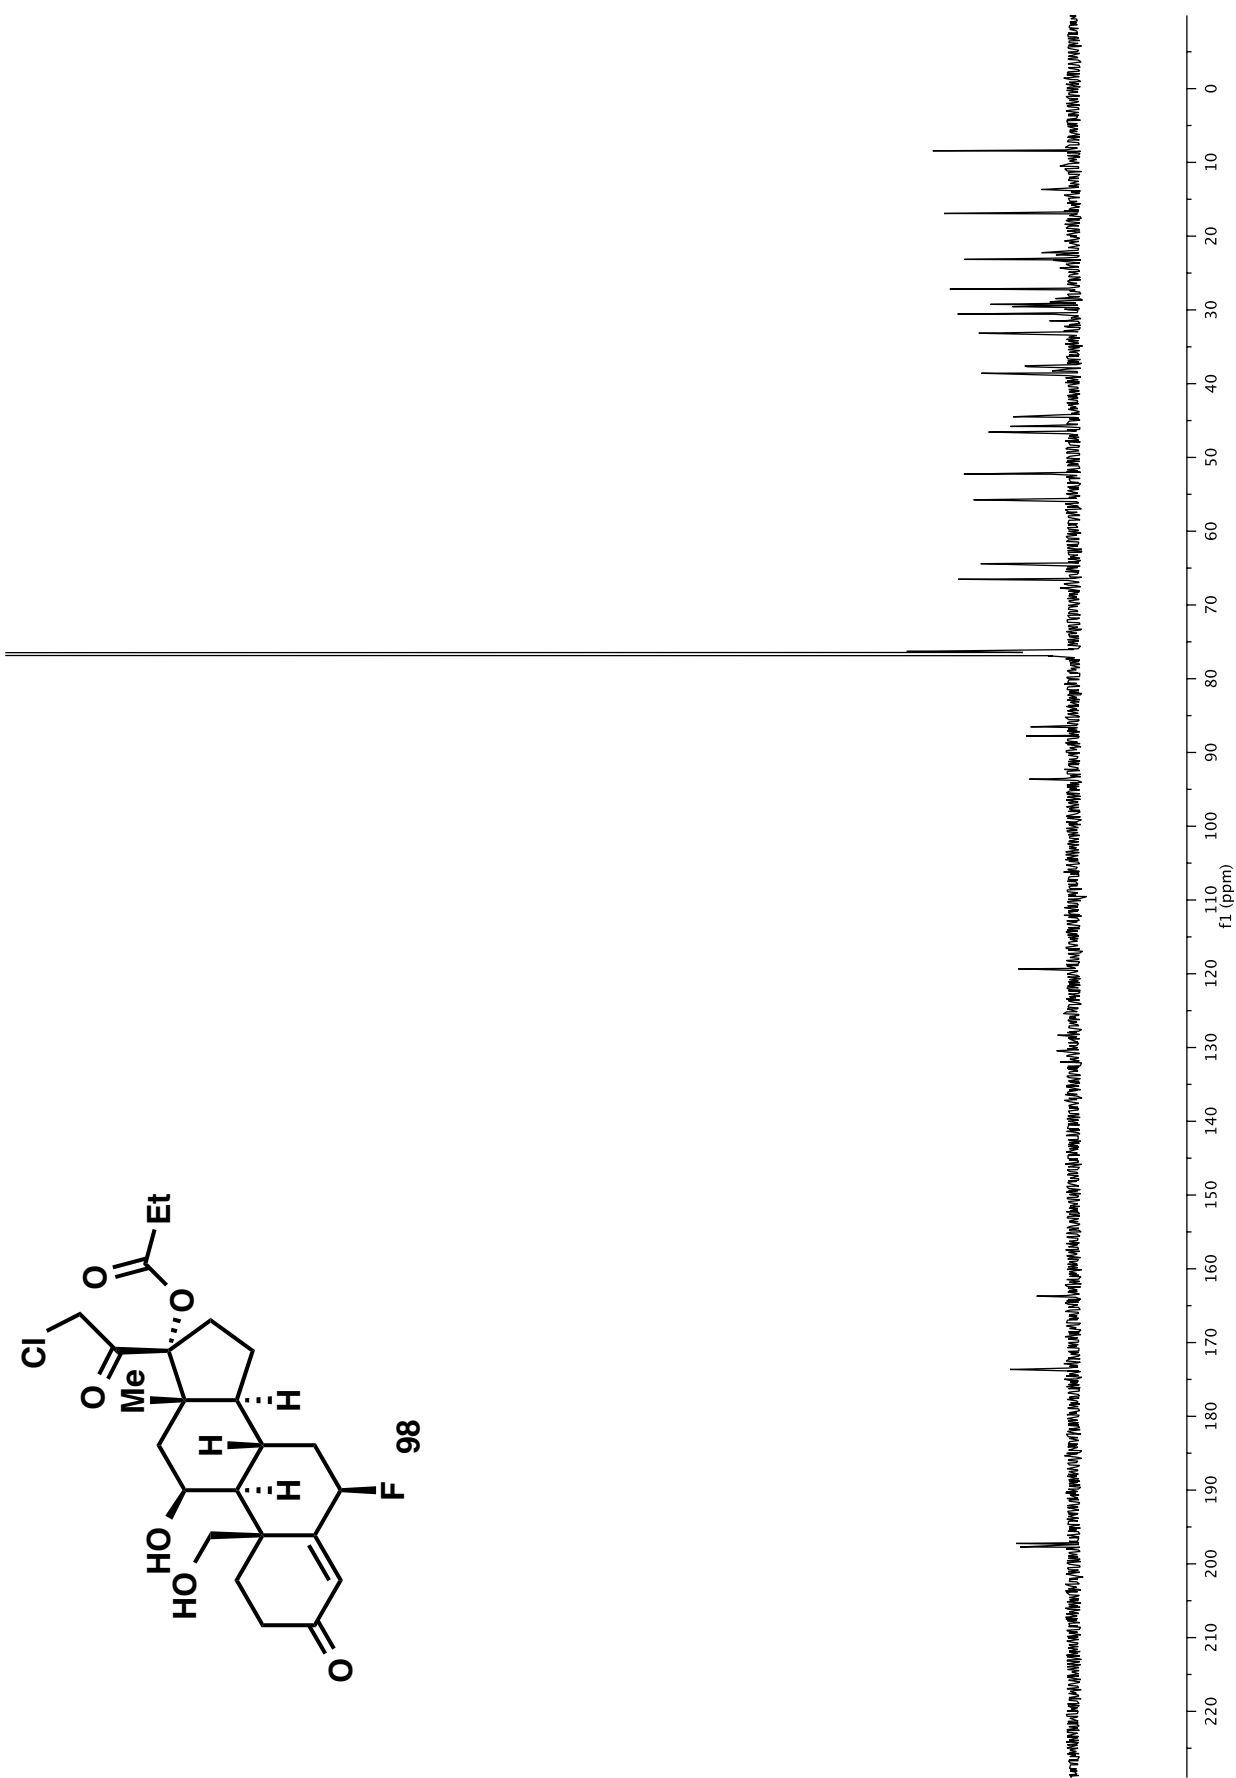

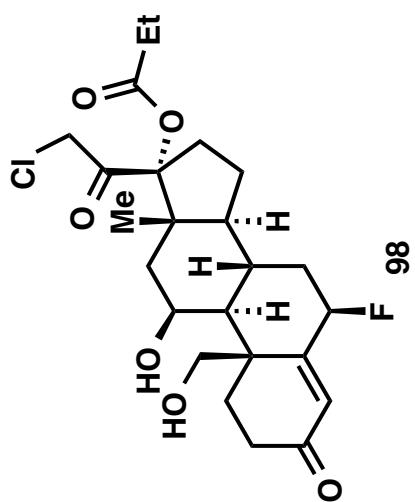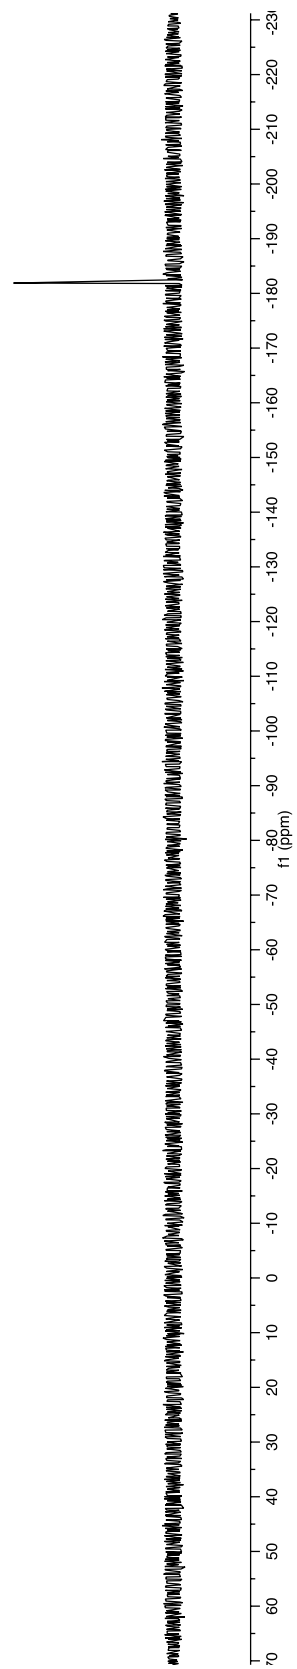

Supplement: ja512022r_si_002.pdf [file ja512022r_si_002.pdf]
